# Supplementary material for: Structural, mechanistic, and physiological insights into phospholipase A-mediated membrane phospholipid degradation in Pseudomonas aeruginosa
Source: eLife journal article supplement (doi:10.7554/elife.72824), 2022-05-10
Supplement: fig1-data3 [file elife-72824-fig1-data3-v2.pdf]

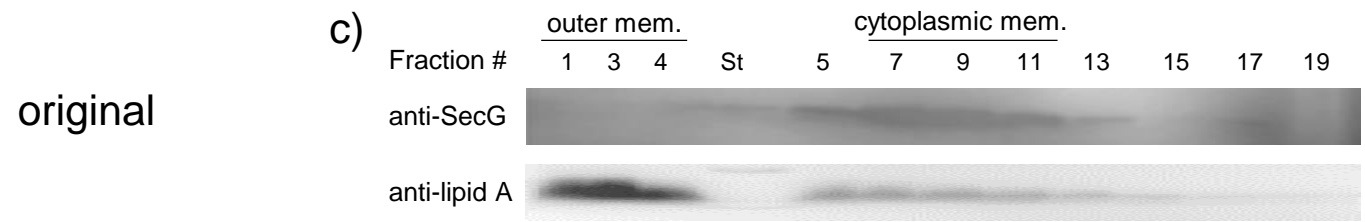

uncropped

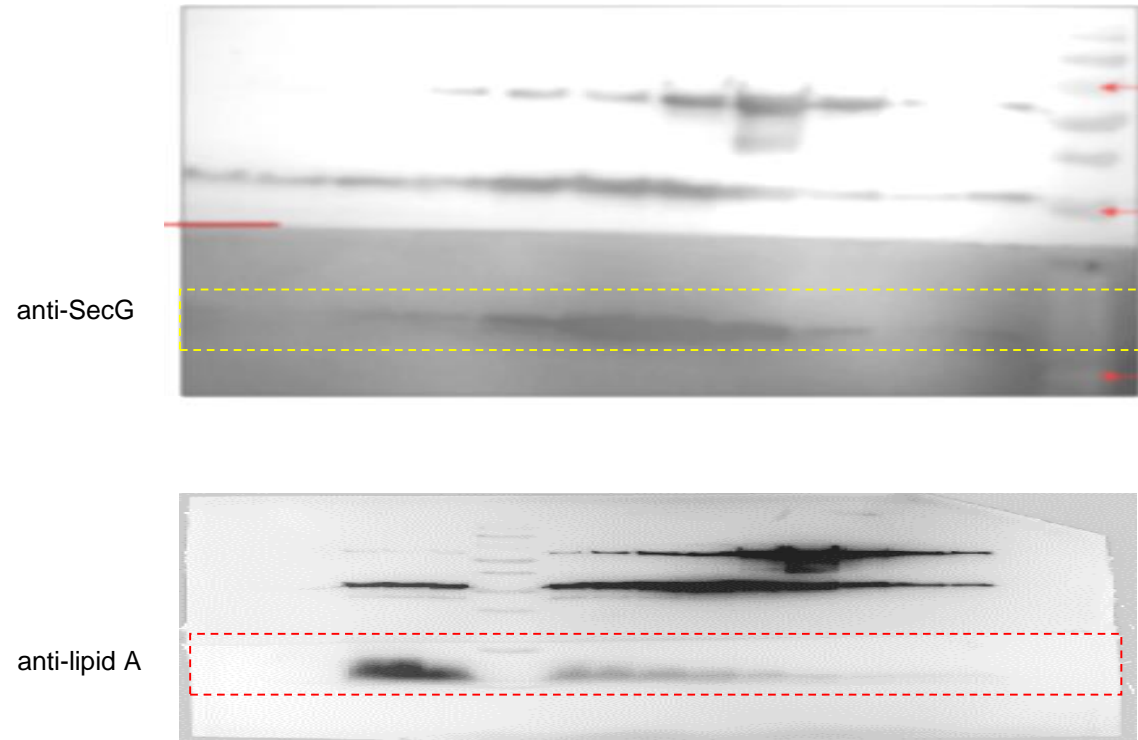

Figure 1c
