# Supplementary material for: Structural, mechanistic, and physiological insights into phospholipase A-mediated membrane phospholipid degradation in Pseudomonas aeruginosa
Source: eLife journal article supplement (doi:10.7554/elife.72824), 2022-05-10

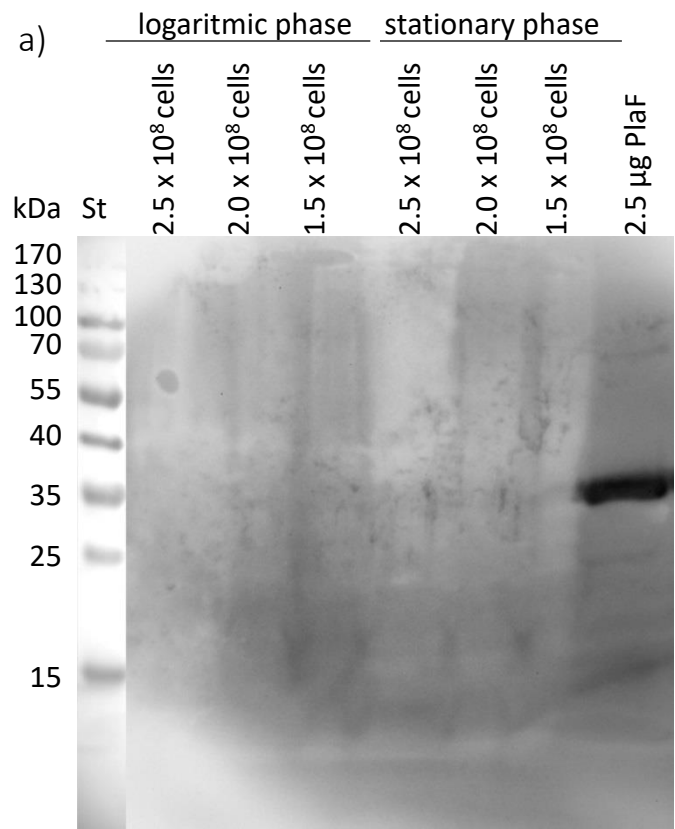

Supplement: fig7-figsupp2-data2 [file elife-72824-fig7-figsupp2-data2-v2.pdf]
