# Supplementary material for: Structural, mechanistic, and physiological insights into phospholipase A-mediated membrane phospholipid degradation in Pseudomonas aeruginosa
Source: eLife. 2022 May 10;11:e72824. doi: 10.7554/eLife.72824 (PMC9132575; doi:10.7554/eLife.72824)
Supplement: Figure 1—source data 5. [file elife-72824-fig1-data5.xlsx]

## Sheet: Figure 1a
	pNPC	4	5	6	average	st.dev.	% st.dev
		0 sec
EV	Sol	1.036	1.009	1.021	1.022	0.0135277	1.32365
	Mem	1.024	1.018	1.021	1.021	0.003	0.29383
PlbF	Sol	1.02	1.006	1.015	1.01367	0.0070946	0.699895
	Mem	2.32	2.286	2.514	2.37333	0.123001	5.18264
PlbF H6	Sol	1.477	1.502	1.487	1.48867	0.0125831	0.845257
	Mem	1.765	2.022	2.268	2.01833	0.25152	12.4618
	buffer	0.975	0.973	0.971	0.973	0.002	0.20555
PlbF total cells		1.818	2.176	2.004	1.99933	0.179046	8.95527
		45 sec							DOD410(45-0sec)	DOD - Buffer	DOD/min
EV	Sol	1.065	1.038	1.053	1.052	0.0135277	1.28591		0.03	0.0336667	0.0448889
	Mem	1.05	1.045	1.051	1.04867	0.00321455	0.306537		0.0276667	0.0313333	0.0417778			DOD410nm
PlbF	Sol	1.036	1.022	1.033	1.03033	0.00737111	0.715411		0.0166667	0.0203333	0.0271111			Soluble	Membrane
	Mem	3.762	3.814	3.957	3.84433	0.100977	2.62664		1.471	1.47467	1.96622		EV	0.03	0.028
PlbF H6	Sol	2.171	2.215	2.154	2.18	0.0314802	1.44404		0.691333	0.695	0.926667		PlbFH6	0.691	1.405
	Mem	3.125	3.41	3.735	3.42333	0.305219	8.91583		1.405	1.40867	1.87822		PlbF	0.017	1.471	52.5357
	buffer	0.971	0.97	0.967	0.969333	0.00208167	0.214752		-0.00366667	0	0			St. Dev
PlbF total cells		3.668	3.934	3.898	3.83333	0.14431	3.7646		1.834	1.83767	2.45022		PlbFH6	0.000385772	8.58303e-05
													EV	0.00997834	0.125267
													PlbF	0.00012162	0.0386379
		900 sec							DOD410(900-0sec)	DOD - Buffer	DOD/min
EV	Sol	1.594	1.574	1.621	1.59633	0.0235867	1.47756		0.574333	0.720333	0.0480222
	Mem	1.647	1.665	1.69	1.66733	0.0215948	1.29517		0.646333	0.792333	0.0528222
	Buffer	0.843	0.824	0.814	0.827	0.0147309	1.78125		-0.146	0	0
