# Supplementary material for: Structural, mechanistic, and physiological insights into phospholipase A-mediated membrane phospholipid degradation in Pseudomonas aeruginosa
Source: eLife. 2022 May 10;11:e72824. doi: 10.7554/eLife.72824 (PMC9132575; doi:10.7554/eLife.72824)
Supplement: Figure 1—source data 6. [file elife-72824-fig1-data6.xlsx]

## Sheet: Figure 1c
Zeit Beginn 0
	1	2	3	4	5	6	7	8	9	10	11	12
A	0.649	0.532	0.589	0.859	0.887	0.928	0.499	0.501	0.452	0.276	0.266	0.256		0.649	0.532	0.589	0.859	0.887	0.928	0.499	0.501	0.452	0.276	0.266	0.256
B	0.526	0.495	0.429	1.122	1.094	1.102	0.399	0.404	0.358	0.282	0.276	0.269		0.526	0.495	0.429	1.122	1.094	1.102	0.399	0.404	0.358	0.282	0.276	0.269
C	0.537	0.524	0.532	1.287	0.983	1.076	0.341	0.353	0.359	0.282	0.277	0.271		0.537	0.524	0.532	1.287	0.983	1.076	0.341	0.353	0.359	0.282	0.277	0.271
D	0.476	0.508	0.428	1.067	1.141	0.959	0.325	0.334	0.34	0.283	0.279	0.269		0.476	0.508	0.428	1.067	1.141	0.959	0.325	0.334	0.34	0.283	0.279	0.269
E	0.474	0.532	0.519	0.968	0.626	1.017	0.314	0.325	0.327	0.282	0.279	0.269		0.474	0.532	0.519	0.968	0.626	1.017	0.314	0.325	0.327	0.282	0.279	0.269
F	0.676	0.601	0.568	0.891	0.513	0.573	0.314	0.325	0.324	0.281	0.28	0.272		0.676	0.601	0.568	0.891	0.513	0.573	0.314	0.325	0.324	0.281	0.28	0.272
G	0.529	0.56	0.668	0.728	0.772	0.777	0.431	0.442	0.442	0.285	0.107	0.116		0.529	0.56	0.668	0.728	0.772	0.777	0.431	0.442	0.442	0.285	0.107	0.116
H	0.96	0.696	0.74	0.808	0.758	0.706	0.256	0.261	0.267	0.279	0.108	0.103		0.96	0.696	0.74	0.808	0.758	0.706	0.256	0.261	0.267	0.279	0.108	0.103
														1.577	1.132	1.395	2.413	2.454	2.81	1.476	1.593	1.248	0.267	0.259	0.248
Zeit Ende 120 sec														1.135	0.986	0.683	3.307	3.195	3.18	0.982	1.027	0.746	0.273	0.268	0.266
	1	2	3	4	5	6	7	8	9	10	11	12		1.184	1.051	1.083	3.757	2.835	3.222	0.652	0.674	0.72	0.276	0.271	0.267
A	1.577	1.132	1.395	2.413	2.454	2.81	1.476	1.593	1.248	0.267	0.259	0.248		0.812	0.965	0.673	3.237	3.453	2.946	0.583	0.58	0.571	0.278	0.272	0.265
B	1.135	0.986	0.683	3.307	3.195	3.18	0.982	1.027	0.746	0.273	0.268	0.266		0.881	1.207	1.108	2.769	1.531	2.994	0.52	0.524	0.541	0.271	0.271	0.264
C	1.184	1.051	1.083	3.757	2.835	3.222	0.652	0.674	0.72	0.276	0.271	0.267		1.646	1.272	1.162	2.459	1.122	1.475	0.551	0.542	0.526	0.273	0.272	0.266
D	0.812	0.965	0.673	3.237	3.453	2.946	0.583	0.58	0.571	0.278	0.272	0.265		1.195	1.24	1.523	1.895	2.129	2.315	1.158	1.18	1.196	0.28	0.114	0.123
E	0.881	1.207	1.108	2.769	1.531	2.994	0.52	0.524	0.541	0.271	0.271	0.264		2.713	1.682	1.873	2.315	2.224	2.236	0.255	0.258	0.263	0.276	0.115	0.112
F	1.646	1.272	1.162	2.459	1.122	1.475	0.551	0.542	0.526	0.273	0.272	0.266
G	1.195	1.24	1.523	1.895	2.129	2.315	1.158	1.18	1.196	0.28	0.114	0.123
H	2.713	1.682	1.873	2.315	2.224	2.236	0.255	0.258	0.263	0.276	0.115	0.112
Differenz														Differenz
	1	2	3	4	5	6	7	8	9	10	11	12			1	2	3	4	5	6	7	8	9	10	11	12
A	0.928	0.6	0.806	1.554	1.567	1.882	0.977	1.092	0.796	-0.009	-0.007	-0.008		A	0.928	0.6	0.806	1.554	1.567	1.882	0.977	1.092	0.796	-0.009	-0.007	-0.008
B	0.609	0.491	0.254	2.185	2.101	2.078	0.583	0.623	0.388	-0.009	-0.008	-0.003		B	0.609	0.491	0.254	2.185	2.101	2.078	0.583	0.623	0.388	-0.009	-0.008	-0.003
C	0.647	0.527	0.551	2.47	1.852	2.146	0.311	0.321	0.361	-0.006	-0.006	-0.004		C	0.647	0.527	0.551	2.47	1.852	2.146	0.311	0.321	0.361	-0.006	-0.006	-0.004
D	0.336	0.457	0.245	2.17	2.312	1.987	0.258	0.246	0.231	-0.005	-0.007	-0.004		D	0.336	0.457	0.245	2.17	2.312	1.987	0.258	0.246	0.231	-0.005	-0.007	-0.004
E	0.407	0.675	0.589	1.801	0.905	1.977	0.206	0.199	0.214	-0.011	-0.008	-0.005		E	0.407	0.675	0.589	1.801	0.905	1.977	0.206	0.199	0.214	-0.011	-0.008	-0.005
F	0.97	0.671	0.594	1.568	0.609	0.902	0.237	0.217	0.202	-0.008	-0.008	-0.006		F	0.97	0.671	0.594	1.568	0.609	0.902	0.237	0.217	0.202	-0.008	-0.008	-0.006
G	0.666	0.68	0.855	1.167	1.357	1.538	0.727	0.738	0.754	-0.005	0.007	0.007		G	0.666	0.68	0.855	1.167	1.357	1.538	0.727	0.738	0.754	-0.005	0.007	0.007
H	1.753	0.986	1.133	1.507	1.466	1.53	-0.001	-0.003	-0.004	-0.003	0.007	0.009		H	1.753	0.986	1.133	1.507	1.466	1.53	-0.001	-0.003	-0.004	-0.003	0.007	0.009
Mittelwerte		Mittelwerte	st.dev.diff.		Mittelwerte	st.dev.diff.		Mittelwerte	st.dev.diff.		Mittelwerte	st.dev.diff.		Mittelwerte
	1	2	3	4	5	6	7	8	9	10	11	12			1	2	3	4	5	6	7	8	9	10	11	12
A		0.867			1.66767			1.0345			-0.008			A		0.086267			0.185732			0.0813173			-0.008
B		0.55			2.12133			0.603			-0.00666667			B		0.0834386			0.0563235			0.0282843			-0.00666667
C		0.575			2.156			0.331			-0.00533333			C		0.063498			0.309121			0.0264575			-0.00533333
D		0.346			2.15633			0.245			-0.00533333			D		0.106353			0.16293			0.0135277			-0.00533333
E		0.632			1.889			0.206333			-0.008			E		0.0608112			0.124451			0.00750555			-0.008
F		0.6325			1.235			0.218667			-0.00733333			F		0.0544472			0.470933			0.0175594			-0.00733333
G		0.673			1.354			0.739667			0.003			G		0.00989949			0.185518			0.0135769			0.003
H		1.0595			1.501			-0.00266667			0.00433333			H		0.103945			0.0324191			0.00152753			0.00433333
Blank 38	-0.003
Blank 65	-0.008
Mittelwert	-0.0055
Final	DA410nm/120sec
	1 bis 3	4 bis 6	7 bis 9	10 bis 12
A	0.8725	1.67317	1.04	-0.0025
B	0.5555	2.12683	0.6085	-0.00116667
C	0.5805	2.1615	0.3365	0.000166667
D	0.3515	2.16183	0.2505	0.000166667
E	0.6375	1.8945	0.211833	-0.0025
F	0.638	1.2405	0.224167	-0.00183333
G	0.6785	1.3595	0.745167	0.0085
H	1.065	1.5065	0.00283333	0.00983333
Fraktion	DOD410nm/120s	st.dev. DOD410nm/120s	PlbF
1	0.8725	0.086267
2	0.5555	0.0834386
3	0.5805	0.063498
4	0.3515	0.106353
5	0.6375	0.0608112
6	0.638	0.0544472
7	0.6785	0.00989949
8	1.065	0.103945
9	1.67317	0.185732
10	2.12683	0.0563235
11	2.1615	0.309121
12	2.16183	0.16293
13	1.8945	0.124451
14	1.2405	0.470933
15	1.3595	0.185518
16	1.5065	0.0324191
17	1.04	0.0813173
18	0.6085	0.0282843
19	0.3365	0.0264575
20	0.2505	0.0135277
21	0.211833	0.00750555
22	0.224167	0.0175594
23	0.745167	0.0135769
Fraction	DOD410/min	st.dev. DOD410nm/min
1	0.0369956	0.00169229
2	0.0362733	0.00235526
3	0.0308044	0.000762287					esterase activity			esterase activity			sacharose % (w/v)
4	0.0272711	0.003472					PlbF			EV
5	0.02314	0.00134983				Fraktion	DOD410nm/120s	DOD410nm/min	st.dev. DOD410/min	DOD410nm/10min	DOD410nm/min	st.dev. DOD410/min	PlbF	EV	PlbF	EV
6	0.02222	0.00109095				1	0.5555	0.27775	0.0417193	0.362733	0.0362733	0.00235526	64.9	63.9	0.649	0.639
7	0.0228822	0.00161334				3	0.5805	0.29025	0.031749	0.308044	0.0308044	0.000762287	62.4	61.7	0.624	0.617
8	0.02224	0.00211251				4	0.3515	0.17575	0.0531766	0.272711	0.0272711	0.003472	61.1	60.1	0.611	0.601
9	0.0217733	0.0013655				5	0.6375	0.31875	0.0304056	0.2314	0.02314	0.00134983	60.1	58.2	0.601	0.582
10	0.0205267	0.000895669				7	0.6785	0.33925	0.00494975	0.228822	0.0228822	0.00161334	58.1	55.3	0.581	0.553
11	0.0164222	0.00217706				9	1.67317	0.836583	0.0928659	0.217733	0.0217733	0.0013655	55.6	51.4	0.556	0.514
12	0.0126622	0.00156265				11	2.1615	1.08075	0.154561	0.164222	0.0164222	0.00217706	52.2	48.5	0.522	0.485
13	0.00884444	0.000647468				13	1.8945	0.94725	0.0622254	0.0884444	0.00884444	0.000647468	49	43.9	0.49	0.439
14	0.00501556	0.000312789				15	1.3595	0.67975	0.0927591	0.0367333	0.00367333	0.000218581	46.4	40.4	0.464	0.404
15	0.00367333	0.000218581				17	1.04	0.52	0.0406586	0.0409333	0.00409333	0.000194251	42.8	36.3	0.428	0.363
16	0.00345333	6.66667e-05				19	0.3365	0.16825	0.0132288	0.0863333	0.00863333	0.000414782	39.9	37.8	0.399	0.378
17	0.00409333	0.000194251				21	0.211833	0.105917	0.00375278	0.065	0.0065	0.000414782	35.8	34.8	0.358	0.348
18	0.00324444	0.000340348
19	0.00863333	0.000414782

## Sheet: EV original data
Zeit Beginn 15:00 (900 sec)
	1	2	3	4	5	6	7	8	9	10	11	12
A	0.9251	0.7926	0.861	0.481	0.5066	0.5047	0.2285	0.2368	0.2325	0.0493	0.0547	0.0494		0.9251	0.7926	0.861	0.481	0.5066	0.5047	0.2285	0.2368	0.2325	0.0493	0.0547	0.0494
B	0.7968	0.794	0.815	0.4738	0.4863	0.5316	0.2243	0.2265	0.2258	0.0491	0.0494	0.0492		0.7968	0.794	0.815	0.4738	0.4863	0.5316	0.2243	0.2265	0.2258	0.0491	0.0494	0.0492
C	0.7386	0.7359	0.768	0.4303	0.4592	0.4376	0.2984	0.3043	0.3161	0.0495	0.0495	0.0493		0.7386	0.7359	0.768	0.4303	0.4592	0.4376	0.2984	0.3043	0.3161	0.0495	0.0495	0.0493
D	0.7476	0.6424	0.6246	0.3895	0.3381	0.3935	0.1929	0.2006	0.1949	0.0493	0.0494	0.0493		0.7476	0.6424	0.6246	0.3895	0.3381	0.3935	0.1929	0.2006	0.1949	0.0493	0.0494	0.0493
E	0.7041	0.6554	0.5815	0.3305	0.3349	0.3414	0.2128	0.2199	0.2335	0.0492	0.0503	0.0494		0.7041	0.6554	0.5815	0.3305	0.3349	0.3414	0.2128	0.2199	0.2335	0.0492	0.0503	0.0494
F	0.6792	0.6543	0.6587	0.2724	0.2766	0.2718	0.2081	0.1904	0.2056	0.0494	0.0495	0.0495		0.6792	0.6543	0.6587	0.2724	0.2766	0.2718	0.2081	0.1904	0.2056	0.0494	0.0495	0.0495
G	0.6228	0.6599	0.5015	0.2428	0.2417	0.243	0.1994	0.2006	0.1993	0.0497	0.0497	0.0513		0.6228	0.6599	0.5015	0.2428	0.2417	0.243	0.1994	0.2006	0.1993	0.0497	0.0497	0.0513
H	0.564	0.5402	0.5511	0.2388	0.2355	0.2276	0.1897	0.1963	0.1874	0.0718	0.049	0.0491		0.564	0.5402	0.5511	0.2388	0.2355	0.2276	0.1897	0.1963	0.1874	0.0718	0.049	0.0491
Zeit Ende 30:00 (1800 Sec)														1.4905	1.3608	1.4717	0.8114	0.8653	0.8749	0.3139	0.324	0.3236	0.0494	0.0547	0.0495
	1	2	3	4	5	6	7	8	9	10	11	12		1.3521	1.3395	1.426	0.7987	0.8302	0.7874	0.2992	0.2967	0.3062	0.0491	0.0494	0.0489
A	1.4905	1.3608	1.4717	0.8114	0.8653	0.8749	0.3139	0.324	0.3236	0.0494	0.0547	0.0495		1.214	1.2302	1.264	0.7001	0.7661	0.6794	0.4495	0.4582	0.4791	0.0495	0.0494	0.0492
B	1.3521	1.3395	1.426	0.7987	0.8302	0.7874	0.2992	0.2967	0.3062	0.0491	0.0494	0.0489		1.2335	1.0243	1.0635	0.6083	0.53	0.6321	0.2189	0.2344	0.2264	0.0495	0.0494	0.0494
C	1.214	1.2302	1.264	0.7001	0.7661	0.6794	0.4495	0.4582	0.4791	0.0495	0.0494	0.0492		1.0947	1.0344	0.9327	0.4927	0.5019	0.4897	0.2346	0.2381	0.2631	0.0494	0.0503	0.0493
D	1.2335	1.0243	1.0635	0.6083	0.53	0.6321	0.2189	0.2344	0.2264	0.0495	0.0494	0.0494		1.0577	1.0024	1.0115	0.3704	0.3836	0.372	0.207	0.216	0.2179	0.0495	0.0495	0.0495
E	1.0947	1.0344	0.9327	0.4927	0.5019	0.4897	0.2346	0.2381	0.2631	0.0494	0.0503	0.0493		0.9926	1.0538	0.847	0.3209	0.3238	0.3276	0.209	0.2167	0.2177	0.0499	0.0498	0.0515
F	1.0577	1.0024	1.0115	0.3704	0.3836	0.372	0.207	0.216	0.2179	0.0495	0.0495	0.0495		0.9327	0.8652	0.9377	0.3171	0.3148	0.3049	0.2139	0.2173	0.2133	0.0719	0.0492	0.0489
G	0.9926	1.0538	0.847	0.3209	0.3238	0.3276	0.209	0.2167	0.2177	0.0499	0.0498	0.0515
H	0.9327	0.8652	0.9377	0.3171	0.3148	0.3049	0.2139	0.2173	0.2133	0.0719	0.0492	0.0489
Differenz														Differenz
	1	2	3	4	5	6	7	8	9	10	11	12			1	2	3	4	5	6	7	8	9	10	11	12
A	0.5654	0.5682	0.6107	0.3304	0.3587	0.3702	0.0854	0.0872	0.0911	0.0001	0	0.0001		A	0.5654	0.5682	0.6107	0.3304	0.3587	0.3702	0.0854	0.0872	0.0911	0.0001	0	0.0001
B	0.5553	0.5455	0.611	0.3249	0.3439	0.2558	0.0749	0.0702	0.0804	0	0	-0.0003		B	0.5553	0.5455	0.611	0.3249	0.3439		0.0749	0.0702	0.0804	0	0	-0.0003
C	0.4754	0.4943	0.496	0.2698	0.3069	0.2418	0.1511	0.1539	0.163	0	-0.0001	-0.0001		C	0.4754	0.4943	0.496	0.2698	0.3069	0.2418	0.1511	0.1539	0.163	0	-0.0001	-0.0001
D	0.4859	0.3819	0.4389	0.2188	0.1919	0.2386	0.026	0.0338	0.0315	0.0002	0	0.0001		D	0.4859	0.3819	0.4389	0.2188	0.1919	0.2386	0.026	0.0338	0.0315	0.0002	0	0.0001
E	0.3906	0.379	0.3512	0.1622	0.167	0.1483	0.0218	0.0182	0.0296	0.0002	0	-0.0001		E	0.3906	0.379	0.3512	0.1622	0.167	0.1483	0.0218	0.0182	0.0296	0.0002	0	-0.0001
F	0.3785	0.3481	0.3528	0.098	0.107	0.1002	-0.0011	0.0256	0.0123	0.0001	0	0		F	0.3785	0.3481	0.3528	0.098	0.107	0.1002	-0.0011	0.0256	0.0123	0.0001	0	0
G	0.3698	0.3939	0.3455	0.0781	0.0821	0.0846	0.0096	0.0161	0.0184	0.0002	0.0001	0.0002		G	0.3698	0.3939	0.3455	0.0781	0.0821	0.0846	0.0096	0.0161	0.0184	0.0002	0.0001	0.0002
H	0.3687	0.325	0.3866	0.0783	0.0793	0.0773	0.0242	0.021	0.0259	0.0001	0.0002	-0.0002		H	0.3687	0.325	0.3866	0.0783	0.0793	0.0773	0.0242	0.021	0.0259	0.0001	0.0002	-0.0002
Mittelwerte														Mittelwerte
	1	2	3	4	5	6	7	8	9	10	11	12			1	2	3	4	5	6	7	8	9	10	11	12
A		0.581433			0.3531			0.0879			6.66667e-05			A		0.0253843			0.0204824			0.00291376			6.66667e-05
B		0.5706			0.3344			0.0751667			-0.0001			B		0.0353289			0.013435			0.00510523			-0.0001
C		0.488567			0.272833			0.156			-6.66667e-05			C		0.0114343			0.0326558			0.00622174			-6.66667e-05
D		0.435567			0.216433			0.0304333			0.0001			D		0.0520801			0.0234398			0.00400791			0.0001
E		0.3736			0.159167			0.0232			3.33333e-05			E		0.0202475			0.00971202			0.00582752			3.33333e-05
F		0.3598			0.101733			0.0122667			3.33333e-05			F		0.0163643			0.00469184			0.01335			3.33333e-05
G		0.369733			0.0816			0.0147			0.000166667			G		0.0242001			0.00327872			0.00456399			0.000166667
H		0.3601			0.0783			0.0237			3.33333e-05			H		0.0316877			0.001			0.00248797			3.33333e-05
Blank 38	0.03
Blank 65	0.023
Mittelwert	0.0265
Final
	1 bis 3	4 bis 6	7 bis 9	10 bis 12
A	0.554933	0.3266	0.0614	-0.0264333
B	0.5441	0.3079	0.0486667	-0.0266
C	0.462067	0.246333	0.1295	-0.0265667
D	0.409067	0.189933	0.00393333	-0.0264
E	0.3471	0.132667	-0.0033	-0.0264667
F	0.3333	0.0752333	-0.0142333	-0.0264667
G	0.343233	0.0551	-0.0118	-0.0263333
H	0.3336	0.0518	-0.0028	-0.0264667
Fraction	DOD410/15min	well	DOD410/min	st.dev. DOD410nm/15min	st.dev. DOD410nm/min
1	0.554933	A 1-3	0.0369956	0.0253843	0.00169229
2	0.5441	B 1-3	0.0362733	0.0353289	0.00235526
3	0.462067	C 1-3	0.0308044	0.0114343	0.000762287
4	0.409067	D 1-3	0.0272711	0.0520801	0.003472
5	0.3471	E 1-3	0.02314	0.0202475	0.00134983
6	0.3333	F 1-3	0.02222	0.0163643	0.00109095
7	0.343233	G 1-3	0.0228822	0.0242001	0.00161334
8	0.3336	H 1-3	0.02224	0.0316877	0.00211251
9	0.3266	A 4-6	0.0217733	0.0204824	0.0013655
10	0.3079	B 4-6	0.0205267	0.013435	0.000895669
11	0.246333	C 4-6	0.0164222	0.0326558	0.00217706
12	0.189933	D 4-6	0.0126622	0.0234398	0.00156265
13	0.132667	E 4-6	0.00884444	0.00971202	0.000647468
14	0.0752333	F 4-6	0.00501556	0.00469184	0.000312789
15	0.0551	G 4-6	0.00367333	0.00327872	0.000218581
16	0.0518	H 4-6	0.00345333	0.001	6.66667e-05
17	0.0614	A 7-9	0.00409333	0.00291376	0.000194251
18	0.0486667	B 7-9	0.00324444	0.00510523	0.000340348
19	0.1295	C 7-9	0.00863333	0.00622174	0.000414782
