# Supplementary material for: Structural, mechanistic, and physiological insights into phospholipase A-mediated membrane phospholipid degradation in Pseudomonas aeruginosa
Source: eLife. 2022 May 10;11:e72824. doi: 10.7554/eLife.72824 (PMC9132575; doi:10.7554/eLife.72824)
Supplement: Figure 2—figure supplement 1—source data 1. [file elife-72824-fig2-figsupp1-data1.xlsx]

## Sheet: PlaF sn1 sn2
C15			C18:1, Δ-9
Abundance	c [µM]	Abundance	c [µM]	Abundance
2580788	40.0408	2743947	40.8699	2842641
2520181	40.0408	2714058	40.8699	2759082
4947032	80.0815	5283011	81.7398	5819974
5846288	80.0815	6241683	81.7398	6865322
12131342	160.163	12944246	163.48	14669772
12337344	160.163	13159036	163.48	15036623
24446585	320.326	25969990	326.959	30379904
24674256	320.326	26307756	326.959	30916719
	TIC: 220105_1_PlaF_PG_15-0_18-1_12.D\data.ms								TIC: 220105_11_PlaF_PG_15-0_18-1_33.D\data.ms
	1_PlaF_PG_15-0_18-1_12								11_PlaF_PG_15-0_18-1_33								1_PlaF_PG_15-0_18-1
	Peak #	Ret Time	Type	Width	Area	Start Time	End Time		Peak #	Ret Time	Type	Width	Area	Start Time	End Time		FA	Aavrg	c [µM]
C15	1	7.62	BB	0.028	8689636	7.56	7.673		1	7.621	BB	0.029	8655112	7.56	7.673		C15	8672374	111.512
C16	2	8.511	BB	0.03	17090125	8.435	8.594		3	8.512	BB	0.03	16689385	8.435	8.606
C18	3	10.633	BB	0.038	11926913	10.561	10.751		4	10.634	BB	0.038	12297722	10.527	10.742
C18:1, Δ-9	4	11.04	BB	0.039	12243641	10.958	11.121		5	11.041	BB	0.039	12673591	10.958	11.115		C18:1, cis-Δ9	12458616	137.315
	TIC: 220105_11_PlaF_PG_15-0_18-1_32.D\data.ms								TIC: 220105_7_Blank_PG_15-0_18-1_25.D\data.ms
	11_PlaF_PG_15-0_18-1_32								7_Blank_PG_15-0_18-1_25								11_PlaF_PG_15-0_18-1/No. 2
	Peak #	Ret Time	Type	Width	Area	Start Time	End Time		Peak #	Ret Time	Type	Width	Area	Start Time	End Time		FA	Aavrg	c [µM]
C15	1	7.625	BB	0.028	7353901	7.57	7.678		1	7.625	BB	0.028	7422187	7.564	7.678		C15	7388044	96.2324
C16	3	8.516	BB	0.031	14598921	8.469	8.691		3	8.516	BB	0.031	14741334	8.468	8.652
C18	4	10.641	BB	0.038	10401194	10.561	10.742		4	10.641	BB	0.039	10458830	10.556	10.735
C18:1, Δ-9	5	11.047	BB	0.039	9945063	10.963	11.12		5	11.048	BB	0.039	9958591	10.919	11.119		C18:1, cis-Δ9	9951827	111.739
	TIC: 220105_7_Blank_PG_15-0_18-1_24.D\data.ms								TIC: 220105_8_Blank_PG_15-0_18-1_27.D\data.ms
	7_Blank_PG_15-0_18-1_24								8_Blank_PG_15-0_18-1_27								7_Blank_PG_15-0_18-1/No.1
	Peak #	Ret Time	Type	Width	Area	Start Time	End Time		Peak #	Ret Time	Type	Width	Area	Start Time	End Time		FA	Aavrg	c [µM]
C15	1	7.623	BB	0.029	6899266	7.56	7.676		1	7.624	BB	0.028	7007686	7.56	7.673		C15	6953476	91.0624
C16	2	8.515	BB	0.029	15170265	8.439	8.625		3	8.515	BB	0.031	16330239	8.468	8.689
C18	3	10.638	BB	0.038	10912740	10.547	10.726		4	10.638	BB	0.038	10934083	10.537	10.744
C18:1, Δ-9	4	11.044	BB	0.039	9890505	10.953	11.121		5	11.045	BB	0.04	9920652	10.909	11.118		C18:1, cis-Δ9	9.90558e+06	111.267
	TIC: 220105_8_Blank_PG_15-0_18-1_26.D\data.ms
	8_Blank_PG_15-0_18-1_26																8_Blank_PG_15-0_18-1/No.2
	Peak #	Ret Time	Type	Width	Area	Start Time				Ret Time	Type	Width	Area	Start Time	End Time		FA	Aavrg	c [µM]
C15	1	7.624	BB	0.028	9119978	7.531				7.624	BB	0.028	8963377	7.565	7.677		C15	9.04168e+06	115.905
C16	3	8.517	BB	0.03	22053037	8.439				8.517	BB	0.031	23114938	8.468	8.696
C18	4	10.641	BB	0.038	15060016	10.537				10.641	BB	0.038	14865614	10.547	10.722
C18:1, Δ-9	5	11.047	BB	0.04	13671891	10.948				11.047	BB	0.04	13517258	10.929	11.122		C18:1, cis-Δ9	1.35946e+07	148.904
1_PlaF_PG_15-0_18-1
FA	Abundance	c [µM]
C15	8672374	111.512			PlaF			Blank				µM
C18:1, cis-Δ9	12458616	137.315		C15 [µM]	103.872	±	10.8041	103.484	±	17.5664		0.388216
11_PlaF_PG_15-0_18-1/No. 2				C18:1 cis-Δ9 [µM]	124.527	±	18.085	130.086	±	26.614		-5.55901
C15	7388044	96.2324
C18:1, cis-Δ9	9951827	111.739
7_Blank_PG_15-0_18-1/No.1
C15	6953476	91.0624
C18:1, cis-Δ9	9.90558e+06	111.267
8_Blank_PG_15-0_18-1/No.2
C15	9.04168e+06	115.905
C18:1, cis-Δ9	1.35946e+07	148.904
