# Supplementary material for: Structural, mechanistic, and physiological insights into phospholipase A-mediated membrane phospholipid degradation in Pseudomonas aeruginosa
Source: eLife. 2022 May 10;11:e72824. doi: 10.7554/eLife.72824 (PMC9132575; doi:10.7554/eLife.72824)
Supplement: Figure 2—figure supplement 2—source data 1. [file elife-72824-fig2-figsupp2-data1.xlsx]

## Sheet: Figure S2
																								PlbF-manuscript --> ohne 11. und 12. Stunde
										OD580 of 1,0 = 8 x 10^8 cells/ml
																												Standardabweichung
		Zeit (h)	wt #1	wt #2	wt #3	Δplbf #1	Δplbf #2	Δplbf #3	Zeit (h)	wt #1	wt #2	wt #3	Δplaf #1	Δplaf #2	Δplaf #3									Zeit (h)	WT	ΔplaF		WT	ΔplaF
		0	0.05	0.05	0.05	0.05	0.05	0.05	0	40000000	40000000	40000000	40000000	40000000	40000000									0	40000000	40000000		0	0
		1	0.075	0.076	0.075	0.055	0.054	0.058	1	60000000	60800000	60000000	44000000	43200000	46400000									1	6.02667e+07	4.45333e+07		461880	1.66533e+06
		2	0.199	0.199	0.192	0.11	0.11	0.133	2	159200000	159200000	153600000	88000000	88000000	106400000									2	1.57333e+08	9.41333e+07		3.23316e+06	1.06232e+07		2.84522e-09	4.33526e-09
		3	0.61	0.666	0.632	0.406	0.366	0.446	3	488000000	532800000	505600000	324800000	292800000	356800000									3	508800000	324800000		2.25708e+07	32000000
		4	1.52	1.63	1.51	1.24	1.33	1.4	4	1216000000	1304000000	1208000000	992000000	1064000000	1120000000									4	1.24267e+09	1.05867e+09		5.32666e+07	6.41665e+07
		5	2.02	2	2.01	1.89	1.91	1.99	5	1616000000	1600000000	1.608e+09	1512000000	1528000000	1592000000									5	1608000000	1544000000		8000000	4.2332e+07
		6	2.03	1.98	2.1	1.96	2.19	2.2	6	1.624e+09	1584000000	1680000000	1568000000	1752000000	1.76e+09									6	1.62933e+09	1.69333e+09		4.82217e+07	1.08616e+08
		7	2.48	2.51	2.49	2.44	2.61	2.87	7	1984000000	2.008e+09	1.992e+09	1952000000	2088000000	2296000000									7	1.99467e+09	2112000000		1.22202e+07	1.73251e+08
		8	2.66	2.78	2.66	2.72	2.74	2.84	8	2128000000	2224000000	2128000000	2176000000	2192000000	2272000000									8	2160000000	2.21333e+09		5.54256e+07	5.14328e+07
		9	3.03	3	2.81	2.96	2.99	3.06	9	2424000000	2400000000	2248000000	2368000000	2392000000	2448000000									9	2.35733e+09	2.40267e+09		9.54428e+07	4.10528e+07
		10	3.43	3.26	3.1	3.36	3.41	3.38	10	2744000000	2608000000	2480000000	2688000000	2728000000	2704000000									10	2.61067e+09	2.70667e+09		1.3202e+08	2.01329e+07
		11	3.88	3.73	3.58	4	4.17	4.07	11	3104000000	2984000000	2864000000	3200000000	3336000000	3256000000									13	3.22133e+09	3.21867e+09		1.85271e+08	4.02658e+07
		12	3.8	3.49	4.14	3.76	3.77	3.93	12	3040000000	2792000000	3.312e+09	3008000000	3016000000	3144000000									14	3.25067e+09	3.26933e+09		2.45319e+08	2.80951e+07
		13	4.22	3.77	4.09	3.97	4.07	4.03	13	3376000000	3016000000	3272000000	3176000000	3256000000	3224000000									15	3376000000	3456000000		2.35695e+08	5.76888e+07
		14	4.22	3.71	4.26	4.05	4.09	4.12	14	3376000000	2968000000	3408000000	3240000000	3272000000	3296000000									16	3432000000	3.62667e+09		2.22279e+08	1.15747e+08
		15	4.4	3.88	4.38	4.3	4.4	4.26	15	3.52e+09	3104000000	3504000000	3440000000	3.52e+09	3408000000									17	3.42933e+09	3.56267e+09		2.68963e+08	3.6074e+07
		16	4.43	3.97	4.47	4.44	4.7	4.46	16	3544000000	3176000000	3576000000	3.552e+09	3760000000	3568000000									18	3424000000	3648000000		2.93721e+08	8000000
		17	4.51	3.9	4.45	4.41	4.5	4.45	17	3608000000	3120000000	3560000000	3528000000	3600000000	3560000000									19	3.49333e+09	3608000000		3.84361e+08	16000000
		18	4.44	3.86	4.54	4.57	4.56	4.55	18	3.552e+09	3088000000	3632000000	3656000000	3.648e+09	3640000000									20	3376000000	3.69067e+09		2.88444e+08	2.44404e+07
		19	4.45	3.85	4.8	4.49	4.53	4.51	19	3560000000	3080000000	3840000000	3592000000	3624000000	3608000000									21	3.25067e+09	3608000000		3.5203e+08	32000000
		20	4.32	3.82	4.52	4.64	4.58	4.62	20	3456000000	3056000000	3.616e+09	3.712e+09	3664000000	3696000000									22	3264000000	3544000000		3.71892e+08	8.4664e+07
		21	4.07	3.62	4.5	4.51	4.47	4.55	21	3256000000	2896000000	3600000000	3608000000	3576000000	3640000000									23	3344000000	3304000000		3.40071e+08	8.35225e+07
		22	4.19	3.57	4.48	4.39	4.35	4.55	22	3.352e+09	2856000000	3.584e+09	3.512e+09	3.48e+09	3640000000									24	3.37067e+09	3.50133e+09		4.41404e+08	1.37249e+08
		23	4.4	3.69	4.45	4.2	4.01	4.18	23	3.52e+09	2952000000	3560000000	3360000000	3208000000	3344000000
		24	4.47	3.58	4.59	4.35	4.22	4.56	24	3576000000	2864000000	3672000000	3.48e+09	3376000000	3.648e+09
		23	4.58	4.54	4.56	4.61	4.64	4.78	23	3664000000	3632000000	3.648e+09	3.688e+09	3.712e+09	3824000000
		24	4.57	4.65	4.53	4.56	4.58	4.75	24	3656000000	3.72e+09	3624000000	3.648e+09	3664000000	3800000000
