# Supplementary material for: Structural, mechanistic, and physiological insights into phospholipase A-mediated membrane phospholipid degradation in Pseudomonas aeruginosa
Source: eLife. 2022 May 10;11:e72824. doi: 10.7554/eLife.72824 (PMC9132575; doi:10.7554/eLife.72824)
Supplement: Figure 2—source data 1. [file elife-72824-fig2-data1.xlsx]

## Sheet: Figure 2a
Application: Tecan i-control				Tecan i-control , 1.11.1.0
Device: infinite M1000Pro				Serial number: 1403008863
Firmware: V_1.05_11/2011_S3LCE_ALPHA (Nov 3 2011/09.27.24)				MAI, V_1.05_11/2011_S3LCE_ALPHA (Nov 3 2011/09.27.24)
Date:	08.07.2016
Time:	10:37:44
System				IET074
User				IBT\weihmann
Plate				Thermo Fisher Scientific-Nunclon 96 Flat Bottom Black Polystyrene Catalog No.: 137101/137103/237105/237107/237108/437111/437112 [NUN96fb.pdfx]
Plate-ID (Stacker)
Shaking (Linear) Duration:				7	s
Shaking (Linear) Amplitude:				2	mm
Shaking (Linear) Frequency:				654	rpm
Wait (Plate)				On	Target Temperature: 25 °C
List of actions in this measurement script:
Kinetic
Fluorescence
Label: Label1
Kinetic Measurement
Kinetic duration				00:45:00
Interval Time				00:00:15
Mode				Fluorescence Top Reading
Excitation Wavelength				490	nm
Emission Wavelength				515	nm
Excitation Bandwidth				5	nm
Emission Bandwidth				5	nm
Gain				100	Manual			A2 pos. Control = PLA2 from Naja mocambique mocambique					13.76	U/mg
Number of Flashes				50
Flash Frequency				400	Hz
Integration Time				20	µs
Lag Time				0	µs
Settle Time				0	ms
Z-Position (Manual)				20000	µm
Part of Plate				A1-H3
Start Time:	08.07.2016 10:38:02
Cycle Nr.	1	2	3	4	5	6	7	8	9	10	11	12	13	14	15	16	17	18	19	20	21	22	23	24	25	26	27	28	29	30	31	32	33	34	35	36	37	38	39	40	41	42	43	44	45	46	47	48	49
Time [s]	0	15	30	45	60	75	90	105	120	135	150	165	180	195	210	225	240	255	270	285	300	315	330	345	360	375	390	405	420	435	450	465	480	495	510	525	540	555	570	585	600	615	630	645	660	675	690	705	720
Temp. [°C]	27	27.2	27.2	27.1	27.1	27.2	27.2	27.2	27.1	27.1	27.1	27.1	27.2	27.2	27.2	27.1	27.1	27.2	27.2	27.2	27.3	27.3	27.3	27.3	27.2	27.3	27.2	27.3	27.3	27.3	27.2	27.3	27.3	27.3	27.2	27.3	27.3	27.3	27.3	27.3	27.3	27.3	27.3	27.3	27.3	27.3	27.3	27.3	27.3
A1	990	985	973	984	992	988	990	993	994	991	1013	1008	1008	1010	1015	1015	1012	1013	1010	1023	1016	1015	1008	1014	1020	1021	1020	1013	1022	1025	1025	1021	1023	1026	1022	1023	1021	1031	1026	1020	1034	1036	1029	1024	1039	1038	1035	1029	1032
A2	178	181	177	180	180	180	182	183	180	179	187	180	183	188	185	184	186	190	183	185	189	185	188	186	187	188	187	189	186	186	188	185	186	188	189	184	189	190	185	191	187	186	190	189	187	187	189	189	186
A3	1543	1554	1537	1542	1528	1529	1545	1535	1530	1541	1540	1546	1545	1532	1538	1540	1536	1530	1523	1521	1529	1530	1521	1531	1529	1528	1528	1532	1534	1520	1524	1523	1527	1524	1523	1528	1509	1524	1533	1527	1527	1516	1534	1523	1517	1514	1520	1528	1521
B1	1203	1213	1185	1176	1180	1189	1185	1188	1188	1198	1195	1194	1191	1196	1188	1193	1192	1194	1186	1189	1187	1183	1179	1190	1176	1184	1179	1181	1186	1179	1191	1189	1186	1183	1182	1190	1190	1187	1188	1191	1193	1196	1193	1197	1197	1192	1192	1190	1193
B2	192	195	188	190	194	194	196	191	197	198	198	200	200	198	202	196	205	205	201	205	206	201	206	203	209	203	204	207	205	205	207	209	209	206	210	206	206	209	207	208	209	210	207	212	209	210	208	212	215
B3	1877	1827	1774	1760	1762	1747	1735	1737	1742	1751	1765	1743	1734	1751	1731	1742	1736	1742	1727	1741	1734	1732	1728	1736	1733	1716	1737	1721	1739	1739	1735	1742	1731	1728	1734	1740	1730	1736	1742	1725	1726	1726	1734	1721	1727	1717	1719	1737	1717
C1	2477	2518	2570	2600	2635	2687	2725	2745	2766	2817	2824	2846	2891	2920	2943	2959	2990	3003	3029	3058	3071	3083	3118	3148	3161	3186	3195	3232	3253	3261	3289	3327	3343	3339	3378	3381	3403	3431	3448	3489	3495	3506	3526	3534	3568	3608	3622	3630	3644
C2	267	268	269	269	265	270	272	264	269	267	267	269	268	271	270	269	268	269	269	265	269	268	269	266	270	267	270	270	267	267	271	269	265	266	266	269	267	269	269	266	266	265	269	266	270	265	265	269	269
C3	1959	1959	1948	1953	1940	1927	1931	1928	1933	1944	1943	1943	1936	1942	1935	1935	1937	1933	1925	1936	1926	1932	1930	1936	1924	1934	1920	1928	1929	1926	1924	1923	1917	1927	1927	1932	1922	1933	1919	1929	1927	1930	1929	1925	1924	1928	1923	1924	1936
D1	2404	2423	2474	2521	2549	2568	2598	2640	2673	2694	2746	2754	2781	2818	2829	2863	2880	2914	2928	2953	2983	2994	3021	3044	3052	3096	3127	3128	3161	3183	3194	3227	3239	3268	3271	3308	3305	3336	3365	3368	3413	3431	3443	3466	3489	3500	3522	3545	3573
D2	284	276	273	276	274	275	275	275	271	276	280	274	273	277	275	273	279	277	275	276	277	277	273	274	273	275	279	274	274	278	275	274	274	275	276	280	279	277	273	280	274	277	276	275	280	276	284	277	277
D3	2037	2037	2056	2048	2051	2035	2033	2053	2038	2036	2059	2039	2034	2039	2041	2050	2040	2035	2034	2022	2038	2044	2030	2025	2034	2030	2030	2026	2036	2020	2033	2023	2027	2026	2025	2023	2027	2021	2027	2030	2034	2042	2030	2032	2029	2030	2028	2040	2039
E1	2158	2205	2247	2263	2294	2328	2362	2386	2411	2449	2472	2491	2517	2533	2566	2566	2604	2621	2636	2659	2665	2701	2712	2742	2754	2774	2778	2809	2833	2842	2853	2885	2910	2916	2943	2944	2974	2987	2998	3021	3021	3054	3088	3089	3092	3116	3125	3144	3171
E2	289	289	288	294	289	292	295	291	294	292	286	288	289	290	286	290	286	291	285	285	290	283	286	290	288	287	289	284	287	288	290	291	284	290	286	285	291	285	288	290	287	286	284	284	288	291	288	288	289
E3	1973	1999	1998	2010	1998	2010	2010	2006	2015	2009	2016	2019	2012	2016	2019	2006	2009	2003	2006	2003	1999	2010	2003	2001	2019	2014	2003	2003	1994	2013	2002	1999	2009	2001	2004	2000	2012	2014	2003	2022	1994	2006	2003	1988	2000	2011	1995	2004	1992
F1	859	964	1076	1203	1331	1414	1496	1555	1628	1716	1781	1864	1947	2030	2101	2190	2238	2306	2369	2434	2480	2526	2558	2621	2659	2710	2743	2790	2823	2858	2907	2945	2956	2992	3024	3064	3065	3103	3140	3156	3175	3213	3231	3228	3279	3278	3318	3322	3347
F2	1138	1445	1714	1977	2193	2425	2690	2923	3155	3378	3559	3730	3908	4074	4205	4335	4455	4588	4702	4838	4892	4994	5090	5175	5277	5348	5421	5490	5552	5614	5661	5714	5773	5836	5890	5904	5928	5998	6011	6041	6057	6081	6129	6128	6173	6175	6209	6238	6240
F3	7311	7843	8204	8582	8931	9178	9446	9631	9774	10004	10197	10437	10718	10912	11130	11333	11469	11602	11729	11951	12061	12182	12293	12444	12546	12693	12783	12948	13106	13192	13302	13474	13547	13672	13831	13888	13974	14096	14173	14257	14446	14442	14587	14606	14879	14841	14911	15062	15072
G1	913	1065	1221	1342	1445	1567	1703	1813	1945	2067	2181	2257	2341	2393	2443	2513	2553	2609	2679	2756	2839	2876	2951	3004	3073	3117	3180	3213	3258	3306	3339	3372	3423	3456	3478	3531	3565	3608	3624	3663	3708	3733	3765	3789	3816	3856	3882	3936	3944
G2	1106	1458	1797	2042	2225	2449	2700	2957	3176	3401	3600	3771	3918	4036	4156	4298	4396	4495	4628	4709	4829	4881	4979	5063	5151	5178	5275	5345	5405	5468	5483	5560	5623	5673	5683	5747	5784	5808	5835	5844	5911	5930	5934	5973	5984	6027	6040	6081	6055
G3	7065	7650	8176	8565	8917	9259	9512	9805	9928	10119	10331	10539	10763	11001	11181	11460	11661	11798	11962	12124	12273	12346	12461	12611	12771	12909	13052	13135	13314	13445	13565	13671	13800	13934	14020	14137	14269	14407	14465	14602	14690	14801	14906	15009	15047	15211	15309	15385	15452
H1	688	795	907	1007	1089	1169	1236	1310	1390	1464	1528	1597	1669	1745	1825	1893	1967	2050	2103	2176	2239	2304	2380	2434	2496	2558	2602	2650	2717	2748	2796	2835	2887	2928	2980	3024	3071	3112	3130	3177	3220	3262	3288	3312	3354	3420	3447	3443	3485
H2	1054	1395	1741	2033	2266	2414	2555	2736	2945	3213	3419	3601	3753	3901	4028	4150	4285	4397	4478	4590	4673	4762	4841	4929	5034	5091	5153	5216	5286	5313	5395	5412	5485	5504	5545	5627	5648	5702	5699	5749	5783	5840	5835	5861	5865	5947	5941	5923	5959
H3	7745	8307	8619	9156	9511	9801	10069	10287	10445	10677	10780	10955	11163	11370	11548	11736	11941	12050	12154	12308	12447	12560	12619	12724	12884	13012	13034	13157	13263	13353	13504	13536	13667	13738	13865	13914	14036	14151	14247	14254	14414	14538	14602	14645	14762	14912	15019	14927	15087
End Time:	08.07.2016 11:23:10
Time [s]	Blank A1	Blank A1	PlbF A1	PlbF A1	PlbF A1	pos.K. A1	pos.K. A1	pos.K.A1	Blank A2	Blank A2	PlbF A2	PlbF A2	PlbF A2	pos.K. A2	pos.K. A2	pos.K. A2	Blank A2*	Blank A2*	PlbF A2*	PlbF A2*	PlbF A2*	pos.K. A2*	pos.K. A2*	pos.K. A2*
0	990	1203	2477	2404	2158	859	913	688	178	192	267	284	289	1138	1106	1054	1543	1877	1959	2037	1973	7311	7065	7745
15	985	1213	2518	2423	2205	964	1065	795	181	195	268	276	289	1445	1458	1395	1554	1827	1959	2037	1999	7843	7650	8307
30	973	1185	2570	2474	2247	1076	1221	907	177	188	269	273	288	1714	1797	1741	1537	1774	1948	2056	1998	8204	8176	8619
45	984	1176	2600	2521	2263	1203	1342	1007	180	190	269	276	294	1977	2042	2033	1542	1760	1953	2048	2010	8582	8565	9156
60	992	1180	2635	2549	2294	1331	1445	1089	180	194	265	274	289	2193	2225	2266	1528	1762	1940	2051	1998	8931	8917	9511
75	988	1189	2687	2568	2328	1414	1567	1169	180	194	270	275	292	2425	2449	2414	1529	1747	1927	2035	2010	9178	9259	9801
90	990	1185	2725	2598	2362	1496	1703	1236	182	196	272	275	295	2690	2700	2555	1545	1735	1931	2033	2010	9446	9512	10069
105	993	1188	2745	2640	2386	1555	1813	1310	183	191	264	275	291	2923	2957	2736	1535	1737	1928	2053	2006	9631	9805	10287
120	994	1188	2766	2673	2411	1628	1945	1390	180	197	269	271	294	3155	3176	2945	1530	1742	1933	2038	2015	9774	9928	10445
135	991	1198	2817	2694	2449	1716	2067	1464	179	198	267	276	292	3378	3401	3213	1541	1751	1944	2036	2009	10004	10119	10677
150	1013	1195	2824	2746	2472	1781	2181	1528	187	198	267	280	286	3559	3600	3419	1540	1765	1943	2059	2016	10197	10331	10780
165	1008	1194	2846	2754	2491	1864	2257	1597	180	200	269	274	288	3730	3771	3601	1546	1743	1943	2039	2019	10437	10539	10955
180	1008	1191	2891	2781	2517	1947	2341	1669	183	200	268	273	289	3908	3918	3753	1545	1734	1936	2034	2012	10718	10763	11163
195	1010	1196	2920	2818	2533	2030	2393	1745	188	198	271	277	290	4074	4036	3901	1532	1751	1942	2039	2016	10912	11001	11370
210	1015	1188	2943	2829	2566	2101	2443	1825	185	202	270	275	286	4205	4156	4028	1538	1731	1935	2041	2019	11130	11181	11548
225	1015	1193	2959	2863	2566	2190	2513	1893	184	196	269	273	290	4335	4298	4150	1540	1742	1935	2050	2006	11333	11460	11736
240	1012	1192	2990	2880	2604	2238	2553	1967	186	205	268	279	286	4455	4396	4285	1536	1736	1937	2040	2009	11469	11661	11941
255	1013	1194	3003	2914	2621	2306	2609	2050	190	205	269	277	291	4588	4495	4397	1530	1742	1933	2035	2003	11602	11798	12050
270	1010	1186	3029	2928	2636	2369	2679	2103	183	201	269	275	285	4702	4628	4478	1523	1727	1925	2034	2006	11729	11962	12154
285	1023	1189	3058	2953	2659	2434	2756	2176	185	205	265	276	285	4838	4709	4590	1521	1741	1936	2022	2003	11951	12124	12308
300	1016	1187	3071	2983	2665	2480	2839	2239	189	206	269	277	290	4892	4829	4673	1529	1734	1926	2038	1999	12061	12273	12447
315	1015	1183	3083	2994	2701	2526	2876	2304	185	201	268	277	283	4994	4881	4762	1530	1732	1932	2044	2010	12182	12346	12560
330	1008	1179	3118	3021	2712	2558	2951	2380	188	206	269	273	286	5090	4979	4841	1521	1728	1930	2030	2003	12293	12461	12619
345	1014	1190	3148	3044	2742	2621	3004	2434	186	203	266	274	290	5175	5063	4929	1531	1736	1936	2025	2001	12444	12611	12724
360	1020	1176	3161	3052	2754	2659	3073	2496	187	209	270	273	288	5277	5151	5034	1529	1733	1924	2034	2019	12546	12771	12884
375	1021	1184	3186	3096	2774	2710	3117	2558	188	203	267	275	287	5348	5178	5091	1528	1716	1934	2030	2014	12693	12909	13012
390	1020	1179	3195	3127	2778	2743	3180	2602	187	204	270	279	289	5421	5275	5153	1528	1737	1920	2030	2003	12783	13052	13034
405	1013	1181	3232	3128	2809	2790	3213	2650	189	207	270	274	284	5490	5345	5216	1532	1721	1928	2026	2003	12948	13135	13157
420	1022	1186	3253	3161	2833	2823	3258	2717	186	205	267	274	287	5552	5405	5286	1534	1739	1929	2036	1994	13106	13314	13263
435	1025	1179	3261	3183	2842	2858	3306	2748	186	205	267	278	288	5614	5468	5313	1520	1739	1926	2020	2013	13192	13445	13353
450	1025	1191	3289	3194	2853	2907	3339	2796	188	207	271	275	290	5661	5483	5395	1524	1735	1924	2033	2002	13302	13565	13504
465	1021	1189	3327	3227	2885	2945	3372	2835	185	209	269	274	291	5714	5560	5412	1523	1742	1923	2023	1999	13474	13671	13536
480	1023	1186	3343	3239	2910	2956	3423	2887	186	209	265	274	284	5773	5623	5485	1527	1731	1917	2027	2009	13547	13800	13667
495	1026	1183	3339	3268	2916	2992	3456	2928	188	206	266	275	290	5836	5673	5504	1524	1728	1927	2026	2001	13672	13934	13738
510	1022	1182	3378	3271	2943	3024	3478	2980	189	210	266	276	286	5890	5683	5545	1523	1734	1927	2025	2004	13831	14020	13865
525	1023	1190	3381	3308	2944	3064	3531	3024	184	206	269	280	285	5904	5747	5627	1528	1740	1932	2023	2000	13888	14137	13914
540	1021	1190	3403	3305	2974	3065	3565	3071	189	206	267	279	291	5928	5784	5648	1509	1730	1922	2027	2012	13974	14269	14036
555	1031	1187	3431	3336	2987	3103	3608	3112	190	209	269	277	285	5998	5808	5702	1524	1736	1933	2021	2014	14096	14407	14151
570	1026	1188	3448	3365	2998	3140	3624	3130	185	207	269	273	288	6011	5835	5699	1533	1742	1919	2027	2003	14173	14465	14247
585	1020	1191	3489	3368	3021	3156	3663	3177	191	208	266	280	290	6041	5844	5749	1527	1725	1929	2030	2022	14257	14602	14254
600	1034	1193	3495	3413	3021	3175	3708	3220	187	209	266	274	287	6057	5911	5783	1527	1726	1927	2034	1994	14446	14690	14414
615	1036	1196	3506	3431	3054	3213	3733	3262	186	210	265	277	286	6081	5930	5840	1516	1726	1930	2042	2006	14442	14801	14538
630	1029	1193	3526	3443	3088	3231	3765	3288	190	207	269	276	284	6129	5934	5835	1534	1734	1929	2030	2003	14587	14906	14602
645	1024	1197	3534	3466	3089	3228	3789	3312	189	212	266	275	284	6128	5973	5861	1523	1721	1925	2032	1988	14606	15009	14645
660	1039	1197	3568	3489	3092	3279	3816	3354	187	209	270	280	288	6173	5984	5865	1517	1727	1924	2029	2000	14879	15047	14762
675	1038	1192	3608	3500	3116	3278	3856	3420	187	210	265	276	291	6175	6027	5947	1514	1717	1928	2030	2011	14841	15211	14912
690	1035	1192	3622	3522	3125	3318	3882	3447	189	208	265	284	288	6209	6040	5941	1520	1719	1923	2028	1995	14911	15309	15019
705	1029	1190	3630	3545	3144	3322	3936	3443	189	212	269	277	288	6238	6081	5923	1528	1737	1924	2040	2004	15062	15385	14927
720	1032	1193	3644	3573	3171	3347	3944	3485	186	215	269	277	289	6240	6055	5959	1521	1717	1936	2039	1992	15072	15452	15087
735	1033	1200	3669	3581	3203	3371	3969	3515	191	212	266	279	285	6286	6105	5965	1528	1731	1923	2038	2006	15177	15551	15162
750	1045	1194	3693	3578	3195	3395	4019	3534	189	208	269	275	290	6282	6149	5974	1523	1732	1929	2016	2006	15237	15697	15174
765	1029	1202	3698	3621	3228	3413	4037	3591	191	210	271	280	289	6321	6144	6015	1525	1732	1935	2042	2006	15363	15747	15304
780	1035	1207	3737	3630	3230	3435	4040	3614	189	212	271	280	288	6293	6146	6037	1518	1727	1922	2025	1996	15429	15742	15397
795	1038	1209	3743	3653	3264	3463	4090	3634	189	217	270	278	291	6313	6165	6026	1513	1719	1928	2030	2002	15531	15916	15438
810	1039	1208	3768	3676	3266	3452	4116	3652	191	210	268	279	292	6332	6185	6039	1533	1737	1932	2031	2011	15647	15930	15518
825	1041	1208	3795	3695	3278	3503	4139	3692	182	210	270	277	287	6351	6191	6038	1526	1734	1925	2030	1989	15710	16098	15533
840	1039	1198	3809	3713	3293	3525	4171	3718	187	209	268	278	289	6361	6205	6075	1539	1726	1932	2048	2005	15774	16123	15625
855	1035	1205	3810	3725	3324	3524	4190	3764	187	213	267	283	287	6367	6196	6121	1524	1733	1918	2019	2009	15841	16206	15813
870	1047	1203	3843	3758	3324	3561	4214	3801	189	211	268	279	291	6394	6210	6129	1527	1717	1924	2029	2007	15947	16228	15818
885	1039	1204	3873	3759	3351	3573	4243	3816	190	211	270	279	289	6375	6225	6145	1515	1732	1923	2036	1995	16003	16356	15875
900	1044	1204	3898	3786	3332	3603	4259	3835	187	211	269	277	287	6418	6217	6101	1528	1741	1920	2035	1999	16079	16418	15882
915	1032	1209	3910	3821	3398	3604	4320	3852	190	211	272	280	289	6408	6261	6138	1523	1732	1923	2033	2007	16090	16491	15950
930	1042	1205	3932	3825	3410	3608	4319	3884	188	210	266	284	290	6365	6236	6148	1537	1728	1918	2036	2001	16093	16532	16124
945	1046	1211	3945	3866	3431	3622	4365	3920	188	215	270	281	288	6414	6270	6154	1530	1734	1929	2039	1999	16163	16695	16127
960	1037	1212	3963	3864	3420	3656	4379	3939	190	217	273	280	289	6384	6282	6148	1530	1740	1923	2022	2016	16198	16720	16158
975	1052	1209	3959	3887	3466	3668	4417	3946	189	216	270	285	289	6398	6279	6164	1527	1725	1924	2031	2001	16281	16802	16208
990	1044	1225	4007	3891	3467	3667	4430	3989	189	213	266	282	292	6416	6259	6173	1510	1744	1923	2030	2004	16389	16789	16347
1005	1045	1208	4011	3929	3466	3712	4431	4013	189	215	273	283	293	6426	6276	6192	1515	1739	1919	2031	2007	16456	16862	16384
1020	1041	1213	4042	3935	3497	3723	4469	4046	192	213	274	281	289	6416	6308	6181	1519	1739	1912	2031	2012	16461	16951	16453
1035	1049	1218	3565	3966	3506	3738	4493	4064	192	215	271	281	291	6410	6285	6150	1527	1728	1930	2045	2000	16482	17080	16398
1050	1064	1217	3557	3988	3530	3755	4516	4079	190	212	271	281	291	6436	6293	6205	1533	1735	1929	2049	2008	16599	17047	16546
1065	1050	1211	3574	3977	3556	3769	4537	4102	194	212	272	283	289	6449	6318	6185	1522	1731	1922	2028	2004	16657	17150	16576
1080	1057	1211	3604	4010	3547	3788	4562	4141	189	211	270	282	292	6452	6316	6203	1530	1726	1927	2030	1995	16685	17231	16609
1095	1053	1225	3597	4036	3568	3802	4586	4149	188	217	271	285	287	6438	6336	6208	1519	1733	1921	2031	2004	16775	17307	16667
1110	1052	1228	3615	4033	3566	3821	4591	4183	191	212	272	283	286	6482	6288	6231	1528	1733	1919	2030	2009	16852	17278	16747
1125	1047	1215	3643	4085	3578	3823	4631	4225	192	214	269	286	291	6459	6322	6251	1518	1730	1918	2042	1989	16871	17402	16774
1140	1061	1227	3672	4101	3594	3844	4669	4218	189	215	271	293	292	6437	6350	6220	1531	1737	1914	2051	1995	16923	17463	16801
1155	1053	1226	3693	4110	3635	3855	4680	4258	192	215	271	290	291	6416	6349	6239	1535	1734	1923	2054	1997	16862	17476	16881
1170	1056	1220	3677	4149	3641	3886	4697	4293	190	214	273	292	296	6476	6340	6262	1531	1733	1933	2038	2014	17054	17546	16934
1185	1049	1227	3708	4135	3672	3884	4703	4291	193	211	271	290	292	6474	6332	6252	1520	1729	1931	2028	2004	17109	17575	17029
1200	1060	1229	3721	4143	3668	3895	4731	4307	188	215	270	287	292	6478	6331	6224	1537	1744	1915	2033	2001	17173	17546	16993
1215	1053	1236	3741	4178	3670	3949	4742	4351	191	214	276	295	292	6482	6331	6233	1528	1733	1932	2040	1999	17220	17673	17125
1230	1059	1227	3776	4187	3718	3945	4814	4334	194	215	271	290	291	6485	6359	6240	1523	1741	1921	2032	2015	17240	17807	17123
1245	1061	1226	3784	4207	3712	3955	4800	4375	194	215	275	293	292	6478	6352	6231	1535	1715	1922	2039	2005	17405	17813	17183
1260	1063	1237	3793	4224	3749	3946	4826	4415	187	211	277	294	291	6492	6370	6270	1526	1731	1934	2034	2015	17342	17900	17295
1275	1060	1226	3802	4222	3751	3993	4836	4452	192	215	277	295	293	6492	6371	6269	1530	1734	1927	2028	2015	17440	17902	17267
1290	1062	1235	3824	4244	3774	3988	4886	4467	190	215	272	291	291	6495	6358	6285	1529	1741	1928	2038	2006	17468	17933	17384
1305	1064	1226	3840	4283	3785	4010	4897	4471	195	215	275	295	292	6511	6379	6273	1528	1746	1910	2030	2004	17580	18023	17428
1320	1066	1235	3838	4293	3815	4035	4887	4506	190	214	276	288	295	6494	6381	6267	1531	1735	1922	2030	2008	17543	18032	17368
1335	1064	1237	3860	4328	3792	4056	4925	4509	192	218	272	294	292	6503	6374	6252	1526	1742	1929	2043	2008	17636	18081	17411
1350	1060	1240	3893	4341	3815	4050	4919	4526	171	217	277	294	287	6522	6378	6268	1527	1742	1930	2042	2005	17633	18125	17458
1365	1062	1238	3897	4359	3844	4067	4953	4566	171	216	278	296	290	6514	6401	6294	1516	1743	1924	2042	2007	17689	18158	17577
1380	1065	1242	3900	4383	3854	4078	5004	4581	174	216	275	293	292	6531	6430	6277	1533	1732	1935	2046	2012	17701	18302	17547
1395	1073	1236	3932	4384	3870	4098	4995	4613	170	218	274	293	290	6509	6373	6278	1521	1731	1931	2029	1999	17807	18359	17644
1410	1066	1230	3951	4397	3893	4131	4985	4614	173	217	274	293	293	6510	6403	6255	1531	1738	1923	2032	2002	17829	18273	17672
1425	1066	1240	3957	4423	3866	4122	5007	4625	170	219	273	293	298	6530	6392	6273	1537	1744	1928	2042	2006	17859	18351	17624
1440	1063	1244	3984	4437	3894	4142	5039	4645	173	216	274	289	291	6498	6411	6243	1524	1735	1932	2046	2005	17941	18411	17718
1455	1072	1238	4006	4470	3932	4154	5061	4685	175	218	274	293	289	6515	6403	6291	1524	1733	1918	2029	2014	17928	18434	17768
1470	1070	1238	4003	4468	3954	4164	5062	4725	172	216	272	295	296	6484	6402	6297	1525	1738	1919	2039	2008	17943	18524	17856
1485	1069	1243	4021	4477	3942	4188	5110	4718	173	218	272	291	288	6490	6372	6252	1521	1734	1930	2044	2003	18009	18518	17803
1500	1071	1248	4044	4520	3986	4236	5122	4740	174	218	273	293	295	6549	6390	6290	1530	1739	1934	2047	2002	18177	18535	17899
1515	1070	1250	4070	4526	3991	4243	5145	4801	169	216	277	292	290	6551	6411	6295	1529	1735	1827	2036	2003	18161	18651	17945
1530.1	1080	1245	4076	4555	4005	4225	5193	4801	171	216	275	292	297	6533	6442	6303	1536	1739	1824	2026	2020	18201	18732	17995
1545	1062	1235	4080	4581	4022	4237	5205	4790	174	215	275	295	290	6530	6415	6299	1522	1729	1820	2043	1998	18143	18735	17974
1560.1	1070	1241	4111	4580	4025	4264	5184	4824	171	216	278	299	291	6528	6428	6299	1540	1736	1824	2036	2010	18234	18789	18032
1575	1067	1240	4114	4624	4053	4257	5235	4857	174	216	273	301	292	6538	6424	6313	1539	1746	1813	2026	2011	18201	18813	18045
1590	1083	1248	4104	4609	4066	4287	5232	4871	176	216	276	297	296	6517	6441	6319	1533	1740	1817	2046	2007	18248	18934	18185
1605.1	1077	1247	4138	4646	4078	4294	5260	4882	175	217	273	296	298	6563	6416	6323	1526	1736	1812	2042	2007	18311	18933	18141
1620.1	1074	1248	4140	4662	4076	4319	5259	4903	173	219	273	301	295	6530	6430	6343	1538	1740	1812	2042	2005	18333	18895	18214
1635	1071	1248	4156	4679	4098	4330	5301	4909	175	220	276	300	293	6524	6444	6300	1529	1741	1819	2042	2005	18334	19115	18276
1650	1078	1248	4160	4679	4111	4334	5292	4950	177	218	274	297	295	6538	6441	6314	1532	1755	1810	2033	2004	18477	19067	18327
1665	1070	1250	4170	4693	4141	4331	5347	4966	175	220	282	297	292	6540	6432	6337	1520	1739	1814	2036	2002	18496	19049	18375
1680.1	1078	1255	4213	4747	4112	4340	5335	4977	174	221	276	299	293	6552	6434	6326	1529	1745	1818	2034	2005	18488	19049	18357
1695	1076	1251	4225	4740	4144	4367	5367	4998	174	215	274	304	292	6552	6447	6312	1524	1748	1806	2031	1991	18516	19115	18348
1710	1073	1251	4227	4732	4158	4401	5382	5020	172	218	275	298	294	6544	6433	6320	1529	1743	1816	2032	2006	18581	19101	18434
1725	1082	1259	4246	4755	4185	4384	5367	5034	173	220	277	301	294	6576	6420	6317	1535	1753	1820	2039	1758	18714	19165	18408
1740.1	1081	1250	4269	4800	4194	4412	5398	5039	175	220	279	297	294	6548	6425	6313	1536	1738	1824	2041	1749	18631	19198	18437
1755	1078	1251	4277	4788	4213	4402	5392	5056	176	222	276	298	291	6543	6438	6345	1537	1735	1825	2042	1758	18552	19167	18523
1770.1	1075	1256	4264	4823	4244	4424	5462	5075	174	222	274	304	292	6551	6460	6318	1524	1731	1809	2037	1762	18683	19282	18567
1785.1	1078	1253	4318	4844	4230	4437	5460	5105	172	224	277	301	294	6536	6460	6365	1533	1736	1816	2031	1762	18760	19350	18635
1800	1073	1260	4344	4869	4256	4479	5481	5159	174	219	269	299	297	6578	6465	6381	1547	1746	1824	2054	1764	18797	19426	18690
1815.1	1085	1260	4328	4895	4291	4466	5475	5148	175	220	277	302	295	6551	6461	6363	1521	1746	1820	2040	1773	18720	19467	18671
1830	1070	1254	4356	4906	4280	4470	5507	5154	170	221	276	302	296	6571	6444	6344	1523	1741	1820	2043	1761	18755	19447	18643
1845.1	1075	1263	4360	4933	4319	4461	5520	5188	175	220	280	301	294	6554	6452	6362	1524	1737	1818	2053	1770	18814	19433	18744
1860	1075	1268	4386	4957	4321	4496	5550	5212	175	223	280	306	294	6550	6458	6352	1523	1746	1820	2052	1765	18774	19514	18762
1875	1078	1261	4377	4940	4328	4490	5544	5228	176	218	278	301	292	6533	6475	6370	1527	1750	1810	2045	1762	18888	19623	18772
1890	1079	1262	4397	4977	4349	4538	5560	5246	179	222	280	302	295	6570	6437	6339	1533	1743	1813	2041	1759	18960	19563	18816
1905	1072	1254	4423	4962	4355	4530	5577	5246	174	221	275	304	298	6570	6486	6368	1538	1735	1833	2037	1756	18945	19574	18854
1920	1073	1265	4455	4972	4356	4553	5582	5258	177	224	279	299	296	6569	6479	6360	1532	1740	1821	2043	1753	18965	19657	18837
1935	1078	1269	4435	5017	4381	4586	5617	5287	173	219	275	303	294	6575	6452	6343	1542	1750	1818	2040	1765	19037	19588	18904
1950.1	1087	1263	4481	5023	4395	4574	5624	5304	177	220	277	301	297	6547	6481	6373	1531	1745	1820	2033	1762	19048	19652	18967
1965.1	1078	1262	4480	5037	4451	4580	5656	5326	176	219	274	101	293	6577	6467	6372	1532	1744	1825	2044	1756	19062	19657	18951
1980	1082	1264	4511	5062	4443	4595	5652	5330	174	220	273	102	295	6547	6459	6362	1535	1745	1816	2042	1772	19071	19724	18910
1995.1	1078	1260	4499	5104	4457	4611	5674	5324	175	221	280	103	301	6589	6473	6343	1537	1745	1811	2052	1759	19115	19731	18950
2010.1	1082	1258	4546	5089	4454	4598	5696	5340	176	223	280	103	299	6575	6484	6364	1529	1731	1821	2047	1761	19214	19766	18952
2025.1	1082	1258	4549	5122	4474	4619	5705	5381	175	221	278	101	293	6559	6491	6351	1532	1744	1826	2036	1767	19167	19804	19000
2040	1075	1253	4546	5124	4492	4649	5734	5394	175	222	277	104	296	6588	6495	6362	1535	1736	1816	2045	1753	19252	19861	19072
2055.1	1090	1256	4573	5162	4510	4651	5735	5378	174	221	279	101	295	6590	6473	6352	1529	1739	1829	2046	1756	19248	19899	18989
2070.1	1080	1258	4596	5155	4509	4661	5763	5427	174	222	278	104	298	6601	6492	6366	1529	1735	1823	2052	1745	19295	19930	19042
2085.1	1081	1261	4589	5202	4535	4676	5788	5441	177	220	279	100	300	6572	6479	6355	1525	1743	1820	2047	1764	19301	19977	19159
2100	1084	1254	4611	5206	4551	4700	5800	5444	176	220	281	103	302	6600	6499	6361	1528	1736	1825	2049	1756	19337	20002	19205
2115.1	1080	1263	4609	5213	4541	4694	5801	5481	175	219	279	102	297	6580	6480	6374	1536	1729	1817	2039	1758	19311	19950	19187
2130	1084	1260	4650	5227	4569	4706	5819	5474	175	220	278	102	300	6599	6512	6374	1538	1744	1816	2047	1767	19296	20043	19120
2145	1087	1267	4652	5263	4573	4720	5861	5472	178	224	281	103	295	6598	6492	6355	1534	1733	1824	2049	1771	19295	20019	19214
2160	1085	1266	4666	5269	4607	4756	5847	5489	176	220	280	103	292	6609	6504	6396	1537	1730	1823	2071	1762	19433	20047	19235
2175.1	1084	1268	4671	5271	4607	4752	5854	5518	177	221	277	103	302	6626	6501	6379	1533	1738	1829	2036	1768	19442	20101	19243
2190.1	1078	1273	4670	5283	4630	4738	5888	5523	176	223	279	264	295	6575	6473	6353	1533	1740	1815	2044	1767	19494	20039	19250
2205	1080	1267	4702	5316	4654	4767	5900	5574	178	223	277	265	300	6603	6489	6389	1530	1740	1816	2049	1762	19499	20101	19319
2220.1	1084	1277	4728	5341	4643	4779	5905	5551	179	224	279	264	299	6592	6517	6357	1534	1734	1823	2045	1758	19491	20162	19340
2235.1	1081	1264	4720	5326	4651	4787	5905	5592	174	221	279	264	299	6613	6492	6378	1533	1731	1819	2048	1756	19520	20187	19320
2250.1	1096	1275	4722	5363	4690	4799	5921	5629	175	222	278	264	302	6599	6502	6401	1534	1740	1820	2047	1767	19609	20135	19437
2265	1090	1274	4768	5344	4709	4806	5951	5603	174	224	281	265	298	6610	6500	6371	1532	1745	1826	2049	1756	19532	20245	19431
2280.1	1087	1265	4799	5402	4692	4821	5960	5619	180	218	280	263	297	6588	6502	6362	1542	1746	1820	2048	1758	19643	20254	19406
2295.1	1091	1274	4800	5427	4718	4845	6002	5663	179	222	282	268	301	6627	6510	6390	1542	1747	1823	2051	1777	19726	20277	19496
2310.1	1086	1272	4807	5450	4736	4862	6019	5655	177	222	287	266	298	6637	6510	6413	1543	1740	1819	2035	1767	19723	20311	19560
2325.1	1085	1270	4843	5469	4749	4852	6018	5686	178	225	280	267	301	6603	6484	6409	1526	1744	1838	2054	1763	19616	20299	19493
2340.1	1077	1280	4849	5476	4769	4863	6010	5686	179	224	279	266	301	6618	6518	6389	1537	1738	1810	2054	1757	19679	20356	19473
2355.1	1084	1270	4855	5473	4780	4887	6020	5704	177	223	284	268	297	6616	6514	6375	1531	1747	1821	2043	1773	19750	20351	19555
2370.1	1093	1276	4855	5520	4801	4876	6083	5739	180	223	282	268	298	6634	6525	6392	1532	1745	1823	2041	1763	19786	20414	19547
2385.1	1089	1272	4868	5534	4802	4904	6064	5741	178	224	281	272	298	6593	6545	6423	1539	1746	1816	2048	1763	19810	20416	19595
2400.1	1094	1275	4877	5550	4823	4920	6094	5754	179	226	280	267	297	6599	6533	6371	1544	1754	1814	2048	1763	19739	20430	19660
2415.1	1088	1274	4911	5538	4843	4928	6116	5774	180	224	281	273	306	6635	6523	6405	1532	1747	1823	2036	1762	19808	20457	19571
2430.1	1086	1275	4919	5534	4838	4934	6112	5813	179	220	280	268	300	6634	6525	6428	1535	1742	1814	2045	1764	19790	20390	19721
2445.1	1091	1272	4920	5587	4864	4930	6137	5806	179	223	280	267	301	6603	6517	6400	1540	1739	1814	2049	1764	19841	20489	19713
2460.1	1085	1278	4936	5624	4891	4944	6155	5823	179	225	285	266	303	6633	6538	6419	1541	1738	1818	2055	1769	19831	20573	19711
2475.1	1091	1283	4952	5601	4885	4953	6159	5805	179	225	281	273	297	6606	6553	6406	1538	1747	1813	2058	1766	19797	20562	19733
2490.1	1091	1281	4961	5649	4893	4963	6168	5834	180	224	282	272	301	6629	6514	6404	1528	1744	1820	2050	1766	19874	20524	19776
2505.1	1085	1280	4983	5652	4917	4962	6195	5880	178	221	277	272	302	6567	6510	6408	1536	1743	1818	2038	1761	19937	20551	19804
2520.1	1082	1276	4982	5658	4926	4988	6216	5875	179	226	280	269	295	6578	6564	6422	1530	1747	1823	2060	1773	19949	20619	19761
2535.1	1087	1274	5019	5671	4964	4982	6217	5870	180	226	285	269	302	6638	6547	6426	1527	1748	1817	2055	1762	19959	20551	19824
2550.1	1085	1292	5026	5685	4945	5004	6182	5885	179	224	281	268	303	6626	6534	6400	1528	1750	1827	2042	1776	20024	20560	19791
2565.1	1088	1279	5047	5693	4996	5023	6228	5931	178	226	283	269	300	6670	6524	6435	1535	1743	1816	2051	1765	19978	20587	19882
2580.1	1093	1292	5050	5747	4990	5014	6283	5897	179	224	282	268	296	6643	6532	6452	1542	1750	1819	2046	1770	20041	20652	19877
2595.1	1086	1278	5064	5728	4981	5023	6278	5937	178	225	281	271	304	6609	6538	6431	1539	1742	1816	2046	1773	20004	20663	19894
2610.1	1089	1278	5057	5767	5000	5047	6262	5929	180	224	286	272	300	6623	6543	6424	1540	1747	1827	2051	1760	20089	20664	19882
2625.1	1085	1286	5101	5774	5016	5048	6291	5944	178	224	280	265	300	6610	6524	6411	1537	1740	1817	2052	1757	20041	20681	19868
2640.1	1091	1286	5095	5782	5030	5057	6303	5971	175	228	283	269	299	6605	6534	6454	1537	1741	1823	2059	1757	20040	20716	19939
2655.1	1089	1279	5108	5817	5056	5066	6294	5990	178	224	284	273	302	6619	6536	6430	1531	1734	1819	2057	1764	20030	20795	19931
2670.1	1095	1278	5144	5789	5065	5040	6298	6010	180	227	283	265	301	6603	6511	6443	1542	1745	1833	2042	1762	19999	20668	20015
2685.1	1080	1287	5164	5825	5065	5087	6294	6027	183	226	281	271	300	6625	6513	6438	1537	1738	1831	2046	1769	20107	20703	20004
2700.1	1095	1282	5167	5828	5106	5088	6368	6017	180	227	282	271	298	6622	6529	6458	1546	1752	1821	1798	1758	20137	20745	19930
Mittelwert Blank	Abzug Blank
Time [s]	Mittel Blank A1	Mittel Blank A2	Mittel Blank A2*	PlbF A1	PlbF A1	PlbF A1	pos.K. A1	pos.K. A1	pos.K. A1	PlbF A2	PlbF A2	PlbF A2	pos.K. A2	pos.K. A2	pos.K. A2	PlbF A2*	PlbF A2*	PlbF A2*	pos.K. A2*	pos.K. A2*	pos.K. A2*
0	1096.5	185	1710	1380.5	1307.5	1061.5	-237.5	-183.5	-408.5	82	99	104	953	921	869	249	327	263	5601	5355	6035
15	1099	188	1690.5	1419	1324	1106	-135	-34	-304	80	88	101	1257	1270	1207	268.5	346.5	308.5	6152.5	5959.5	6616.5
30	1079	182.5	1655.5	1491	1395	1168	-3	142	-172	86.5	90.5	105.5	1531.5	1614.5	1558.5	292.5	400.5	342.5	6548.5	6520.5	6963.5
45	1080	185	1651	1520	1441	1183	123	262	-73	84	91	109	1792	1857	1848	302	397	359	6931	6914	7505
60	1086	187	1645	1549	1463	1208	245	359	3	78	87	102	2006	2038	2079	295	406	353	7286	7272	7866
75	1088.5	187	1638	1598.5	1479.5	1239.5	325.5	478.5	80.5	83	88	105	2238	2262	2227	289	397	372	7540	7621	8163
90	1087.5	189	1640	1637.5	1510.5	1274.5	408.5	615.5	148.5	83	86	106	2501	2511	2366	291	393	370	7806	7872	8429
105	1090.5	187	1636	1654.5	1549.5	1295.5	464.5	722.5	219.5	77	88	104	2736	2770	2549	292	417	370	7995	8169	8651
120	1091	188.5	1636	1675	1582	1320	537	854	299	80.5	82.5	105.5	2966.5	2987.5	2756.5	297	402	379	8138	8292	8809
135	1094.5	188.5	1646	1722.5	1599.5	1354.5	621.5	972.5	369.5	78.5	87.5	103.5	3189.5	3212.5	3024.5	298	390	363	8358	8473	9031
150	1104	192.5	1652.5	1720	1642	1368	677	1077	424	74.5	87.5	93.5	3366.5	3407.5	3226.5	290.5	406.5	363.5	8544.5	8678.5	9127.5
165	1101	190	1644.5	1745	1653	1390	763	1156	496	79	84	98	3540	3581	3411	298.5	394.5	374.5	8792.5	8894.5	9310.5
180	1099.5	191.5	1639.5	1791.5	1681.5	1417.5	847.5	1241.5	569.5	76.5	81.5	97.5	3716.5	3726.5	3561.5	296.5	394.5	372.5	9078.5	9123.5	9523.5
195	1103	193	1641.5	1817	1715	1430	927	1290	642	78	84	97	3881	3843	3708	300.5	397.5	374.5	9270.5	9359.5	9728.5
210	1101.5	193.5	1634.5	1841.5	1727.5	1464.5	999.5	1341.5	723.5	76.5	81.5	92.5	4011.5	3962.5	3834.5	300.5	406.5	384.5	9495.5	9546.5	9913.5
225	1104	190	1641	1855	1759	1462	1086	1409	789	79	83	100	4145	4108	3960	294	409	365	9692	9819	10095
240	1102	195.5	1636	1888	1778	1502	1136	1451	865	72.5	83.5	90.5	4259.5	4200.5	4089.5	301	404	373	9833	10025	10305
255	1103.5	197.5	1636	1899.5	1810.5	1517.5	1202.5	1505.5	946.5	71.5	79.5	93.5	4390.5	4297.5	4199.5	297	399	367	9966	10162	10414
270	1098	192	1625	1931	1830	1538	1271	1581	1005	77	83	93	4510	4436	4286	300	409	381	10104	10337	10529
285	1106	195	1631	1952	1847	1553	1328	1650	1070	70	81	90	4643	4514	4395	305	391	372	10320	10493	10677
300	1101.5	197.5	1631.5	1969.5	1881.5	1563.5	1378.5	1737.5	1137.5	71.5	79.5	92.5	4694.5	4631.5	4475.5	294.5	406.5	367.5	10429.5	10641.5	10815.5
315	1099	193	1631	1984	1895	1602	1427	1777	1205	75	84	90	4801	4688	4569	301	413	379	10551	10715	10929
330	1093.5	197	1624.5	2024.5	1927.5	1618.5	1464.5	1857.5	1286.5	72	76	89	4893	4782	4644	305.5	405.5	378.5	10668.5	10836.5	10994.5
345	1102	194.5	1633.5	2046	1942	1640	1519	1902	1332	71.5	79.5	95.5	4980.5	4868.5	4734.5	302.5	391.5	367.5	10810.5	10977.5	11090.5
360	1098	198	1631	2063	1954	1656	1561	1975	1398	72	75	90	5079	4953	4836	293	403	388	10915	11140	11253
375	1102.5	195.5	1622	2083.5	1993.5	1671.5	1607.5	2014.5	1455.5	71.5	79.5	91.5	5152.5	4982.5	4895.5	312	408	392	11071	11287	11390
390	1099.5	195.5	1632.5	2095.5	2027.5	1678.5	1643.5	2080.5	1502.5	74.5	83.5	93.5	5225.5	5079.5	4957.5	287.5	397.5	370.5	11150.5	11419.5	11401.5
405	1097	198	1626.5	2135	2031	1712	1693	2116	1553	72	76	86	5292	5147	5018	301.5	399.5	376.5	11321.5	11508.5	11530.5
420	1104	195.5	1636.5	2149	2057	1729	1719	2154	1613	71.5	78.5	91.5	5356.5	5209.5	5090.5	292.5	399.5	357.5	11469.5	11677.5	11626.5
435	1102	195.5	1629.5	2159	2081	1740	1756	2204	1646	71.5	82.5	92.5	5418.5	5272.5	5117.5	296.5	390.5	383.5	11562.5	11815.5	11723.5
450	1108	197.5	1629.5	2181	2086	1745	1799	2231	1688	73.5	77.5	92.5	5463.5	5285.5	5197.5	294.5	403.5	372.5	11672.5	11935.5	11874.5
465	1105	197	1632.5	2222	2122	1780	1840	2267	1730	72	77	94	5517	5363	5215	290.5	390.5	366.5	11841.5	12038.5	11903.5
480	1104.5	197.5	1629	2238.5	2134.5	1805.5	1851.5	2318.5	1782.5	67.5	76.5	86.5	5575.5	5425.5	5287.5	288	398	380	11918	12171	12038
495	1104.5	197	1626	2234.5	2163.5	1811.5	1887.5	2351.5	1823.5	69	78	93	5639	5476	5307	301	400	375	12046	12308	12112
510	1102	199.5	1628.5	2276	2169	1841	1922	2376	1878	66.5	76.5	86.5	5690.5	5483.5	5345.5	298.5	396.5	375.5	12202.5	12391.5	12236.5
525	1106.5	195	1634	2274.5	2201.5	1837.5	1957.5	2424.5	1917.5	74	85	90	5709	5552	5432	298	389	366	12254	12503	12280
540	1105.5	197.5	1619.5	2297.5	2199.5	1868.5	1959.5	2459.5	1965.5	69.5	81.5	93.5	5730.5	5586.5	5450.5	302.5	407.5	392.5	12354.5	12649.5	12416.5
555	1109	199.5	1630	2322	2227	1878	1994	2499	2003	69.5	77.5	85.5	5798.5	5608.5	5502.5	303	391	384	12466	12777	12521
570	1107	196	1637.5	2341	2258	1891	2033	2517	2023	73	77	92	5815	5639	5503	281.5	389.5	365.5	12535.5	12827.5	12609.5
585	1105.5	199.5	1626	2383.5	2262.5	1915.5	2050.5	2557.5	2071.5	66.5	80.5	90.5	5841.5	5644.5	5549.5	303	404	396	12631	12976	12628
600	1113.5	198	1626.5	2381.5	2299.5	1907.5	2061.5	2594.5	2106.5	68	76	89	5859	5713	5585	300.5	407.5	367.5	12819.5	13063.5	12787.5
615	1116	198	1621	2390	2315	1938	2097	2617	2146	67	79	88	5883	5732	5642	309	421	385	12821	13180	12917
630	1111	198.5	1634	2415	2332	1977	2120	2654	2177	70.5	77.5	85.5	5930.5	5735.5	5636.5	295	396	369	12953	13272	12968
645	1110.5	200.5	1622	2423.5	2355.5	1978.5	2117.5	2678.5	2201.5	65.5	74.5	83.5	5927.5	5772.5	5660.5	303	410	366	12984	13387	13023
660	1118	198	1622	2450	2371	1974	2161	2698	2236	72	82	90	5975	5786	5667	302	407	378	13257	13425	13140
675	1115	198.5	1615.5	2493	2385	2001	2163	2741	2305	66.5	77.5	92.5	5976.5	5828.5	5748.5	312.5	414.5	395.5	13225.5	13595.5	13296.5
690	1113.5	198.5	1619.5	2508.5	2408.5	2011.5	2204.5	2768.5	2333.5	66.5	85.5	89.5	6010.5	5841.5	5742.5	303.5	408.5	375.5	13291.5	13689.5	13399.5
705	1109.5	200.5	1632.5	2520.5	2435.5	2034.5	2212.5	2826.5	2333.5	68.5	76.5	87.5	6037.5	5880.5	5722.5	291.5	407.5	371.5	13429.5	13752.5	13294.5
720	1112.5	200.5	1619	2531.5	2460.5	2058.5	2234.5	2831.5	2372.5	68.5	76.5	88.5	6039.5	5854.5	5758.5	317	420	373	13453	13833	13468
735	1116.5	201.5	1629.5	2552.5	2464.5	2086.5	2254.5	2852.5	2398.5	64.5	77.5	83.5	6084.5	5903.5	5763.5	293.5	408.5	376.5	13547.5	13921.5	13532.5
750	1119.5	198.5	1627.5	2573.5	2458.5	2075.5	2275.5	2899.5	2414.5	70.5	76.5	91.5	6083.5	5950.5	5775.5	301.5	388.5	378.5	13609.5	14069.5	13546.5
765	1115.5	200.5	1628.5	2582.5	2505.5	2112.5	2297.5	2921.5	2475.5	70.5	79.5	88.5	6120.5	5943.5	5814.5	306.5	413.5	377.5	13734.5	14118.5	13675.5
780	1121	200.5	1622.5	2616	2509	2109	2314	2919	2493	70.5	79.5	87.5	6092.5	5945.5	5836.5	299.5	402.5	373.5	13806.5	14119.5	13774.5
795	1123.5	203	1616	2619.5	2529.5	2140.5	2339.5	2966.5	2510.5	67	75	88	6110	5962	5823	312	414	386	13915	14300	13822
810	1123.5	200.5	1635	2644.5	2552.5	2142.5	2328.5	2992.5	2528.5	67.5	78.5	91.5	6131.5	5984.5	5838.5	297	396	376	14012	14295	13883
825	1124.5	196	1630	2670.5	2570.5	2153.5	2378.5	3014.5	2567.5	74	81	91	6155	5995	5842	295	400	359	14080	14468	13903
840	1118.5	198	1632.5	2690.5	2594.5	2174.5	2406.5	3052.5	2599.5	70	80	91	6163	6007	5877	299.5	415.5	372.5	14141.5	14490.5	13992.5
855	1120	200	1628.5	2690	2605	2204	2404	3070	2644	67	83	87	6167	5996	5921	289.5	390.5	380.5	14212.5	14577.5	14184.5
870	1125	200	1622	2718	2633	2199	2436	3089	2676	68	79	91	6194	6010	5929	302	407	385	14325	14606	14196
885	1121.5	200.5	1623.5	2751.5	2637.5	2229.5	2451.5	3121.5	2694.5	69.5	78.5	88.5	6174.5	6024.5	5944.5	299.5	412.5	371.5	14379.5	14732.5	14251.5
900	1124	199	1634.5	2774	2662	2208	2479	3135	2711	70	78	88	6219	6018	5902	285.5	400.5	364.5	14444.5	14783.5	14247.5
915	1120.5	200.5	1627.5	2789.5	2700.5	2277.5	2483.5	3199.5	2731.5	71.5	79.5	88.5	6207.5	6060.5	5937.5	295.5	405.5	379.5	14462.5	14863.5	14322.5
930	1123.5	199	1632.5	2808.5	2701.5	2286.5	2484.5	3195.5	2760.5	67	85	91	6166	6037	5949	285.5	403.5	368.5	14460.5	14899.5	14491.5
945	1128.5	201.5	1632	2816.5	2737.5	2302.5	2493.5	3236.5	2791.5	68.5	79.5	86.5	6212.5	6068.5	5952.5	297	407	367	14531	15063	14495
960	1124.5	203.5	1635	2838.5	2739.5	2295.5	2531.5	3254.5	2814.5	69.5	76.5	85.5	6180.5	6078.5	5944.5	288	387	381	14563	15085	14523
975	1130.5	202.5	1626	2828.5	2756.5	2335.5	2537.5	3286.5	2815.5	67.5	82.5	86.5	6195.5	6076.5	5961.5	298	405	375	14655	15176	14582
990	1134.5	201	1627	2872.5	2756.5	2332.5	2532.5	3295.5	2854.5	65	81	91	6215	6058	5972	296	403	377	14762	15162	14720
1005	1126.5	202	1627	2884.5	2802.5	2339.5	2585.5	3304.5	2886.5	71	81	91	6224	6074	5990	292	404	380	14829	15235	14757
1020	1127	202.5	1629	2915	2808	2370	2596	3342	2919	71.5	78.5	86.5	6213.5	6105.5	5978.5	283	402	383	14832	15322	14824
1035	1133.5	203.5	1627.5	2431.5	2832.5	2372.5	2604.5	3359.5	2930.5	67.5	77.5	87.5	6206.5	6081.5	5946.5	302.5	417.5	372.5	14854.5	15452.5	14770.5
1050	1140.5	201	1634	2416.5	2847.5	2389.5	2614.5	3375.5	2938.5	70	80	90	6235	6092	6004	295	415	374	14965	15413	14912
1065	1130.5	203	1626.5	2443.5	2846.5	2425.5	2638.5	3406.5	2971.5	69	80	86	6246	6115	5982	295.5	401.5	377.5	15030.5	15523.5	14949.5
1080	1134	200	1628	2470	2876	2413	2654	3428	3007	70	82	92	6252	6116	6003	299	402	367	15057	15603	14981
1095	1139	202.5	1626	2458	2897	2429	2663	3447	3010	68.5	82.5	84.5	6235.5	6133.5	6005.5	295	405	378	15149	15681	15041
1110	1140	201.5	1630.5	2475	2893	2426	2681	3451	3043	70.5	81.5	84.5	6280.5	6086.5	6029.5	288.5	399.5	378.5	15221.5	15647.5	15116.5
1125	1131	203	1624	2512	2954	2447	2692	3500	3094	66	83	88	6256	6119	6048	294	418	365	15247	15778	15150
1140	1144	202	1634	2528	2957	2450	2700	3525	3074	69	91	90	6235	6148	6018	280	417	361	15289	15829	15167
1155	1139.5	203.5	1634.5	2553.5	2970.5	2495.5	2715.5	3540.5	3118.5	67.5	86.5	87.5	6212.5	6145.5	6035.5	288.5	419.5	362.5	15227.5	15841.5	15246.5
1170	1138	202	1632	2539	3011	2503	2748	3559	3155	71	90	94	6274	6138	6060	301	406	382	15422	15914	15302
1185	1138	202	1624.5	2570	2997	2534	2746	3565	3153	69	88	90	6272	6130	6050	306.5	403.5	379.5	15484.5	15950.5	15404.5
1200	1144.5	201.5	1640.5	2576.5	2998.5	2523.5	2750.5	3586.5	3162.5	68.5	85.5	90.5	6276.5	6129.5	6022.5	274.5	392.5	360.5	15532.5	15905.5	15352.5
1215	1144.5	202.5	1630.5	2596.5	3033.5	2525.5	2804.5	3597.5	3206.5	73.5	92.5	89.5	6279.5	6128.5	6030.5	301.5	409.5	368.5	15589.5	16042.5	15494.5
1230	1143	204.5	1632	2633	3044	2575	2802	3671	3191	66.5	85.5	86.5	6280.5	6154.5	6035.5	289	400	383	15608	16175	15491
1245	1143.5	204.5	1625	2640.5	3063.5	2568.5	2811.5	3656.5	3231.5	70.5	88.5	87.5	6273.5	6147.5	6026.5	297	414	380	15780	16188	15558
1260	1150	199	1628.5	2643	3074	2599	2796	3676	3265	78	95	92	6293	6171	6071	305.5	405.5	386.5	15713.5	16271.5	15666.5
1275	1143	203.5	1632	2659	3079	2608	2850	3693	3309	73.5	91.5	89.5	6288.5	6167.5	6065.5	295	396	383	15808	16270	15635
1290	1148.5	202.5	1635	2675.5	3095.5	2625.5	2839.5	3737.5	3318.5	69.5	88.5	88.5	6292.5	6155.5	6082.5	293	403	371	15833	16298	15749
1305	1145	205	1637	2695	3138	2640	2865	3752	3326	70	90	87	6306	6174	6068	273	393	367	15943	16386	15791
1320	1150.5	202	1633	2687.5	3142.5	2664.5	2884.5	3736.5	3355.5	74	86	93	6292	6179	6065	289	397	375	15910	16399	15735
1335	1150.5	205	1634	2709.5	3177.5	2641.5	2905.5	3774.5	3358.5	67	89	87	6298	6169	6047	295	409	374	16002	16447	15777
1350	1150	194	1634.5	2743	3191	2665	2900	3769	3376	83	100	93	6328	6184	6074	295.5	407.5	370.5	15998.5	16490.5	15823.5
1365	1150	193.5	1629.5	2747	3209	2694	2917	3803	3416	84.5	102.5	96.5	6320.5	6207.5	6100.5	294.5	412.5	377.5	16059.5	16528.5	15947.5
1380	1153.5	195	1632.5	2746.5	3229.5	2700.5	2924.5	3850.5	3427.5	80	98	97	6336	6235	6082	302.5	413.5	379.5	16068.5	16669.5	15914.5
1395	1154.5	194	1626	2777.5	3229.5	2715.5	2943.5	3840.5	3458.5	80	99	96	6315	6179	6084	305	403	373	16181	16733	16018
1410	1148	195	1634.5	2803	3249	2745	2983	3837	3466	79	98	98	6315	6208	6060	288.5	397.5	367.5	16194.5	16638.5	16037.5
1425	1153	194.5	1640.5	2804	3270	2713	2969	3854	3472	78.5	98.5	103.5	6335.5	6197.5	6078.5	287.5	401.5	365.5	16218.5	16710.5	15983.5
1440	1153.5	194.5	1629.5	2830.5	3283.5	2740.5	2988.5	3885.5	3491.5	79.5	94.5	96.5	6303.5	6216.5	6048.5	302.5	416.5	375.5	16311.5	16781.5	16088.5
1455	1155	196.5	1628.5	2851	3315	2777	2999	3906	3530	77.5	96.5	92.5	6318.5	6206.5	6094.5	289.5	400.5	385.5	16299.5	16805.5	16139.5
1470	1154	194	1631.5	2849	3314	2800	3010	3908	3571	78	101	102	6290	6208	6103	287.5	407.5	376.5	16311.5	16892.5	16224.5
1485	1156	195.5	1627.5	2865	3321	2786	3032	3954	3562	76.5	95.5	92.5	6294.5	6176.5	6056.5	302.5	416.5	375.5	16381.5	16890.5	16175.5
1500	1159.5	196	1634.5	2884.5	3360.5	2826.5	3076.5	3962.5	3580.5	77	97	99	6353	6194	6094	299.5	412.5	367.5	16542.5	16900.5	16264.5
1515	1160	192.5	1632	2910	3366	2831	3083	3985	3641	84.5	99.5	97.5	6358.5	6218.5	6102.5	195	404	371	16529	17019	16313
1530.1	1162.5	193.5	1637.5	2913.5	3392.5	2842.5	3062.5	4030.5	3638.5	81.5	98.5	103.5	6339.5	6248.5	6109.5	186.5	388.5	382.5	16563.5	17094.5	16357.5
1545	1148.5	194.5	1625.5	2931.5	3432.5	2873.5	3088.5	4056.5	3641.5	80.5	100.5	95.5	6335.5	6220.5	6104.5	194.5	417.5	372.5	16517.5	17109.5	16348.5
1560.1	1155.5	193.5	1638	2955.5	3424.5	2869.5	3108.5	4028.5	3668.5	84.5	105.5	97.5	6334.5	6234.5	6105.5	186	398	372	16596	17151	16394
1575	1153.5	195	1642.5	2960.5	3470.5	2899.5	3103.5	4081.5	3703.5	78	106	97	6343	6229	6118	170.5	383.5	368.5	16558.5	17170.5	16402.5
1590	1165.5	196	1636.5	2938.5	3443.5	2900.5	3121.5	4066.5	3705.5	80	101	100	6321	6245	6123	180.5	409.5	370.5	16611.5	17297.5	16548.5
1605.1	1162	196	1631	2976	3484	2916	3132	4098	3720	77	100	102	6367	6220	6127	181	411	376	16680	17302	16510
1620.1	1161	196	1639	2979	3501	2915	3158	4098	3742	77	105	99	6334	6234	6147	173	403	366	16694	17256	16575
1635	1159.5	197.5	1635	2996.5	3519.5	2938.5	3170.5	4141.5	3749.5	78.5	102.5	95.5	6326.5	6246.5	6102.5	184	407	370	16699	17480	16641
1650	1163	197.5	1643.5	2997	3516	2948	3171	4129	3787	76.5	99.5	97.5	6340.5	6243.5	6116.5	166.5	389.5	360.5	16833.5	17423.5	16683.5
1665	1160	197.5	1629.5	3010	3533	2981	3171	4187	3806	84.5	99.5	94.5	6342.5	6234.5	6139.5	184.5	406.5	372.5	16866.5	17419.5	16745.5
1680.1	1166.5	197.5	1637	3046.5	3580.5	2945.5	3173.5	4168.5	3810.5	78.5	101.5	95.5	6354.5	6236.5	6128.5	181	397	368	16851	17412	16720
1695	1163.5	194.5	1636	3061.5	3576.5	2980.5	3203.5	4203.5	3834.5	79.5	109.5	97.5	6357.5	6252.5	6117.5	170	395	355	16880	17479	16712
1710	1162	195	1636	3065	3570	2996	3239	4220	3858	80	103	99	6349	6238	6125	180	396	370	16945	17465	16798
1725	1170.5	196.5	1644	3075.5	3584.5	3014.5	3213.5	4196.5	3863.5	80.5	104.5	97.5	6379.5	6223.5	6120.5	176	395	114	17070	17521	16764
1740.1	1165.5	197.5	1637	3103.5	3634.5	3028.5	3246.5	4232.5	3873.5	81.5	99.5	96.5	6350.5	6227.5	6115.5	187	404	112	16994	17561	16800
1755	1164.5	199	1636	3112.5	3623.5	3048.5	3237.5	4227.5	3891.5	77	99	92	6344	6239	6146	189	406	122	16916	17531	16887
1770.1	1165.5	198	1627.5	3098.5	3657.5	3078.5	3258.5	4296.5	3909.5	76	106	94	6353	6262	6120	181.5	409.5	134.5	17055.5	17654.5	16939.5
1785.1	1165.5	198	1634.5	3152.5	3678.5	3064.5	3271.5	4294.5	3939.5	79	103	96	6338	6262	6167	181.5	396.5	127.5	17125.5	17715.5	17000.5
1800	1166.5	196.5	1646.5	3177.5	3702.5	3089.5	3312.5	4314.5	3992.5	72.5	102.5	100.5	6381.5	6268.5	6184.5	177.5	407.5	117.5	17150.5	17779.5	17043.5
1815.1	1172.5	197.5	1633.5	3155.5	3722.5	3118.5	3293.5	4302.5	3975.5	79.5	104.5	97.5	6353.5	6263.5	6165.5	186.5	406.5	139.5	17086.5	17833.5	17037.5
1830	1162	195.5	1632	3194	3744	3118	3308	4345	3992	80.5	106.5	100.5	6375.5	6248.5	6148.5	188	411	129	17123	17815	17011
1845.1	1169	197.5	1630.5	3191	3764	3150	3292	4351	4019	82.5	103.5	96.5	6356.5	6254.5	6164.5	187.5	422.5	139.5	17183.5	17802.5	17113.5
1860	1171.5	199	1634.5	3214.5	3785.5	3149.5	3324.5	4378.5	4040.5	81	107	95	6351	6259	6153	185.5	417.5	130.5	17139.5	17879.5	17127.5
1875	1169.5	197	1638.5	3207.5	3770.5	3158.5	3320.5	4374.5	4058.5	81	104	95	6336	6278	6173	171.5	406.5	123.5	17249.5	17984.5	17133.5
1890	1170.5	200.5	1638	3226.5	3806.5	3178.5	3367.5	4389.5	4075.5	79.5	101.5	94.5	6369.5	6236.5	6138.5	175	403	121	17322	17925	17178
1905	1163	197.5	1636.5	3260	3799	3192	3367	4414	4083	77.5	106.5	100.5	6372.5	6288.5	6170.5	196.5	400.5	119.5	17308.5	17937.5	17217.5
1920	1169	200.5	1636	3286	3803	3187	3384	4413	4089	78.5	98.5	95.5	6368.5	6278.5	6159.5	185	407	117	17329	18021	17201
1935	1173.5	196	1646	3261.5	3843.5	3207.5	3412.5	4443.5	4113.5	79	107	98	6379	6256	6147	172	394	119	17391	17942	17258
1950.1	1175	198.5	1638	3306	3848	3220	3399	4449	4129	78.5	102.5	98.5	6348.5	6282.5	6174.5	182	395	124	17410	18014	17329
1965.1	1170	197.5	1638	3310	3867	3281	3410	4486	4156	76.5	-96.5	95.5	6379.5	6269.5	6174.5	187	406	118	17424	18019	17313
1980	1173	197	1640	3338	3889	3270	3422	4479	4157	76	-95	98	6350	6262	6165	176	402	132	17431	18084	17270
1995.1	1169	198	1641	3330	3935	3288	3442	4505	4155	82	-95	103	6391	6275	6145	170	411	118	17474	18090	17309
2010.1	1170	199.5	1630	3376	3919	3284	3428	4526	4170	80.5	-96.5	99.5	6375.5	6284.5	6164.5	191	417	131	17584	18136	17322
2025.1	1170	198	1638	3379	3952	3304	3449	4535	4211	80	-97	95	6361	6293	6153	188	398	129	17529	18166	17362
2040	1164	198.5	1635.5	3382	3960	3328	3485	4570	4230	78.5	-94.5	97.5	6389.5	6296.5	6163.5	180.5	409.5	117.5	17616.5	18225.5	17436.5
2055.1	1173	197.5	1634	3400	3989	3337	3478	4562	4205	81.5	-96.5	97.5	6392.5	6275.5	6154.5	195	412	122	17614	18265	17355
2070.1	1169	198	1632	3427	3986	3340	3492	4594	4258	80	-94	100	6403	6294	6168	191	420	113	17663	18298	17410
2085.1	1171	198.5	1634	3418	4031	3364	3505	4617	4270	80.5	-98.5	101.5	6373.5	6280.5	6156.5	186	413	130	17667	18343	17525
2100	1169	198	1632	3442	4037	3382	3531	4631	4275	83	-95	104	6402	6301	6163	193	417	124	17705	18370	17573
2115.1	1171.5	197	1632.5	3437.5	4041.5	3369.5	3522.5	4629.5	4309.5	82	-95	100	6383	6283	6177	184.5	406.5	125.5	17678.5	18317.5	17554.5
2130	1172	197.5	1641	3478	4055	3397	3534	4647	4302	80.5	-95.5	102.5	6401.5	6314.5	6176.5	175	406	126	17655	18402	17479
2145	1177	201	1633.5	3475	4086	3396	3543	4684	4295	80	-98	94	6397	6291	6154	190.5	415.5	137.5	17661.5	18385.5	17580.5
2160	1175.5	198	1633.5	3490.5	4093.5	3431.5	3580.5	4671.5	4313.5	82	-95	94	6411	6306	6198	189.5	437.5	128.5	17799.5	18413.5	17601.5
2175.1	1176	199	1635.5	3495	4095	3431	3576	4678	4342	78	-96	103	6427	6302	6180	193.5	400.5	132.5	17806.5	18465.5	17607.5
2190.1	1175.5	199.5	1636.5	3494.5	4107.5	3454.5	3562.5	4712.5	4347.5	79.5	64.5	95.5	6375.5	6273.5	6153.5	178.5	407.5	130.5	17857.5	18402.5	17613.5
2205	1173.5	200.5	1635	3528.5	4142.5	3480.5	3593.5	4726.5	4400.5	76.5	64.5	99.5	6402.5	6288.5	6188.5	181	414	127	17864	18466	17684
2220.1	1180.5	201.5	1634	3547.5	4160.5	3462.5	3598.5	4724.5	4370.5	77.5	62.5	97.5	6390.5	6315.5	6155.5	189	411	124	17857	18528	17706
2235.1	1172.5	197.5	1632	3547.5	4153.5	3478.5	3614.5	4732.5	4419.5	81.5	66.5	101.5	6415.5	6294.5	6180.5	187	416	124	17888	18555	17688
2250.1	1185.5	198.5	1637	3536.5	4177.5	3504.5	3613.5	4735.5	4443.5	79.5	65.5	103.5	6400.5	6303.5	6202.5	183	410	130	17972	18498	17800
2265	1182	199	1638.5	3586	4162	3527	3624	4769	4421	82	66	99	6411	6301	6172	187.5	410.5	117.5	17893.5	18606.5	17792.5
2280.1	1176	199	1644	3623	4226	3516	3645	4784	4443	81	64	98	6389	6303	6163	176	404	114	17999	18610	17762
2295.1	1182.5	200.5	1644.5	3617.5	4244.5	3535.5	3662.5	4819.5	4480.5	81.5	67.5	100.5	6426.5	6309.5	6189.5	178.5	406.5	132.5	18081.5	18632.5	17851.5
2310.1	1179	199.5	1641.5	3628	4271	3557	3683	4840	4476	87.5	66.5	98.5	6437.5	6310.5	6213.5	177.5	393.5	125.5	18081.5	18669.5	17918.5
2325.1	1177.5	201.5	1635	3665.5	4291.5	3571.5	3674.5	4840.5	4508.5	78.5	65.5	99.5	6401.5	6282.5	6207.5	203	419	128	17981	18664	17858
2340.1	1178.5	201.5	1637.5	3670.5	4297.5	3590.5	3684.5	4831.5	4507.5	77.5	64.5	99.5	6416.5	6316.5	6187.5	172.5	416.5	119.5	18041.5	18718.5	17835.5
2355.1	1177	200	1639	3678	4296	3603	3710	4843	4527	84	68	97	6416	6314	6175	182	404	134	18111	18712	17916
2370.1	1184.5	201.5	1638.5	3670.5	4335.5	3616.5	3691.5	4898.5	4554.5	80.5	66.5	96.5	6432.5	6323.5	6190.5	184.5	402.5	124.5	18147.5	18775.5	17908.5
2385.1	1180.5	201	1642.5	3687.5	4353.5	3621.5	3723.5	4883.5	4560.5	80	71	97	6392	6344	6222	173.5	405.5	120.5	18167.5	18773.5	17952.5
2400.1	1184.5	202.5	1649	3692.5	4365.5	3638.5	3735.5	4909.5	4569.5	77.5	64.5	94.5	6396.5	6330.5	6168.5	165	399	114	18090	18781	18011
2415.1	1181	202	1639.5	3730	4357	3662	3747	4935	4593	79	71	104	6433	6321	6203	183.5	396.5	122.5	18168.5	18817.5	17931.5
2430.1	1180.5	199.5	1638.5	3738.5	4353.5	3657.5	3753.5	4931.5	4632.5	80.5	68.5	100.5	6434.5	6325.5	6228.5	175.5	406.5	125.5	18151.5	18751.5	18082.5
2445.1	1181.5	201	1639.5	3738.5	4405.5	3682.5	3748.5	4955.5	4624.5	79	66	100	6402	6316	6199	174.5	409.5	124.5	18201.5	18849.5	18073.5
2460.1	1181.5	202	1639.5	3754.5	4442.5	3709.5	3762.5	4973.5	4641.5	83	64	101	6431	6336	6217	178.5	415.5	129.5	18191.5	18933.5	18071.5
2475.1	1187	202	1642.5	3765	4414	3698	3766	4972	4618	79	71	95	6404	6351	6204	170.5	415.5	123.5	18154.5	18919.5	18090.5
2490.1	1186	202	1636	3775	4463	3707	3777	4982	4648	80	70	99	6427	6312	6202	184	414	130	18238	18888	18140
2505.1	1182.5	199.5	1639.5	3800.5	4469.5	3734.5	3779.5	5012.5	4697.5	77.5	72.5	102.5	6367.5	6310.5	6208.5	178.5	398.5	121.5	18297.5	18911.5	18164.5
2520.1	1179	202.5	1638.5	3803	4479	3747	3809	5037	4696	77.5	66.5	92.5	6375.5	6361.5	6219.5	184.5	421.5	134.5	18310.5	18980.5	18122.5
2535.1	1180.5	203	1637.5	3838.5	4490.5	3783.5	3801.5	5036.5	4689.5	82	66	99	6435	6344	6223	179.5	417.5	124.5	18321.5	18913.5	18186.5
2550.1	1188.5	201.5	1639	3837.5	4496.5	3756.5	3815.5	4993.5	4696.5	79.5	66.5	101.5	6424.5	6332.5	6198.5	188	403	137	18385	18921	18152
2565.1	1183.5	202	1639	3863.5	4509.5	3812.5	3839.5	5044.5	4747.5	81	67	98	6468	6322	6233	177	412	126	18339	18948	18243
2580.1	1192.5	201.5	1646	3857.5	4554.5	3797.5	3821.5	5090.5	4704.5	80.5	66.5	94.5	6441.5	6330.5	6250.5	173	400	124	18395	19006	18231
2595.1	1182	201.5	1640.5	3882	4546	3799	3841	5096	4755	79.5	69.5	102.5	6407.5	6336.5	6229.5	175.5	405.5	132.5	18363.5	19022.5	18253.5
2610.1	1183.5	202	1643.5	3873.5	4583.5	3816.5	3863.5	5078.5	4745.5	84	70	98	6421	6341	6222	183.5	407.5	116.5	18445.5	19020.5	18238.5
2625.1	1185.5	201	1638.5	3915.5	4588.5	3830.5	3862.5	5105.5	4758.5	79	64	99	6409	6323	6210	178.5	413.5	118.5	18402.5	19042.5	18229.5
2640.1	1188.5	201.5	1639	3906.5	4593.5	3841.5	3868.5	5114.5	4782.5	81.5	67.5	97.5	6403.5	6332.5	6252.5	184	420	118	18401	19077	18300
2655.1	1184	201	1632.5	3924	4633	3872	3882	5110	4806	83	72	101	6418	6335	6229	186.5	424.5	131.5	18397.5	19162.5	18298.5
2670.1	1186.5	203.5	1643.5	3957.5	4602.5	3878.5	3853.5	5111.5	4823.5	79.5	61.5	97.5	6399.5	6307.5	6239.5	189.5	398.5	118.5	18355.5	19024.5	18371.5
2685.1	1183.5	204.5	1637.5	3980.5	4641.5	3881.5	3903.5	5110.5	4843.5	76.5	66.5	95.5	6420.5	6308.5	6233.5	193.5	408.5	131.5	18469.5	19065.5	18366.5
2700.1	1188.5	203.5	1649	3978.5	4639.5	3917.5	3899.5	5179.5	4828.5	78.5	67.5	94.5	6418.5	6325.5	6254.5	172	149	109	18488	19096	18281
Mittelwert														delta (T0-tx)
							PLA2		PED6												PLA2		PED6
Time [s]	PlbF A1	Stabw A1	pos.K. A1	Stabw posK	PlbF A2	Stabw A2	pos.K. A2	Stabw posK	PlbF A2*	Stabw A2*	pos.K. A2*	Stabw posK		Time [s]	PlbF A1	Stabw A1	pos.K. A1	Stabw posK	PlbF A2	Stabw A2	pos.K. A2	Stabw posK	PlbF A2*	Stabw A2*	pos.K. A2*	Stabw posK
0	1249.83	167.136	-276.5	117.461	95	11.5326	914.333	42.395	279.667	41.5853	5663.67	344.304		0	0	0	0	0	0	0	0	0	0	0	0	0
15	1283	160.477	-157.667	136.42	89.6667	10.5987	1244.67	33.2616	307.833	39.0043	6242.83	337.687		15	33.1667	4.14848	98.3333	88.3517	0	0	330.333	8.82759	28.1667	3.56888	579.167	31.3282
30	1351.33	165.868	-11	157.153	94.1667	10.0167	1568.17	42.336	345.167	54.0494	6677.5	248.079		30	101.5	12.4585	190.833	129.946	0	0	653.833	17.6516	65.5	10.2566	1013.83	37.6653
45	1381.33	176.245	104	168.306	94.6667	12.897	1832.33	35.2184	352.667	47.8156	7116.67	336.414		45	131.5	16.7782	286.833	171.734	0	0	918	17.6444	73	9.89756	1453	68.6852
60	1406.67	177.342	202.333	181.795	89	12.1244	2041	36.5923	351.333	55.5188	7474.67	338.977		60	156.833	19.7724	364.833	195.732	0	0	1126.67	20.1996	71.6667	11.325	1811	82.129		ΔAFU/min	PLA1-PE	PLA2-PC	PLA2-PE
75	1439.17	182.867	294.833	200.764	92	11.5326	2242.33	17.8979	352.667	56.5361	7774.67	338.736		75	189.333	24.0575	459.333	227.032	0	0	1328	10.5998	73	11.7027	2111	91.9747		PlaF	110.364	0	15.1818
90	1474.17	184.207	390.833	234.001	91.6667	12.5033	2459.33	80.9835	351.333	53.5008	8035.67	342.231		90	224.333	28.032	550.5	254.728	0	0	1545	50.8754	71.6667	10.9133	2372	101.021		Positiv control	288.818	701.576	939.909
105	1499.83	184.582	468.833	251.528	89.6667	13.5769	2685	119	359.667	63.1374	8271.67	339.837		105	250	30.767	622	282.081	0	0	1770.67	78.4765	80	14.0435	2608	107.148
120	1525.67	184.082	563.333	278.436	89.5	13.8924	2903.5	127.738	359.333	55.1936	8413	351.484		120	275.833	33.2812	701	289.107	0	0	1989.17	87.5124	79.6667	12.2368	2749.33	114.864
135	1558.83	187.34	654.5	302.851	89.8333	12.6623	3142.17	102.549	350.333	47.2899	8620.67	359.981		135	309	37.1355	782.167	298.036	0	0	2227.83	72.7086	70.6667	9.53897	2957	123.478		st.dev	PLA1-PE	PLA2-PC	PLA2-PE
150	1576.67	184.871	726	329.246	85.1667	9.71253	3333.5	94.9052	353.5	58.643	8783.5	305.354		150	326.833	38.3227	849	289.338	0	0	2419.17	68.874	73.8333	12.2484	3119.83	108.459		PlaF	12.602	0	2.16266
165	1596	184.236	805	331.998	87	9.84886	3510.67	88.7149	355.833	50.6491	8999.17	274.404		165	346.167	39.9602	917.5	278.067	0	0	2596.33	65.6096	76.1667	10.8415	3335.5	101.706		Positiv control	49.322	18.3359	14.1445
180	1630.17	192.212	886.167	337.665	85.1667	10.9697	3668.17	92.5113	354.5	51.4198	9241.83	244.966		180	380.333	44.8448	990.667	280.63	0	0	2753.83	69.4517	74.8333	10.8545	3578.17	94.8436
195	1654	200.582	953	324.781	86.3333	9.71253	3810.67	90.9194	357.5	50.6853	9452.83	242.846		195	404.167	49.0136	1046.67	266.768	0	0	2896.33	69.1041	77.8333	11.035	3789.17	97.3449
210	1677.83	193.345	1021.5	309.587	83.5	8.18535	3936.17	91.3911	363.833	55.9404	9651.83	228.04		210	428	49.3206	1114.17	255.939	0	0	3021.83	70.1618	84.1667	12.9409	3988.17	94.2269
225	1692	204.888	1094.67	310.091	87.3333	11.1505	4071	97.8928	356	58.0259	9868.67	206.04		225	442.167	53.5429	1181.67	264.96	0	0	3156.67	75.9064	76.3333	12.4419	4205	87.7927
240	1722.67	198.86	1150.67	293.275	82.1667	9.07377	4183.17	86.3153	359.333	52.8425	10054.3	237.363		240	472.833	54.5826	1245.33	268.191	0	0	3268.83	67.449	79.6667	11.7156	4390.67	103.655
255	1742.5	199.872	1218.17	279.829	81.5	11.1355	4295.83	95.5109	354.333	52.1664	10180.7	224.583		255	492.667	56.511	1313.83	279.781	0	0	3381.5	75.1822	74.6667	10.9927	4517	99.6437
270	1766.33	204.089	1285.67	288.28	84.3333	8.0829	4410.67	114.129	363.333	56.6068	10323.3	212.829		270	516.5	59.6784	1365.67	267.97	0	0	3496.33	90.4697	83.6667	13.0352	4659.67	96.0653
285	1784	206.826	1349.33	290.588	80.3333	10.0167	4517.33	124.034	356	45.1774	10496.7	178.528		285	534.167	61.928	1432.17	272.388	0	0	3603	98.9285	76.3333	9.68692	4833	82.2001
300	1804.83	213.582	1417.83	301.928	81.1667	10.5987	4600.5	112.743	356.167	56.8536	10628.8	193.311		300	555	65.6781	1480.33	271.489	0	0	3686.17	90.3358	76.5	12.2114	4965.17	90.3038
315	1827	199.872	1469.67	288.377	83	7.54983	4686	116.013	364.333	57.4224	10731.7	189.55		315	577.167	63.1416	1540.67	278.65	0	0	3771.67	93.3765	84.6667	13.3443	5068	89.5146
330	1856.83	212.024	1536.17	292.168	79	8.88819	4773	124.744	363.167	51.7333	10833.2	163.026		330	607	69.3109	1588.5	271.271	0	0	3858.67	100.847	83.5	11.8946	5169.5	77.7945
345	1876	210.893	1584.33	290.562	82.1667	12.2202	4861.17	123.164	353.833	46.0471	10959.5	140.865
360	1891	210.687	1644.67	297.46	79	9.64365	4956	121.528	361.333	59.6518	11102.7	172.065	delta (330-0s)/min		110.364	12.602	288.818	49.322	0	0	701.576	18.3359	15.1818	2.16266	939.909	14.1445
375	1916.17	216.613	1692.5	289.031	80.8333	10.0664	5010.17	130.715	370.667	51.4328	11249.3	162.802
390	1933.83	223.724	1742.17	301.367	83.8333	9.50438	5087.5	134.179	351.833	57.3265	11323.8	150.381
405	1959.33	220.419	1787.33	293.115	78	7.2111	5152.33	137.078	359.167	51.2478	11453.5	114.843
420	1978.33	220.774	1828.67	286.689	80.5	10.1489	5218.83	133.245	349.833	53.9104	11591.2	108.408
435	1993.33	222.833	1868.67	295.57	82.1667	10.504	5269.5	150.522	356.833	52.3673	11700.5	128.059
450	2004	229.275	1906	286.878	81.1667	10.0167	5315.5	135.514	356.833	56.1635	11827.5	137.655
465	2041.33	231.779	1945.67	283.666	81	11.5326	5365	151.01	349.167	52.2047	11927.8	100.729
480	2059.5	226.033	1984.17	291.589	76.8333	9.50438	5429.5	144.042	355.333	59.0028	12042.3	126.556
495	2069.83	226.522	2020.83	288.148	80	12.1244	5474	166.009	358.667	51.4814	12155.3	136.269
510	2095.33	226.663	2058.67	275.698	76.5	10	5506.5	173.646	356.833	51.5978	12276.8	100.749
525	2104.5	234.092	2099.83	281.88	83	8.18535	5564.33	138.911	351	47.3181	12345.7	136.873
540	2121.83	224.798	2128.17	286.959	81.5	12	5589.17	140.019	367.5	56.7891	12473.5	155.541
555	2142.33	233.795	2165.33	288.999	77.5	8	5636.5	149.973	359.333	48.9115	12588	165.973
570	2163.33	239.471	2191	282.369	80.6667	10.0167	5652.33	156.427	345.5	56.7098	12657.5	151.803
585	2187.17	242.925	2226.5	286.847	79.1667	12.0554	5678.5	148.94	367.667	56.1456	12745	200.057
600	2196.17	253.332	2254.17	295.595	77.6667	10.5987	5719	137.099	358.5	54.0648	12890.2	150.961
615	2214.33	242.232	2286.67	287.124	78	10.5357	5752.33	121.78	371.667	57.1781	12972.7	185.861
630	2241.33	232.651	2317	293.239	77.8333	7.50555	5767.5	149.589	353.333	52.2909	13064.3	180.001
645	2252.5	239.714	2332.5	302.574	74.5	9	5786.83	134.076	359.667	53.7804	13131.3	222.271
660	2265	255.09	2365	290.814	81.3333	9.0185	5809.33	155.32	362.333	54.2248	13274	143.259
675	2293	258.581	2403	301.204	78.8333	13.0512	5851.17	115.678	374.167	54.2433	13372.5	196.359
690	2309.5	262.874	2435.5	295.511	80.5	12.2882	5864.83	135.515	362.5	53.6936	13460.2	205.819
705	2330.17	259.558	2457.5	325.24	77.5	9.53939	5880.17	157.5	356.833	59.3745	13492.2	235.343
720	2350.17	255.073	2479.5	312.552	77.8333	10.0664	5884.17	142.83	370	51.5655	13584.7	215.194
735	2367.83	247.583	2501.83	312.105	75.1667	9.71253	5917.17	160.936	359.5	59.3549	13667.2	220.387
750	2369.17	260.742	2529.83	327.598	79.5	10.8167	5936.5	154.477	356.167	47.606	13741.8	285.511
765	2400.17	252.084	2564.83	321.449	79.5	9	5959.5	153.626	365.833	54.4457	13842.8	240.55
780	2411.33	267.238	2575.33	310.79	79.1667	8.5049	5958.17	128.469	358.5	53.1131	13900.2	190.621
795	2429.83	254.579	2605.5	324.116	76.6667	10.5987	5965	143.524	370.667	52.7004	14012.3	253.429
810	2446.5	267.26	2616.5	340.635	79.1667	12.0139	5984.83	146.5	356.333	52.3482	14063.3	210.742
825	2464.83	274.219	2653.5	326.605	82	8.544	5997.33	156.513	351.333	52.9182	14150.3	288.992
840	2486.5	274.43	2686.17	331.606	80.3333	10.504	6015.67	143.197	362.5	58.643	14208.2	255.606
855	2499.67	259.558	2706	337.301	79	10.583	6028	126.083	353.5	55.6507	14324.8	219.263
870	2516.67	278.371	2733.67	330.297	79.3333	11.5036	6044.33	135.795	364.667	55.3745	14375.7	209.643
885	2539.5	274.452	2755.83	339.185	78.8333	9.50438	6047.83	116.762	361.167	57.2043	14454.5	249.116
900	2548	299.727	2775	332.65	78.6667	9.0185	6046.33	160.388	350.167	58.8246	14491.8	271.117
915	2589.17	273.555	2804.83	363.59	79.8333	8.5049	6068.5	135.178	360.167	57.492	14549.5	280.797
930	2598.83	275.729	2813.5	358.451	81	12.49	6050.67	109.144	352.5	60.6053	14617.2	244.999
945	2618.83	276.786	2840.5	373.916	78.1667	9.07377	6077.83	130.251	357	55.6776	14696.3	318.052
960	2624.5	289.19	2866.83	364.33	77.1667	8.02081	6067.83	118.361	352	55.5068	14723.7	313.562
975	2640.17	266.294	2879.83	378.622	78.8333	10.0167	6077.83	117.006	359.333	55.1936	14804.3	323.936
990	2653.83	284.263	2894.17	383.044	79	13.1149	6081.67	123.217	358.667	55.8062	14881.3	243.97
1005	2675.5	293.859	2925.5	361.083	81	10	6096	118.541	358.667	58.9689	14940.3	257.716
1020	2697.67	288.767	2952.33	374.115	78.8333	7.50555	6099.17	117.628	356	63.9296	14992.7	285.239
1035	2545.5	250.294	2964.83	378.669	77.5	10	6078.17	130.032	364.167	57.9511	15025.8	371.883
1050	2551.17	256.987	2976.17	381.896	80	10	6110.33	116.586	361.333	60.9945	15096.7	275.231
1065	2571.83	238.039	3005.5	385.127	78.3333	8.62168	6114.33	132.001	358.167	55.5818	15167.8	310.668
1080	2586.33	252.472	3029.67	387.498	81.3333	11.0151	6123.67	124.677	356	52.3737	15213.7	339.307
1095	2594.67	262.23	3040	392.86	78.5	8.7178	6124.83	115.245	359.333	57.3265	15290.3	342.61
1110	2598	256.65	3058.33	385.229	78.8333	7.37111	6132.17	131.584	355.5	58.9661	15328.5	281.206
1125	2637.67	275.874	3095.33	404.002	79	11.5326	6141	105.731	359	62.2174	15391.7	338.071
1140	2645	273	3099.67	413.098	83.3333	12.4231	6133.67	109.208	352.667	68.8791	15428.3	352.309
1155	2673.17	259.126	3124.83	412.536	80.5	11.2694	6131.17	89.3663	356.833	65.6836	15438.5	349.138
1170	2684.33	283.474	3154	405.501	85	12.2882	6157.33	108.302	363	55.0182	15546	324.296
1185	2700.33	257.551	3154.67	409.503	82.3333	11.5902	6150.67	112.434	363.167	50.5206	15613.2	294.865
1200	2699.5	260.294	3166.5	418.014	81.5	11.5326	6142.83	127.524	342.5	61.0246	15596.8	282.057
1215	2718.5	275.098	3202.83	396.513	85.1667	10.2144	6146.17	125.437	359.833	54.5191	15708.8	292.842
1230	2750.67	255.684	3221.33	435.293	79.5	11.2694	6156.83	122.517	357.333	59.7857	15758	365.84
1245	2757.5	267.438	3233.17	422.502	82.1667	10.116	6149.17	123.508	363.667	60.1858	15842	319.543
1260	2772	262.463	3245.67	440.318	88.3333	9.07377	6178.33	111.182	365.833	53.1068	15883.8	336.551
1275	2782	258.471	3284	422.056	84.8333	9.86577	6173.83	111.635	358	54.9454	15904.3	328.278
1290	2798.83	258.134	3298.5	449.334	82.1667	10.9697	6176.83	106.613	355.667	56.5803	15960	295.714
1305	2824.33	273.032	3314.33	443.615	82.3333	10.7858	6182.67	119.236	344.333	63.1295	16040	309.133
1320	2831.5	269.579	3325.5	426.792	84.3333	9.60902	6178.67	113.5	353.667	57.0731	16014.7	344.152
1335	2842.83	291.817	3346.17	434.631	81	12.1655	6171.33	125.516	359.333	58.3981	16075.3	340.967
1350	2866.33	283.861	3348.33	435.16	92	8.544	6195.33	127.379	357.833	57.0643	16104.2	345.827
1365	2883.33	283.278	3378.67	444.178	94.5	9.16515	6209.5	110.014	361.5	60.6053	16178.5	308.239
1380	2892.17	293.043	3400.83	463.576	91.6667	10.116	6217.67	127.884	365.167	56.8712	16217.5	398.945
1395	2907.5	280.578	3414.17	450.14	91.6667	10.2144	6192.67	116.105	360.333	50.2129	16310.7	374.722
1410	2932.33	275.77	3428.67	428.222	91.6667	10.9697	6194.33	128.048	351.167	56.3057	16290.2	311.712
1425	2929	298.799	3431.67	443.876	93.5	13.2288	6203.83	128.617	351.5	58.2752	16304.2	370.994
1440	2951.5	291.021	3455.17	449.602	90.1667	9.29157	6189.5	129.626	364.833	57.7437	16393.8	353.76
1455	2981	291.609	3478.33	455.702	88.8333	10.0167	6206.5	112	358.5	60.2246	16414.8	347.657
1470	2987.67	283.673	3496.33	453.632	93.6667	13.5769	6200.33	93.7354	357.167	62.2923	16476.2	363.17
1485	2990.67	288.791	3516	462.718	88.1667	10.2144	6175.83	119.001	364.833	57.7437	16482.5	368.045
1500	3023.83	293.001	3539.83	444.398	91	12.1655	6213.67	130.615	359.833	56.8888	16569.2	318.837
1515	3035.67	288.791	3569.67	455.211	93.8333	8.14453	6226.5	128.187	323.333	112.358	16620.3	361.753
1530.1	3049.5	299.16	3577.17	486.906	94.5	11.5326	6232.5	115.832	319.167	114.932	16671.8	380.256
1545	3079.17	307.367	3595.5	485.637	92.1667	10.4083	6220.17	115.5	328.167	117.925	16658.5	399.614
1560.1	3083.17	298.714	3601.83	463.609	95.8333	10.5987	6224.83	114.806	318.667	115.626	16713.7	391.977
1575	3110.17	313.545	3629.5	493.182	93.6667	14.2945	6230	112.503	307.5	118.882	16710.5	405.936
1590	3094.17	303.128	3631.17	476.865	93.6667	11.8462	6229.67	99.8866	320.167	122.517	16819.2	415.445
1605.1	3125.33	312.06	3650	486.789	93	13.8924	6238	121.008	322.667	123.929	16830.7	416.943
1620.1	3131.67	321.449	3666	474.586	93.6667	14.7422	6238.33	93.5753	314	123.503	16841.7	363.723
1635	3151.5	320.014	3687.17	488.492	92.1667	12.3423	6225.17	113.514	320.333	119.509	16940	468.552
1650	3153.67	314.745	3695.67	485.487	91.1667	12.741	6233.5	112.334	305.5	121.248	16980.2	391.195
1665	3174.67	310.664	3721.33	513.264	92.8333	7.63763	6238.83	101.569	321.167	119.571	17010.5	359.334
1680.1	3190.83	341.219	3717.5	503.977	91.8333	11.9304	6239.83	113.037	315.333	117.236	16994.3	367.593
1695	3206.17	323.265	3747.17	505.688	95.5	15.0997	6242.5	120.312	306.667	120.035	17023.7	403.178
1710	3210.33	313.385	3772.33	496.079	94	12.2882	6237.33	112.001	315.333	117.921	17069.3	350.452
1725	3224.83	312.97	3757.83	499.946	94.1667	12.3423	6241.17	130.401	228.333	147.629	17118.3	380.807
1740.1	3255.5	330.359	3784.17	499.033	92.5	9.64365	6231.17	117.543	234.333	151.645	17118.3	395.442
1755	3261.5	315.13	3785.5	503.44	89.3333	11.2398	6243	99.0606	239	148.455	17111.3	363.731
1770.1	3278.17	328.664	3821.5	524.566	92	15.0997	6245	117.427	241.833	147.093	17216.5	383.728
1785.1	3298.5	332.018	3835.17	519.419	92.6667	12.3423	6255.67	85.6757	235.167	142.304	17280.5	381.87
1800	3323.17	331.446	3873.17	511.548	91.8333	16.773	6278.17	98.8551	234.167	153.08	17324.5	397.657
1815.1	3332.17	338.544	3857.17	514.803	93.8333	12.897	6260.83	94.0284	244.167	142.535	17319.2	446.099
1830	3352	341.602	3881.67	527.231	95.8333	13.6137	6257.5	113.767	242.667	148.736	17316.3	435.474
1845.1	3368.33	343.27	3887.33	541.639	94.1667	10.6927	6258.5	96.0625	249.833	151.447	17366.5	379.206
1860	3383.17	349.943	3914.5	538.178	94.3333	13.0128	6254.33	99.0825	244.5	152.325	17382.2	430.745
1875	3378.83	340.077	3917.83	540.897	93.3333	11.5902	6262.33	82.6216	233.833	151.447	17455.8	461.498
1890	3403.83	349.544	3944.17	523.505	91.8333	11.2398	6248.17	115.941	233	149.68	17475	396.307
1905	3417	332.564	3954.67	535.168	94.8333	15.308	6277.17	101.476	238.833	145.204	17487.8	392.072
1920	3425.33	330.793	3962	526.125	90.8333	10.7858	6268.83	104.835	236.333	151.662	17517	441.144
1935	3437.5	352.641	3989.83	526.508	94.6667	14.2945	6260.67	116.07	228.333	145.898	17530.3	362.663
1950.1	3458	340.476	3992.33	538.176	93.1667	12.8582	6268.5	87.8408	233.667	142.697	17584.3	374.3
1965.1	3486	330.274	4017.33	551.24	25.1667	105.794	6274.5	102.591	237	150.37	17585.3	379.645
1980	3499	339.457	4019.33	541.781	26.3333	105.652	6259	92.5365	236.667	144.863	17595	431.07
1995.1	3517.67	362.031	4034	541.731	30	108.761	6270.33	123.066	233	156.33	17624.3	411.631
2010.1	3526.33	343.156	4041.33	560.194	27.8333	108.094	6274.83	105.832	246.333	150.816	17680.7	415.521
2025.1	3545	354.462	4065	557.527	26	106.785	6269	106.057	238.333	141.387	17685.7	424.279
2040	3556.67	350.339	4095	554.955	27.1667	105.794	6283.17	113.588	235.833	153.663	17759.5	413.482
2055.1	3575.33	359.628	4081.67	552.424	27.5	107.685	6274.17	119.006	243	150.841	17744.7	468.861
2070.1	3584.33	350.563	4114.67	564.809	28.6667	106.702	6288.33	117.602	241.333	159.569	17790.3	457.489
2085.1	3604.33	370.489	4130.67	568.943	27.8333	109.911	6270.17	108.868	243	149.863	17845	437.086
2100	3620.33	362.089	4145.67	561.289	30.6667	109.336	6288.67	119.976	244.667	153.181	17882.7	427.172
2115.1	3616.17	369.915	4153.83	569.681	29	107.764	6281	103.015	238.833	148.17	17850.2	409.444
2130	3643.33	358.807	4161	569.739	29.1667	108.523	6297.5	113.459	235.667	149.534	17845.3	490.053
2145	3652.33	377.638	4174	580.044	25.3333	107.039	6280.67	121.829	247.833	147.602	17875.8	443.238
2160	3671.83	366.364	4188.5	556.138	27	105.825	6305	106.504	251.833	163.659	17938.2	423.388
2175.1	3673.67	366.286	4198.67	564.809	28.3333	108.399	6303	123.503	242.167	140.472	17959.8	449.082
2190.1	3685.5	366.01	4207.5	587.644	79.8333	15.5027	6267.5	111.122	238.833	148.028	17957.8	403.956
2205	3717.17	369.131	4240.17	583.269	80.1667	17.7858	6293.17	107.076	240.667	152.52	18004.7	409.538
2220.1	3723.5	380.832	4231.17	575.786	79.1667	17.5594	6287.17	120.035	241.333	150.487	18030.3	437.555
2235.1	3726.5	371.399	4255.5	576.761	83.1667	17.5594	6296.83	117.517	242.333	153.663	18043.7	453.978
2250.1	3739.5	379.656	4264.17	582.101	82.8333	19.218	6302.17	99.0067	241	148.738	18090	363.654
2265	3758.33	350.828	4271.33	586.989	82.3333	16.5025	6294.67	119.626	238.5	153.013	18097.5	443.69
2280.1	3788.33	382.788	4290.67	584.58	81	17	6285	114.07	231.333	152.713	18123.7	437.53
2295.1	3799.17	387.843	4320.83	594.796	83.1667	16.563	6308.5	118.503	239.167	146.729	18188.5	401.344
2310.1	3818.67	393.337	4333	591.607	84.1667	16.2583	6320.5	112.334	232.167	142.117	18223.2	395.035
2325.1	3842.83	391.389	4341.17	600.741	81.1667	17.1561	6297.17	97.8281	250	151.086	18167.7	434.215
2340.1	3852.83	387.164	4341.17	591.314	80.5	17.6918	6306.83	114.806	236.167	158.406	18198.5	461.962
2355.1	3859	380.306	4360	584.67	83	14.5258	6301.67	120.972	240	144.042	18246.3	414.898
2370.1	3874.17	400.438	4381.5	621.819	81.1667	15.0111	6315.5	121.198	237.167	146.292	18277.2	447.808
2385.1	3887.5	404.915	4389.17	598.679	82.6667	13.2035	6319.33	87.6432	233.167	151.579	18297.8	425.735
2400.1	3898.83	405.046	4404.83	604.074	78.8333	15.0444	6298.5	117.32	226	151.977	18294	423.6
2415.1	3916.33	383.14	4425	611.559	84.6667	17.2143	6319	115.013	234.167	143.855	18305.8	458.688
2430.1	3916.5	380.614	4439.17	612.335	83.1667	16.1658	6329.5	103.058	235.833	149.901	18328.5	367.95
2445.1	3942.17	402.234	4442.83	623.67	81.6667	17.1561	6305.67	101.894	236.167	152.179	18374.8	416.026
2460.1	3968.83	410.824	4459.17	625.751	82.6667	18.5023	6328	107.224	241.167	152.952	18398.8	466.906
2475.1	3959	395.463	4452	619.9	81.6667	12.2202	6319.67	103.616	236.5	156.79	18388.2	461.26
2490.1	3981.67	418.231	4469	622.123	83	14.7309	6313.67	112.509	242.667	150.816	18422	406.532
2505.1	4001.5	406.641	4496.5	640.604	84.1667	16.0728	6295.5	80.5543	232.833	146.275	18457.8	398.475
2520.1	4009.67	407.418	4514	633.908	78.8333	13.0512	6318.83	86.3095	246.833	153.318	18471.2	451
2535.1	4037.5	393.272	4509.17	636.943	82.3333	16.5025	6334	106.353	240.5	155.734	18473.8	386.699
2550.1	4030.17	405.882	4501.83	612.652	82.5	17.6918	6318.5	113.649	242.667	141.175	18486	394.323
2565.1	4061.83	388.528	4543.83	627.787	82	15.5242	6341	118.647	238.333	152.546	18510	382.344
2580.1	4069.83	420.804	4538.83	650.519	80.5	14	6340.83	95.9184	232.333	147.256	18544	408.42
2595.1	4075.67	409.429	4564	648.935	83.8333	16.9214	6324.5	89.6047	237.833	146.787	18546.5	415.881
2610.1	4091.17	427.325	4562.5	627.832	84	14	6328	100.135	235.833	152.395	18568.2	405.174
2625.1	4111.5	415.275	4575.5	641.388	80.6667	17.5594	6314	99.8048	236.833	155.911	18558.2	428.271
2640.1	4113.83	416.673	4588.5	645.257	82.1667	15.0111	6329.5	75.5447	240.667	158.774	18592.7	422.474
2655.1	4143	425.148	4599.33	639.554	85.3333	14.6401	6327.33	94.733	247.5	155.734	18619.5	472.85
2670.1	4146.17	397.165	4596.17	659.091	79.5	18	6315.5	80.2994	235.5	145.558	18583.8	381.712
2685.1	4167.83	413.183	4619.17	634	79.5	14.7309	6320.83	94.1081	244.5	145.372	18633.8	377.365
2700.1	4178.5	400.401	4635.83	661.393	80.1667	13.5769	6332.83	82.2456	143.333	31.88	18621.7	423.623
[truncated: 132 more columns]
