# Supplementary material for: Structural, mechanistic, and physiological insights into phospholipase A-mediated membrane phospholipid degradation in Pseudomonas aeruginosa
Source: eLife. 2022 May 10;11:e72824. doi: 10.7554/eLife.72824 (PMC9132575; doi:10.7554/eLife.72824)
Supplement: Figure 2—source data 2. [file elife-72824-fig2-data2.xlsx]

## Sheet: PL lysoPL activities
			activity nmol/h*mg				Stabw nmol/h*mg
			Phospholipase A				PL
	PE	24:0	4.04102				0.0963953
		28:0	2.03511				0.234103
		32:0	1.57746				0.192791
		36:0	1.20744				0.302957
	PG	24:0	5.16405				1.71748
		28:0	2.11753				0.149055
		32:0	0				0
		36:0	0.335356				0.176155
	PC	24:0	3.1531				0.0868666
		28:0	2.11913				0.1303
		32:0	1.89391				0.217167
		36:0	1.04421				0.2606
	PA
	U/mg	Stabw U/mg	Tag der Messung	U/mg	Stabw U/mg		Mittelwert U/mg	Stabw U/mg			nmol/h*mg	Stabw nmol/h*mg
PE12	6.23193e-05	1.37708e-06	2016-05-18	7.23813e-05	1.8361e-06		6.73503e-05	1.60659e-06		PE12	4.04102	0.0963953
PE14	3.44054e-05	0	2016-05-18	3.34317e-05	7.80343e-06		3.39186e-05	3.90171e-06		PE14	2.03511	0.234103
PE16	2.92122e-05	0	2016-05-18	2.33697e-05	6.42635e-06		2.6291e-05	3.21318e-06		PE16	1.57746	0.192791
PE18	1.6229e-05	1.37708e-06	2016-05-18	2.40189e-05	8.72148e-06		2.01239e-05	5.04928e-06		PE18	1.20744	0.302957
	U/mg	Stabw U/mg	Tag der Messung	U/mg	Stabw U/mg
PG12	6.11203e-05	1.55794e-05	2016-05-18	0.000111014	4.16698e-05		8.60674e-05	2.86246e-05		PG12	5.16405	1.71748
PG14	3.89651e-05	4.51681e-07	2016-05-18	3.16193e-05	4.51681e-06		3.52922e-05	2.48424e-06		PG14	2.11753	0.149055
PG16	-1.05398e-05	4.51681e-07	2016-05-18	0	4.51681e-06		-5.26988e-06	2.48424e-06		PG16	-0.316193	0.149055
PG18	-2.55509e-06	0	2016-05-18	1.37336e-05	5.87185e-06		5.58926e-06	2.93592e-06		PG18	0.335356	0.176155
	U/mg	Stabw U/mg	Tag der Messung	U/mg	Stabw U/mg
PC12	4.98217e-05	4.82592e-07	2016-05-18	5.52816e-05	2.41296e-06		5.25516e-05	1.44778e-06		PC12	3.1531	0.0868666
PC14	2.96883e-05	1.44778e-06	2016-05-18	4.09493e-05	2.89555e-06		3.53188e-05	2.17167e-06		PC14	2.11913	0.1303
PC16	3.58307e-05	9.65185e-07	2016-05-18	2.72996e-05	6.2737e-06		3.15651e-05	3.61944e-06		PC16	1.89391	0.217167
PC18	1.3991e-05	9.65185e-07	2016-05-18	2.08159e-05	7.72148e-06		1.74035e-05	4.34333e-06		PC18	1.04421	0.2606
