# Supplementary material for: Structural, mechanistic, and physiological insights into phospholipase A-mediated membrane phospholipid degradation in Pseudomonas aeruginosa
Source: eLife. 2022 May 10;11:e72824. doi: 10.7554/eLife.72824 (PMC9132575; doi:10.7554/eLife.72824)
Supplement: Figure 5—figure supplement 1—source data 1. [file elife-72824-fig5-figsupp1-data1.xlsx]

## Sheet: Figure S10
		Ribonuklease A		BSA		PlaF-OG			Retention time [min]	RibA	BSA	PlaF	Myo	Myoglobine
		R.Time (min)	Intensity	R.Time (min)	Intensity	R.Time (min)	Intensity		0.2	0	0	0	0	R.Time (min)	Intensity
		0.2	0	0.2	0	0.2	0		0.20133	0	0.00112253	3.24507e-05	0.000376828	0.2	0
		0.20133	0	0.20133	6	0.20133	1		0.20267	-0.0028522	0.00261923	0.000129803	-0.00339145	0.20133	1
		0.20267	-3	0.20267	14	0.20267	4		0.204	-0.0028522	0.00280632	0.000129803	-0.00602925	0.20267	-9
		0.204	-3	0.204	15	0.204	4		0.20533	-0.00190147	0.00374176	-6.49014e-05	-0.00339145	0.204	-16
		0.20533	-2	0.20533	20	0.20533	-2		0.20667	-0.014261	0.00430302	0	-0.00715973	0.20533	-9
		0.20667	-15	0.20667	23	0.20667	0		0.208	-0.014261	0.00411593	0.000162254	-0.00565242	0.20667	-19
		0.208	-15	0.208	22	0.208	5		0.20933	-0.0114088	0.00318049	0.000259606	-0.00301462	0.208	-15
		0.20933	-12	0.20933	17	0.20933	8		0.21067	-0.0104581	0.00299341	0.000129803	-0.00414511	0.20933	-8
		0.21067	-11	0.21067	16	0.21067	4		0.212	-0.0123595	0.00411593	-0.000324507	-0.00188414	0.21067	-11
		0.212	-13	0.212	22	0.212	-10		0.21333	-0.00760586	0.0046772	-0.000292056	0.000753656	0.212	-5
		0.21333	-8	0.21333	25	0.21333	-9		0.21467	-0.00380293	0.00355467	-0.000129803	0.00150731	0.21333	2
		0.21467	-4	0.21467	19	0.21467	-4		0.216	-0.00665513	0.00355467	-9.73522e-05	-0.00226097	0.21467	4
		0.216	-7	0.216	19	0.216	-3		0.21733	-0.014261	0.00243214	0.000227155	-0.00226097	0.216	-6
		0.21733	-15	0.21733	13	0.21733	7		0.21867	-0.0190147	0.0014967	0.000194704	0	0.21733	-6
		0.21867	-20	0.21867	8	0.21867	6		0.22	-0.0180639	0.00261923	3.24507e-05	0.00150731	0.21867	0
		0.22	-19	0.22	14	0.22	1		0.22133	-0.0085566	0.00112253	0	-0.00226097	0.22	4
		0.22133	-9	0.22133	6	0.22133	0		0.22267	-0.0057044	0.000748352	-0.000259606	-0.00339145	0.22133	-6
		0.22267	-6	0.22267	4	0.22267	-8		0.224	-0.0104581	0.00187088	-0.000194704	-0.00527559	0.22267	-9
		0.224	-11	0.224	10	0.224	-6		0.22533	-0.0171132	0.00411593	-9.73522e-05	-0.00791339	0.224	-14
		0.22533	-18	0.22533	22	0.22533	-3		0.22667	-0.0180639	0.00243214	-0.000486761	-0.00452194	0.22533	-21
		0.22667	-19	0.22667	13	0.22667	-15		0.228	-0.0057044	0.00205797	-0.000713916	-0.00414511	0.22667	-12
		0.228	-6	0.228	11	0.228	-22		0.22933	-0.00665513	0.00243214	-0.000649014	-0.00527559	0.228	-11
		0.22933	-7	0.22933	13	0.22933	-20		0.23067	-0.0104581	0.000374176	-0.00045431	-0.00602925	0.22933	-14
		0.23067	-11	0.23067	2	0.23067	-14		0.232	0.00665513	0	-0.00045431	-0.00414511	0.23067	-16
		0.232	7	0.232	0	0.232	-14		0.23333	0.0028522	0	-0.000649014	-0.00678291	0.232	-11
		0.23333	3	0.23333	0	0.23333	-20		0.23467	-0.00380293	0.000374176	-0.000746366	-0.00904387	0.23333	-18
		0.23467	-4	0.23467	2	0.23467	-23		0.236	-0.00760586	0.00093544	-0.000778817	-0.00866705	0.23467	-24
		0.236	-8	0.236	5	0.236	-24		0.23733	-0.0028522	0.0014967	-0.00090862	-0.013189	0.236	-23
		0.23733	-3	0.23733	8	0.23733	-28		0.23867	-0.0152117	0.00243214	-0.000681465	-0.0143195	0.23733	-35
		0.23867	-16	0.23867	13	0.23867	-21		0.24	-0.0180639	0.00355467	-0.000324507	-0.0146963	0.23867	-38
		0.24	-19	0.24	19	0.24	-10		0.24133	-0.0104581	0.00411593	-6.49014e-05	-0.0143195	0.24	-39
		0.24133	-11	0.24133	22	0.24133	-2		0.24267	-0.0209161	0.00261923	-0.000746366	-0.0101744	0.24133	-38
		0.24267	-22	0.24267	14	0.24267	-23		0.244	-0.00950733	0.00168379	-0.000389409	-0.00829022	0.24267	-27
		0.244	-10	0.244	9	0.244	-12		0.24533	-0.00380293	0.00243214	-6.49014e-05	-0.00715973	0.244	-22
		0.24533	-4	0.24533	13	0.24533	-2		0.24667	-0.0161625	0.00243214	-0.000421859	-0.00565242	0.24533	-19
		0.24667	-17	0.24667	13	0.24667	-13		0.248	-0.0256698	0.00243214	-0.000876169	-0.00602925	0.24667	-15
		0.248	-27	0.248	13	0.248	-27		0.24933	-0.0152117	0.00261923	-0.000778817	-0.00866705	0.248	-16
		0.24933	-16	0.24933	14	0.24933	-24		0.25067	-0.0114088	0.00299341	-0.000649014	-0.0116817	0.24933	-23
		0.25067	-12	0.25067	16	0.25067	-20		0.252	-0.0256698	0.00336758	-0.000713916	-0.010928	0.25067	-31
		0.252	-27	0.252	18	0.252	-22		0.25333	-0.0304235	0.00411593	-0.000162254	-0.0105512	0.252	-29
		0.25333	-32	0.25333	22	0.25333	-5		0.25467	-0.0190147	0.00449011	3.24507e-05	-0.0113048	0.25333	-28
		0.25467	-20	0.25467	24	0.25467	1		0.256	-0.0057044	0.00430302	0	-0.0120585	0.25467	-30
		0.256	-6	0.256	23	0.256	0		0.25733	0.000950733	0.00430302	-9.73522e-05	-0.00904387	0.256	-32
		0.25733	1	0.25733	23	0.25733	-3		0.25867	0.00760586	0.00224506	-3.24507e-05	-0.0101744	0.25733	-24
		0.25867	8	0.25867	12	0.25867	-1		0.26	0.00475367	0.000187088	-0.000194704	-0.00979753	0.25867	-27
		0.26	5	0.26	1	0.26	-6		0.26133	0.000950733	0.00280632	-0.00045431	-0.00829022	0.26	-26
		0.26133	1	0.26133	15	0.26133	-14		0.26267	0.00190147	0.00130962	-0.000486761	-0.0101744	0.26133	-22
		0.26267	2	0.26267	7	0.26267	-15		0.264	-0.0028522	0.00187088	-0.000519211	-0.00866705	0.26267	-27
		0.264	-3	0.264	10	0.264	-16		0.26533	-0.0057044	0.00336758	-0.000486761	-0.00829022	0.264	-23
		0.26533	-6	0.26533	18	0.26533	-15		0.26667	-0.00665513	0.00093544	-0.000421859	-0.00979753	0.26533	-22
		0.26667	-7	0.26667	5	0.26667	-13		0.268	-0.00190147	-0.00205797	-0.000486761	-0.00753656	0.26667	-26
		0.268	-2	0.268	-11	0.268	-15		0.26933	-0.00760586	-0.00205797	-6.49014e-05	-0.00678291	0.268	-20
		0.26933	-8	0.26933	-11	0.26933	-2		0.27067	-0.00665513	0	0	-0.0094207	0.26933	-18
		0.27067	-7	0.27067	0	0.27067	0		0.272	0.000950733	-0.000374176	-0.000324507	-0.0162036	0.27067	-25
		0.272	1	0.272	-2	0.272	-10		0.27333	0.00665513	0.00168379	-0.000681465	-0.0139426	0.272	-43
		0.27333	7	0.27333	9	0.27333	-21		0.27467	0.0057044	0.00318049	-0.000681465	-0.0116817	0.27333	-37
		0.27467	6	0.27467	17	0.27467	-21		0.276	-0.00475367	0.00318049	-0.000649014	-0.0116817	0.27467	-31
		0.276	-5	0.276	17	0.276	-20		0.27733	-0.0161625	0.00243214	-0.000746366	-0.0162036	0.276	-31
		0.27733	-17	0.27733	13	0.27733	-23		0.27867	-0.0057044	0.00168379	-0.000681465	-0.0211024	0.27733	-43
		0.27867	-6	0.27867	9	0.27867	-21		0.28	0	0.00130962	-0.000486761	-0.0211024	0.27867	-56
		0.28	0	0.28	7	0.28	-15		0.28133	-0.00190147	0.00168379	-0.000292056	-0.0192182	0.28	-56
		0.28133	-2	0.28133	9	0.28133	-9		0.28267	-0.0085566	0.00355467	-0.000129803	-0.0192182	0.28133	-51
		0.28267	-9	0.28267	19	0.28267	-4		0.284	-0.00950733	0.00187088	-0.000162254	-0.0180877	0.28267	-51
		0.284	-10	0.284	10	0.284	-5		0.28533	0.0028522	-0.000748352	-0.000584113	-0.0169573	0.284	-48
		0.28533	3	0.28533	-4	0.28533	-18		0.28667	0.0104581	-0.00224506	-0.000843719	-0.0165804	0.28533	-45
		0.28667	11	0.28667	-12	0.28667	-26		0.288	0.0028522	0.000374176	-0.000649014	-0.0188414	0.28667	-44
		0.288	3	0.288	2	0.288	-20		0.28933	0	0.00168379	-0.000324507	-0.0214792	0.288	-50
		0.28933	0	0.28933	9	0.28933	-10		0.29067	-0.000950733	0.00205797	-0.000194704	-0.0207255	0.28933	-57
		0.29067	-1	0.29067	11	0.29067	-6		0.292	0	0.00243214	-0.000162254	-0.0180877	0.29067	-55
		0.292	0	0.292	13	0.292	-5		0.29333	0.00380293	0.00355467	0	-0.0150731	0.292	-48
		0.29333	4	0.29333	19	0.29333	0		0.29467	0.00380293	0.00299341	0.000194704	-0.0188414	0.29333	-40
		0.29467	4	0.29467	16	0.29467	6		0.296	0.00665513	0.00168379	0.000194704	-0.0195951	0.29467	-50
		0.296	7	0.296	9	0.296	6		0.29733	0.00760586	0.00168379	9.73522e-05	-0.0162036	0.296	-52
		0.29733	8	0.29733	9	0.29733	3		0.29867	-0.000950733	0.00392885	3.24507e-05	-0.0139426	0.29733	-43
		0.29867	-1	0.29867	21	0.29867	1		0.3	-0.00190147	0.00505137	-0.000162254	-0.0188414	0.29867	-37
		0.3	-2	0.3	27	0.3	-5		0.30133	0.00475367	0.00430302	-0.000421859	-0.0226097	0.3	-50
		0.30133	5	0.30133	23	0.30133	-13		0.30267	0.0123595	0.00112253	-0.000616564	-0.0229865	0.30133	-60
		0.30267	13	0.30267	6	0.30267	-19		0.304	0.0133103	0.000187088	-0.000421859	-0.0203487	0.30267	-61
		0.304	14	0.304	1	0.304	-13		0.30533	0.00665513	-0.000374176	-0.000584113	-0.0162036	0.304	-54
		0.30533	7	0.30533	-2	0.30533	-18		0.30667	-0.00475367	-0.000748352	-0.000584113	-0.0143195	0.30533	-43
		0.30667	-5	0.30667	-4	0.30667	-18		0.308	-0.0171132	0.00224506	-0.000421859	-0.0165804	0.30667	-38
		0.308	-18	0.308	12	0.308	-13		0.30933	-0.0247191	0.0014967	-0.000713916	-0.0222329	0.308	-44
		0.30933	-26	0.30933	8	0.30933	-22		0.31067	-0.00665513	0.000187088	-0.000584113	-0.0184646	0.30933	-59
		0.31067	-7	0.31067	1	0.31067	-18		0.312	0.00190147	0	-0.000616564	-0.01545	0.31067	-49
		0.312	2	0.312	0	0.312	-19		0.31333	-0.000950733	0.00112253	-0.00090862	-0.0207255	0.312	-41
		0.31333	-1	0.31333	6	0.31333	-28		0.31467	0.0085566	0.000374176	-0.00045431	-0.0184646	0.31333	-55
		0.31467	9	0.31467	2	0.31467	-14		0.316	0.0028522	-0.000561264	-0.000421859	-0.0180877	0.31467	-49
		0.316	3	0.316	-3	0.316	-13		0.31733	0.000950733	-0.000748352	-0.000616564	-0.0195951	0.316	-48
		0.31733	1	0.31733	-4	0.31733	-19		0.31867	0.00475367	-0.00112253	-0.000876169	-0.0203487	0.31733	-52
		0.31867	5	0.31867	-6	0.31867	-27		0.32	-0.0114088	-0.000374176	-0.000616564	-0.0207255	0.31867	-54
		0.32	-12	0.32	-2	0.32	-19		0.32133	-0.0180639	0.000374176	-0.000259606	-0.0203487	0.32	-55
		0.32133	-19	0.32133	2	0.32133	-8		0.32267	-0.0161625	0.000187088	-9.73522e-05	-0.0207255	0.32133	-54
		0.32267	-17	0.32267	1	0.32267	-3		0.324	-0.00760586	0.00224506	-0.000389409	-0.0237402	0.32267	-55
		0.324	-8	0.324	12	0.324	-12		0.32533	0.00190147	0.00168379	-0.000746366	-0.0192182	0.324	-63
		0.32533	2	0.32533	9	0.32533	-23		0.32667	-0.0057044	0.00168379	-0.000616564	-0.0214792	0.32533	-51
		0.32667	-6	0.32667	9	0.32667	-19		0.328	-0.0152117	0.00561264	-0.000389409	-0.0275085	0.32667	-57
		0.328	-16	0.328	30	0.328	-12		0.32933	-0.0152117	0.00224506	-0.00045431	-0.0244938	0.328	-73
		0.32933	-16	0.32933	12	0.32933	-14		0.33067	-0.0133103	0.0014967	-0.000584113	-0.0252475	0.32933	-65
		0.33067	-14	0.33067	8	0.33067	-18		0.332	-0.00950733	0.00318049	-0.000778817	-0.026378	0.33067	-67
		0.332	-10	0.332	17	0.332	-24		0.33333	-0.00950733	0.00505137	-0.000811268	-0.026378	0.332	-70
		0.33333	-10	0.33333	27	0.33333	-25		0.33467	-0.014261	0.00449011	-0.00045431	-0.0203487	0.33333	-70
		0.33467	-15	0.33467	24	0.33467	-14		0.336	-0.0218669	0.00318049	-0.000227155	-0.0229865	0.33467	-54
		0.336	-23	0.336	17	0.336	-7		0.33733	-0.0275713	0.00205797	-0.000194704	-0.0248707	0.336	-61
		0.33733	-29	0.33733	11	0.33733	-6		0.33867	-0.0294727	0.00355467	-0.000162254	-0.0226097	0.33733	-66
		0.33867	-31	0.33867	19	0.33867	-5		0.34	-0.028522	0.00280632	0.000356958	-0.0237402	0.33867	-60
		0.34	-30	0.34	15	0.34	11		0.34133	-0.0256698	0.00243214	0	-0.0244938	0.34	-63
		0.34133	-27	0.34133	13	0.34133	0		0.34267	-0.0228176	0.00243214	-0.000259606	-0.0256243	0.34133	-65
		0.34267	-24	0.34267	13	0.34267	-8		0.344	-0.0209161	0.00205797	-0.000259606	-0.026378	0.34267	-68
		0.344	-22	0.344	11	0.344	-8		0.34533	-0.0209161	0.00243214	-0.000194704	-0.0233633	0.344	-70
		0.34533	-22	0.34533	13	0.34533	-6		0.34667	-0.0218669	0.00224506	-0.000259606	-0.0207255	0.34533	-62
		0.34667	-23	0.34667	12	0.34667	-8		0.348	-0.0190147	0.00168379	-0.000292056	-0.0195951	0.34667	-55
		0.348	-20	0.348	9	0.348	-9		0.34933	-0.0133103	0.00168379	-0.000227155	-0.0211024	0.348	-52
		0.34933	-14	0.34933	9	0.34933	-7		0.35067	-0.0190147	0	-0.000421859	-0.0237402	0.34933	-56
		0.35067	-20	0.35067	0	0.35067	-13		0.352	-0.0161625	-0.00112253	-0.000389409	-0.0252475	0.35067	-63
		0.352	-17	0.352	-6	0.352	-12		0.35333	-0.0123595	-0.000374176	-0.000421859	-0.0252475	0.352	-67
		0.35333	-13	0.35333	-2	0.35333	-13		0.35467	-0.0104581	0.00093544	-0.000746366	-0.024117	0.35333	-67
		0.35467	-11	0.35467	5	0.35467	-23		0.356	-0.0190147	0.00280632	-0.00045431	-0.0237402	0.35467	-64
		0.356	-20	0.356	15	0.356	-14		0.35733	-0.028522	0.00355467	-0.000584113	-0.0256243	0.356	-63
		0.35733	-30	0.35733	19	0.35733	-18		0.35867	-0.0304235	0.00130962	-0.000713916	-0.0278853	0.35733	-68
		0.35867	-32	0.35867	7	0.35867	-22		0.36	-0.0209161	0.00093544	-0.000389409	-0.0271316	0.35867	-74
		0.36	-22	0.36	5	0.36	-12		0.36133	-0.0133103	0.00130962	-0.00045431	-0.0297694	0.36	-72
		0.36133	-14	0.36133	7	0.36133	-14		0.36267	-0.0123595	0.00168379	-0.000519211	-0.0297694	0.36133	-79
		0.36267	-13	0.36267	9	0.36267	-16		0.364	-0.0171132	0.00168379	-0.000584113	-0.0282621	0.36267	-79
		0.364	-18	0.364	9	0.364	-18		0.36533	-0.0256698	0.000374176	-0.000681465	-0.0301462	0.364	-75
		0.36533	-27	0.36533	2	0.36533	-21		0.36667	-0.0304235	0.000374176	-0.000746366	-0.0312767	0.36533	-80
		0.36667	-32	0.36667	2	0.36667	-23		0.368	-0.0332757	0.00130962	-0.00100597	-0.0312767	0.36667	-83
		0.368	-35	0.368	7	0.368	-31		0.36933	-0.0323249	0.00187088	-0.00126558	-0.0301462	0.368	-83
		0.36933	-34	0.36933	10	0.36933	-39		0.37067	-0.028522	0.00093544	-0.00103842	-0.0282621	0.36933	-80
		0.37067	-30	0.37067	5	0.37067	-32		0.372	-0.0114088	0.000748352	-0.000292056	-0.0260011	0.37067	-75
		0.372	-12	0.372	4	0.372	-9		0.37333	-0.00760586	0.00168379	3.24507e-05	-0.0260011	0.372	-69
		0.37333	-8	0.37333	9	0.37333	1		0.37467	-0.0152117	0.00224506	-3.24507e-05	-0.0278853	0.37333	-69
		0.37467	-16	0.37467	12	0.37467	-1		0.376	-0.0275713	0.00168379	-0.000162254	-0.0278853	0.37467	-74
		0.376	-29	0.376	9	0.376	-5		0.37733	-0.0275713	0.00130962	3.24507e-05	-0.0308999	0.376	-74
		0.37733	-29	0.37733	7	0.37733	1		0.37867	-0.0275713	0.000748352	9.73522e-05	-0.0308999	0.37733	-82
		0.37867	-29	0.37867	4	0.37867	3		0.38	-0.0275713	-0.0014967	-3.24507e-05	-0.0256243	0.37867	-82
		0.38	-29	0.38	-8	0.38	-1		0.38133	-0.0199654	0.000561264	9.73522e-05	-0.0244938	0.38	-68
		0.38133	-21	0.38133	3	0.38133	3		0.38267	-0.0161625	0.00130962	-0.000292056	-0.0271316	0.38133	-65
		0.38267	-17	0.38267	7	0.38267	-9		0.384	-0.0133103	-0.000374176	-0.000486761	-0.0286389	0.38267	-72
		0.384	-14	0.384	-2	0.384	-15		0.38533	-0.0104581	0.0014967	-0.000292056	-0.024117	0.384	-76
		0.38533	-11	0.38533	8	0.38533	-9		0.38667	-0.0104581	0.00130962	-0.000519211	-0.0275085	0.38533	-64
		0.38667	-11	0.38667	7	0.38667	-16		0.388	-0.0123595	0.00130962	-0.000584113	-0.0282621	0.38667	-73
		0.388	-13	0.388	7	0.388	-18		0.38933	-0.0180639	0.00355467	-0.000649014	-0.0278853	0.388	-75
		0.38933	-19	0.38933	19	0.38933	-20		0.39067	-0.028522	0.00355467	-0.000843719	-0.0308999	0.38933	-74
		0.39067	-30	0.39067	19	0.39067	-26		0.392	-0.0218669	0.00224506	-0.000941071	-0.0282621	0.39067	-82
		0.392	-23	0.392	12	0.392	-29		0.39333	-0.0199654	0.00112253	-0.00110332	-0.0275085	0.392	-75
		0.39333	-21	0.39333	6	0.39333	-34		0.39467	-0.0218669	0.00130962	-0.00103842	-0.0267548	0.39333	-73
		0.39467	-23	0.39467	7	0.39467	-32		0.396	-0.0256698	0.00243214	-0.00045431	-0.0233633	0.39467	-71
		0.396	-27	0.396	13	0.396	-14		0.39733	-0.0399308	0.00205797	-0.000486761	-0.0226097	0.396	-62
		0.39733	-42	0.39733	11	0.39733	-15		0.39867	-0.0370786	0.00168379	-0.000551662	-0.0229865	0.39733	-60
		0.39867	-39	0.39867	9	0.39867	-17		0.4	-0.0313742	0.00392885	-0.000584113	-0.024117	0.39867	-61
		0.4	-33	0.4	21	0.4	-18		0.40133	-0.0342264	0.00299341	-0.000551662	-0.0256243	0.4	-64
		0.40133	-36	0.40133	16	0.40133	-17		0.40267	-0.0218669	0.00280632	-0.00120068	-0.0305231	0.40133	-68
		0.40267	-23	0.40267	15	0.40267	-37		0.404	-0.0237683	0.00299341	-0.00107087	-0.0331609	0.40267	-81
		0.404	-25	0.404	16	0.404	-33		0.40533	-0.0313742	0.00261923	-0.000551662	-0.032784	0.404	-88
		0.40533	-33	0.40533	14	0.40533	-17		0.40667	-0.0342264	-0.000374176	-0.000486761	-0.0316536	0.40533	-87
		0.40667	-36	0.40667	-2	0.40667	-15		0.408	-0.0323249	-0.00112253	-0.000649014	-0.0312767	0.40667	-84
		0.408	-34	0.408	-6	0.408	-20		0.40933	-0.0275713	0	-0.000551662	-0.0286389	0.408	-83
		0.40933	-29	0.40933	0	0.40933	-17		0.41067	-0.0218669	0.000187088	-0.000324507	-0.0229865	0.40933	-76
		0.41067	-23	0.41067	1	0.41067	-10		0.412	-0.0161625	0.00243214	-0.000649014	-0.0256243	0.41067	-61
		0.412	-17	0.412	13	0.412	-20		0.41333	-0.0228176	0.00224506	-0.00107087	-0.026378	0.412	-68
		0.41333	-24	0.41333	12	0.41333	-33		0.41467	-0.0342264	0	-0.00100597	-0.0252475	0.41333	-70
		0.41467	-36	0.41467	0	0.41467	-31		0.416	-0.0437337	0.000748352	-0.000616564	-0.0226097	0.41467	-67
		0.416	-46	0.416	4	0.416	-19		0.41733	-0.0389801	0.00112253	-0.000746366	-0.0244938	0.416	-60
		0.41733	-41	0.41733	6	0.41733	-23		0.41867	-0.028522	0.000561264	-0.000713916	-0.0256243	0.41733	-65
		0.41867	-30	0.41867	3	0.41867	-22		0.42	-0.0266205	-0.000561264	-0.000746366	-0.0260011	0.41867	-68
		0.42	-28	0.42	-3	0.42	-23		0.42133	-0.0304235	-0.00112253	-0.000843719	-0.0260011	0.42	-69
		0.42133	-32	0.42133	-6	0.42133	-26		0.42267	-0.0228176	-0.000374176	-0.000616564	-0.0252475	0.42133	-69
		0.42267	-24	0.42267	-2	0.42267	-19		0.424	-0.028522	0.00093544	-0.000649014	-0.0256243	0.42267	-67
		0.424	-30	0.424	5	0.424	-20		0.42533	-0.0294727	0.00224506	-0.000876169	-0.0256243	0.424	-68
		0.42533	-31	0.42533	12	0.42533	-27		0.42667	-0.0247191	0.00112253	-0.00120068	-0.021856	0.42533	-68
		0.42667	-26	0.42667	6	0.42667	-37		0.428	-0.0294727	0.0014967	-0.000746366	-0.0211024	0.42667	-58
		0.428	-31	0.428	8	0.428	-23		0.42933	-0.0332757	0.00205797	-0.000713916	-0.0226097	0.428	-56
		0.42933	-35	0.42933	11	0.42933	-22		0.43067	-0.0323249	0.0014967	-0.000811268	-0.0248707	0.42933	-60
		0.43067	-34	0.43067	8	0.43067	-25		0.432	-0.0275713	0.00112253	-0.000713916	-0.0260011	0.43067	-66
		0.432	-29	0.432	6	0.432	-22		0.43333	-0.0361279	0.00112253	-0.000941071	-0.0286389	0.432	-69
		0.43333	-38	0.43333	6	0.43333	-29		0.43467	-0.0294727	0.00187088	-0.00100597	-0.0286389	0.43333	-76
		0.43467	-31	0.43467	10	0.43467	-31		0.436	-0.0209161	0.00224506	-0.00090862	-0.026378	0.43467	-76
		0.436	-22	0.436	12	0.436	-28		0.43733	-0.0218669	0.000748352	-0.000681465	-0.0244938	0.436	-70
		0.43733	-23	0.43733	4	0.43733	-21		0.43867	-0.0266205	0.0014967	-0.000876169	-0.0290158	0.43733	-65
		0.43867	-28	0.43867	8	0.43867	-27		0.44	-0.0256698	0.00299341	-0.000973522	-0.0278853	0.43867	-77
		0.44	-27	0.44	16	0.44	-30		0.44133	-0.0228176	0.0014967	-0.000941071	-0.0211024	0.44	-74
		0.44133	-24	0.44133	8	0.44133	-29		0.44267	-0.0266205	0.00112253	-0.000746366	-0.0226097	0.44133	-56
		0.44267	-28	0.44267	6	0.44267	-23		0.444	-0.0237683	0.00205797	-0.000973522	-0.0260011	0.44267	-60
		0.444	-25	0.444	11	0.444	-30		0.44533	-0.0275713	0.00280632	-0.00090862	-0.0256243	0.444	-69
		0.44533	-29	0.44533	15	0.44533	-28		0.44667	-0.0304235	-0.000561264	-0.000681465	-0.0222329	0.44533	-68
		0.44667	-32	0.44667	-3	0.44667	-21		0.448	-0.0199654	0.000748352	-0.000778817	-0.0237402	0.44667	-59
		0.448	-21	0.448	4	0.448	-24		0.44933	-0.0275713	0.00130962	-0.000519211	-0.0226097	0.448	-63
		0.44933	-29	0.44933	7	0.44933	-16		0.45067	-0.0323249	0.000187088	-0.000551662	-0.0226097	0.44933	-60
		0.45067	-34	0.45067	1	0.45067	-17		0.452	-0.0361279	0.00130962	-0.000843719	-0.0271316	0.45067	-60
		0.452	-38	0.452	7	0.452	-26		0.45333	-0.0446845	0.00168379	-0.000778817	-0.026378	0.452	-72
		0.45333	-47	0.45333	9	0.45333	-24		0.45467	-0.0399308	0.00205797	-0.000876169	-0.026378	0.45333	-70
		0.45467	-42	0.45467	11	0.45467	-27		0.456	-0.0342264	0.00280632	-0.000973522	-0.026378	0.45467	-70
		0.456	-36	0.456	15	0.456	-30		0.45733	-0.0332757	0.00112253	-0.00100597	-0.0252475	0.456	-70
		0.45733	-35	0.45733	6	0.45733	-31		0.45867	-0.0389801	0.00187088	-0.00100597	-0.0275085	0.45733	-67
		0.45867	-41	0.45867	10	0.45867	-31		0.46	-0.0418323	0.00280632	-0.000876169	-0.0252475	0.45867	-73
		0.46	-44	0.46	15	0.46	-27		0.46133	-0.0380293	0.00280632	-0.000778817	-0.0237402	0.46	-67
		0.46133	-40	0.46133	15	0.46133	-24		0.46267	-0.0266205	0.00392885	-0.000811268	-0.0293926	0.46133	-63
		0.46267	-28	0.46267	21	0.46267	-25		0.464	-0.0237683	0.00187088	-0.000584113	-0.0286389	0.46267	-78
		0.464	-25	0.464	10	0.464	-18		0.46533	-0.0389801	-0.000561264	-0.000973522	-0.0275085	0.464	-76
		0.46533	-41	0.46533	-3	0.46533	-30		0.46667	-0.0484874	-0.000561264	-0.00129803	-0.0275085	0.46533	-73
		0.46667	-51	0.46667	-3	0.46667	-40		0.468	-0.0399308	-0.00112253	-0.00107087	-0.0293926	0.46667	-73
		0.468	-42	0.468	-6	0.468	-33		0.46933	-0.0361279	0.0014967	-0.00103842	-0.0286389	0.468	-78
		0.46933	-38	0.46933	8	0.46933	-32		0.47067	-0.0256698	0.00449011	-0.00123313	-0.0275085	0.46933	-76
		0.47067	-27	0.47067	24	0.47067	-38		0.472	-0.0237683	0.00449011	-0.00133048	-0.0275085	0.47067	-73
		0.472	-25	0.472	24	0.472	-41		0.47333	-0.042783	0.00243214	-0.00090862	-0.0320304	0.472	-73
		0.47333	-45	0.47333	13	0.47333	-28		0.47467	-0.0446845	0.000748352	-0.000973522	-0.0335377	0.47333	-85
		0.47467	-47	0.47467	4	0.47467	-30		0.476	-0.0465859	0.000374176	-0.00113578	-0.0312767	0.47467	-89
		0.476	-49	0.476	2	0.476	-35		0.47733	-0.0465859	0.00318049	-0.00120068	-0.0271316	0.476	-83
		0.47733	-49	0.47733	17	0.47733	-37		0.47867	-0.0389801	0.00130962	-0.00107087	-0.0278853	0.47733	-72
		0.47867	-41	0.47867	7	0.47867	-33		0.48	-0.0294727	0.00130962	-0.00113578	-0.0293926	0.47867	-74
		0.48	-31	0.48	7	0.48	-35		0.48133	-0.0247191	0.00261923	-0.000973522	-0.0301462	0.48	-78
		0.48133	-26	0.48133	14	0.48133	-30		0.48267	-0.028522	0.00243214	-0.000746366	-0.0293926	0.48133	-80
		0.48267	-30	0.48267	13	0.48267	-23		0.484	-0.0446845	0.00224506	-0.000973522	-0.0297694	0.48267	-78
		0.484	-47	0.484	12	0.484	-30		0.48533	-0.0522903	0.00224506	-0.00100597	-0.0331609	0.484	-79
		0.48533	-55	0.48533	12	0.48533	-31		0.48667	-0.0484874	0.00224506	-0.000843719	-0.0346682	0.48533	-88
		0.48667	-51	0.48667	12	0.48667	-26		0.488	-0.0361279	0.00299341	-0.000649014	-0.032784	0.48667	-92
		0.488	-38	0.488	16	0.488	-20		0.48933	-0.0209161	0.000748352	-0.000811268	-0.0305231	0.488	-87
		0.48933	-22	0.48933	4	0.48933	-25		0.49067	-0.0275713	0	-0.000811268	-0.0312767	0.48933	-81
		0.49067	-29	0.49067	0	0.49067	-25		0.492	-0.0323249	0.00187088	-0.000941071	-0.0320304	0.49067	-83
		0.492	-34	0.492	10	0.492	-29		0.49333	-0.0332757	0.00205797	-0.00129803	-0.0305231	0.492	-85
		0.49333	-35	0.49333	11	0.49333	-40		0.49467	-0.0418323	0.00187088	-0.00136293	-0.0312767	0.49333	-81
		0.49467	-44	0.49467	10	0.49467	-42		0.496	-0.0456352	0.0014967	-0.00113578	-0.0312767	0.49467	-83
		0.496	-48	0.496	8	0.496	-35		0.49733	-0.042783	0.00093544	-0.000941071	-0.0293926	0.496	-83
		0.49733	-45	0.49733	5	0.49733	-29		0.49867	-0.0342264	0.00093544	-0.000843719	-0.0252475	0.49733	-78
		0.49867	-36	0.49867	5	0.49867	-26		0.5	-0.0370786	0.000748352	-0.00113578	-0.026378	0.49867	-67
		0.5	-39	0.5	4	0.5	-35		0.50133	-0.0266205	0.00112253	-0.000973522	-0.026378	0.5	-70
		0.50133	-28	0.50133	6	0.50133	-30		0.50267	-0.0190147	0.00243214	-0.000876169	-0.0256243	0.50133	-70
		0.50267	-20	0.50267	13	0.50267	-27		0.504	-0.0266205	0.00224506	-0.00123313	-0.0275085	0.50267	-68
		0.504	-28	0.504	12	0.504	-38		0.50533	-0.0370786	0.00318049	-0.00116823	-0.0305231	0.504	-73
		0.50533	-39	0.50533	17	0.50533	-36		0.50667	-0.0361279	0.00355467	-0.000973522	-0.0286389	0.50533	-81
		0.50667	-38	0.50667	19	0.50667	-30		0.508	-0.0304235	0.000561264	-0.000778817	-0.0244938	0.50667	-76
		0.508	-32	0.508	3	0.508	-24		0.50933	-0.0275713	-0.000748352	-0.000681465	-0.0260011	0.508	-65
		0.50933	-29	0.50933	-4	0.50933	-21		0.51067	-0.0209161	-0.00205797	-0.000681465	-0.0271316	0.50933	-69
		0.51067	-22	0.51067	-11	0.51067	-21		0.512	-0.0218669	-0.00280632	-0.000778817	-0.0278853	0.51067	-72
		0.512	-23	0.512	-15	0.512	-24		0.51333	-0.0247191	-0.00093544	-0.00090862	-0.0293926	0.512	-74
		0.51333	-26	0.51333	-5	0.51333	-28		0.51467	-0.0218669	0.000187088	-0.000778817	-0.0354218	0.51333	-78
		0.51467	-23	0.51467	1	0.51467	-24		0.516	-0.0323249	-0.000187088	-0.000811268	-0.0357987	0.51467	-94
		0.516	-34	0.516	-1	0.516	-25		0.51733	-0.0408815	-0.00093544	-0.00090862	-0.0324072	0.516	-95
		0.51733	-43	0.51733	-5	0.51733	-28		0.51867	-0.042783	0.00112253	-0.00110332	-0.0278853	0.51733	-86
		0.51867	-45	0.51867	6	0.51867	-34		0.52	-0.0313742	-0.000561264	-0.00142783	-0.0324072	0.51867	-74
		0.52	-33	0.52	-3	0.52	-44		0.52133	-0.0418323	-0.00112253	-0.00149273	-0.035045	0.52	-86
		0.52133	-44	0.52133	-6	0.52133	-46		0.52267	-0.042783	-0.000748352	-0.00126558	-0.0361755	0.52133	-93
		0.52267	-45	0.52267	-4	0.52267	-39		0.524	-0.0351771	-0.00205797	-0.00090862	-0.0354218	0.52267	-96
		0.524	-37	0.524	-11	0.524	-28		0.52533	-0.0380293	-0.000748352	-0.00110332	-0.0290158	0.524	-94
		0.52533	-40	0.52533	-4	0.52533	-34		0.52667	-0.042783	-0.000187088	-0.00136293	-0.0275085	0.52533	-77
		0.52667	-45	0.52667	-1	0.52667	-42		0.528	-0.0503888	-0.00112253	-0.00139538	-0.0267548	0.52667	-73
		0.528	-53	0.528	-6	0.528	-43		0.52933	-0.0551425	-0.00187088	-0.00126558	-0.0244938	0.528	-71
		0.52933	-58	0.52933	-10	0.52933	-39		0.53067	-0.0370786	-0.000748352	-0.00146028	-0.0278853	0.52933	-65
		0.53067	-39	0.53067	-4	0.53067	-45		0.532	-0.0332757	0.000187088	-0.00159009	-0.0282621	0.53067	-74
		0.532	-35	0.532	1	0.532	-49		0.53333	-0.0418323	-0.00112253	-0.00168744	-0.0278853	0.532	-75
		0.53333	-44	0.53333	-6	0.53333	-52		0.53467	-0.0551425	-0.00318049	-0.00181724	-0.0305231	0.53333	-74
		0.53467	-58	0.53467	-17	0.53467	-56		0.536	-0.0446845	-0.00318049	-0.00201194	-0.0342914	0.53467	-81
		0.536	-47	0.536	-17	0.536	-62		0.53733	-0.0408815	-0.00261923	-0.00175234	-0.0361755	0.536	-91
		0.53733	-43	0.53733	-14	0.53733	-54		0.53867	-0.042783	-0.00224506	-0.00149273	-0.0361755	0.53733	-96
		0.53867	-45	0.53867	-12	0.53867	-46		0.54	-0.042783	-0.00299341	-0.00165499	-0.035045	0.53867	-96
		0.54	-45	0.54	-16	0.54	-51		0.54133	-0.0408815	-0.00299341	-0.0020444	-0.0346682	0.54	-93
		0.54133	-43	0.54133	-16	0.54133	-63		0.54267	-0.0456352	-0.00299341	-0.00181724	-0.0342914	0.54133	-92
		0.54267	-48	0.54267	-16	0.54267	-56		0.544	-0.0513396	-0.00336758	-0.00146028	-0.0339145	0.54267	-91
		0.544	-54	0.544	-18	0.544	-45		0.54533	-0.0541918	-0.00336758	-0.00152518	-0.032784	0.544	-90
		0.54533	-57	0.54533	-18	0.54533	-47		0.54667	-0.0503888	-0.00243214	-0.00152518	-0.0335377	0.54533	-87
		0.54667	-53	0.54667	-13	0.54667	-47		0.548	-0.0513396	-0.00130962	-0.00159009	-0.0339145	0.54667	-89
		0.548	-54	0.548	-7	0.548	-49		0.54933	-0.057044	-0.000748352	-0.00171989	-0.0331609	0.548	-90
		0.54933	-60	0.54933	-4	0.54933	-53		0.55067	-0.0646498	0.000748352	-0.00184969	-0.0316536	0.54933	-88
		0.55067	-68	0.55067	4	0.55067	-57		0.552	-0.0522903	0.00093544	-0.00201194	-0.0324072	0.55067	-84
		0.552	-55	0.552	5	0.552	-62		0.55333	-0.0513396	-0.000187088	-0.0021742	-0.0335377	0.552	-86
		0.55333	-54	0.55333	-1	0.55333	-67		0.55467	-0.0551425	-0.00280632	-0.00233645	-0.0342914	0.55333	-89
		0.55467	-58	0.55467	-15	0.55467	-72		0.556	-0.0494381	-0.00112253	-0.002304	-0.037306	0.55467	-91
		0.556	-52	0.556	-6	0.556	-71		0.55733	-0.0522903	0.000561264	-0.0022391	-0.0380596	0.556	-99
		0.55733	-55	0.55733	3	0.55733	-69		0.55867	-0.0551425	0.00093544	-0.0020444	-0.0376828	0.55733	-101
		0.55867	-58	0.55867	5	0.55867	-63		0.56	-0.0589454	-0.000374176	-0.00178479	-0.0365523	0.55867	-100
		0.56	-62	0.56	-2	0.56	-55		0.56133	-0.0656006	-0.00130962	-0.0021093	-0.0308999	0.56	-97
		0.56133	-69	0.56133	-7	0.56133	-65		0.56267	-0.0665513	-0.00112253	-0.00188214	-0.0324072	0.56133	-82
		0.56267	-70	0.56267	-6	0.56267	-58		0.564	-0.0646498	-0.000187088	-0.00159009	-0.0342914	0.56267	-86
		0.564	-68	0.564	-1	0.564	-49		0.56533	-0.0627484	-0.00205797	-0.00149273	-0.0324072	0.564	-91
		0.56533	-66	0.56533	-11	0.56533	-46		0.56667	-0.0627484	-0.0014967	-0.00214175	-0.0342914	0.56533	-86
		0.56667	-66	0.56667	-8	0.56667	-66		0.568	-0.067502	-0.000374176	-0.002304	-0.0369292	0.56667	-91
		0.568	-71	0.568	-2	0.568	-71		0.56933	-0.0656006	0.000374176	-0.00227155	-0.0361755	0.568	-98
		0.56933	-69	0.56933	2	0.56933	-70		0.57067	-0.0560932	0.00112253	-0.0022391	-0.0286389	0.56933	-96
		0.57067	-59	0.57067	6	0.57067	-69		0.572	-0.0617976	0.00112253	-0.00201194	-0.0267548	0.57067	-76
		0.572	-65	0.572	6	0.572	-62		0.57333	-0.0598962	0.000561264	-0.00188214	-0.0290158	0.572	-71
		0.57333	-63	0.57333	3	0.57333	-58		0.57467	-0.0551425	-0.00093544	-0.00188214	-0.0320304	0.57333	-77
		0.57467	-58	0.57467	-5	0.57467	-58		0.576	-0.0494381	-0.00299341	-0.0020444	-0.032784	0.57467	-85
		0.576	-52	0.576	-16	0.576	-63		0.57733	-0.0541918	-0.0014967	-0.00220665	-0.032784	0.576	-87
		0.57733	-57	0.57733	-8	0.57733	-68		0.57867	-0.0617976	0.000561264	-0.00191459	-0.0335377	0.57733	-87
		0.57867	-65	0.57867	3	0.57867	-59		0.58	-0.067502	0	-0.00155763	-0.0339145	0.57867	-89
		0.58	-71	0.58	0	0.58	-48		0.58133	-0.0665513	-0.00299341	-0.00149273	-0.0305231	0.58	-90
		0.58133	-70	0.58133	-16	0.58133	-46		0.58267	-0.0636991	-0.00449011	-0.00139538	-0.0339145	0.58133	-81
		0.58267	-67	0.58267	-24	0.58267	-43		0.584	-0.067502	-0.00430302	-0.00162254	-0.0369292	0.58267	-90
		0.584	-71	0.584	-23	0.584	-50		0.58533	-0.0732064	-0.00280632	-0.00207685	-0.037306	0.584	-98
		0.58533	-77	0.58533	-15	0.58533	-64		0.58667	-0.0732064	-0.00205797	-0.0024338	-0.0320304	0.58533	-99
		0.58667	-77	0.58667	-11	0.58667	-75		0.588	-0.0684528	-0.0014967	-0.00253116	-0.0320304	0.58667	-85
		0.588	-72	0.588	-8	0.588	-78		0.58933	-0.0627484	-0.00130962	-0.00246625	-0.0316536	0.588	-85
		0.58933	-66	0.58933	-7	0.58933	-76		0.59067	-0.0598962	-0.00168379	-0.0023689	-0.0297694	0.58933	-84
		0.59067	-63	0.59067	-9	0.59067	-73		0.592	-0.0636991	0	-0.0022391	-0.0320304	0.59067	-79
		0.592	-67	0.592	0	0.592	-69		0.59333	-0.0665513	0	-0.002304	-0.0357987	0.592	-85
		0.59333	-70	0.59333	0	0.59333	-71		0.59467	-0.0656006	-0.00130962	-0.00227155	-0.0361755	0.59333	-95
		0.59467	-69	0.59467	-7	0.59467	-70		0.596	-0.067502	-0.000374176	-0.0020444	-0.0316536	0.59467	-96
		0.596	-71	0.596	-2	0.596	-63		0.59733	-0.085566	-0.00224506	-0.00181724	-0.0324072	0.596	-84
		0.59733	-90	0.59733	-12	0.59733	-56		0.59867	-0.0912704	-0.00299341	-0.00175234	-0.0331609	0.59733	-86
		0.59867	-96	0.59867	-16	0.59867	-54		0.6	-0.0922211	-0.00112253	-0.00201194	-0.0346682	0.59867	-88
		0.6	-97	0.6	-6	0.6	-62		0.60133	-0.0874674	-0.00112253	-0.00249871	-0.0369292	0.6	-92
		0.60133	-92	0.60133	-6	0.60133	-77		0.60267	-0.0760586	-0.00261923	-0.002304	-0.0342914	0.60133	-98
		0.60267	-80	0.60267	-14	0.60267	-71		0.604	-0.0789108	-0.00318049	-0.00207685	-0.0335377	0.60267	-91
		0.604	-83	0.604	-17	0.604	-64		0.60533	-0.0789108	-0.00187088	-0.0021742	-0.035045	0.604	-89
		0.60533	-83	0.60533	-10	0.60533	-67		0.60667	-0.0732064	-0.00355467	-0.00266096	-0.037306	0.60533	-93
		0.60667	-77	0.60667	-19	0.60667	-82		0.608	-0.0741572	-0.00374176	-0.0021093	-0.0320304	0.60667	-99
		0.608	-78	0.608	-20	0.608	-65		0.60933	-0.0694035	-0.00318049	-0.00191459	-0.0324072	0.608	-85
		0.60933	-73	0.60933	-17	0.60933	-59		0.61067	-0.0665513	-0.00355467	-0.0021742	-0.0346682	0.60933	-86
		0.61067	-70	0.61067	-19	0.61067	-67		0.612	-0.0665513	-0.00224506	-0.00275831	-0.0316536	0.61067	-92
		0.612	-70	0.612	-12	0.612	-85		0.61333	-0.0694035	-0.000561264	-0.0024338	-0.0316536	0.612	-84
		0.61333	-73	0.61333	-3	0.61333	-75		0.61467	-0.0656006	-0.000374176	-0.00246625	-0.0312767	0.61333	-84
		0.61467	-69	0.61467	-2	0.61467	-76		0.616	-0.0579947	-0.00336758	-0.00262851	-0.0308999	0.61467	-83
		0.616	-61	0.616	-18	0.616	-81		0.61733	-0.0494381	-0.00280632	-0.00262851	-0.0331609	0.616	-82
		0.61733	-52	0.61733	-15	0.61733	-81		0.61867	-0.0732064	-0.00318049	-0.00253116	-0.0316536	0.61733	-88
		0.61867	-77	0.61867	-17	0.61867	-78		0.62	-0.0722557	-0.00486429	-0.00259606	-0.0320304	0.61867	-84
		0.62	-76	0.62	-26	0.62	-80		0.62133	-0.0636991	-0.00673517	-0.00269341	-0.0346682	0.62	-85
		0.62133	-67	0.62133	-36	0.62133	-83		0.62267	-0.0722557	-0.00561264	-0.00249871	-0.0361755	0.62133	-92
		0.62267	-76	0.62267	-30	0.62267	-77		0.624	-0.0665513	-0.00523846	-0.0024338	-0.0380596	0.62267	-96
		0.624	-70	0.624	-28	0.624	-75		0.62533	-0.0636991	-0.0046772	-0.0024338	-0.0388133	0.624	-101
		0.62533	-67	0.62533	-25	0.62533	-75		0.62667	-0.0617976	-0.000748352	-0.0024338	-0.0384365	0.62533	-103
		0.62667	-65	0.62667	-4	0.62667	-75		0.628	-0.0541918	-0.00280632	-0.0021742	-0.037306	0.62667	-102
		0.628	-57	0.628	-15	0.628	-67		0.62933	-0.0494381	-0.00430302	-0.0021093	-0.0365523	0.628	-99
		0.62933	-52	0.62933	-23	0.62933	-65		0.63067	-0.0579947	-0.00411593	-0.00220665	-0.0361755	0.62933	-97
		0.63067	-61	0.63067	-22	0.63067	-68		0.632	-0.0751079	-0.00336758	-0.00249871	-0.0354218	0.63067	-96
		0.632	-79	0.632	-18	0.632	-77		0.63333	-0.081763	-0.0046772	-0.00269341	-0.0346682	0.632	-94
		0.63333	-86	0.63333	-25	0.63333	-83		0.63467	-0.0760586	-0.00561264	-0.00285566	-0.0324072	0.63333	-92
		0.63467	-80	0.63467	-30	0.63467	-88		0.636	-0.0703542	-0.00505137	-0.00285566	-0.032784	0.63467	-86
		0.636	-74	0.636	-27	0.636	-88		0.63733	-0.0656006	-0.00449011	-0.00269341	-0.0376828	0.636	-87
		0.63733	-69	0.63733	-24	0.63733	-83		0.63867	-0.0656006	-0.00355467	-0.00240135	-0.0361755	0.63733	-100
		0.63867	-69	0.63867	-19	0.63867	-74		0.64	-0.0608469	-0.00392885	-0.0024338	-0.0346682	0.63867	-96
		0.64	-64	0.64	-21	0.64	-75		0.64133	-0.0617976	-0.00598681	-0.00249871	-0.0346682	0.64	-92
		0.64133	-65	0.64133	-32	0.64133	-77		0.64267	-0.0722557	-0.00542555	-0.00240135	-0.0369292	0.64133	-92
		0.64267	-76	0.64267	-29	0.64267	-74		0.644	-0.0722557	-0.00430302	-0.002304	-0.0354218	0.64267	-98
		0.644	-76	0.644	-23	0.644	-71		0.64533	-0.071305	-0.00411593	-0.002304	-0.0369292	0.644	-94
		0.64533	-75	0.64533	-22	0.64533	-71		0.64667	-0.0732064	-0.00505137	-0.002304	-0.0395669	0.64533	-98
		0.64667	-77	0.64667	-27	0.64667	-71		0.648	-0.0770094	-0.0046772	-0.002304	-0.0391901	0.64667	-105
		0.648	-81	0.648	-25	0.648	-71		0.64933	-0.0808123	-0.00523846	-0.00279076	-0.0346682	0.648	-104
		0.64933	-85	0.64933	-28	0.64933	-86		0.65067	-0.0770094	-0.00598681	-0.00272586	-0.032784	0.64933	-92
		0.65067	-81	0.65067	-32	0.65067	-84		0.652	-0.071305	-0.00523846	-0.0024338	-0.0324072	0.65067	-87
		0.652	-75	0.652	-28	0.652	-75		0.65333	-0.0703542	-0.00523846	-0.00249871	-0.0316536	0.652	-86
		0.65333	-74	0.65333	-28	0.65333	-77		0.65467	-0.0732064	-0.0046772	-0.00266096	-0.0324072	0.65333	-84
		0.65467	-77	0.65467	-25	0.65467	-82		0.656	-0.071305	-0.00449011	-0.00262851	-0.0335377	0.65467	-86
		0.656	-75	0.656	-24	0.656	-81		0.65733	-0.0684528	-0.00673517	-0.00256361	-0.0346682	0.656	-89
		0.65733	-72	0.65733	-36	0.65733	-79		0.65867	-0.0703542	-0.00542555	-0.00262851	-0.0361755	0.65733	-92
		0.65867	-74	0.65867	-29	0.65867	-81		0.66	-0.0779601	-0.00561264	-0.00240135	-0.0335377	0.65867	-96
		0.66	-82	0.66	-30	0.66	-74		0.66133	-0.0770094	-0.00692225	-0.00214175	-0.0342914	0.66	-89
		0.66133	-81	0.66133	-37	0.66133	-66		0.66267	-0.071305	-0.00767061	-0.00184969	-0.0395669	0.66133	-91
		0.66267	-75	0.66267	-41	0.66267	-57		0.664	-0.067502	-0.00804478	-0.00165499	-0.0384365	0.66267	-105
		0.664	-71	0.664	-43	0.664	-51		0.66533	-0.0684528	-0.00748352	-0.00184969	-0.0388133	0.664	-102
		0.66533	-72	0.66533	-40	0.66533	-57		0.66667	-0.0741572	-0.00673517	-0.00197949	-0.0391901	0.66533	-103
		0.66667	-78	0.66667	-36	0.66667	-61		0.668	-0.0798616	-0.00710934	-0.00201194	-0.037306	0.66667	-104
		0.668	-84	0.668	-38	0.668	-62		0.66933	-0.0789108	-0.00710934	-0.00214175	-0.0357987	0.668	-99
		0.66933	-83	0.66933	-38	0.66933	-66		0.67067	-0.0722557	-0.00767061	-0.00240135	-0.0357987	0.66933	-95
		0.67067	-76	0.67067	-41	0.67067	-74		0.672	-0.0703542	-0.00879313	-0.00249871	-0.0369292	0.67067	-95
		0.672	-74	0.672	-47	0.672	-77		0.67333	-0.0703542	-0.00879313	-0.00240135	-0.0384365	0.672	-98
		0.67333	-74	0.67333	-47	0.67333	-74		0.67467	-0.0646498	-0.0061739	-0.00272586	-0.0339145	0.67333	-102
		0.67467	-68	0.67467	-33	0.67467	-84		0.676	-0.0608469	-0.00430302	-0.00266096	-0.0320304	0.67467	-90
		0.676	-64	0.676	-23	0.676	-82		0.67733	-0.057044	-0.00486429	-0.00256361	-0.032784	0.676	-85
		0.67733	-60	0.67733	-26	0.67733	-79		0.67867	-0.0551425	-0.00355467	-0.00266096	-0.0357987	0.67733	-87
		0.67867	-58	0.67867	-19	0.67867	-82		0.68	-0.0770094	-0.00579973	-0.00266096	-0.035045	0.67867	-95
		0.68	-81	0.68	-31	0.68	-82		0.68133	-0.0779601	-0.00860605	-0.00272586	-0.0346682	0.68	-93
		0.68133	-82	0.68133	-46	0.68133	-84		0.68267	-0.0722557	-0.00916731	-0.00285566	-0.0357987	0.68133	-92
		0.68267	-76	0.68267	-49	0.68267	-88		0.684	-0.0703542	-0.00916731	-0.00305037	-0.0399438	0.68267	-95
		0.684	-74	0.684	-49	0.684	-94		0.68533	-0.0732064	-0.00879313	-0.00262851	-0.0410743	0.684	-106
		0.68533	-77	0.68533	-47	0.68533	-81		0.68667	-0.081763	-0.00785769	-0.00227155	-0.037306	0.68533	-109
		0.68667	-86	0.68667	-42	0.68667	-70		0.688	-0.081763	-0.00598681	-0.0021093	-0.0316536	0.68667	-99
		0.688	-86	0.688	-32	0.688	-65		0.68933	-0.0598962	-0.00692225	-0.00207685	-0.0301462	0.688	-84
		0.68933	-63	0.68933	-37	0.68933	-64		0.69067	-0.0617976	-0.00748352	-0.002304	-0.0357987	0.68933	-80
		0.69067	-65	0.69067	-40	0.69067	-71		0.692	-0.0732064	-0.00823187	-0.00249871	-0.0369292	0.69067	-95
		0.692	-77	0.692	-44	0.692	-77		0.69333	-0.0827138	-0.0102898	-0.00262851	-0.0339145	0.692	-98
		0.69333	-87	0.69333	-55	0.69333	-81		0.69467	-0.0836645	-0.0110382	-0.00266096	-0.0388133	0.69333	-90
		0.69467	-88	0.69467	-59	0.69467	-82		0.696	-0.0827138	-0.0102898	-0.00259606	-0.0425816	0.69467	-103
		0.696	-87	0.696	-55	0.696	-80		0.69733	-0.0884182	-0.00898022	-0.00249871	-0.0414511	0.696	-113
		0.69733	-93	0.69733	-48	0.69733	-77		0.69867	-0.0941226	-0.00841896	-0.00240135	-0.0357987	0.69733	-110
		0.69867	-99	0.69867	-45	0.69867	-74		0.7	-0.0846152	-0.00729643	-0.0024338	-0.0342914	0.69867	-95
		0.7	-89	0.7	-39	0.7	-75		0.70133	-0.0922211	-0.00785769	-0.0020444	-0.0369292	0.7	-91
		0.70133	-97	0.70133	-42	0.70133	-63		0.70267	-0.0922211	-0.00954148	-0.00197949	-0.0376828	0.70133	-98
		0.70267	-97	0.70267	-51	0.70267	-61		0.704	-0.085566	-0.00767061	-0.002304	-0.0342914	0.70267	-100
		0.704	-90	0.704	-41	0.704	-71		0.70533	-0.0903196	-0.00860605	-0.00227155	-0.0324072	0.704	-91
		0.70533	-95	0.70533	-46	0.70533	-70		0.70667	-0.0922211	-0.00860605	-0.002304	-0.0354218	0.70533	-86
		0.70667	-97	0.70667	-46	0.70667	-71		0.708	-0.0903196	-0.00710934	-0.00233645	-0.0391901	0.70667	-94
		0.708	-95	0.708	-38	0.708	-72		0.70933	-0.0846152	-0.00879313	-0.0023689	-0.0403206	0.708	-104
		0.70933	-89	0.70933	-47	0.70933	-73		0.71067	-0.0836645	-0.00879313	-0.0023689	-0.0395669	0.70933	-107
		0.71067	-88	0.71067	-47	0.71067	-73		0.712	-0.0827138	-0.00785769	-0.00201194	-0.0380596	0.71067	-105
		0.712	-87	0.712	-42	0.712	-62		0.71333	-0.0874674	-0.00636099	-0.00197949	-0.0365523	0.712	-101
		0.71333	-92	0.71333	-34	0.71333	-61		0.71467	-0.0988762	-0.00729643	-0.00266096	-0.0354218	0.71333	-97
		0.71467	-104	0.71467	-39	0.71467	-82		0.716	-0.0874674	-0.0093544	-0.00266096	-0.0414511	0.71467	-94
		0.716	-92	0.716	-50	0.716	-82		0.71733	-0.104581	-0.00916731	-0.002304	-0.0425816	0.716	-110
		0.71733	-110	0.71733	-49	0.71733	-71		0.71867	-0.114088	-0.00449011	-0.00233645	-0.0406974	0.71733	-113
		0.71867	-120	0.71867	-24	0.71867	-72		0.72	-0.0979255	-0.00579973	-0.00318017	-0.0406974	0.71867	-108
		0.72	-103	0.72	-31	0.72	-98		0.72133	-0.0988762	-0.00579973	-0.00262851	-0.0425816	0.72	-108
		0.72133	-104	0.72133	-31	0.72133	-81		0.72267	-0.0922211	-0.00579973	-0.0024338	-0.0399438	0.72133	-113
		0.72267	-97	0.72267	-31	0.72267	-75		0.724	-0.0836645	-0.00804478	-0.00240135	-0.0354218	0.72267	-106
		0.724	-88	0.724	-43	0.724	-74		0.72533	-0.081763	-0.00860605	-0.0021093	-0.0384365	0.724	-94
		0.72533	-86	0.72533	-46	0.72533	-65		0.72667	-0.0912704	-0.00841896	-0.00246625	-0.0388133	0.72533	-102
		0.72667	-96	0.72667	-45	0.72667	-76		0.728	-0.0931718	-0.00841896	-0.00275831	-0.0403206	0.72667	-103
		0.728	-98	0.728	-45	0.728	-85		0.72933	-0.0941226	-0.0101027	-0.00292056	-0.0440889	0.728	-107
		0.72933	-99	0.72933	-54	0.72933	-90		0.73067	-0.100778	-0.00879313	-0.00285566	-0.0463499	0.72933	-117
		0.73067	-106	0.73067	-47	0.73067	-88		0.732	-0.0827138	-0.00785769	-0.00295302	-0.0418279	0.73067	-123
		0.732	-87	0.732	-42	0.732	-91		0.73333	-0.0912704	-0.00710934	-0.00295302	-0.0414511	0.732	-111
		0.73333	-96	0.73333	-38	0.73333	-91		0.73467	-0.110285	-0.00636099	-0.00282321	-0.0455962	0.73333	-110
		0.73467	-116	0.73467	-34	0.73467	-87		0.736	-0.101728	-0.00823187	-0.00253116	-0.0380596	0.73467	-121
		0.736	-107	0.736	-44	0.736	-78		0.73733	-0.0988762	-0.00841896	-0.00298547	-0.0380596	0.736	-101
		0.73733	-104	0.73733	-45	0.73733	-92		0.73867	-0.099827	-0.00692225	-0.00318017	-0.0414511	0.73733	-101
		0.73867	-105	0.73867	-37	0.73867	-98		0.74	-0.102679	-0.0093544	-0.00288811	-0.0448425	0.73867	-110
		0.74	-108	0.74	-50	0.74	-89		0.74133	-0.102679	-0.00823187	-0.0023689	-0.0440889	0.74	-119
		0.74133	-108	0.74133	-44	0.74133	-73		0.74267	-0.0988762	-0.00767061	-0.0022391	-0.0406974	0.74133	-117
		0.74267	-104	0.74267	-41	0.74267	-69		0.744	-0.101728	-0.00898022	-0.00227155	-0.0388133	0.74267	-108
		0.744	-107	0.744	-48	0.744	-70		0.74533	-0.110285	-0.00598681	-0.00240135	-0.0414511	0.744	-103
		0.74533	-116	0.74533	-32	0.74533	-74		0.74667	-0.108384	-0.00898022	-0.00269341	-0.0418279	0.74533	-110
		0.74667	-114	0.74667	-48	0.74667	-83		0.748	-0.0979255	-0.010664	-0.00295302	-0.0418279	0.74667	-111
		0.748	-103	0.748	-57	0.748	-91		0.74933	-0.0884182	-0.00710934	-0.00311527	-0.0418279	0.748	-111
		0.74933	-93	0.74933	-38	0.74933	-96		0.75067	-0.0865167	-0.00561264	-0.00318017	-0.0429584	0.74933	-111
		0.75067	-91	0.75067	-30	0.75067	-98		0.752	-0.10363	-0.00636099	-0.00298547	-0.0399438	0.75067	-114
		0.752	-109	0.752	-34	0.752	-92		0.75333	-0.111236	-0.00692225	-0.00301792	-0.037306	0.752	-106
		0.75333	-117	0.75333	-37	0.75333	-93		0.75467	-0.112186	-0.00542555	-0.00301792	-0.0365523	0.75333	-99
		0.75467	-118	0.75467	-29	0.75467	-93		0.756	-0.106482	-0.00523846	-0.00266096	-0.0391901	0.75467	-97
		0.756	-112	0.756	-28	0.756	-82		0.75733	-0.100778	-0.00654808	-0.00272586	-0.0410743	0.756	-104
		0.75733	-106	0.75733	-35	0.75733	-84		0.75867	-0.106482	-0.00785769	-0.00256361	-0.0414511	0.75733	-109
		0.75867	-112	0.75867	-42	0.75867	-79		0.76	-0.112186	-0.00823187	-0.0024338	-0.0403206	0.75867	-110
		0.76	-118	0.76	-44	0.76	-75		0.76133	-0.112186	-0.00710934	-0.00272586	-0.0388133	0.76	-107
		0.76133	-118	0.76133	-38	0.76133	-84		0.76267	-0.101728	-0.00748352	-0.00266096	-0.0391901	0.76133	-103
		0.76267	-107	0.76267	-40	0.76267	-82		0.764	-0.101728	-0.00879313	-0.00292056	-0.0410743	0.76267	-104
		0.764	-107	0.764	-47	0.764	-90		0.76533	-0.104581	-0.0101027	-0.00314772	-0.0429584	0.764	-109
		0.76533	-110	0.76533	-54	0.76533	-97		0.76667	-0.101728	-0.0102898	-0.00272586	-0.0418279	0.76533	-114
		0.76667	-107	0.76667	-55	0.76667	-84		0.768	-0.107433	-0.0104769	-0.00259606	-0.0399438	0.76667	-111
		0.768	-113	0.768	-56	0.768	-80		0.76933	-0.110285	-0.0102898	-0.0024338	-0.0380596	0.768	-106
		0.76933	-116	0.76933	-55	0.76933	-75		0.77067	-0.109334	-0.00898022	-0.00227155	-0.037306	0.76933	-101
		0.77067	-115	0.77067	-48	0.77067	-70		0.772	-0.10363	-0.00954148	-0.00249871	-0.037306	0.77067	-99
		0.772	-109	0.772	-51	0.772	-77		0.77333	-0.107433	-0.00954148	-0.00279076	-0.0395669	0.772	-99
		0.77333	-113	0.77333	-51	0.77333	-86		0.77467	-0.108384	-0.00916731	-0.00279076	-0.0418279	0.77333	-105
		0.77467	-114	0.77467	-49	0.77467	-86		0.776	-0.109334	-0.010664	-0.00269341	-0.0429584	0.77467	-111
		0.776	-115	0.776	-57	0.776	-83		0.77733	-0.118842	-0.0110382	-0.00343978	-0.0410743	0.776	-114
		0.77733	-125	0.77733	-59	0.77733	-106		0.77867	-0.120743	-0.010664	-0.00360203	-0.0395669	0.77733	-109
		0.77867	-127	0.77867	-57	0.77867	-111		0.78	-0.115989	-0.00954148	-0.00350468	-0.0391901	0.77867	-105
		0.78	-122	0.78	-51	0.78	-108		0.78133	-0.107433	-0.00710934	-0.00327752	-0.0406974	0.78	-104
		0.78133	-113	0.78133	-38	0.78133	-101		0.78267	-0.104581	-0.00654808	-0.00330997	-0.0399438	0.78133	-108
		0.78267	-110	0.78267	-35	0.78267	-102		0.784	-0.106482	-0.00710934	-0.00321262	-0.0384365	0.78267	-106
		0.784	-112	0.784	-38	0.784	-99		0.78533	-0.114088	-0.00804478	-0.00314772	-0.0376828	0.784	-102
		0.78533	-120	0.78533	-43	0.78533	-97		0.78667	-0.127398	-0.00860605	-0.00324507	-0.037306	0.78533	-100
		0.78667	-134	0.78667	-46	0.78667	-100		0.788	-0.121694	-0.0093544	-0.00295302	-0.0406974	0.78667	-99
		0.788	-128	0.788	-50	0.788	-91		0.78933	-0.11694	-0.00972857	-0.00288811	-0.0425816	0.788	-108
		0.78933	-123	0.78933	-52	0.78933	-89		0.79067	-0.118842	-0.00898022	-0.00298547	-0.0429584	0.78933	-113
		0.79067	-125	0.79067	-48	0.79067	-92		0.792	-0.1293	-0.00860605	-0.00301792	-0.0425816	0.79067	-114
		0.792	-136	0.792	-46	0.792	-93		0.79333	-0.122645	-0.00823187	-0.00275831	-0.0380596	0.792	-113
		0.79333	-129	0.79333	-44	0.79333	-85		0.79467	-0.119792	-0.00767061	-0.00279076	-0.0361755	0.79333	-101
		0.79467	-126	0.79467	-41	0.79467	-86		0.796	-0.11694	-0.00598681	-0.00311527	-0.037306	0.79467	-96
		0.796	-123	0.796	-32	0.796	-96		0.79733	-0.108384	-0.00729643	-0.00360203	-0.0422047	0.796	-99
		0.79733	-114	0.79733	-39	0.79733	-111		0.79867	-0.113137	-0.00823187	-0.00288811	-0.0418279	0.79733	-112
		0.79867	-119	0.79867	-44	0.79867	-89		0.8	-0.115039	-0.00879313	-0.00253116	-0.0422047	0.79867	-111
		0.8	-121	0.8	-47	0.8	-78		0.80133	-0.114088	-0.0101027	-0.00253116	-0.0437121	0.8	-112
		0.80133	-120	0.80133	-54	0.80133	-78		0.80267	-0.113137	-0.0102898	-0.00259606	-0.0437121	0.80133	-116
		0.80267	-119	0.80267	-55	0.80267	-80		0.804	-0.123595	-0.0093544	-0.00298547	-0.0425816	0.80267	-116
		0.804	-130	0.804	-50	0.804	-92		0.80533	-0.121694	-0.00879313	-0.00321262	-0.0422047	0.804	-113
		0.80533	-128	0.80533	-47	0.80533	-99		0.80667	-0.111236	-0.0114124	-0.00318017	-0.0437121	0.80533	-112
		0.80667	-117	0.80667	-61	0.80667	-98		0.808	-0.0979255	-0.0117865	-0.00266096	-0.048234	0.80667	-116
		0.808	-103	0.808	-63	0.808	-82		0.80933	-0.112186	-0.0112253	-0.00292056	-0.048234	0.808	-128
		0.80933	-118	0.80933	-60	0.80933	-90		0.81067	-0.119792	-0.010664	-0.00321262	-0.045973	0.80933	-128
		0.81067	-126	0.81067	-57	0.81067	-99		0.812	-0.121694	-0.0114124	-0.00327752	-0.0437121	0.81067	-122
		0.812	-128	0.812	-61	0.812	-101		0.81333	-0.125497	-0.0112253	-0.00314772	-0.0467267	0.812	-116
		0.81333	-132	0.81333	-60	0.81333	-97		0.81467	-0.123595	-0.0108511	-0.00275831	-0.0452194	0.81333	-124
		0.81467	-130	0.81467	-58	0.81467	-85		0.816	-0.11694	-0.010664	-0.00256361	-0.0429584	0.81467	-120
		0.816	-123	0.816	-57	0.816	-79		0.81733	-0.111236	-0.0104769	-0.00269341	-0.0429584	0.816	-114
		0.81733	-117	0.81733	-56	0.81733	-83		0.81867	-0.127398	-0.0102898	-0.00262851	-0.0433352	0.81733	-114
		0.81867	-134	0.81867	-55	0.81867	-81		0.82	-0.131201	-0.0104769	-0.00295302	-0.0440889	0.81867	-115
		0.82	-138	0.82	-56	0.82	-91		0.82133	-0.13025	-0.0115995	-0.00330997	-0.0444657	0.82	-117
		0.82133	-137	0.82133	-62	0.82133	-102		0.82267	-0.127398	-0.00954148	-0.00343978	-0.0440889	0.82133	-118
		0.82267	-134	0.82267	-51	0.82267	-106		0.824	-0.120743	-0.00879313	-0.00305037	-0.0429584	0.82267	-117
		0.824	-127	0.824	-47	0.824	-94		0.82533	-0.123595	-0.00860605	-0.00288811	-0.0455962	0.824	-114
		0.82533	-130	0.82533	-46	0.82533	-89		0.82667	-0.125497	-0.00841896	-0.00292056	-0.0497413	0.82533	-121
		0.82667	-132	0.82667	-45	0.82667	-90		0.828	-0.120743	-0.00785769	-0.00301792	-0.050495	0.82667	-132
		0.828	-127	0.828	-42	0.828	-93		0.82933	-0.125497	-0.00898022	-0.00279076	-0.0523791	0.828	-134
		0.82933	-132	0.82933	-48	0.82933	-86		0.83067	-0.133103	-0.010664	-0.00269341	-0.0535096	0.82933	-139
		0.83067	-140	0.83067	-57	0.83067	-83		0.832	-0.136906	-0.0125349	-0.00275831	-0.0527559	0.83067	-142
		0.832	-144	0.832	-67	0.832	-85		0.83333	-0.134053	-0.0114124	-0.00305037	-0.048234	0.832	-140
		0.83333	-141	0.83333	-61	0.83333	-94		0.83467	-0.119792	-0.00972857	-0.00311527	-0.0452194	0.83333	-128
		0.83467	-126	0.83467	-52	0.83467	-96		0.836	-0.118842	-0.00898022	-0.00318017	-0.0444657	0.83467	-120
		0.836	-125	0.836	-48	0.836	-98		0.83733	-0.121694	-0.0112253	-0.00314772	-0.0444657	0.836	-118
		0.83733	-128	0.83733	-60	0.83733	-97		0.83867	-0.120743	-0.0117865	-0.00295302	-0.0452194	0.83733	-118
		0.83867	-127	0.83867	-63	0.83867	-91		0.84	-0.1293	-0.0119736	-0.00282321	-0.0493645	0.83867	-120
		0.84	-136	0.84	-64	0.84	-87		0.84133	-0.131201	-0.0123478	-0.00295302	-0.0512486	0.84	-131
		0.84133	-138	0.84133	-66	0.84133	-91		0.84267	-0.128349	-0.012722	-0.00321262	-0.050495	0.84133	-136
		0.84267	-135	0.84267	-68	0.84267	-99		0.844	-0.1293	-0.0134703	-0.00314772	-0.0512486	0.84267	-134
		0.844	-136	0.844	-72	0.844	-97		0.84533	-0.125497	-0.0129091	-0.00295302	-0.0516254	0.844	-136
		0.84533	-132	0.84533	-69	0.84533	-91		0.84667	-0.123595	-0.0112253	-0.00295302	-0.0512486	0.84533	-137
		0.84667	-130	0.84667	-60	0.84667	-91		0.848	-0.123595	-0.0104769	-0.00311527	-0.0493645	0.84667	-136
		0.848	-130	0.848	-56	0.848	-96		0.84933	-0.128349	-0.00898022	-0.00314772	-0.0523791	0.848	-131
		0.84933	-135	0.84933	-48	0.84933	-97		0.85067	-0.119792	-0.00898022	-0.00311527	-0.0523791	0.84933	-139
		0.85067	-126	0.85067	-48	0.85067	-96		0.852	-0.11694	-0.010664	-0.00301792	-0.0508718	0.85067	-139
		0.852	-123	0.852	-57	0.852	-93		0.85333	-0.119792	-0.0101027	-0.00285566	-0.0497413	0.852	-135
		0.85333	-126	0.85333	-54	0.85333	-88		0.85467	-0.114088	-0.0117865	-0.00298547	-0.0535096	0.85333	-132
		0.85467	-120	0.85467	-63	0.85467	-92		0.856	-0.113137	-0.0130962	-0.00324507	-0.050495	0.85467	-142
		0.856	-119	0.856	-70	0.856	-100		0.85733	-0.118842	-0.0119736	-0.00334242	-0.0448425	0.856	-134
		0.85733	-125	0.85733	-64	0.85733	-103		0.85867	-0.128349	-0.0102898	-0.00311527	-0.0422047	0.85733	-119
		0.85867	-135	0.85867	-55	0.85867	-96		0.86	-0.128349	-0.010664	-0.00259606	-0.0444657	0.85867	-112
		0.86	-135	0.86	-57	0.86	-80		0.86133	-0.128349	-0.0115995	-0.00256361	-0.0463499	0.86	-118
		0.86133	-135	0.86133	-62	0.86133	-79		0.86267	-0.125497	-0.0125349	-0.00295302	-0.0501181	0.86133	-123
		0.86267	-132	0.86267	-67	0.86267	-91		0.864	-0.119792	-0.0125349	-0.00356958	-0.059162	0.86267	-133
		0.864	-126	0.864	-67	0.864	-110		0.86533	-0.124546	-0.0115995	-0.00337487	-0.056901	0.864	-157
		0.86533	-131	0.86533	-62	0.86533	-104		0.86667	-0.118842	-0.010664	-0.00337487	-0.0538864	0.86533	-151
		0.86667	-125	0.86667	-57	0.86667	-104		0.868	-0.115989	-0.0115995	-0.00340733	-0.0527559	0.86667	-143
		0.868	-122	0.868	-62	0.868	-105		0.86933	-0.126447	-0.0115995	-0.00327752	-0.0546401	0.868	-140
		0.86933	-133	0.86933	-62	0.86933	-101		0.87067	-0.117891	-0.0108511	-0.00324507	-0.0553937	0.86933	-145
		0.87067	-124	0.87067	-58	0.87067	-100		0.872	-0.120743	-0.0102898	-0.00292056	-0.0535096	0.87067	-147
		0.872	-127	0.872	-55	0.872	-90		0.87333	-0.127398	-0.0112253	-0.00259606	-0.0516254	0.872	-142
		0.87333	-134	0.87333	-60	0.87333	-80		0.87467	-0.124546	-0.010664	-0.00279076	-0.0580315	0.87333	-137
		0.87467	-131	0.87467	-57	0.87467	-86		0.876	-0.122645	-0.00991566	-0.00272586	-0.0572779	0.87467	-154
		0.876	-129	0.876	-53	0.876	-84		0.87733	-0.114088	-0.00972857	-0.00279076	-0.0550169	0.876	-152
		0.87733	-120	0.87733	-52	0.87733	-86		0.87867	-0.104581	-0.0110382	-0.00292056	-0.0538864	0.87733	-146
		0.87867	-110	0.87867	-59	0.87867	-90		0.88	-0.100778	-0.00954148	-0.00301792	-0.0595388	0.87867	-143
		0.88	-106	0.88	-51	0.88	-93		0.88133	-0.110285	-0.00954148	-0.00288811	-0.0595388	0.88	-158
		0.88133	-116	0.88133	-51	0.88133	-89		0.88267	-0.11694	-0.0110382	-0.00285566	-0.0580315	0.88133	-158
		0.88267	-123	0.88267	-59	0.88267	-88		0.884	-0.121694	-0.010664	-0.00298547	-0.0576547	0.88267	-154
		0.884	-128	0.884	-57	0.884	-92		0.88533	-0.123595	-0.0115995	-0.00308282	-0.0546401	0.884	-153
		0.88533	-130	0.88533	-62	0.88533	-95		0.88667	-0.126447	-0.0121607	-0.00321262	-0.0546401	0.88533	-145
		0.88667	-133	0.88667	-65	0.88667	-99		0.888	-0.123595	-0.0115995	-0.00324507	-0.0546401	0.88667	-145
		0.888	-130	0.888	-62	0.888	-100		0.88933	-0.115989	-0.00916731	-0.00327752	-0.0535096	0.888	-145
		0.88933	-122	0.88933	-49	0.88933	-101		0.89067	-0.115989	-0.00860605	-0.00334242	-0.0527559	0.88933	-142
		0.89067	-122	0.89067	-46	0.89067	-103		0.892	-0.124546	-0.00860605	-0.00340733	-0.0531328	0.89067	-140
		0.892	-131	0.892	-46	0.892	-105		0.89333	-0.132152	-0.00823187	-0.00340733	-0.0508718	0.892	-141
		0.89333	-139	0.89333	-44	0.89333	-105		0.89467	-0.134053	-0.00879313	-0.00334242	-0.0399438	0.89333	-135
		0.89467	-141	0.89467	-47	0.89467	-103		0.896	-0.131201	-0.00991566	-0.00324507	-0.0463499	0.89467	-106
		0.896	-138	0.896	-53	0.896	-100		0.89733	-0.13025	-0.010664	-0.00337487	-0.0493645	0.896	-123
		0.89733	-137	0.89733	-57	0.89733	-104		0.89867	-0.133103	-0.0102898	-0.00343978	-0.0489877	0.89733	-131
		0.89867	-140	0.89867	-55	0.89867	-106		0.9	-0.136906	-0.0102898	-0.00321262	-0.0493645	0.89867	-130
		0.9	-144	0.9	-55	0.9	-99		0.90133	-0.135004	-0.0123478	-0.00330997	-0.0565242	0.9	-131
		0.90133	-142	0.90133	-66	0.90133	-102		0.90267	-0.132152	-0.0138445	-0.00347223	-0.0584084	0.90133	-150
		0.90267	-139	0.90267	-74	0.90267	-107		0.904	-0.1293	-0.0115995	-0.00350468	-0.0572779	0.90267	-155
		0.904	-136	0.904	-62	0.904	-108		0.90533	-0.125497	-0.0123478	-0.00318017	-0.056901	0.904	-152
		0.90533	-132	0.90533	-66	0.90533	-98		0.90667	-0.127398	-0.0115995	-0.00343978	-0.0572779	0.90533	-151
		0.90667	-134	0.90667	-62	0.90667	-106		0.908	-0.131201	-0.00991566	-0.00373183	-0.0550169	0.90667	-152
		0.908	-138	0.908	-53	0.908	-115		0.90933	-0.1293	-0.0093544	-0.00392654	-0.050495	0.908	-146
		0.90933	-136	0.90933	-50	0.90933	-121		0.91067	-0.113137	-0.0101027	-0.00382918	-0.0508718	0.90933	-134
		0.91067	-119	0.91067	-54	0.91067	-118		0.912	-0.118842	-0.0108511	-0.00334242	-0.050495	0.91067	-135
		0.912	-125	0.912	-58	0.912	-103		0.91333	-0.117891	-0.0119736	-0.00301792	-0.0508718	0.912	-134
		0.91333	-124	0.91333	-64	0.91333	-93		0.91467	-0.114088	-0.0145929	-0.00288811	-0.0527559	0.91333	-135
		0.91467	-120	0.91467	-78	0.91467	-89		0.916	-0.122645	-0.0138445	-0.00318017	-0.0531328	0.91467	-140
		0.916	-129	0.916	-74	0.916	-98		0.91733	-0.127398	-0.0129091	-0.00347223	-0.0531328	0.916	-141
		0.91733	-134	0.91733	-69	0.91733	-107		0.91867	-0.13025	-0.0125349	-0.00356958	-0.0546401	0.91733	-141
		0.91867	-137	0.91867	-67	0.91867	-110		0.92	-0.133103	-0.0121607	-0.00356958	-0.059162	0.91867	-145
		0.92	-140	0.92	-65	0.92	-110		0.92133	-0.133103	-0.0119736	-0.00360203	-0.0629303	0.92	-157
		0.92133	-140	0.92133	-64	0.92133	-111		0.92267	-0.127398	-0.0119736	-0.00337487	-0.0633071	0.92133	-167
		0.92267	-134	0.92267	-64	0.92267	-104		0.924	-0.123595	-0.0119736	-0.00318017	-0.061423	0.92267	-168
		0.924	-130	0.924	-64	0.924	-98		0.92533	-0.120743	-0.012722	-0.00314772	-0.0584084	0.924	-163
		0.92533	-127	0.92533	-68	0.92533	-97		0.92667	-0.110285	-0.0132832	-0.00360203	-0.0553937	0.92533	-155
		0.92667	-116	0.92667	-71	0.92667	-111		0.928	-0.113137	-0.0132832	-0.00386164	-0.0508718	0.92667	-147
		0.928	-119	0.928	-71	0.928	-119		0.92933	-0.120743	-0.0125349	-0.00386164	-0.0474803	0.928	-135
		0.92933	-127	0.92933	-67	0.92933	-119		0.93067	-0.1293	-0.0101027	-0.00363448	-0.0497413	0.92933	-126
		0.93067	-136	0.93067	-54	0.93067	-112		0.932	-0.123595	-0.0108511	-0.00353713	-0.0546401	0.93067	-132
		0.932	-130	0.932	-58	0.932	-109		0.93333	-0.128349	-0.0125349	-0.00347223	-0.0565242	0.932	-145
		0.93333	-135	0.93333	-67	0.93333	-107		0.93467	-0.13025	-0.0132832	-0.00340733	-0.056901	0.93333	-150
		0.93467	-137	0.93467	-71	0.93467	-105		0.936	-0.124546	-0.0130962	-0.00337487	-0.0584084	0.93467	-151
		0.936	-131	0.936	-70	0.936	-104		0.93733	-0.126447	-0.0130962	-0.00340733	-0.0584084	0.936	-155
		0.93733	-133	0.93733	-70	0.93733	-105		0.93867	-0.124546	-0.0132832	-0.00340733	-0.0572779	0.93733	-155
		0.93867	-131	0.93867	-71	0.93867	-105		0.94	-0.123595	-0.0140316	-0.00340733	-0.0565242	0.93867	-152
		0.94	-130	0.94	-75	0.94	-105		0.94133	-0.128349	-0.0142187	-0.00330997	-0.0602925	0.94	-150
		0.94133	-135	0.94133	-76	0.94133	-102		0.94267	-0.1293	-0.0134703	-0.00356958	-0.0557706	0.94133	-160
		0.94267	-136	0.94267	-72	0.94267	-110		0.944	-0.1293	-0.0130962	-0.00373183	-0.056901	0.94267	-148
		0.944	-136	0.944	-70	0.944	-115		0.94533	-0.1293	-0.0142187	-0.00382918	-0.0640608	0.944	-151
		0.94533	-136	0.94533	-76	0.94533	-118		0.94667	-0.13025	-0.0104769	-0.00412124	-0.0633071	0.94533	-170
		0.94667	-137	0.94667	-56	0.94667	-127		0.948	-0.125497	-0.0101027	-0.00405634	-0.0595388	0.94667	-168
		0.948	-132	0.948	-54	0.948	-125		0.94933	-0.126447	-0.0129091	-0.00379673	-0.0561474	0.948	-158
		0.94933	-133	0.94933	-69	0.94933	-117		0.95067	-0.127398	-0.0153412	-0.00347223	-0.0542632	0.94933	-149
		0.95067	-134	0.95067	-82	0.95067	-107		0.952	-0.121694	-0.0125349	-0.00308282	-0.0542632	0.95067	-144
		0.952	-128	0.952	-67	0.952	-95		0.95333	-0.113137	-0.0121607	-0.00337487	-0.0576547	0.952	-144
		0.95333	-119	0.95333	-65	0.95333	-104		0.95467	-0.117891	-0.0144058	-0.00360203	-0.0602925	0.95333	-153
		0.95467	-124	0.95467	-77	0.95467	-111		0.956	-0.128349	-0.0160896	-0.00363448	-0.0602925	0.95467	-160
		0.956	-135	0.956	-86	0.956	-112		0.95733	-0.13025	-0.0166508	-0.00369938	-0.0606693	0.956	-160
		0.95733	-137	0.95733	-89	0.95733	-114		0.95867	-0.131201	-0.0153412	-0.00373183	-0.0617998	0.95733	-161
		0.95867	-138	0.95867	-82	0.95867	-115		0.96	-0.131201	-0.0129091	-0.00369938	-0.0625535	0.95867	-164
		0.96	-138	0.96	-69	0.96	-114		0.96133	-0.131201	-0.012722	-0.00363448	-0.0625535	0.96	-166
		0.96133	-138	0.96133	-68	0.96133	-112		0.96267	-0.13025	-0.012722	-0.00376428	-0.061423	0.96133	-166
		0.96267	-137	0.96267	-68	0.96267	-116		0.964	-0.134053	-0.0134703	-0.00353713	-0.0621766	0.96267	-163
		0.964	-141	0.964	-72	0.964	-109		0.96533	-0.135955	-0.0155283	-0.00347223	-0.0629303	0.964	-165
		0.96533	-143	0.96533	-83	0.96533	-107		0.96667	-0.136906	-0.0140316	-0.00379673	-0.059162	0.96533	-167
		0.96667	-144	0.96667	-75	0.96667	-117		0.968	-0.133103	-0.0142187	-0.00376428	-0.0602925	0.96667	-157
		0.968	-140	0.968	-76	0.968	-116		0.96933	-0.126447	-0.0145929	-0.00386164	-0.0617998	0.968	-160
		0.96933	-133	0.96933	-78	0.96933	-119		0.97067	-0.118842	-0.0132832	-0.00395899	-0.0633071	0.96933	-164
		0.97067	-125	0.97067	-71	0.97067	-122		0.972	-0.114088	-0.0142187	-0.00392654	-0.0629303	0.97067	-168
		0.972	-120	0.972	-76	0.972	-121		0.97333	-0.115039	-0.0151541	-0.00386164	-0.0625535	0.972	-167
		0.97333	-121	0.97333	-81	0.97333	-119		0.97467	-0.119792	-0.0155283	-0.00395899	-0.0629303	0.97333	-166
		0.97467	-126	0.97467	-83	0.97467	-122		0.976	-0.123595	-0.0155283	-0.00418614	-0.0636839	0.97467	-167
		0.976	-130	0.976	-83	0.976	-129		0.97733	-0.124546	-0.0160896	-0.0044133	-0.0625535	0.976	-169
		0.97733	-131	0.97733	-86	0.97733	-136		0.97867	-0.124546	-0.0147799	-0.00428349	-0.0621766	0.97733	-166
		0.97867	-131	0.97867	-79	0.97867	-132		0.98	-0.131201	-0.0130962	-0.00415369	-0.0606693	0.97867	-165
		0.98	-138	0.98	-70	0.98	-128		0.98133	-0.135955	-0.0132832	-0.00405634	-0.0584084	0.98	-161
		0.98133	-143	0.98133	-71	0.98133	-125		0.98267	-0.132152	-0.0160896	-0.00399144	-0.0629303	0.98133	-155
		0.98267	-139	0.98267	-86	0.98267	-123		0.984	-0.119792	-0.0183346	-0.00418614	-0.0663217	0.98267	-167
		0.984	-126	0.984	-98	0.984	-129		0.98533	-0.126447	-0.019083	-0.00415369	-0.0651913	0.984	-176
		0.98533	-133	0.98533	-102	0.98533	-128		0.98667	-0.138807	-0.0155283	-0.00399144	-0.0602925	0.98533	-173
		0.98667	-146	0.98667	-83	0.98667	-123		0.988	-0.132152	-0.0144058	-0.00405634	-0.0636839	0.98667	-160
		0.988	-139	0.988	-77	0.988	-125		0.98933	-0.127398	-0.0138445	-0.00382918	-0.0689595	0.988	-169
		0.98933	-134	0.98933	-74	0.98933	-118		0.99067	-0.120743	-0.0130962	-0.00363448	-0.0715973	0.98933	-183
		0.99067	-127	0.99067	-70	0.99067	-112		0.992	-0.11694	-0.0140316	-0.00360203	-0.0708437	0.99067	-190
		0.992	-123	0.992	-75	0.992	-111		0.99333	-0.127398	-0.0164637	-0.00389409	-0.07009	0.992	-188
		0.99333	-134	0.99333	-88	0.99333	-120		0.99467	-0.132152	-0.0177734	-0.00376428	-0.0704669	0.99333	-186
		0.99467	-139	0.99467	-95	0.99467	-116		0.996	-0.13025	-0.0173992	-0.00382918	-0.0697132	0.99467	-187
		0.996	-137	0.996	-93	0.996	-118		0.99733	-0.125497	-0.0159025	-0.00421859	-0.0666986	0.996	-185
		0.99733	-132	0.99733	-85	0.99733	-130		0.99867	-0.132152	-0.0151541	-0.00425104	-0.07009	0.99733	-177
		0.99867	-139	0.99867	-81	0.99867	-131		1	-0.1293	-0.0145929	-0.00402389	-0.0670754	0.99867	-186
		1	-136	1	-78	1	-124		1.00133	-0.125497	-0.0138445	-0.00382918	-0.0617998	1	-178
		1.00133	-132	1.00133	-74	1.00133	-118		1.00267	-0.124546	-0.0132832	-0.00382918	-0.0587852	1.00133	-164
		1.00267	-131	1.00267	-71	1.00267	-118		1.004	-0.136906	-0.0138445	-0.00386164	-0.0606693	1.00267	-156
		1.004	-144	1.004	-74	1.004	-119		1.00533	-0.132152	-0.0144058	-0.00399144	-0.0640608	1.004	-161
		1.00533	-139	1.00533	-77	1.00533	-123		1.00667	-0.127398	-0.0142187	-0.00415369	-0.0674522	1.00533	-170
		1.00667	-134	1.00667	-76	1.00667	-128		1.008	-0.131201	-0.0153412	-0.00425104	-0.0689595	1.00667	-179
		1.008	-138	1.008	-82	1.008	-131		1.00933	-0.140708	-0.0155283	-0.00421859	-0.0712205	1.008	-183
		1.00933	-148	1.00933	-83	1.00933	-130		1.01067	-0.147364	-0.0142187	-0.00415369	-0.0757424	1.00933	-189
		1.01067	-155	1.01067	-76	1.01067	-128		1.012	-0.146413	-0.0114124	-0.00415369	-0.0787571	1.01067	-201
		1.012	-154	1.012	-61	1.012	-128		1.01333	-0.135955	-0.0125349	-0.00431595	-0.0689595	1.012	-209
		1.01333	-143	1.01333	-67	1.01333	-133		1.01467	-0.132152	-0.0138445	-0.00415369	-0.0704669	1.01333	-183
		1.01467	-139	1.01467	-74	1.01467	-128		1.016	-0.135004	-0.0147799	-0.00408879	-0.0731046	1.01467	-187
		1.016	-142	1.016	-79	1.016	-126		1.01733	-0.135955	-0.0155283	-0.00408879	-0.0734815	1.016	-194
		1.01733	-143	1.01733	-83	1.01733	-126		1.01867	-0.126447	-0.014967	-0.00402389	-0.0674522	1.01733	-195
		1.01867	-133	1.01867	-80	1.01867	-124		1.02	-0.128349	-0.0140316	-0.00395899	-0.0659449	1.01867	-179
		1.02	-135	1.02	-75	1.02	-122		1.02133	-0.135004	-0.0129091	-0.00399144	-0.0666986	1.02	-175
		1.02133	-142	1.02133	-69	1.02133	-123		1.02267	-0.137856	-0.0130962	-0.00415369	-0.0678291	1.02133	-177
		1.02267	-145	1.02267	-70	1.02267	-128		1.024	-0.133103	-0.0138445	-0.00464045	-0.0689595	1.02267	-180
		1.024	-140	1.024	-74	1.024	-143		1.02533	-0.135955	-0.0132832	-0.0043484	-0.0689595	1.024	-183
		1.02533	-143	1.02533	-71	1.02533	-134		1.02667	-0.143561	-0.0114124	-0.00421859	-0.0693364	1.02533	-183
		1.02667	-151	1.02667	-61	1.02667	-130		1.028	-0.148314	-0.0104769	-0.00421859	-0.0712205	1.02667	-184
		1.028	-156	1.028	-56	1.028	-130		1.02933	-0.135955	-0.0123478	-0.00392654	-0.0727278	1.028	-189
		1.02933	-143	1.02933	-66	1.02933	-121		1.03067	-0.1293	-0.0130962	-0.00402389	-0.0734815	1.02933	-193
		1.03067	-136	1.03067	-70	1.03067	-124		1.032	-0.124546	-0.0121607	-0.00402389	-0.0749888	1.03067	-195
		1.032	-131	1.032	-65	1.032	-124		1.03333	-0.121694	-0.0134703	-0.00369938	-0.0768729	1.032	-199
		1.03333	-128	1.03333	-72	1.03333	-114		1.03467	-0.119792	-0.0140316	-0.00321262	-0.0749888	1.03333	-204
		1.03467	-126	1.03467	-75	1.03467	-99		1.036	-0.132152	-0.0138445	-0.00340733	-0.0731046	1.03467	-199
		1.036	-139	1.036	-74	1.036	-105		1.03733	-0.146413	-0.0136574	-0.00363448	-0.0719742	1.036	-194
		1.03733	-154	1.03733	-73	1.03733	-112		1.03867	-0.154969	-0.0155283	-0.00347223	-0.0742351	1.03733	-191
		1.03867	-163	1.03867	-83	1.03867	-107		1.04	-0.144511	-0.0164637	-0.00408879	-0.0738583	1.03867	-197
		1.04	-152	1.04	-88	1.04	-126		1.04133	-0.140708	-0.017025	-0.00428349	-0.0742351	1.04	-196
		1.04133	-148	1.04133	-91	1.04133	-132		1.04267	-0.137856	-0.0173992	-0.00421859	-0.0749888	1.04133	-197
		1.04267	-145	1.04267	-93	1.04267	-130		1.044	-0.131201	-0.0162767	-0.00395899	-0.0731046	1.04267	-199
		1.044	-138	1.044	-87	1.044	-122		1.04533	-0.145462	-0.0153412	-0.00386164	-0.074612	1.044	-194
		1.04533	-153	1.04533	-82	1.04533	-119		1.04667	-0.145462	-0.0147799	-0.00395899	-0.0761193	1.04533	-198
		1.04667	-153	1.04667	-79	1.04667	-122		1.048	-0.138807	-0.0157154	-0.00405634	-0.0768729	1.04667	-202
		1.048	-146	1.048	-84	1.048	-125		1.04933	-0.133103	-0.0142187	-0.00386164	-0.0783802	1.048	-204
		1.04933	-140	1.04933	-76	1.04933	-119		1.05067	-0.132152	-0.0142187	-0.00379673	-0.0768729	1.04933	-208
		1.05067	-139	1.05067	-76	1.05067	-117		1.052	-0.136906	-0.0153412	-0.00395899	-0.0764961	1.05067	-204
		1.052	-144	1.052	-82	1.052	-122		1.05333	-0.138807	-0.0160896	-0.00431595	-0.0772498	1.052	-203
		1.05333	-146	1.05333	-86	1.05333	-133		1.05467	-0.1293	-0.0144058	-0.00470535	-0.0753656	1.05333	-205
		1.05467	-136	1.05467	-77	1.05467	-145		1.056	-0.133103	-0.0142187	-0.0043484	-0.0749888	1.05467	-200
		1.056	-140	1.056	-76	1.056	-134		1.05733	-0.138807	-0.0151541	-0.00431595	-0.0772498	1.056	-199
		1.05733	-146	1.05733	-81	1.05733	-133		1.05867	-0.141659	-0.0144058	-0.004608	-0.0813949	1.05733	-205
		1.05867	-149	1.05867	-77	1.05867	-142		1.06	-0.132152	-0.0130962	-0.00477026	-0.0791339	1.05867	-216
		1.06	-139	1.06	-70	1.06	-147		1.06133	-0.136906	-0.0117865	-0.0046729	-0.0749888	1.06	-210
		1.06133	-144	1.06133	-63	1.06133	-144		1.06267	-0.132152	-0.0108511	-0.0045431	-0.0738583	1.06133	-199
		1.06267	-139	1.06267	-58	1.06267	-140		1.064	-0.119792	-0.0138445	-0.0045431	-0.0780034	1.06267	-196
		1.064	-126	1.064	-74	1.064	-140		1.06533	-0.114088	-0.0138445	-0.00457555	-0.0798876	1.064	-207
		1.06533	-120	1.06533	-74	1.06533	-141		1.06667	-0.128349	-0.0140316	-0.00431595	-0.081018	1.06533	-212
		1.06667	-135	1.06667	-75	1.06667	-133		1.068	-0.132152	-0.0155283	-0.00408879	-0.0798876	1.06667	-215
		1.068	-139	1.068	-83	1.068	-126		1.06933	-0.120743	-0.0151541	-0.00405634	-0.0749888	1.068	-212
		1.06933	-127	1.06933	-81	1.06933	-125		1.07067	-0.113137	-0.0164637	-0.00386164	-0.0708437	1.06933	-199
		1.07067	-119	1.07067	-88	1.07067	-119		1.072	-0.121694	-0.017025	-0.00392654	-0.0738583	1.07067	-188
		1.072	-128	1.072	-91	1.072	-121		1.07333	-0.1293	-0.0151541	-0.00392654	-0.0783802	1.072	-196
		1.07333	-136	1.07333	-81	1.07333	-121		1.07467	-0.132152	-0.0132832	-0.00376428	-0.0787571	1.07333	-208
		1.07467	-139	1.07467	-71	1.07467	-116		1.076	-0.141659	-0.0142187	-0.00389409	-0.0802644	1.07467	-209
		1.076	-149	1.076	-76	1.076	-120		1.07733	-0.14261	-0.0157154	-0.00431595	-0.0806412	1.076	-213
		1.07733	-150	1.07733	-84	1.07733	-133		1.07867	-0.138807	-0.0164637	-0.00457555	-0.0795107	1.07733	-214
		1.07867	-146	1.07867	-88	1.07867	-141		1.08	-0.13025	-0.0147799	-0.00438085	-0.0753656	1.07867	-211
		1.08	-137	1.08	-79	1.08	-135		1.08133	-0.126447	-0.0147799	-0.00408879	-0.0787571	1.08	-200
		1.08133	-133	1.08133	-79	1.08133	-126		1.08267	-0.134053	-0.014967	-0.00408879	-0.081018	1.08133	-209
		1.08267	-141	1.08267	-80	1.08267	-126		1.084	-0.144511	-0.0140316	-0.00418614	-0.0817717	1.08267	-215
		1.084	-152	1.084	-75	1.084	-129		1.08533	-0.151167	-0.0164637	-0.00421859	-0.0802644	1.084	-217
		1.08533	-159	1.08533	-88	1.08533	-130		1.08667	-0.144511	-0.0177734	-0.00425104	-0.0783802	1.08533	-213
		1.08667	-152	1.08667	-95	1.08667	-131		1.088	-0.143561	-0.0179604	-0.00415369	-0.0802644	1.08667	-208
		1.088	-151	1.088	-96	1.088	-128		1.08933	-0.143561	-0.0179604	-0.00408879	-0.0847863	1.088	-213
		1.08933	-151	1.08933	-96	1.08933	-126		1.09067	-0.135955	-0.0179604	-0.0043484	-0.0829022	1.08933	-225
		1.09067	-143	1.09067	-96	1.09067	-134		1.092	-0.139758	-0.0194571	-0.0043484	-0.0802644	1.09067	-220
		1.092	-147	1.092	-104	1.092	-134		1.09333	-0.132152	-0.0205797	-0.00425104	-0.0802644	1.092	-213
		1.09333	-139	1.09333	-110	1.09333	-131		1.09467	-0.125497	-0.0172121	-0.00418614	-0.0836558	1.09333	-213
		1.09467	-132	1.09467	-92	1.09467	-129		1.096	-0.144511	-0.0175863	-0.00480271	-0.0851631	1.09467	-222
		1.096	-152	1.096	-94	1.096	-148		1.09733	-0.132152	-0.0168379	-0.0046729	-0.0851631	1.096	-226
		1.09733	-139	1.09733	-90	1.09733	-144		1.09867	-0.125497	-0.0147799	-0.00444575	-0.083279	1.09733	-226
		1.09867	-132	1.09867	-79	1.09867	-137		1.1	-0.13025	-0.0157154	-0.00425104	-0.0802644	1.09867	-221
		1.1	-137	1.1	-84	1.1	-131		1.10133	-0.147364	-0.0160896	-0.00392654	-0.0836558	1.1	-213
		1.10133	-155	1.10133	-86	1.10133	-121		1.10267	-0.143561	-0.0157154	-0.00386164	-0.0829022	1.10133	-222
		1.10267	-151	1.10267	-84	1.10267	-119		1.104	-0.141659	-0.0151541	-0.00392654	-0.0806412	1.10267	-220
		1.104	-149	1.104	-81	1.104	-121		1.10533	-0.145462	-0.0157154	-0.00415369	-0.0798876	1.104	-214
		1.10533	-153	1.10533	-84	1.10533	-128		1.10667	-0.143561	-0.0164637	-0.0043484	-0.0840327	1.10533	-212
		1.10667	-151	1.10667	-88	1.10667	-134		1.108	-0.148314	-0.0166508	-0.00421859	-0.0870473	1.10667	-223
		1.108	-156	1.108	-89	1.108	-130		1.10933	-0.154019	-0.0166508	-0.00402389	-0.0866705	1.108	-231
		1.10933	-162	1.10933	-89	1.10933	-124		1.11067	-0.15592	-0.0164637	-0.00386164	-0.081018	1.10933	-230
		1.11067	-164	1.11067	-88	1.11067	-119		1.112	-0.153068	-0.0164637	-0.00395899	-0.081018	1.11067	-215
		1.112	-161	1.112	-88	1.112	-122		1.11333	-0.150216	-0.0173992	-0.00421859	-0.0844095	1.112	-215
		1.11333	-158	1.11333	-93	1.11333	-130		1.11467	-0.144511	-0.0192701	-0.00438085	-0.0874241	1.11333	-224
		1.11467	-152	1.11467	-103	1.11467	-135		1.116	-0.135004	-0.0177734	-0.00421859	-0.0851631	1.11467	-232
		1.116	-142	1.116	-95	1.116	-130		1.11733	-0.131201	-0.0179604	-0.00428349	-0.0851631	1.116	-226
		1.11733	-138	1.11733	-96	1.11733	-132		1.11867	-0.1293	-0.0188959	-0.00421859	-0.0840327	1.11733	-226
		1.11867	-136	1.11867	-101	1.11867	-130		1.12	-0.13025	-0.0202055	-0.00399144	-0.0817717	1.11867	-223
		1.12	-137	1.12	-108	1.12	-123		1.12133	-0.135955	-0.0203926	-0.00353713	-0.081018	1.12	-217
		1.12133	-143	1.12133	-109	1.12133	-109		1.12267	-0.141659	-0.0198313	-0.00408879	-0.0829022	1.12133	-215
		1.12267	-149	1.12267	-106	1.12267	-126		1.124	-0.148314	-0.0187088	-0.00444575	-0.0836558	1.12267	-220
		1.124	-156	1.124	-100	1.124	-137		1.12533	-0.154019	-0.0173992	-0.0044782	-0.0829022	1.124	-222
		1.12533	-162	1.12533	-93	1.12533	-138		1.12667	-0.154969	-0.0181475	-0.00421859	-0.08554	1.12533	-220
		1.12667	-163	1.12667	-97	1.12667	-130		1.128	-0.148314	-0.0177734	-0.00405634	-0.081018	1.12667	-227
		1.128	-156	1.128	-95	1.128	-125		1.12933	-0.141659	-0.0166508	-0.00425104	-0.0791339	1.128	-215
		1.12933	-149	1.12933	-89	1.12933	-131		1.13067	-0.137856	-0.017025	-0.004608	-0.083279	1.12933	-210
		1.13067	-145	1.13067	-91	1.13067	-142		1.132	-0.14261	-0.0172121	-0.0045431	-0.0847863	1.13067	-221
		1.132	-150	1.132	-92	1.132	-140		1.13333	-0.138807	-0.0185217	-0.00451065	-0.0844095	1.132	-225
		1.13333	-146	1.13333	-99	1.13333	-139		1.13467	-0.137856	-0.0205797	-0.00431595	-0.0851631	1.13333	-224
		1.13467	-145	1.13467	-110	1.13467	-133		1.136	-0.138807	-0.021328	-0.00399144	-0.0885546	1.13467	-226
		1.136	-146	1.136	-114	1.136	-123		1.13733	-0.132152	-0.021328	-0.00405634	-0.0889314	1.136	-235
		1.13733	-139	1.13733	-114	1.13733	-125		1.13867	-0.145462	-0.0209538	-0.0044133	-0.0896851	1.13733	-236
		1.13867	-153	1.13867	-112	1.13867	-136		1.14	-0.151167	-0.0202055	-0.004608	-0.0904387	1.13867	-238
		1.14	-159	1.14	-108	1.14	-142		1.14133	-0.147364	-0.0205797	-0.00444575	-0.0900619	1.14	-240
		1.14133	-155	1.14133	-110	1.14133	-137		1.14267	-0.150216	-0.0222635	-0.00405634	-0.0859168	1.14133	-239
		1.14267	-158	1.14267	-119	1.14267	-125		1.144	-0.153068	-0.0220764	-0.00415369	-0.0851631	1.14267	-228
		1.144	-161	1.144	-118	1.144	-128		1.14533	-0.15592	-0.0185217	-0.00425104	-0.08554	1.144	-226
		1.14533	-164	1.14533	-99	1.14533	-131		1.14667	-0.15592	-0.0188959	-0.00415369	-0.0847863	1.14533	-227
		1.14667	-164	1.14667	-101	1.14667	-128		1.148	-0.154019	-0.0203926	-0.00418614	-0.0889314	1.14667	-225
		1.148	-162	1.148	-109	1.148	-129		1.14933	-0.144511	-0.0217022	-0.00428349	-0.0881778	1.148	-236
		1.14933	-152	1.14933	-116	1.14933	-132		1.15067	-0.143561	-0.0217022	-0.0043484	-0.0862936	1.14933	-234
		1.15067	-151	1.15067	-116	1.15067	-134		1.152	-0.15592	-0.0196442	-0.0043484	-0.0911924	1.15067	-229
		1.152	-164	1.152	-105	1.152	-134		1.15333	-0.153068	-0.0207668	-0.0043484	-0.0923229	1.152	-242
		1.15333	-161	1.15333	-111	1.15333	-134		1.15467	-0.148314	-0.0226376	-0.00431595	-0.0926997	1.15333	-245
		1.15467	-156	1.15467	-121	1.15467	-133		1.156	-0.148314	-0.0218893	-0.00431595	-0.0930765	1.15467	-246
		1.156	-156	1.156	-117	1.156	-133		1.15733	-0.154019	-0.0217022	-0.0044133	-0.0934534	1.156	-247
		1.15733	-162	1.15733	-116	1.15733	-136		1.15867	-0.150216	-0.0211409	-0.00451065	-0.0972216	1.15733	-248
		1.15867	-158	1.15867	-113	1.15867	-139		1.16	-0.148314	-0.0203926	-0.00457555	-0.0975985	1.15867	-258
		1.16	-156	1.16	-109	1.16	-141		1.16133	-0.147364	-0.0211409	-0.0044782	-0.094207	1.16	-259
		1.16133	-155	1.16133	-113	1.16133	-138		1.16267	-0.143561	-0.0211409	-0.00415369	-0.0889314	1.16133	-250
		1.16267	-151	1.16267	-113	1.16267	-128		1.164	-0.144511	-0.0205797	-0.00395899	-0.0866705	1.16267	-236
		1.164	-152	1.164	-110	1.164	-122		1.16533	-0.145462	-0.0200184	-0.00399144	-0.0870473	1.164	-230
		1.16533	-153	1.16533	-107	1.16533	-123		1.16667	-0.146413	-0.0211409	-0.00421859	-0.0900619	1.16533	-231
		1.16667	-154	1.16667	-113	1.16667	-130		1.168	-0.145462	-0.0205797	-0.00444575	-0.0874241	1.16667	-239
		1.168	-153	1.168	-110	1.168	-137		1.16933	-0.147364	-0.0203926	-0.00444575	-0.0904387	1.168	-232
		1.16933	-155	1.16933	-109	1.16933	-137		1.17067	-0.153068	-0.0209538	-0.00431595	-0.0949607	1.16933	-240
		1.17067	-161	1.17067	-112	1.17067	-133		1.172	-0.153068	-0.0202055	-0.00415369	-0.098729	1.17067	-252
		1.172	-161	1.172	-108	1.172	-128		1.17333	-0.127398	-0.0215151	-0.00389409	-0.0979753	1.172	-262
		1.17333	-134	1.17333	-115	1.17333	-120		1.17467	-0.124546	-0.0226376	-0.00392654	-0.0938302	1.17333	-260
		1.17467	-131	1.17467	-121	1.17467	-121		1.176	-0.134053	-0.0231989	-0.00405634	-0.0908156	1.17467	-249
		1.176	-141	1.176	-124	1.176	-125		1.17733	-0.148314	-0.0226376	-0.00428349	-0.0915692	1.176	-241
		1.17733	-156	1.17733	-121	1.17733	-132		1.17867	-0.159723	-0.0224506	-0.004608	-0.0949607	1.17733	-243
		1.17867	-168	1.17867	-120	1.17867	-142		1.18	-0.152117	-0.0228247	-0.00464045	-0.0949607	1.17867	-252
		1.18	-160	1.18	-122	1.18	-143		1.18133	-0.145462	-0.0231989	-0.00457555	-0.0945838	1.18	-252
		1.18133	-153	1.18133	-124	1.18133	-141		1.18267	-0.147364	-0.0243214	-0.0045431	-0.0960912	1.18133	-251
		1.18267	-155	1.18267	-130	1.18267	-140		1.184	-0.159723	-0.0252569	-0.00395899	-0.0949607	1.18267	-255
		1.184	-168	1.184	-135	1.184	-122		1.18533	-0.160674	-0.0260052	-0.00408879	-0.0957143	1.184	-252
		1.18533	-169	1.18533	-139	1.18533	-126		1.18667	-0.157822	-0.0267536	-0.00438085	-0.0968448	1.18533	-254
		1.18667	-166	1.18667	-143	1.18667	-135		1.188	-0.154969	-0.0273148	-0.0043484	-0.0938302	1.18667	-257
		1.188	-163	1.188	-146	1.188	-134		1.18933	-0.151167	-0.0263794	-0.00438085	-0.0975985	1.188	-249
		1.18933	-159	1.18933	-141	1.18933	-135		1.19067	-0.148314	-0.0258181	-0.00451065	-0.100613	1.18933	-259
		1.19067	-156	1.19067	-138	1.19067	-139		1.192	-0.145462	-0.0271278	-0.0047378	-0.10212	1.19067	-267
		1.192	-153	1.192	-145	1.192	-146		1.19333	-0.141659	-0.0239473	-0.00496496	-0.098729	1.192	-271
		1.19333	-149	1.19333	-128	1.19333	-153		1.19467	-0.145462	-0.0230118	-0.0043484	-0.0979753	1.19333	-262
		1.19467	-153	1.19467	-123	1.19467	-134		1.196	-0.157822	-0.0231989	-0.00412124	-0.0983521	1.19467	-260
		1.196	-166	1.196	-124	1.196	-127		1.19733	-0.170181	-0.0226376	-0.00421859	-0.0994826	1.196	-261
		1.19733	-179	1.19733	-121	1.19733	-130		1.19867	-0.175886	-0.0246956	-0.00418614	-0.0991058	1.19733	-264
		1.19867	-185	1.19867	-132	1.19867	-129		1.2	-0.170181	-0.0252569	-0.00405634	-0.0994826	1.19867	-263
		1.2	-179	1.2	-135	1.2	-125		1.20133	-0.16828	-0.0245085	-0.00405634	-0.0998594	1.2	-264
		1.20133	-177	1.20133	-131	1.20133	-125		1.20267	-0.167329	-0.0248827	-0.00418614	-0.098729	1.20133	-265
		1.20267	-176	1.20267	-133	1.20267	-129		1.204	-0.15592	-0.0245085	-0.00444575	-0.0945838	1.20267	-262
		1.204	-164	1.204	-131	1.204	-137		1.20533	-0.156871	-0.0241343	-0.00428349	-0.0934534	1.204	-251
		1.20533	-165	1.20533	-129	1.20533	-132		1.20667	-0.15592	-0.0243214	-0.00415369	-0.0972216	1.20533	-248
		1.20667	-164	1.20667	-130	1.20667	-128		1.208	-0.156871	-0.0246956	-0.00412124	-0.106266	1.20667	-258
		1.208	-165	1.208	-132	1.208	-127		1.20933	-0.16923	-0.0246956	-0.00369938	-0.0991058	1.208	-282
		1.20933	-178	1.20933	-132	1.20933	-114		1.21067	-0.167329	-0.0252569	-0.00405634	-0.0953375	1.20933	-263
		1.21067	-176	1.21067	-135	1.21067	-125		1.212	-0.16828	-0.0260052	-0.0044133	-0.0972216	1.21067	-253
		1.212	-177	1.212	-139	1.212	-136		1.21333	-0.174935	-0.0243214	-0.0045431	-0.104381	1.212	-258
		1.21333	-184	1.21333	-130	1.21333	-140		1.21467	-0.172083	-0.0245085	-0.00464045	-0.10212	1.21333	-277
		1.21467	-181	1.21467	-131	1.21467	-143		1.216	-0.16828	-0.0252569	-0.0045431	-0.101367	1.21467	-271
		1.216	-177	1.216	-135	1.216	-140		1.21733	-0.164477	-0.0248827	-0.00444575	-0.100236	1.216	-269
		1.21733	-173	1.21733	-133	1.21733	-137		1.21867	-0.158772	-0.0239473	-0.0044782	-0.0968448	1.21733	-266
		1.21867	-167	1.21867	-128	1.21867	-138		1.22	-0.15592	-0.0239473	-0.00421859	-0.100236	1.21867	-257
		1.22	-164	1.22	-128	1.22	-130		1.22133	-0.158772	-0.0241343	-0.0044133	-0.100613	1.22	-266
		1.22133	-167	1.22133	-129	1.22133	-136		1.22267	-0.161625	-0.0239473	-0.004608	-0.098729	1.22133	-267
		1.22267	-170	1.22267	-128	1.22267	-142		1.224	-0.162575	-0.0246956	-0.0044133	-0.100613	1.22267	-262
		1.224	-171	1.224	-132	1.224	-136		1.22533	-0.163526	-0.0248827	-0.0044782	-0.101744	1.224	-267
		1.22533	-172	1.22533	-133	1.22533	-138		1.22667	-0.166378	-0.0250698	-0.00457555	-0.10212	1.22533	-270
		1.22667	-175	1.22667	-134	1.22667	-141		1.228	-0.166378	-0.0267536	-0.00464045	-0.102497	1.22667	-271
		1.228	-175	1.228	-143	1.228	-143		1.22933	-0.158772	-0.0243214	-0.00464045	-0.104381	1.228	-272
		1.22933	-167	1.22933	-130	1.22933	-143		1.23067	-0.154019	-0.0237602	-0.00415369	-0.102874	1.22933	-277
		1.23067	-162	1.23067	-127	1.23067	-128		1.232	-0.164477	-0.0245085	-0.00408879	-0.100613	1.23067	-273
		1.232	-173	1.232	-131	1.232	-126		1.23333	-0.174935	-0.0245085	-0.00425104	-0.0975985	1.232	-267
		1.23333	-184	1.23333	-131	1.23333	-131		1.23467	-0.171132	-0.0243214	-0.0044133	-0.0975985	1.23333	-259
		1.23467	-180	1.23467	-130	1.23467	-136		1.236	-0.16923	-0.023386	-0.00444575	-0.10212	1.23467	-259
		1.236	-178	1.236	-125	1.236	-137		1.23733	-0.166378	-0.0218893	-0.00444575	-0.104758	1.236	-271
		1.23733	-175	1.23733	-117	1.23733	-137		1.23867	-0.163526	-0.0205797	-0.0044133	-0.104381	1.23733	-278
		1.23867	-172	1.23867	-110	1.23867	-136		1.24	-0.160674	-0.021328	-0.00431595	-0.106642	1.23867	-277
		1.24	-169	1.24	-114	1.24	-133		1.24133	-0.164477	-0.0218893	-0.00451065	-0.103251	1.24	-283
		1.24133	-173	1.24133	-117	1.24133	-139		1.24267	-0.165428	-0.0222635	-0.00451065	-0.10099	1.24133	-274
		1.24267	-174	1.24267	-119	1.24267	-139		1.244	-0.165428	-0.0231989	-0.00444575	-0.102497	1.24267	-268
		1.244	-174	1.244	-124	1.244	-137		1.24533	-0.16923	-0.0265665	-0.00493251	-0.109657	1.244	-272
		1.24533	-178	1.24533	-142	1.24533	-152		1.24667	-0.157822	-0.0271278	-0.0045431	-0.107773	1.24533	-291
		1.24667	-166	1.24667	-145	1.24667	-140		1.248	-0.154019	-0.0237602	-0.00438085	-0.105512	1.24667	-286
		1.248	-162	1.248	-127	1.248	-135		1.24933	-0.161625	-0.0248827	-0.00477026	-0.10928	1.248	-280
		1.24933	-170	1.24933	-133	1.24933	-147		1.25067	-0.16828	-0.025444	-0.00496496	-0.107396	1.24933	-290
		1.25067	-177	1.25067	-136	1.25067	-153		1.252	-0.172083	-0.0245085	-0.00493251	-0.103628	1.25067	-285
		1.252	-181	1.252	-131	1.252	-152		1.25333	-0.170181	-0.0224506	-0.00493251	-0.0998594	1.252	-275
		1.25333	-179	1.25333	-120	1.25333	-152		1.25467	-0.166378	-0.0230118	-0.00499741	-0.0991058	1.25333	-265
		1.25467	-175	1.25467	-123	1.25467	-154		1.256	-0.166378	-0.0237602	-0.00425104	-0.101744	1.25467	-263
		1.256	-175	1.256	-127	1.256	-131		1.25733	-0.167329	-0.0245085	-0.00438085	-0.104005	1.256	-270
		1.25733	-176	1.25733	-131	1.25733	-135		1.25867	-0.171132	-0.0252569	-0.00457555	-0.104005	1.25733	-276
		1.25867	-180	1.25867	-135	1.25867	-141		1.26	-0.177787	-0.0237602	-0.00415369	-0.0994826	1.25867	-276
		1.26	-187	1.26	-127	1.26	-128		1.26133	-0.163526	-0.0220764	-0.0046729	-0.101367	1.26	-264
		1.26133	-172	1.26133	-118	1.26133	-144		1.26267	-0.162575	-0.021328	-0.0046729	-0.10099	1.26133	-269
		1.26267	-171	1.26267	-114	1.26267	-144		1.264	-0.166378	-0.0226376	-0.00444575	-0.0975985	1.26267	-268
		1.264	-175	1.264	-121	1.264	-137		1.26533	-0.165428	-0.0209538	-0.00451065	-0.0968448	1.264	-259
		1.26533	-174	1.26533	-112	1.26533	-139		1.26667	-0.172083	-0.0215151	-0.00431595	-0.0953375	1.26533	-257
		1.26667	-181	1.26667	-115	1.26667	-133		1.268	-0.177787	-0.0237602	-0.00415369	-0.0953375	1.26667	-253
		1.268	-187	1.268	-127	1.268	-128		1.26933	-0.18159	-0.025631	-0.00415369	-0.0975985	1.268	-253
		1.26933	-191	1.26933	-137	1.26933	-128		1.27067	-0.184442	-0.0250698	-0.0044133	-0.104005	1.26933	-259
		1.27067	-194	1.27067	-134	1.27067	-136		1.272	-0.183491	-0.0245085	-0.00415369	-0.105135	1.27067	-276
		1.272	-193	1.272	-131	1.272	-128		1.27333	-0.176836	-0.0245085	-0.00408879	-0.106266	1.272	-279
		1.27333	-186	1.27333	-131	1.27333	-126		1.27467	-0.172083	-0.0230118	-0.00421859	-0.10815	1.27333	-282
		1.27467	-181	1.27467	-123	1.27467	-130		1.276	-0.184442	-0.0239473	-0.00425104	-0.106642	1.27467	-287
		1.276	-194	1.276	-128	1.276	-131		1.27733	-0.185393	-0.0245085	-0.00470535	-0.105135	1.276	-283
		1.27733	-195	1.27733	-131	1.27733	-145		1.27867	-0.182541	-0.0243214	-0.0046729	-0.105135	1.27733	-279
		1.27867	-192	1.27867	-130	1.27867	-144		1.28	-0.177787	-0.023386	-0.00431595	-0.106642	1.27867	-279
		1.28	-187	1.28	-125	1.28	-133		1.28133	-0.176836	-0.0218893	-0.00477026	-0.106642	1.28	-283
		1.28133	-186	1.28133	-117	1.28133	-147		1.28267	-0.185393	-0.0215151	-0.0047378	-0.104758	1.28133	-283
		1.28267	-195	1.28267	-115	1.28267	-146		1.284	-0.189196	-0.0224506	-0.0045431	-0.104381	1.28267	-278
		1.284	-199	1.284	-120	1.284	-140		1.28533	-0.185393	-0.0217022	-0.0043484	-0.106642	1.284	-277
		1.28533	-195	1.28533	-116	1.28533	-134		1.28667	-0.184442	-0.0226376	-0.00451065	-0.106266	1.28533	-283
		1.28667	-194	1.28667	-121	1.28667	-139		1.288	-0.176836	-0.0230118	-0.00438085	-0.104758	1.28667	-282
		1.288	-186	1.288	-123	1.288	-135		1.28933	-0.171132	-0.0215151	-0.0044133	-0.103251	1.288	-278
		1.28933	-180	1.28933	-115	1.28933	-136		1.29067	-0.170181	-0.0222635	-0.0047378	-0.103628	1.28933	-274
		1.29067	-179	1.29067	-119	1.29067	-146		1.292	-0.18159	-0.0220764	-0.0045431	-0.104381	1.29067	-275
		1.292	-191	1.292	-118	1.292	-140		1.29333	-0.190147	-0.021328	-0.0045431	-0.100236	1.292	-277
		1.29333	-200	1.29333	-114	1.29333	-140		1.29467	-0.191097	-0.0209538	-0.00457555	-0.0968448	1.29333	-266
		1.29467	-201	1.29467	-112	1.29467	-141		1.296	-0.182541	-0.0226376	-0.0045431	-0.103628	1.29467	-257
		1.296	-192	1.296	-121	1.296	-140		1.29733	-0.179689	-0.0239473	-0.00477026	-0.10212	1.296	-275
		1.29733	-189	1.29733	-128	1.29733	-147		1.29867	-0.190147	-0.0246956	-0.00486761	-0.102497	1.29733	-271
		1.29867	-200	1.29867	-132	1.29867	-150		1.3	-0.198703	-0.025444	-0.00490006	-0.105135	1.29867	-272
		1.3	-209	1.3	-136	1.3	-151		1.30133	-0.197752	-0.0243214	-0.00480271	-0.108526	1.3	-279
		1.30133	-208	1.30133	-130	1.30133	-148		1.30267	-0.209161	-0.0241343	-0.00470535	-0.105889	1.30133	-288
		1.30267	-220	1.30267	-129	1.30267	-145		1.304	-0.206309	-0.0252569	-0.00438085	-0.104381	1.30267	-281
		1.304	-217	1.304	-135	1.304	-135		1.30533	-0.195851	-0.0269407	-0.00405634	-0.105135	1.304	-277
		1.30533	-206	1.30533	-144	1.30533	-125		1.30667	-0.185393	-0.0239473	-0.0044133	-0.105135	1.30533	-279
		1.30667	-195	1.30667	-128	1.30667	-136		1.308	-0.16828	-0.0218893	-0.00425104	-0.103251	1.30667	-279
		1.308	-177	1.308	-117	1.308	-131		1.30933	-0.161625	-0.0217022	-0.00428349	-0.102874	1.308	-274
		1.30933	-170	1.30933	-116	1.30933	-132		1.31067	-0.164477	-0.0228247	-0.00457555	-0.103628	1.30933	-273
		1.31067	-173	1.31067	-122	1.31067	-141		1.312	-0.173984	-0.0230118	-0.00470535	-0.100613	1.31067	-275
		1.312	-183	1.312	-123	1.312	-145		1.31333	-0.180639	-0.0230118	-0.0044782	-0.10099	1.312	-267
		1.31333	-190	1.31333	-123	1.31333	-138		1.31467	-0.182541	-0.0230118	-0.00431595	-0.101367	1.31333	-268
		1.31467	-192	1.31467	-123	1.31467	-133		1.316	-0.184442	-0.0235731	-0.00438085	-0.101367	1.31467	-269
		1.316	-194	1.316	-126	1.316	-135		1.31733	-0.191097	-0.0260052	-0.00438085	-0.107019	1.316	-269
		1.31733	-201	1.31733	-139	1.31733	-135		1.31867	-0.197752	-0.0265665	-0.00431595	-0.107396	1.31733	-284
		1.31867	-208	1.31867	-142	1.31867	-133		1.32	-0.195851	-0.0252569	-0.00444575	-0.106642	1.31867	-285
		1.32	-206	1.32	-135	1.32	-137		1.32133	-0.186344	-0.0267536	-0.00486761	-0.108526	1.32	-283
		1.32133	-196	1.32133	-143	1.32133	-150		1.32267	-0.177787	-0.0252569	-0.00499741	-0.10928	1.32133	-288
		1.32267	-187	1.32267	-135	1.32267	-154		1.324	-0.18159	-0.0239473	-0.00496496	-0.108526	1.32267	-290
		1.324	-191	1.324	-128	1.324	-153		1.32533	-0.184442	-0.0250698	-0.00477026	-0.107396	1.324	-288
		1.32533	-194	1.32533	-134	1.32533	-147		1.32667	-0.185393	-0.025444	-0.0044782	-0.107773	1.32533	-285
		1.32667	-195	1.32667	-136	1.32667	-138		1.328	-0.184442	-0.0269407	-0.0047378	-0.110411	1.32667	-286
		1.328	-194	1.328	-144	1.328	-146		1.32933	-0.184442	-0.0271278	-0.00493251	-0.111164	1.328	-293
		1.32933	-194	1.32933	-145	1.32933	-152		1.33067	-0.182541	-0.0248827	-0.00490006	-0.10928	1.32933	-295
		1.33067	-192	1.33067	-133	1.33067	-151		1.332	-0.176836	-0.0250698	-0.004608	-0.104381	1.33067	-290
		1.332	-186	1.332	-134	1.332	-142		1.33333	-0.188245	-0.0252569	-0.00506231	-0.106266	1.332	-277
		1.33333	-198	1.33333	-135	1.33333	-156		1.33467	-0.189196	-0.0260052	-0.00486761	-0.105512	1.33333	-282
		1.33467	-199	1.33467	-139	1.33467	-150		1.336	-0.189196	-0.0284374	-0.0044782	-0.105135	1.33467	-280
		1.336	-199	1.336	-152	1.336	-138		1.33733	-0.196802	-0.0258181	-0.00464045	-0.115309	1.336	-279
		1.33733	-207	1.33733	-138	1.33733	-143		1.33867	-0.200605	-0.0245085	-0.00499741	-0.113425	1.33733	-306
		1.33867	-211	1.33867	-131	1.33867	-154		1.34	-0.197752	-0.0246956	-0.00522457	-0.110034	1.33867	-301
		1.34	-208	1.34	-132	1.34	-161		1.34133	-0.1949	-0.025631	-0.00532192	-0.10928	1.34	-292
		1.34133	-205	1.34133	-137	1.34133	-164		1.34267	-0.195851	-0.0235731	-0.00532192	-0.110411	1.34133	-290
		1.34267	-206	1.34267	-126	1.34267	-164		1.344	-0.198703	-0.0231989	-0.00512721	-0.108903	1.34267	-293
		1.344	-209	1.344	-124	1.344	-158		1.34533	-0.192999	-0.0248827	-0.00512721	-0.107019	1.344	-289
		1.34533	-203	1.34533	-133	1.34533	-158		1.34667	-0.188245	-0.0284374	-0.00528947	-0.104758	1.34533	-284
		1.34667	-198	1.34667	-152	1.34667	-163		1.348	-0.196802	-0.0263794	-0.00538682	-0.106266	1.34667	-278
		1.348	-207	1.348	-141	1.348	-166		1.34933	-0.188245	-0.0250698	-0.00493251	-0.106642	1.348	-282
		1.34933	-198	1.34933	-134	1.34933	-152		1.35067	-0.188245	-0.025444	-0.00477026	-0.105889	1.34933	-283
		1.35067	-198	1.35067	-136	1.35067	-147		1.352	-0.196802	-0.025631	-0.00490006	-0.104381	1.35067	-281
		1.352	-207	1.352	-137	1.352	-151		1.35333	-0.201555	-0.0250698	-0.00496496	-0.107396	1.352	-277
		1.35333	-212	1.35333	-134	1.35333	-153		1.35467	-0.202506	-0.0258181	-0.00486761	-0.108526	1.35333	-285
		1.35467	-213	1.35467	-138	1.35467	-150		1.356	-0.198703	-0.0278761	-0.00490006	-0.107773	1.35467	-288
		1.356	-209	1.356	-149	1.356	-151		1.35733	-0.191097	-0.025631	-0.00515966	-0.105512	1.356	-286
		1.35733	-201	1.35733	-137	1.35733	-159		1.35867	-0.192999	-0.0269407	-0.00515966	-0.105135	1.35733	-280
		1.35867	-203	1.35867	-144	1.35867	-159		1.36	-0.182541	-0.027689	-0.00509476	-0.104381	1.35867	-279
		1.36	-192	1.36	-148	1.36	-157		1.36133	-0.16923	-0.025631	-0.00515966	-0.105135	1.36	-277
		1.36133	-178	1.36133	-137	1.36133	-159		1.36267	-0.161625	-0.0265665	-0.00538682	-0.108526	1.36133	-279
		1.36267	-170	1.36267	-142	1.36267	-166		1.364	-0.179689	-0.0273148	-0.00528947	-0.113048	1.36267	-288
		1.364	-189	1.364	-146	1.364	-163		1.36533	-0.187294	-0.0275019	-0.00515966	-0.111918	1.364	-300
		1.36533	-197	1.36533	-147	1.36533	-159		1.36667	-0.187294	-0.0267536	-0.00515966	-0.107396	1.36533	-297
		1.36667	-197	1.36667	-143	1.36667	-159		1.368	-0.186344	-0.0280632	-0.00541927	-0.103251	1.36667	-285
		1.368	-196	1.368	-150	1.368	-167		1.36933	-0.192048	-0.0280632	-0.00541927	-0.10099	1.368	-274
		1.36933	-202	1.36933	-150	1.36933	-167		1.37067	-0.205358	-0.0284374	-0.00528947	-0.104758	1.36933	-268
		1.37067	-216	1.37067	-152	1.37067	-163		1.372	-0.217718	-0.0303082	-0.00506231	-0.111164	1.37067	-278
		1.372	-229	1.372	-162	1.372	-156		1.37333	-0.221521	-0.0273148	-0.00493251	-0.113802	1.372	-295
		1.37333	-233	1.37333	-146	1.37333	-152		1.37467	-0.203457	-0.0250698	-0.00512721	-0.110787	1.37333	-302
		1.37467	-214	1.37467	-134	1.37467	-158		1.376	-0.189196	-0.0245085	-0.00545172	-0.10928	1.37467	-294
		1.376	-199	1.376	-131	1.376	-168		1.37733	-0.182541	-0.025631	-0.00574378	-0.110034	1.376	-290
		1.37733	-192	1.37733	-137	1.37733	-177		1.37867	-0.188245	-0.0269407	-0.00558152	-0.10928	1.37733	-292
		1.37867	-198	1.37867	-144	1.37867	-172		1.38	-0.189196	-0.0278761	-0.00519211	-0.108903	1.37867	-290
		1.38	-199	1.38	-149	1.38	-160		1.38133	-0.196802	-0.0284374	-0.00519211	-0.111164	1.38	-289
		1.38133	-207	1.38133	-152	1.38133	-160		1.38267	-0.205358	-0.0282503	-0.00532192	-0.113802	1.38133	-295
		1.38267	-216	1.38267	-151	1.38267	-164		1.384	-0.209161	-0.027689	-0.00502986	-0.106266	1.38267	-302
		1.384	-220	1.384	-148	1.384	-155		1.38533	-0.206309	-0.0280632	-0.00483516	-0.104758	1.384	-282
		1.38533	-217	1.38533	-150	1.38533	-149		1.38667	-0.205358	-0.0288115	-0.00486761	-0.107019	1.38533	-278
		1.38667	-216	1.38667	-154	1.38667	-150		1.388	-0.205358	-0.0275019	-0.00499741	-0.110787	1.38667	-284
		1.388	-216	1.388	-147	1.388	-154		1.38933	-0.203457	-0.0241343	-0.00486761	-0.110034	1.388	-294
		1.38933	-214	1.38933	-129	1.38933	-150		1.39067	-0.209161	-0.0228247	-0.00499741	-0.108526	1.38933	-292
		1.39067	-220	1.39067	-122	1.39067	-154		1.392	-0.211063	-0.0237602	-0.00519211	-0.108526	1.39067	-288
		1.392	-222	1.392	-127	1.392	-160		1.39333	-0.210112	-0.0243214	-0.00525702	-0.110411	1.392	-288
		1.39333	-221	1.39333	-130	1.39333	-162		1.39467	-0.216767	-0.0263794	-0.00496496	-0.109657	1.39333	-293
		1.39467	-228	1.39467	-141	1.39467	-153		1.396	-0.214866	-0.027689	-0.00509476	-0.110411	1.39467	-291
		1.396	-226	1.396	-148	1.396	-157		1.39733	-0.212964	-0.0269407	-0.00512721	-0.110034	1.396	-293
		1.39733	-224	1.39733	-144	1.39733	-158		1.39867	-0.212964	-0.0278761	-0.00493251	-0.106642	1.39733	-292
		1.39867	-224	1.39867	-149	1.39867	-152		1.4	-0.202506	-0.0286245	-0.00515966	-0.104005	1.39867	-283
		1.4	-213	1.4	-153	1.4	-159		1.40133	-0.204408	-0.0288115	-0.00490006	-0.106266	1.4	-276
		1.40133	-215	1.40133	-154	1.40133	-151		1.40267	-0.211063	-0.0286245	-0.004608	-0.109657	1.40133	-282
		1.40267	-222	1.40267	-153	1.40267	-142		1.404	-0.214866	-0.0284374	-0.0047378	-0.107773	1.40267	-291
		1.404	-226	1.404	-152	1.404	-146		1.40533	-0.211063	-0.0273148	-0.00483516	-0.107773	1.404	-286
		1.40533	-222	1.40533	-146	1.40533	-149		1.40667	-0.209161	-0.0265665	-0.00480271	-0.106266	1.40533	-286
		1.40667	-220	1.40667	-142	1.40667	-148		1.408	-0.206309	-0.0271278	-0.0047378	-0.104381	1.40667	-282
		1.408	-217	1.408	-145	1.408	-146		1.40933	-0.199654	-0.0295599	-0.00477026	-0.105135	1.408	-277
		1.40933	-210	1.40933	-158	1.40933	-147		1.41067	-0.19395	-0.0299341	-0.00483516	-0.103628	1.40933	-279
		1.41067	-204	1.41067	-160	1.41067	-149		1.412	-0.197752	-0.0291857	-0.00477026	-0.105889	1.41067	-275
		1.412	-208	1.412	-156	1.412	-147		1.41333	-0.205358	-0.0284374	-0.00470535	-0.111541	1.412	-281
		1.41333	-216	1.41333	-152	1.41333	-145		1.41467	-0.20726	-0.027689	-0.00480271	-0.114933	1.41333	-296
		1.41467	-218	1.41467	-148	1.41467	-148		1.416	-0.213915	-0.0288115	-0.00532192	-0.113425	1.41467	-305
		1.416	-225	1.416	-154	1.416	-164		1.41733	-0.213915	-0.0308695	-0.00548417	-0.112672	1.416	-301
		1.41733	-225	1.41733	-165	1.41733	-169		1.41867	-0.211063	-0.0304953	-0.00535437	-0.113425	1.41733	-299
		1.41867	-222	1.41867	-163	1.41867	-165		1.42	-0.214866	-0.0278761	-0.00506231	-0.107019	1.41867	-301
		1.42	-226	1.42	-149	1.42	-156		1.42133	-0.206309	-0.0260052	-0.00496496	-0.103628	1.42	-284
		1.42133	-217	1.42133	-139	1.42133	-153		1.42267	-0.20726	-0.025631	-0.00502986	-0.103628	1.42133	-275
		1.42267	-218	1.42267	-137	1.42267	-155		1.424	-0.215816	-0.0271278	-0.00522457	-0.107019	1.42267	-275
		1.424	-227	1.424	-145	1.424	-161		1.42533	-0.219619	-0.0269407	-0.00532192	-0.10815	1.424	-284
		1.42533	-231	1.42533	-144	1.42533	-164		1.42667	-0.212013	-0.0261923	-0.00515966	-0.111541	1.42533	-287
		1.42667	-223	1.42667	-140	1.42667	-159		1.428	-0.211063	-0.025444	-0.00515966	-0.113048	1.42667	-296
		1.428	-222	1.428	-136	1.428	-159		1.42933	-0.215816	-0.0269407	-0.00545172	-0.10928	1.428	-300
		1.42933	-227	1.42933	-144	1.42933	-168		1.43067	-0.212013	-0.027689	-0.00535437	-0.110034	1.42933	-290
		1.43067	-223	1.43067	-148	1.43067	-165		1.432	-0.209161	-0.0278761	-0.00515966	-0.107773	1.43067	-292
		1.432	-220	1.432	-149	1.432	-159		1.43333	-0.213915	-0.0280632	-0.00502986	-0.105889	1.432	-286
		1.43333	-225	1.43333	-150	1.43333	-155		1.43467	-0.224373	-0.0289986	-0.00493251	-0.10928	1.43333	-281
		1.43467	-236	1.43467	-155	1.43467	-152		1.436	-0.216767	-0.0289986	-0.00480271	-0.10928	1.43467	-290
		1.436	-228	1.436	-155	1.436	-148		1.43733	-0.212964	-0.0291857	-0.00486761	-0.111164	1.436	-290
		1.43733	-224	1.43733	-156	1.43733	-150		1.43867	-0.212964	-0.0303082	-0.00490006	-0.113048	1.43733	-295
		1.43867	-224	1.43867	-162	1.43867	-151		1.44	-0.215816	-0.0295599	-0.00480271	-0.110034	1.43867	-300
		1.44	-227	1.44	-158	1.44	-148		1.44133	-0.221521	-0.0306824	-0.00477026	-0.112672	1.44	-292
		1.44133	-233	1.44133	-164	1.44133	-147		1.44267	-0.218669	-0.0323662	-0.00499741	-0.114933	1.44133	-299
		1.44267	-230	1.44267	-173	1.44267	-154		1.444	-0.213915	-0.0316179	-0.00535437	-0.116063	1.44267	-305
		1.444	-225	1.444	-169	1.444	-165		1.44533	-0.216767	-0.031992	-0.00561397	-0.11757	1.444	-308
		1.44533	-228	1.44533	-171	1.44533	-173		1.44667	-0.212964	-0.0318049	-0.00558152	-0.11757	1.44533	-312
		1.44667	-224	1.44667	-170	1.44667	-172		1.448	-0.204408	-0.0308695	-0.00541927	-0.115309	1.44667	-312
		1.448	-215	1.448	-165	1.448	-167		1.44933	-0.200605	-0.0304953	-0.00519211	-0.111541	1.448	-306
		1.44933	-211	1.44933	-163	1.44933	-160		1.45067	-0.213915	-0.0288115	-0.00499741	-0.110787	1.44933	-296
		1.45067	-225	1.45067	-154	1.45067	-154		1.452	-0.213915	-0.0289986	-0.00528947	-0.114179	1.45067	-294
		1.452	-225	1.452	-155	1.452	-163		1.45333	-0.212964	-0.0306824	-0.00519211	-0.116817	1.452	-303
		1.45333	-224	1.45333	-164	1.45333	-160		1.45467	-0.214866	-0.0308695	-0.00480271	-0.11644	1.45333	-310
		1.45467	-226	1.45467	-165	1.45467	-148		1.456	-0.217718	-0.0312437	-0.00509476	-0.110787	1.45467	-309
		1.456	-229	1.456	-167	1.456	-157		1.45733	-0.208211	-0.0310566	-0.00538682	-0.108526	1.456	-294
		1.45733	-219	1.45733	-166	1.45733	-166		1.45867	-0.210112	-0.0308695	-0.00535437	-0.108903	1.45733	-288
		1.45867	-221	1.45867	-165	1.45867	-165		1.46	-0.218669	-0.0316179	-0.00515966	-0.111541	1.45867	-289
		1.46	-230	1.46	-169	1.46	-159		1.46133	-0.215816	-0.0316179	-0.00535437	-0.113048	1.46	-296
		1.46133	-227	1.46133	-169	1.46133	-165		1.46267	-0.221521	-0.0321791	-0.00564642	-0.114556	1.46133	-300
		1.46267	-233	1.46267	-172	1.46267	-174		1.464	-0.225324	-0.0333017	-0.00571133	-0.115309	1.46267	-304
		1.464	-237	1.464	-178	1.464	-176		1.46533	-0.225324	-0.0327404	-0.00551662	-0.115686	1.464	-306
		1.46533	-237	1.46533	-175	1.46533	-170		1.46667	-0.212964	-0.0336758	-0.00561397	-0.115309	1.46533	-307
		1.46667	-224	1.46667	-180	1.46667	-173		1.468	-0.219619	-0.0338629	-0.00574378	-0.111918	1.46667	-306
		1.468	-231	1.468	-181	1.468	-177		1.46933	-0.226274	-0.0325533	-0.00571133	-0.108526	1.468	-297
		1.46933	-238	1.46933	-174	1.46933	-176		1.47067	-0.225324	-0.0327404	-0.00551662	-0.110411	1.46933	-288
		1.47067	-237	1.47067	-175	1.47067	-170		1.472	-0.215816	-0.0327404	-0.00584113	-0.107396	1.47067	-293
		1.472	-227	1.472	-175	1.472	-180		1.47333	-0.213915	-0.0331146	-0.00613319	-0.103628	1.472	-285
		1.47333	-225	1.47333	-177	1.47333	-189		1.47467	-0.218669	-0.0344242	-0.00629544	-0.10212	1.47333	-275
		1.47467	-230	1.47467	-184	1.47467	-194		1.476	-0.228176	-0.0327404	-0.00626299	-0.107773	1.47467	-271
		1.476	-240	1.476	-175	1.476	-193		1.47733	-0.22057	-0.0327404	-0.00574378	-0.109657	1.476	-286
		1.47733	-232	1.47733	-175	1.47733	-177		1.47867	-0.221521	-0.0334887	-0.00584113	-0.10815	1.47733	-291
		1.47867	-233	1.47867	-179	1.47867	-180		1.48	-0.227225	-0.0338629	-0.00597093	-0.105889	1.47867	-287
		1.48	-239	1.48	-181	1.48	-184		1.48133	-0.23293	-0.0329275	-0.00548417	-0.110787	1.48	-281
		1.48133	-245	1.48133	-176	1.48133	-169		1.48267	-0.236733	-0.0336758	-0.00567888	-0.115309	1.48133	-294
		1.48267	-249	1.48267	-180	1.48267	-175		1.484	-0.229127	-0.0349854	-0.00577623	-0.116063	1.48267	-306
		1.484	-241	1.484	-187	1.484	-178		1.48533	-0.222472	-0.0344242	-0.00590603	-0.113802	1.484	-308
		1.48533	-234	1.48533	-184	1.48533	-182		1.48667	-0.229127	-0.0318049	-0.00639279	-0.114556	1.48533	-302
		1.48667	-241	1.48667	-170	1.48667	-197		1.488	-0.230077	-0.0310566	-0.00632789	-0.11757	1.48667	-304
		1.488	-242	1.488	-166	1.488	-195		1.48933	-0.235782	-0.0321791	-0.00603583	-0.116817	1.488	-312
		1.48933	-248	1.48933	-172	1.48933	-186		1.49067	-0.241486	-0.0357338	-0.00571133	-0.111918	1.48933	-310
		1.49067	-254	1.49067	-191	1.49067	-176		1.492	-0.237683	-0.0368563	-0.00577623	-0.111541	1.49067	-297
		1.492	-250	1.492	-197	1.492	-178		1.49333	-0.23293	-0.0366692	-0.00593848	-0.113048	1.492	-296
		1.49333	-245	1.49333	-196	1.49333	-183		1.49467	-0.226274	-0.0355467	-0.00606828	-0.115309	1.49333	-300
		1.49467	-238	1.49467	-190	1.49467	-187		1.496	-0.219619	-0.0349854	-0.00623054	-0.118324	1.49467	-306
		1.496	-231	1.496	-187	1.496	-192		1.49733	-0.221521	-0.0347984	-0.00649014	-0.119831	1.496	-314
		1.49733	-233	1.49733	-186	1.49733	-200		1.49867	-0.227225	-0.0338629	-0.00632789	-0.116063	1.49733	-318
		1.49867	-239	1.49867	-181	1.49867	-195		1.5	-0.234831	-0.0321791	-0.00610073	-0.113802	1.49867	-308
		1.5	-247	1.5	-172	1.5	-188		1.50133	-0.239585	-0.03405	-0.00597093	-0.11757	1.5	-302
		1.50133	-252	1.50133	-182	1.50133	-184		1.50267	-0.230077	-0.0344242	-0.00597093	-0.114933	1.50133	-312
		1.50267	-242	1.50267	-184	1.50267	-184		1.504	-0.226274	-0.0342371	-0.00600338	-0.114933	1.50267	-305
		1.504	-238	1.504	-183	1.504	-185		1.50533	-0.227225	-0.0342371	-0.00603583	-0.11644	1.504	-305
		1.50533	-239	1.50533	-183	1.50533	-186		1.50667	-0.231028	-0.0353596	-0.00600338	-0.115309	1.50533	-309
		1.50667	-243	1.50667	-189	1.50667	-185		1.508	-0.23293	-0.03405	-0.00597093	-0.110787	1.50667	-306
		1.508	-245	1.508	-182	1.508	-184		1.50933	-0.23388	-0.0327404	-0.00616564	-0.112295	1.508	-294
		1.50933	-246	1.50933	-175	1.50933	-190		1.51067	-0.23388	-0.0338629	-0.00623054	-0.117194	1.50933	-298
		1.51067	-246	1.51067	-181	1.51067	-192		1.512	-0.234831	-0.036108	-0.00603583	-0.119078	1.51067	-311
		1.512	-247	1.512	-193	1.512	-186		1.51333	-0.228176	-0.0370434	-0.00593848	-0.118701	1.512	-316
		1.51333	-240	1.51333	-198	1.51333	-183		1.51467	-0.224373	-0.0372305	-0.00597093	-0.117947	1.51333	-315
		1.51467	-236	1.51467	-199	1.51467	-184		1.516	-0.225324	-0.0362951	-0.00606828	-0.117947	1.51467	-313
		1.516	-237	1.516	-194	1.516	-187		1.51733	-0.231028	-0.0372305	-0.00619809	-0.117947	1.516	-313
		1.51733	-243	1.51733	-199	1.51733	-191		1.51867	-0.242437	-0.036108	-0.00574378	-0.113425	1.51733	-313
		1.51867	-255	1.51867	-193	1.51867	-177		1.52	-0.239585	-0.0349854	-0.00584113	-0.112672	1.51867	-301
		1.52	-252	1.52	-187	1.52	-180		1.52133	-0.234831	-0.0372305	-0.00619809	-0.114933	1.52	-299
		1.52133	-247	1.52133	-199	1.52133	-191		1.52267	-0.239585	-0.036108	-0.00632789	-0.112672	1.52133	-305
		1.52267	-252	1.52267	-193	1.52267	-195		1.524	-0.224373	-0.0349854	-0.00606828	-0.114179	1.52267	-299
		1.524	-236	1.524	-187	1.524	-187		1.52533	-0.218669	-0.0344242	-0.00587358	-0.115686	1.524	-303
		1.52533	-230	1.52533	-184	1.52533	-181		1.52667	-0.223422	-0.0351725	-0.00580868	-0.114933	1.52533	-307
		1.52667	-235	1.52667	-188	1.52667	-179		1.528	-0.234831	-0.0346113	-0.00600338	-0.113048	1.52667	-305
		1.528	-247	1.528	-185	1.528	-185		1.52933	-0.236733	-0.0347984	-0.00597093	-0.114179	1.528	-300
		1.52933	-249	1.52933	-186	1.52933	-184		1.53067	-0.237683	-0.0357338	-0.00590603	-0.117194	1.52933	-303
		1.53067	-250	1.53067	-191	1.53067	-182		1.532	-0.240535	-0.0349854	-0.00597093	-0.122092	1.53067	-311
		1.532	-253	1.532	-187	1.532	-184		1.53333	-0.241486	-0.036108	-0.00610073	-0.11757	1.532	-324
		1.53333	-254	1.53333	-193	1.53333	-188		1.53467	-0.237683	-0.0372305	-0.00639279	-0.112672	1.53333	-312
		1.53467	-250	1.53467	-199	1.53467	-197		1.536	-0.23293	-0.0376047	-0.00636034	-0.109657	1.53467	-299
		1.536	-245	1.536	-201	1.536	-196		1.53733	-0.231028	-0.0372305	-0.00597093	-0.110411	1.536	-291
		1.53733	-243	1.53733	-199	1.53733	-184		1.53867	-0.238634	-0.0353596	-0.00606828	-0.11757	1.53733	-293
		1.53867	-251	1.53867	-189	1.53867	-187		1.54	-0.236733	-0.0346113	-0.00629544	-0.118324	1.53867	-312
		1.54	-249	1.54	-185	1.54	-194		1.54133	-0.235782	-0.0362951	-0.00636034	-0.115686	1.54	-314
		1.54133	-248	1.54133	-194	1.54133	-196		1.54267	-0.237683	-0.0346113	-0.00623054	-0.114556	1.54133	-307
		1.54267	-250	1.54267	-185	1.54267	-192		1.544	-0.23293	-0.0334887	-0.00639279	-0.117947	1.54267	-304
		1.544	-245	1.544	-179	1.544	-197		1.54533	-0.23388	-0.0329275	-0.00639279	-0.119078	1.544	-313
		1.54533	-246	1.54533	-176	1.54533	-197		1.54667	-0.234831	-0.0331146	-0.00639279	-0.117194	1.54533	-316
		1.54667	-247	1.54667	-177	1.54667	-197		1.548	-0.230077	-0.0344242	-0.00639279	-0.110411	1.54667	-311
		1.548	-242	1.548	-184	1.548	-197		1.54933	-0.226274	-0.0366692	-0.00632789	-0.110034	1.548	-293
		1.54933	-238	1.54933	-196	1.54933	-195		1.55067	-0.225324	-0.0379789	-0.00619809	-0.111164	1.54933	-292
		1.55067	-237	1.55067	-203	1.55067	-191		1.552	-0.226274	-0.0362951	-0.00610073	-0.112672	1.55067	-295
		1.552	-238	1.552	-194	1.552	-188		1.55333	-0.227225	-0.0344242	-0.00606828	-0.113048	1.552	-299
		1.55333	-239	1.55333	-184	1.55333	-187		1.55467	-0.223422	-0.0334887	-0.00674975	-0.117194	1.55333	-300
		1.55467	-235	1.55467	-179	1.55467	-208		1.556	-0.229127	-0.03405	-0.0069769	-0.118324	1.55467	-311
		1.556	-241	1.556	-182	1.556	-215		1.55733	-0.231979	-0.0374176	-0.0068471	-0.11644	1.556	-314
		1.55733	-244	1.55733	-200	1.55733	-211		1.55867	-0.223422	-0.0359209	-0.00668485	-0.119831	1.55733	-309
		1.55867	-235	1.55867	-192	1.55867	-206		1.56	-0.236733	-0.0357338	-0.0066524	-0.121339	1.55867	-318
		1.56	-249	1.56	-191	1.56	-205		1.56133	-0.239585	-0.0364821	-0.00661995	-0.120585	1.56	-322
		1.56133	-252	1.56133	-195	1.56133	-204		1.56267	-0.236733	-0.0355467	-0.0066524	-0.118324	1.56133	-320
		1.56267	-249	1.56267	-190	1.56267	-205		1.564	-0.236733	-0.0355467	-0.00661995	-0.117194	1.56267	-314
		1.564	-249	1.564	-190	1.564	-204		1.56533	-0.240535	-0.0355467	-0.00668485	-0.116817	1.564	-311
		1.56533	-253	1.56533	-190	1.56533	-206		1.56667	-0.23388	-0.0351725	-0.00674975	-0.114933	1.56533	-310
		1.56667	-246	1.56667	-188	1.56667	-208		1.568	-0.225324	-0.0359209	-0.0068471	-0.110787	1.56667	-305
		1.568	-237	1.568	-192	1.568	-211		1.56933	-0.23293	-0.036108	-0.0067822	-0.115686	1.568	-294
		1.56933	-245	1.56933	-193	1.56933	-209		1.57067	-0.231979	-0.036108	-0.00681465	-0.115309	1.56933	-307
		1.57067	-244	1.57067	-193	1.57067	-210		1.572	-0.225324	-0.0357338	-0.00674975	-0.113802	1.57067	-306
		1.572	-237	1.572	-191	1.572	-208		1.57333	-0.219619	-0.0353596	-0.00655504	-0.114933	1.572	-302
		1.57333	-231	1.57333	-189	1.57333	-202		1.57467	-0.230077	-0.0347984	-0.00639279	-0.11757	1.57333	-305
		1.57467	-242	1.57467	-186	1.57467	-197		1.576	-0.231979	-0.0346113	-0.00649014	-0.118701	1.57467	-312
		1.576	-244	1.576	-185	1.576	-200		1.57733	-0.229127	-0.0355467	-0.00655504	-0.11757	1.576	-315
		1.57733	-241	1.57733	-190	1.57733	-202		1.57867	-0.227225	-0.0366692	-0.00645769	-0.113802	1.57733	-312
		1.57867	-239	1.57867	-196	1.57867	-199		1.58	-0.230077	-0.0355467	-0.00652259	-0.113425	1.57867	-302
		1.58	-242	1.58	-190	1.58	-201		1.58133	-0.231028	-0.0342371	-0.00639279	-0.112295	1.58	-301
		1.58133	-243	1.58133	-183	1.58133	-197		1.58267	-0.231979	-0.0351725	-0.00632789	-0.112295	1.58133	-298
		1.58267	-244	1.58267	-188	1.58267	-195		1.584	-0.234831	-0.0353596	-0.00649014	-0.119078	1.58267	-298
		1.584	-247	1.584	-189	1.584	-200		1.58533	-0.222472	-0.0370434	-0.00655504	-0.114933	1.584	-316
		1.58533	-234	1.58533	-198	1.58533	-202		1.58667	-0.229127	-0.0385401	-0.0065875	-0.115309	1.58533	-305
		1.58667	-241	1.58667	-206	1.58667	-203		1.588	-0.235782	-0.0377918	-0.00649014	-0.119455	1.58667	-306
		1.588	-248	1.588	-202	1.588	-200		1.58933	-0.226274	-0.0379789	-0.00619809	-0.119831	1.588	-317
		1.58933	-238	1.58933	-203	1.58933	-191		1.59067	-0.225324	-0.0389143	-0.00629544	-0.11757	1.58933	-318
		1.59067	-237	1.59067	-208	1.59067	-194		1.592	-0.227225	-0.0391014	-0.00645769	-0.117194	1.59067	-312
		1.592	-239	1.592	-209	1.592	-199		1.59333	-0.231028	-0.0377918	-0.00652259	-0.119455	1.592	-311
		1.59333	-243	1.59333	-202	1.59333	-201		1.59467	-0.237683	-0.036108	-0.00642524	-0.125484	1.59333	-317
		1.59467	-250	1.59467	-193	1.59467	-198		1.596	-0.235782	-0.036108	-0.0065875	-0.122846	1.59467	-333
		1.596	-248	1.596	-193	1.596	-203		1.59733	-0.231979	-0.0368563	-0.0067173	-0.119831	1.596	-326
		1.59733	-244	1.59733	-197	1.59733	-207		1.59867	-0.228176	-0.0362951	-0.0067822	-0.119455	1.59733	-318
		1.59867	-240	1.59867	-194	1.59867	-209		1.6	-0.226274	-0.0357338	-0.00687955	-0.117947	1.59867	-317
		1.6	-238	1.6	-191	1.6	-212		1.60133	-0.221521	-0.0362951	-0.00655504	-0.11644	1.6	-313
		1.60133	-233	1.60133	-194	1.60133	-202		1.60267	-0.227225	-0.0377918	-0.00645769	-0.119455	1.60133	-309
		1.60267	-239	1.60267	-202	1.60267	-199		1.604	-0.236733	-0.0376047	-0.00661995	-0.128122	1.60267	-317
		1.604	-249	1.604	-201	1.604	-204		1.60533	-0.236733	-0.0372305	-0.00636034	-0.121715	1.604	-340
		1.60533	-249	1.60533	-199	1.60533	-196		1.60667	-0.235782	-0.0376047	-0.00639279	-0.122092	1.60533	-323
		1.60667	-248	1.60667	-201	1.60667	-197		1.608	-0.230077	-0.0387272	-0.00661995	-0.12473	1.60667	-324
		1.608	-242	1.608	-207	1.608	-204		1.60933	-0.222472	-0.0381659	-0.00694445	-0.125861	1.608	-331
		1.60933	-234	1.60933	-204	1.60933	-214		1.61067	-0.222472	-0.0374176	-0.0068471	-0.125861	1.60933	-334
		1.61067	-234	1.61067	-200	1.61067	-211		1.612	-0.222472	-0.0372305	-0.00707426	-0.124353	1.61067	-334
		1.612	-234	1.612	-199	1.612	-218		1.61333	-0.222472	-0.0385401	-0.00710671	-0.123976	1.612	-330
		1.61333	-234	1.61333	-206	1.61333	-219		1.61467	-0.222472	-0.0420948	-0.00674975	-0.125861	1.61333	-329
		1.61467	-234	1.61467	-225	1.61467	-208		1.616	-0.228176	-0.0409723	-0.0066524	-0.128498	1.61467	-334
		1.616	-240	1.616	-219	1.616	-205		1.61733	-0.227225	-0.038353	-0.0065875	-0.130759	1.616	-341
		1.61733	-239	1.61733	-205	1.61733	-203		1.61867	-0.222472	-0.0374176	-0.0065875	-0.131136	1.61733	-347
		1.61867	-234	1.61867	-200	1.61867	-203		1.62	-0.219619	-0.0372305	-0.00674975	-0.126991	1.61867	-348
		1.62	-231	1.62	-199	1.62	-208		1.62133	-0.218669	-0.0368563	-0.00694445	-0.128875	1.62	-337
		1.62133	-230	1.62133	-197	1.62133	-214		1.62267	-0.221521	-0.0366692	-0.00687955	-0.128122	1.62133	-342
		1.62267	-233	1.62267	-196	1.62267	-212		1.624	-0.227225	-0.0364821	-0.00674975	-0.125107	1.62267	-340
		1.624	-239	1.624	-195	1.624	-208		1.62533	-0.236733	-0.0374176	-0.0068471	-0.125861	1.624	-332
		1.62533	-249	1.62533	-200	1.62533	-211		1.62667	-0.249092	-0.0377918	-0.00700935	-0.129629	1.62533	-334
		1.62667	-262	1.62667	-202	1.62667	-216		1.628	-0.250043	-0.0379789	-0.00710671	-0.131513	1.62667	-344
		1.628	-263	1.628	-203	1.628	-219		1.62933	-0.244338	-0.0379789	-0.00707426	-0.132267	1.628	-349
		1.62933	-257	1.62933	-203	1.62933	-218		1.63067	-0.236733	-0.0398497	-0.00681465	-0.136412	1.62933	-351
		1.63067	-249	1.63067	-213	1.63067	-210		1.632	-0.238634	-0.040411	-0.0067822	-0.13189	1.63067	-362
		1.632	-251	1.632	-216	1.632	-209		1.63333	-0.236733	-0.0394756	-0.0067173	-0.128498	1.632	-350
		1.63333	-249	1.63333	-211	1.63333	-207		1.63467	-0.231028	-0.0379789	-0.0066524	-0.127368	1.63333	-341
		1.63467	-243	1.63467	-203	1.63467	-205		1.636	-0.227225	-0.0370434	-0.00694445	-0.122469	1.63467	-338
		1.636	-239	1.636	-198	1.636	-214		1.63733	-0.241486	-0.0370434	-0.0067173	-0.125484	1.636	-325
		1.63733	-254	1.63733	-198	1.63733	-207		1.63867	-0.248141	-0.0374176	-0.00652259	-0.130383	1.63733	-333
		1.63867	-261	1.63867	-200	1.63867	-201		1.64	-0.249092	-0.0351725	-0.00649014	-0.133397	1.63867	-346
		1.64	-262	1.64	-188	1.64	-200		1.64133	-0.253846	-0.038353	-0.00655504	-0.13189	1.64	-354
		1.64133	-267	1.64133	-205	1.64133	-202		1.64267	-0.249092	-0.0407852	-0.00694445	-0.131136	1.64133	-350
		1.64267	-262	1.64267	-218	1.64267	-214		1.644	-0.247191	-0.0405981	-0.00707426	-0.131513	1.64267	-348
		1.644	-260	1.644	-217	1.644	-218		1.64533	-0.249092	-0.0377918	-0.0068471	-0.132267	1.644	-349
		1.64533	-262	1.64533	-202	1.64533	-211		1.64667	-0.243388	-0.038353	-0.0067822	-0.125484	1.64533	-351
		1.64667	-256	1.64667	-205	1.64667	-209		1.648	-0.241486	-0.0398497	-0.00687955	-0.124353	1.64667	-333
		1.648	-254	1.648	-213	1.648	-212		1.64933	-0.243388	-0.0407852	-0.0067822	-0.127745	1.648	-330
		1.64933	-256	1.64933	-218	1.64933	-209		1.65067	-0.245289	-0.0400368	-0.00642524	-0.13302	1.64933	-339
		1.65067	-258	1.65067	-214	1.65067	-198		1.652	-0.23388	-0.0402239	-0.00668485	-0.13189	1.65067	-353
		1.652	-246	1.652	-215	1.652	-206		1.65333	-0.230077	-0.0407852	-0.00687955	-0.13302	1.652	-350
		1.65333	-242	1.65333	-218	1.65333	-212		1.65467	-0.228176	-0.0409723	-0.00687955	-0.134151	1.65333	-353
		1.65467	-240	1.65467	-219	1.65467	-212		1.656	-0.223422	-0.0394756	-0.0067173	-0.130383	1.65467	-356
		1.656	-235	1.656	-211	1.656	-207		1.65733	-0.228176	-0.0379789	-0.00713916	-0.13302	1.656	-346
		1.65733	-240	1.65733	-203	1.65733	-220		1.65867	-0.241486	-0.0376047	-0.00736631	-0.133774	1.65733	-353
		1.65867	-254	1.65867	-201	1.65867	-227		1.66	-0.248141	-0.040411	-0.00720406	-0.13189	1.65867	-355
		1.66	-261	1.66	-216	1.66	-222		1.66133	-0.244338	-0.0413464	-0.00652259	-0.128875	1.66	-350
		1.66133	-257	1.66133	-221	1.66133	-201		1.66267	-0.249092	-0.0405981	-0.00655504	-0.13189	1.66133	-342
		1.66267	-262	1.66267	-217	1.66267	-202		1.664	-0.250043	-0.0394756	-0.00674975	-0.134528	1.66267	-350
		1.664	-263	1.664	-211	1.664	-208		1.66533	-0.248141	-0.0398497	-0.0068471	-0.134904	1.664	-357
		1.66533	-261	1.66533	-213	1.66533	-211		1.66667	-0.24624	-0.0389143	-0.00674975	-0.130759	1.66533	-358
		1.66667	-259	1.66667	-208	1.66667	-208		1.668	-0.239585	-0.0381659	-0.0067173	-0.130006	1.66667	-347
		1.668	-252	1.668	-204	1.668	-207		1.66933	-0.231979	-0.0381659	-0.0067173	-0.129252	1.668	-345
		1.66933	-244	1.66933	-204	1.66933	-207		1.67067	-0.230077	-0.040411	-0.0067822	-0.128122	1.66933	-343
		1.67067	-242	1.67067	-216	1.67067	-209		1.672	-0.245289	-0.0411593	-0.00687955	-0.13302	1.67067	-340
		1.672	-258	1.672	-220	1.672	-212		1.67333	-0.256698	-0.0407852	-0.00649014	-0.134904	1.672	-353
		1.67333	-270	1.67333	-218	1.67333	-200		1.67467	-0.253846	-0.0396626	-0.00636034	-0.136789	1.67333	-358
		1.67467	-267	1.67467	-212	1.67467	-196		1.676	-0.24624	-0.038353	-0.00655504	-0.139803	1.67467	-363
		1.676	-259	1.676	-205	1.676	-202		1.67733	-0.251944	-0.0394756	-0.00652259	-0.138296	1.676	-371
		1.67733	-265	1.67733	-211	1.67733	-201		1.67867	-0.24624	-0.0398497	-0.0066524	-0.136412	1.67733	-367
		1.67867	-259	1.67867	-213	1.67867	-205		1.68	-0.240535	-0.0385401	-0.0065875	-0.136035	1.67867	-362
		1.68	-253	1.68	-206	1.68	-203		1.68133	-0.234831	-0.0387272	-0.00642524	-0.138296	1.68	-361
		1.68133	-247	1.68133	-207	1.68133	-198		1.68267	-0.231979	-0.0374176	-0.00704181	-0.134528	1.68133	-367
		1.68267	-244	1.68267	-200	1.68267	-217		1.684	-0.237683	-0.0372305	-0.00710671	-0.133397	1.68267	-357
		1.684	-250	1.684	-199	1.684	-219		1.68533	-0.242437	-0.0391014	-0.0069769	-0.133774	1.684	-354
		1.68533	-255	1.68533	-209	1.68533	-215		1.68667	-0.243388	-0.0376047	-0.00681465	-0.13302	1.68533	-355
		1.68667	-256	1.68667	-201	1.68667	-210		1.688	-0.245289	-0.0376047	-0.0067822	-0.13189	1.68667	-353
		1.688	-258	1.688	-201	1.688	-209		1.68933	-0.24624	-0.0379789	-0.0067173	-0.132267	1.688	-350
		1.68933	-259	1.68933	-203	1.68933	-207		1.69067	-0.247191	-0.0370434	-0.00668485	-0.134528	1.68933	-351
		1.69067	-260	1.69067	-198	1.69067	-206		1.692	-0.248141	-0.0364821	-0.0067173	-0.138296	1.69067	-357
		1.692	-261	1.692	-195	1.692	-207		1.69333	-0.23388	-0.038353	-0.00700935	-0.137165	1.692	-367
		1.69333	-246	1.69333	-205	1.69333	-216		1.69467	-0.231979	-0.0400368	-0.00674975	-0.134904	1.69333	-364
		1.69467	-244	1.69467	-214	1.69467	-208		1.696	-0.235782	-0.0389143	-0.00642524	-0.132643	1.69467	-358
		1.696	-248	1.696	-208	1.696	-198		1.69733	-0.242437	-0.0402239	-0.0065875	-0.13189	1.696	-352
		1.69733	-255	1.69733	-215	1.69733	-203		1.69867	-0.251944	-0.0389143	-0.00668485	-0.13189	1.69733	-350
		1.69867	-265	1.69867	-208	1.69867	-206		1.7	-0.242437	-0.0368563	-0.0067173	-0.13302	1.69867	-350
		1.7	-255	1.7	-197	1.7	-207		1.70133	-0.230077	-0.0379789	-0.0067822	-0.134904	1.7	-353
		1.70133	-242	1.70133	-203	1.70133	-209		1.70267	-0.23388	-0.0385401	-0.00720406	-0.134904	1.70133	-358
		1.70267	-246	1.70267	-206	1.70267	-222		1.704	-0.236733	-0.0385401	-0.00681465	-0.134904	1.70267	-358
		1.704	-249	1.704	-206	1.704	-210		1.70533	-0.236733	-0.038353	-0.00642524	-0.135658	1.704	-358
		1.70533	-249	1.70533	-205	1.70533	-198		1.70667	-0.236733	-0.0381659	-0.00626299	-0.136789	1.70533	-360
		1.70667	-249	1.70667	-204	1.70667	-193		1.708	-0.237683	-0.0391014	-0.0066524	-0.13302	1.70667	-363
		1.708	-250	1.708	-209	1.708	-205		1.70933	-0.245289	-0.040411	-0.0067822	-0.133397	1.708	-353
		1.70933	-258	1.70933	-216	1.70933	-209		1.71067	-0.251944	-0.0417206	-0.00668485	-0.134151	1.70933	-354
		1.71067	-265	1.71067	-223	1.71067	-206		1.712	-0.253846	-0.0405981	-0.00642524	-0.133397	1.71067	-356
		1.712	-267	1.712	-217	1.712	-198		1.71333	-0.247191	-0.038353	-0.00636034	-0.132267	1.712	-354
		1.71333	-260	1.71333	-205	1.71333	-196		1.71467	-0.262402	-0.0372305	-0.00629544	-0.134904	1.71333	-351
		1.71467	-276	1.71467	-199	1.71467	-194		1.716	-0.268107	-0.0376047	-0.00645769	-0.13905	1.71467	-358
		1.716	-282	1.716	-201	1.716	-199		1.71733	-0.260501	-0.0394756	-0.006912	-0.142818	1.716	-369
		1.71733	-274	1.71733	-211	1.71733	-213		1.71867	-0.251944	-0.0385401	-0.0067173	-0.13302	1.71733	-379
		1.71867	-265	1.71867	-206	1.71867	-207		1.72	-0.244338	-0.0377918	-0.00649014	-0.133397	1.71867	-353
		1.72	-257	1.72	-202	1.72	-200		1.72133	-0.247191	-0.038353	-0.00645769	-0.137542	1.72	-354
		1.72133	-260	1.72133	-205	1.72133	-199		1.72267	-0.25955	-0.0385401	-0.00668485	-0.137542	1.72133	-365
		1.72267	-273	1.72267	-206	1.72267	-206		1.724	-0.24624	-0.0392885	-0.00649014	-0.137919	1.72267	-365
		1.724	-259	1.724	-210	1.724	-200		1.72533	-0.257649	-0.0405981	-0.0067173	-0.138296	1.724	-366
		1.72533	-271	1.72533	-217	1.72533	-207		1.72667	-0.265255	-0.0426561	-0.0067173	-0.137542	1.72533	-367
		1.72667	-279	1.72667	-228	1.72667	-207		1.728	-0.252895	-0.0449011	-0.00606828	-0.133397	1.72667	-365
		1.728	-266	1.728	-240	1.728	-187		1.72933	-0.256698	-0.0422819	-0.00639279	-0.13905	1.728	-354
		1.72933	-270	1.72933	-226	1.72933	-197		1.73067	-0.254796	-0.0389143	-0.00629544	-0.140557	1.72933	-369
		1.73067	-268	1.73067	-208	1.73067	-194		1.732	-0.250043	-0.0394756	-0.00606828	-0.138673	1.73067	-373
		1.732	-263	1.732	-211	1.732	-187		1.73333	-0.24624	-0.040411	-0.00613319	-0.139803	1.732	-368
		1.73333	-259	1.73333	-216	1.73333	-189		1.73467	-0.249092	-0.0402239	-0.00636034	-0.141311	1.73333	-371
		1.73467	-262	1.73467	-215	1.73467	-196		1.736	-0.245289	-0.040411	-0.00639279	-0.142441	1.73467	-375
		1.736	-258	1.736	-216	1.736	-197		1.73733	-0.238634	-0.0428431	-0.00632789	-0.143195	1.736	-378
		1.73733	-251	1.73733	-229	1.73733	-195		1.73867	-0.237683	-0.0413464	-0.00636034	-0.141311	1.73733	-380
		1.73867	-250	1.73867	-221	1.73867	-196		1.74	-0.237683	-0.0400368	-0.00655504	-0.143195	1.73867	-375
		1.74	-250	1.74	-214	1.74	-202		1.74133	-0.243388	-0.0392885	-0.00642524	-0.144325	1.74	-380
		1.74133	-256	1.74133	-210	1.74133	-198		1.74267	-0.252895	-0.0385401	-0.00613319	-0.143195	1.74133	-383
		1.74267	-266	1.74267	-206	1.74267	-189		1.744	-0.266205	-0.0389143	-0.00629544	-0.142064	1.74267	-380
		1.744	-280	1.744	-208	1.744	-194		1.74533	-0.260501	-0.0389143	-0.00661995	-0.140557	1.744	-377
		1.74533	-274	1.74533	-208	1.74533	-204		1.74667	-0.254796	-0.038353	-0.0067822	-0.140934	1.74533	-373
		1.74667	-268	1.74667	-205	1.74667	-209		1.748	-0.250994	-0.0396626	-0.00681465	-0.144702	1.74667	-374
		1.748	-264	1.748	-212	1.748	-210		1.74933	-0.244338	-0.040411	-0.00704181	-0.142441	1.748	-384
		1.74933	-257	1.74933	-216	1.74933	-217		1.75067	-0.245289	-0.040411	-0.0067822	-0.140934	1.74933	-378
		1.75067	-258	1.75067	-216	1.75067	-209		1.752	-0.248141	-0.0398497	-0.0067822	-0.140557	1.75067	-374
		1.752	-261	1.752	-213	1.752	-209		1.75333	-0.250994	-0.0398497	-0.00713916	-0.140934	1.752	-373
		1.75333	-264	1.75333	-213	1.75333	-220		1.75467	-0.25955	-0.0419077	-0.00687955	-0.146963	1.75333	-374
		1.75467	-273	1.75467	-224	1.75467	-212		1.756	-0.254796	-0.0428431	-0.00668485	-0.148093	1.75467	-390
		1.756	-268	1.756	-229	1.756	-206		1.75733	-0.248141	-0.0405981	-0.00649014	-0.146586	1.756	-393
		1.75733	-261	1.75733	-217	1.75733	-200		1.75867	-0.245289	-0.0392885	-0.00623054	-0.145832	1.75733	-389
		1.75867	-258	1.75867	-210	1.75867	-192		1.76	-0.256698	-0.0394756	-0.00632789	-0.142441	1.75867	-387
		1.76	-270	1.76	-211	1.76	-195		1.76133	-0.260501	-0.0409723	-0.00645769	-0.145079	1.76	-378
		1.76133	-274	1.76133	-219	1.76133	-199		1.76267	-0.255747	-0.0432173	-0.00661995	-0.150354	1.76133	-385
		1.76267	-269	1.76267	-231	1.76267	-204		1.764	-0.243388	-0.0415335	-0.00687955	-0.150354	1.76267	-399
		1.764	-256	1.764	-222	1.764	-212		1.76533	-0.256698	-0.0407852	-0.0067173	-0.145832	1.764	-399
		1.76533	-270	1.76533	-218	1.76533	-207		1.76667	-0.251944	-0.0411593	-0.00655504	-0.143572	1.76533	-387
		1.76667	-265	1.76667	-220	1.76667	-202		1.768	-0.243388	-0.0422819	-0.00668485	-0.143572	1.76667	-381
		1.768	-256	1.768	-226	1.768	-206		1.76933	-0.245289	-0.0413464	-0.00736631	-0.142441	1.768	-381
		1.76933	-258	1.76933	-221	1.76933	-227		1.77067	-0.256698	-0.042469	-0.0069769	-0.145456	1.76933	-378
		1.77067	-270	1.77067	-227	1.77067	-215		1.772	-0.257649	-0.0441528	-0.00652259	-0.146586	1.77067	-386
		1.772	-271	1.772	-236	1.772	-201		1.77333	-0.254796	-0.0439657	-0.00632789	-0.146209	1.772	-389
		1.77333	-268	1.77333	-235	1.77333	-195		1.77467	-0.261452	-0.0420948	-0.00674975	-0.144325	1.77333	-388
		1.77467	-275	1.77467	-225	1.77467	-208		1.776	-0.264304	-0.0415335	-0.0067173	-0.145456	1.77467	-383
		1.776	-278	1.776	-222	1.776	-207		1.77733	-0.258599	-0.0419077	-0.0065875	-0.146963	1.776	-386
		1.77733	-272	1.77733	-224	1.77733	-203		1.77867	-0.252895	-0.0419077	-0.00649014	-0.14847	1.77733	-390
		1.77867	-266	1.77867	-224	1.77867	-200		1.78	-0.264304	-0.0441528	-0.00661995	-0.151485	1.77867	-394
		1.78	-278	1.78	-236	1.78	-204		1.78133	-0.268107	-0.0435915	-0.0067173	-0.152239	1.78	-402
		1.78133	-282	1.78133	-233	1.78133	-207		1.78267	-0.264304	-0.0405981	-0.00668485	-0.151862	1.78133	-404
		1.78267	-278	1.78267	-217	1.78267	-206		1.784	-0.258599	-0.0422819	-0.00652259	-0.151485	1.78267	-403
		1.784	-272	1.784	-226	1.784	-201		1.78533	-0.263353	-0.0422819	-0.00652259	-0.151862	1.784	-402
		1.78533	-277	1.78533	-226	1.78533	-201		1.78667	-0.250994	-0.0428431	-0.00619809	-0.152615	1.78533	-403
		1.78667	-264	1.78667	-229	1.78667	-191		1.788	-0.250994	-0.0445269	-0.00623054	-0.152992	1.78667	-405
		1.788	-264	1.788	-238	1.788	-192		1.78933	-0.264304	-0.0434044	-0.0066524	-0.152615	1.788	-406
		1.78933	-278	1.78933	-232	1.78933	-205		1.79067	-0.270008	-0.042469	-0.0065875	-0.153746	1.78933	-405
		1.79067	-284	1.79067	-227	1.79067	-203		1.792	-0.268107	-0.0430302	-0.00687955	-0.154876	1.79067	-408
		1.792	-282	1.792	-230	1.792	-212		1.79333	-0.266205	-0.0454624	-0.00704181	-0.15563	1.792	-411
		1.79333	-280	1.79333	-243	1.79333	-217		1.79467	-0.265255	-0.0430302	-0.0067822	-0.156384	1.79333	-413
		1.79467	-279	1.79467	-230	1.79467	-209		1.796	-0.25955	-0.0413464	-0.00687955	-0.152239	1.79467	-415
		1.796	-273	1.796	-221	1.796	-212		1.79733	-0.267156	-0.0409723	-0.00713916	-0.154123	1.796	-404
		1.79733	-281	1.79733	-219	1.79733	-220		1.79867	-0.27191	-0.0415335	-0.00730141	-0.157514	1.79733	-409
		1.79867	-286	1.79867	-222	1.79867	-225		1.8	-0.266205	-0.0432173	-0.00726896	-0.152992	1.79867	-418
		1.8	-280	1.8	-231	1.8	-224		1.80133	-0.269057	-0.0420948	-0.00707426	-0.149601	1.8	-406
		1.80133	-283	1.80133	-225	1.80133	-218		1.80267	-0.270008	-0.0405981	-0.00717161	-0.146963	1.80133	-397
		1.80267	-284	1.80267	-217	1.80267	-221		1.804	-0.269057	-0.0411593	-0.00713916	-0.144702	1.80267	-390
		1.804	-283	1.804	-220	1.804	-220		1.80533	-0.266205	-0.0394756	-0.00661995	-0.146209	1.804	-384
		1.80533	-280	1.80533	-211	1.80533	-204		1.80667	-0.268107	-0.0398497	-0.00694445	-0.148847	1.80533	-388
		1.80667	-282	1.80667	-213	1.80667	-214		1.808	-0.269057	-0.0415335	-0.00704181	-0.152239	1.80667	-395
		1.808	-283	1.808	-222	1.808	-217		1.80933	-0.270008	-0.0430302	-0.006912	-0.154876	1.808	-404
		1.80933	-284	1.80933	-230	1.80933	-213		1.81067	-0.27191	-0.044714	-0.00674975	-0.152615	1.80933	-411
		1.81067	-286	1.81067	-239	1.81067	-208		1.812	-0.282368	-0.0434044	-0.00694445	-0.150731	1.81067	-405
		1.812	-297	1.812	-232	1.812	-214		1.81333	-0.284269	-0.0411593	-0.00687955	-0.150731	1.812	-400
		1.81333	-299	1.81333	-220	1.81333	-212		1.81467	-0.279516	-0.0439657	-0.0066524	-0.152615	1.81333	-400
		1.81467	-294	1.81467	-235	1.81467	-205		1.816	-0.269057	-0.0441528	-0.006912	-0.151862	1.81467	-405
		1.816	-283	1.816	-236	1.816	-213		1.81733	-0.266205	-0.0443398	-0.00710671	-0.157514	1.816	-403
		1.81733	-280	1.81733	-237	1.81733	-219		1.81867	-0.267156	-0.0452753	-0.00723651	-0.160152	1.81733	-418
		1.81867	-281	1.81867	-242	1.81867	-223		1.82	-0.267156	-0.0439657	-0.00736631	-0.15563	1.81867	-425
		1.82	-281	1.82	-235	1.82	-227		1.82133	-0.263353	-0.0439657	-0.00717161	-0.154876	1.82	-413
		1.82133	-277	1.82133	-235	1.82133	-221		1.82267	-0.25955	-0.0432173	-0.00713916	-0.153746	1.82133	-411
		1.82267	-273	1.82267	-231	1.82267	-220		1.824	-0.262402	-0.0419077	-0.00710671	-0.153746	1.82267	-408
		1.824	-276	1.824	-224	1.824	-219		1.82533	-0.27286	-0.0454624	-0.00694445	-0.156384	1.824	-408
		1.82533	-287	1.82533	-243	1.82533	-214		1.82667	-0.279516	-0.0450882	-0.00710671	-0.15563	1.82533	-415
		1.82667	-294	1.82667	-241	1.82667	-219		1.828	-0.273811	-0.0441528	-0.00717161	-0.158645	1.82667	-413
		1.828	-288	1.828	-236	1.828	-221		1.82933	-0.270959	-0.0449011	-0.00723651	-0.160906	1.828	-421
		1.82933	-285	1.82933	-240	1.82933	-223		1.83067	-0.275713	-0.0420948	-0.00739876	-0.157137	1.82933	-427
		1.83067	-290	1.83067	-225	1.83067	-228		1.832	-0.278565	-0.0405981	-0.00733386	-0.156384	1.83067	-417
		1.832	-293	1.832	-217	1.832	-226		1.83333	-0.278565	-0.0415335	-0.00723651	-0.154876	1.832	-415
		1.83333	-293	1.83333	-222	1.83333	-223		1.83467	-0.278565	-0.0450882	-0.00717161	-0.154123	1.83333	-411
		1.83467	-293	1.83467	-241	1.83467	-221		1.836	-0.278565	-0.0411593	-0.00730141	-0.158645	1.83467	-409
		1.836	-293	1.836	-220	1.836	-225		1.83733	-0.274762	-0.0405981	-0.00707426	-0.1545	1.836	-421
		1.83733	-289	1.83733	-217	1.83733	-218		1.83867	-0.277614	-0.0426561	-0.00707426	-0.153369	1.83733	-410
		1.83867	-292	1.83867	-228	1.83867	-218		1.84	-0.279516	-0.0460236	-0.00720406	-0.156007	1.83867	-407
		1.84	-294	1.84	-246	1.84	-222		1.84133	-0.275713	-0.0449011	-0.00730141	-0.160529	1.84	-414
		1.84133	-290	1.84133	-240	1.84133	-225		1.84267	-0.284269	-0.0449011	-0.00733386	-0.160906	1.84133	-426
		1.84267	-299	1.84267	-240	1.84267	-226		1.844	-0.289974	-0.0456495	-0.00720406	-0.159021	1.84267	-427
		1.844	-305	1.844	-244	1.844	-222		1.84533	-0.289023	-0.0456495	-0.00694445	-0.157514	1.844	-422
		1.84533	-304	1.84533	-244	1.84533	-214		1.84667	-0.276663	-0.0435915	-0.00694445	-0.159021	1.84533	-418
		1.84667	-291	1.84667	-233	1.84667	-214		1.848	-0.279516	-0.0415335	-0.00720406	-0.157137	1.84667	-422
		1.848	-294	1.848	-222	1.848	-222		1.84933	-0.277614	-0.0405981	-0.00713916	-0.154123	1.848	-417
		1.84933	-292	1.84933	-217	1.84933	-220		1.85067	-0.27286	-0.0441528	-0.0067822	-0.151485	1.84933	-409
		1.85067	-287	1.85067	-236	1.85067	-209		1.852	-0.270008	-0.0422819	-0.00649014	-0.157137	1.85067	-402
		1.852	-284	1.852	-226	1.852	-200		1.85333	-0.280466	-0.0411593	-0.0067173	-0.15676	1.852	-417
		1.85333	-295	1.85333	-220	1.85333	-207		1.85467	-0.287121	-0.0419077	-0.00694445	-0.1545	1.85333	-416
		1.85467	-302	1.85467	-224	1.85467	-214		1.856	-0.288072	-0.042469	-0.00710671	-0.153746	1.85467	-410
		1.856	-303	1.856	-227	1.856	-219		1.85733	-0.28522	-0.0428431	-0.00746366	-0.160152	1.856	-408
		1.85733	-300	1.85733	-229	1.85733	-230		1.85867	-0.289974	-0.0420948	-0.00756102	-0.160906	1.85733	-425
		1.85867	-305	1.85867	-225	1.85867	-233		1.86	-0.289023	-0.0402239	-0.00756102	-0.158268	1.85867	-427
		1.86	-304	1.86	-215	1.86	-233		1.86133	-0.282368	-0.0413464	-0.00752857	-0.156384	1.86	-420
		1.86133	-297	1.86133	-221	1.86133	-232		1.86267	-0.282368	-0.0417206	-0.00720406	-0.158645	1.86133	-415
		1.86267	-297	1.86267	-223	1.86267	-222		1.864	-0.276663	-0.0415335	-0.00704181	-0.157514	1.86267	-421
		1.864	-291	1.864	-222	1.864	-217		1.86533	-0.274762	-0.0411593	-0.00720406	-0.154876	1.864	-418
		1.86533	-289	1.86533	-220	1.86533	-222		1.86667	-0.277614	-0.0415335	-0.00762592	-0.152239	1.86533	-411
		1.86667	-292	1.86667	-222	1.86667	-235		1.868	-0.278565	-0.0417206	-0.00759347	-0.152992	1.86667	-404
		1.868	-293	1.868	-223	1.868	-234		1.86933	-0.281417	-0.0419077	-0.00752857	-0.152615	1.868	-406
		1.86933	-296	1.86933	-224	1.86933	-232		1.87067	-0.283318	-0.0422819	-0.00749612	-0.150731	1.86933	-405
		1.87067	-298	1.87067	-226	1.87067	-231		1.872	-0.280466	-0.0443398	-0.00739876	-0.150731	1.87067	-400
		1.872	-295	1.872	-237	1.872	-228		1.87333	-0.284269	-0.0435915	-0.00749612	-0.154123	1.872	-400
		1.87333	-299	1.87333	-233	1.87333	-231		1.87467	-0.283318	-0.0420948	-0.00752857	-0.152992	1.87333	-409
		1.87467	-298	1.87467	-225	1.87467	-232		1.876	-0.282368	-0.0428431	-0.00736631	-0.149224	1.87467	-406
		1.876	-297	1.876	-229	1.876	-227		1.87733	-0.289023	-0.0445269	-0.00694445	-0.14734	1.876	-396
		1.87733	-304	1.87733	-238	1.87733	-214		1.87867	-0.289974	-0.0450882	-0.00710671	-0.149224	1.87733	-391
		1.87867	-305	1.87867	-241	1.87867	-219		1.88	-0.28522	-0.0445269	-0.00726896	-0.151108	1.87867	-396
		1.88	-300	1.88	-238	1.88	-224		1.88133	-0.278565	-0.0435915	-0.00743121	-0.152992	1.88	-401
		1.88133	-293	1.88133	-233	1.88133	-229		1.88267	-0.277614	-0.0449011	-0.00749612	-0.15676	1.88133	-406
		1.88267	-292	1.88267	-240	1.88267	-231		1.884	-0.288072	-0.0449011	-0.00736631	-0.158268	1.88267	-416
		1.884	-303	1.884	-240	1.884	-227		1.88533	-0.290924	-0.0437786	-0.00743121	-0.159021	1.884	-420
		1.88533	-306	1.88533	-234	1.88533	-229		1.88667	-0.289023	-0.0439657	-0.00759347	-0.160152	1.88533	-422
		1.88667	-304	1.88667	-235	1.88667	-234		1.888	-0.286171	-0.046772	-0.00733386	-0.160152	1.88667	-425
		1.888	-301	1.888	-250	1.888	-226		1.88933	-0.277614	-0.0475203	-0.00720406	-0.157514	1.888	-425
		1.88933	-292	1.88933	-254	1.88933	-222		1.89067	-0.275713	-0.0460236	-0.00704181	-0.156384	1.88933	-418
		1.89067	-290	1.89067	-246	1.89067	-217		1.892	-0.281417	-0.0454624	-0.006912	-0.157891	1.89067	-415
		1.892	-296	1.892	-243	1.892	-213		1.89333	-0.289974	-0.0439657	-0.00713916	-0.153746	1.892	-419
		1.89333	-305	1.89333	-235	1.89333	-220		1.89467	-0.297579	-0.0432173	-0.00717161	-0.153369	1.89333	-408
		1.89467	-313	1.89467	-231	1.89467	-221		1.896	-0.299481	-0.0437786	-0.00720406	-0.154876	1.89467	-407
		1.896	-315	1.896	-234	1.896	-222		1.89733	-0.296629	-0.0462107	-0.00730141	-0.15563	1.896	-411
		1.89733	-312	1.89733	-247	1.89733	-225		1.89867	-0.287121	-0.0465849	-0.00739876	-0.153746	1.89733	-413
		1.89867	-302	1.89867	-249	1.89867	-228		1.9	-0.289023	-0.0456495	-0.00746366	-0.151862	1.89867	-408
		1.9	-304	1.9	-244	1.9	-230		1.90133	-0.289974	-0.0435915	-0.00749612	-0.150731	1.9	-403
		1.90133	-305	1.90133	-233	1.90133	-231		1.90267	-0.289023	-0.044714	-0.00749612	-0.149224	1.90133	-400
		1.90267	-304	1.90267	-239	1.90267	-231		1.904	-0.29853	-0.0452753	-0.00769082	-0.149601	1.90267	-396
		1.904	-314	1.904	-242	1.904	-237		1.90533	-0.299481	-0.0460236	-0.00762592	-0.150731	1.904	-397
		1.90533	-315	1.90533	-246	1.90533	-235		1.90667	-0.294727	-0.0475203	-0.00743121	-0.152239	1.90533	-400
		1.90667	-310	1.90667	-254	1.90667	-229		1.908	-0.289023	-0.044714	-0.00730141	-0.152615	1.90667	-404
		1.908	-304	1.908	-239	1.908	-225		1.90933	-0.293777	-0.0432173	-0.00700935	-0.153369	1.908	-405
		1.90933	-309	1.90933	-231	1.90933	-216		1.91067	-0.291875	-0.0426561	-0.00723651	-0.151862	1.90933	-407
		1.91067	-307	1.91067	-228	1.91067	-223		1.912	-0.287121	-0.0426561	-0.00759347	-0.151108	1.91067	-403
		1.912	-302	1.912	-228	1.912	-234		1.91333	-0.283318	-0.0417206	-0.00756102	-0.156384	1.912	-401
		1.91333	-298	1.91333	-223	1.91333	-233		1.91467	-0.284269	-0.0428431	-0.00752857	-0.155253	1.91333	-415
		1.91467	-299	1.91467	-229	1.91467	-232		1.916	-0.279516	-0.0445269	-0.00720406	-0.154876	1.91467	-412
		1.916	-294	1.916	-238	1.916	-222		1.91733	-0.273811	-0.0443398	-0.0068471	-0.156384	1.916	-411
		1.91733	-288	1.91733	-237	1.91733	-211		1.91867	-0.277614	-0.0443398	-0.00700935	-0.156384	1.91733	-415
		1.91867	-292	1.91867	-237	1.91867	-216		1.92	-0.284269	-0.0449011	-0.00707426	-0.156007	1.91867	-415
		1.92	-299	1.92	-240	1.92	-218		1.92133	-0.280466	-0.0456495	-0.00700935	-0.156007	1.92	-414
		1.92133	-295	1.92133	-244	1.92133	-216		1.92267	-0.273811	-0.0449011	-0.0069769	-0.156384	1.92133	-414
		1.92267	-288	1.92267	-240	1.92267	-215		1.924	-0.277614	-0.0450882	-0.00743121	-0.151485	1.92267	-415
		1.924	-292	1.924	-241	1.924	-229		1.92533	-0.286171	-0.0454624	-0.00710671	-0.152992	1.924	-402
		1.92533	-301	1.92533	-243	1.92533	-219		1.92667	-0.29853	-0.0456495	-0.0069769	-0.15563	1.92533	-406
		1.92667	-314	1.92667	-244	1.92667	-215		1.928	-0.305185	-0.0439657	-0.00720406	-0.158268	1.92667	-413
		1.928	-321	1.928	-235	1.928	-222		1.92933	-0.281417	-0.0413464	-0.00726896	-0.160152	1.928	-420
		1.92933	-296	1.92933	-221	1.92933	-224		1.93067	-0.28522	-0.0409723	-0.00704181	-0.160529	1.92933	-425
		1.93067	-300	1.93067	-219	1.93067	-217		1.932	-0.289974	-0.0435915	-0.00704181	-0.159021	1.93067	-426
		1.932	-305	1.932	-233	1.932	-217		1.93333	-0.287121	-0.044714	-0.00733386	-0.156384	1.932	-422
		1.93333	-302	1.93333	-239	1.93333	-226		1.93467	-0.270959	-0.0460236	-0.00733386	-0.157137	1.93333	-415
		1.93467	-285	1.93467	-246	1.93467	-226		1.936	-0.281417	-0.0462107	-0.00752857	-0.159398	1.93467	-417
		1.936	-296	1.936	-247	1.936	-232		1.93733	-0.288072	-0.0456495	-0.00759347	-0.160906	1.936	-423
		1.93733	-303	1.93733	-244	1.93733	-234		1.93867	-0.284269	-0.0486429	-0.00746366	-0.159021	1.93733	-427
		1.93867	-299	1.93867	-260	1.93867	-230		1.94	-0.299481	-0.0462107	-0.00752857	-0.154123	1.93867	-422
		1.94	-315	1.94	-247	1.94	-232		1.94133	-0.290924	-0.0428431	-0.00759347	-0.152239	1.94	-409
		1.94133	-306	1.94133	-229	1.94133	-234		1.94267	-0.280466	-0.0426561	-0.00762592	-0.152992	1.94133	-404
		1.94267	-295	1.94267	-228	1.94267	-235		1.944	-0.279516	-0.042469	-0.00756102	-0.15563	1.94267	-406
		1.944	-294	1.944	-227	1.944	-233		1.94533	-0.289974	-0.0443398	-0.00765837	-0.152615	1.944	-413
		1.94533	-305	1.94533	-237	1.94533	-236		1.94667	-0.286171	-0.0460236	-0.00791797	-0.152992	1.94533	-405
		1.94667	-301	1.94667	-246	1.94667	-244		1.948	-0.283318	-0.0449011	-0.00788552	-0.156007	1.94667	-406
		1.948	-298	1.948	-240	1.948	-243		1.94933	-0.296629	-0.0441528	-0.00704181	-0.160152	1.948	-414
		1.94933	-312	1.94933	-236	1.94933	-217		1.95067	-0.289974	-0.044714	-0.00743121	-0.155253	1.94933	-425
		1.95067	-305	1.95067	-239	1.95067	-229		1.952	-0.289023	-0.0454624	-0.00749612	-0.152992	1.95067	-412
		1.952	-304	1.952	-243	1.952	-231		1.95333	-0.289974	-0.044714	-0.00723651	-0.154123	1.952	-406
		1.95333	-305	1.95333	-239	1.95333	-223		1.95467	-0.284269	-0.0452753	-0.00713916	-0.151862	1.95333	-409
		1.95467	-299	1.95467	-242	1.95467	-220		1.956	-0.28522	-0.0450882	-0.00710671	-0.15563	1.95467	-403
		1.956	-300	1.956	-241	1.956	-219		1.95733	-0.292826	-0.0452753	-0.00713916	-0.157514	1.956	-413
		1.95733	-308	1.95733	-242	1.95733	-220		1.95867	-0.300432	-0.0482687	-0.00713916	-0.155253	1.95733	-418
		1.95867	-316	1.95867	-258	1.95867	-220		1.96	-0.300432	-0.0469591	-0.0069769	-0.156384	1.95867	-412
		1.96	-316	1.96	-251	1.96	-215		1.96133	-0.295678	-0.0458365	-0.00720406	-0.156384	1.96	-415
		1.96133	-311	1.96133	-245	1.96133	-222		1.96267	-0.286171	-0.0452753	-0.00749612	-0.15676	1.96133	-415
		1.96267	-301	1.96267	-242	1.96267	-231		1.964	-0.27286	-0.044714	-0.00772327	-0.158268	1.96267	-416
		1.964	-287	1.964	-239	1.964	-238		1.96533	-0.269057	-0.0443398	-0.00743121	-0.158268	1.964	-420
		1.96533	-283	1.96533	-237	1.96533	-229		1.96667	-0.294727	-0.044714	-0.00707426	-0.157514	1.96533	-420
		1.96667	-310	1.96667	-239	1.96667	-218		1.968	-0.308988	-0.0454624	-0.00704181	-0.15676	1.96667	-418
		1.968	-325	1.968	-243	1.968	-217		1.96933	-0.306136	-0.0458365	-0.00733386	-0.155253	1.968	-416
		1.96933	-322	1.96933	-245	1.96933	-226		1.97067	-0.297579	-0.0462107	-0.00720406	-0.151485	1.96933	-412
		1.97067	-313	1.97067	-247	1.97067	-222		1.972	-0.286171	-0.0462107	-0.00733386	-0.150354	1.97067	-402
		1.972	-301	1.972	-247	1.972	-226		1.97333	-0.281417	-0.0458365	-0.00743121	-0.149978	1.972	-399
		1.97333	-296	1.97333	-245	1.97333	-229		1.97467	-0.284269	-0.0469591	-0.00739876	-0.148093	1.97333	-398
		1.97467	-299	1.97467	-251	1.97467	-228		1.976	-0.306136	-0.0486429	-0.00743121	-0.151108	1.97467	-393
		1.976	-322	1.976	-260	1.976	-229		1.97733	-0.306136	-0.04883	-0.00730141	-0.15563	1.976	-401
		1.97733	-322	1.97733	-261	1.97733	-225		1.97867	-0.29853	-0.0463978	-0.00717161	-0.157891	1.97733	-413
		1.97867	-314	1.97867	-248	1.97867	-221		1.98	-0.290924	-0.0450882	-0.00710671	-0.154876	1.97867	-419
		1.98	-306	1.98	-241	1.98	-219		1.98133	-0.283318	-0.0445269	-0.00687955	-0.156007	1.98	-411
		1.98133	-298	1.98133	-238	1.98133	-212		1.98267	-0.278565	-0.0445269	-0.0068471	-0.157514	1.98133	-414
		1.98267	-293	1.98267	-238	1.98267	-211		1.984	-0.276663	-0.0449011	-0.00687955	-0.157514	1.98267	-418
		1.984	-291	1.984	-240	1.984	-212		1.98533	-0.280466	-0.0443398	-0.0067822	-0.156007	1.984	-418
		1.98533	-295	1.98533	-237	1.98533	-209		1.98667	-0.278565	-0.0437786	-0.0067822	-0.156007	1.98533	-414
		1.98667	-293	1.98667	-234	1.98667	-209		1.988	-0.292826	-0.0434044	-0.0069769	-0.1545	1.98667	-414
		1.988	-308	1.988	-232	1.988	-215		1.98933	-0.306136	-0.0434044	-0.00723651	-0.152239	1.988	-410
		1.98933	-322	1.98933	-232	1.98933	-223		1.99067	-0.296629	-0.0452753	-0.00723651	-0.153369	1.98933	-404
		1.99067	-312	1.99067	-242	1.99067	-223		1.992	-0.281417	-0.0465849	-0.00736631	-0.158268	1.99067	-407
		1.992	-296	1.992	-249	1.992	-227		1.99333	-0.276663	-0.0473332	-0.00739876	-0.162036	1.992	-420
		1.99333	-291	1.99333	-253	1.99333	-228		1.99467	-0.278565	-0.046772	-0.00726896	-0.163167	1.99333	-430
		1.99467	-293	1.99467	-250	1.99467	-224		1.996	-0.287121	-0.0462107	-0.00707426	-0.157891	1.99467	-433
		1.996	-302	1.996	-247	1.996	-218		1.99733	-0.300432	-0.0463978	-0.00710671	-0.156007	1.996	-419
		1.99733	-316	1.99733	-248	1.99733	-219		1.99867	-0.305185	-0.0473332	-0.00704181	-0.156007	1.99733	-414
		1.99867	-321	1.99867	-253	1.99867	-217		2	-0.304235	-0.0486429	-0.006912	-0.156007	1.99867	-414
		2	-320	2	-260	2	-213		2.00133	-0.31184	-0.0493912	-0.006912	-0.157891	2	-414
		2.00133	-328	2.00133	-264	2.00133	-213		2.00267	-0.304235	-0.0484558	-0.00681465	-0.153369	2.00133	-419
		2.00267	-320	2.00267	-259	2.00267	-210		2.004	-0.296629	-0.0458365	-0.0067822	-0.150354	2.00267	-407
		2.004	-312	2.004	-245	2.004	-209		2.00533	-0.291875	-0.0460236	-0.00687955	-0.15563	2.004	-399
		2.00533	-307	2.00533	-246	2.00533	-212		2.00667	-0.284269	-0.0454624	-0.00704181	-0.15563	2.00533	-413
		2.00667	-299	2.00667	-243	2.00667	-217		2.008	-0.281417	-0.044714	-0.0069769	-0.15676	2.00667	-413
		2.008	-296	2.008	-239	2.008	-215		2.00933	-0.283318	-0.044714	-0.006912	-0.158645	2.008	-416
		2.00933	-298	2.00933	-239	2.00933	-213		2.01067	-0.289974	-0.0456495	-0.00704181	-0.158268	2.00933	-421
		2.01067	-305	2.01067	-244	2.01067	-217		2.012	-0.296629	-0.0445269	-0.00756102	-0.160152	2.01067	-420
		2.012	-312	2.012	-238	2.012	-233		2.01333	-0.292826	-0.044714	-0.00743121	-0.16279	2.012	-425
		2.01333	-308	2.01333	-239	2.01333	-229		2.01467	-0.288072	-0.0482687	-0.00717161	-0.164297	2.01333	-432
		2.01467	-303	2.01467	-258	2.01467	-221		2.016	-0.287121	-0.0456495	-0.00733386	-0.16279	2.01467	-436
		2.016	-302	2.016	-244	2.016	-226		2.01733	-0.292826	-0.0454624	-0.00775572	-0.158268	2.016	-432
		2.01733	-308	2.01733	-243	2.01733	-239		2.01867	-0.294727	-0.0463978	-0.00795043	-0.15676	2.01733	-420
		2.01867	-310	2.01867	-248	2.01867	-245		2.02	-0.293777	-0.0456495	-0.00788552	-0.157137	2.01867	-416
		2.02	-309	2.02	-244	2.02	-243		2.02133	-0.290924	-0.0449011	-0.00743121	-0.157514	2.02	-417
		2.02133	-306	2.02133	-240	2.02133	-229		2.02267	-0.287121	-0.0465849	-0.00739876	-0.153746	2.02133	-418
		2.02267	-302	2.02267	-249	2.02267	-228		2.024	-0.288072	-0.04883	-0.00726896	-0.151485	2.02267	-408
		2.024	-303	2.024	-261	2.024	-224		2.02533	-0.291875	-0.0475203	-0.00713916	-0.151485	2.024	-402
		2.02533	-307	2.02533	-254	2.02533	-220		2.02667	-0.297579	-0.0462107	-0.00720406	-0.152992	2.02533	-402
		2.02667	-313	2.02667	-247	2.02667	-222		2.028	-0.294727	-0.0477074	-0.00736631	-0.156007	2.02667	-406
		2.028	-310	2.028	-255	2.028	-227		2.02933	-0.295678	-0.0501396	-0.00769082	-0.157514	2.028	-414
		2.02933	-311	2.02933	-268	2.02933	-237		2.03067	-0.297579	-0.0492041	-0.00804778	-0.157137	2.02933	-418
		2.03067	-313	2.03067	-263	2.03067	-248		2.032	-0.296629	-0.0484558	-0.00791797	-0.156384	2.03067	-417
		2.032	-312	2.032	-259	2.032	-244		2.03333	-0.302333	-0.0471462	-0.00775572	-0.161282	2.032	-415
		2.03333	-318	2.03333	-252	2.03333	-239		2.03467	-0.297579	-0.0456495	-0.00759347	-0.16392	2.03333	-428
		2.03467	-313	2.03467	-244	2.03467	-234		2.036	-0.288072	-0.0469591	-0.00746366	-0.160906	2.03467	-435
		2.036	-303	2.036	-251	2.036	-230		2.03733	-0.289023	-0.0452753	-0.00730141	-0.161659	2.036	-427
		2.03733	-304	2.03733	-242	2.03733	-225		2.03867	-0.284269	-0.044714	-0.00723651	-0.158645	2.03733	-429
		2.03867	-299	2.03867	-239	2.03867	-223		2.04	-0.286171	-0.0462107	-0.00717161	-0.155253	2.03867	-421
		2.04	-301	2.04	-247	2.04	-221		2.04133	-0.292826	-0.0456495	-0.00713916	-0.156007	2.04	-412
		2.04133	-308	2.04133	-244	2.04133	-220		2.04267	-0.287121	-0.0473332	-0.00710671	-0.158268	2.04133	-414
		2.04267	-302	2.04267	-253	2.04267	-219		2.044	-0.303284	-0.0478945	-0.00736631	-0.157514	2.04267	-420
		2.044	-319	2.044	-256	2.044	-227		2.04533	-0.308037	-0.0456495	-0.00746366	-0.157514	2.044	-418
		2.04533	-324	2.04533	-244	2.04533	-230		2.04667	-0.291875	-0.0462107	-0.00720406	-0.16279	2.04533	-418
		2.04667	-307	2.04667	-247	2.04667	-222		2.048	-0.292826	-0.0465849	-0.00723651	-0.161282	2.04667	-432
		2.048	-308	2.048	-249	2.048	-223		2.04933	-0.296629	-0.0473332	-0.00720406	-0.160152	2.048	-428
		2.04933	-312	2.04933	-253	2.04933	-222		2.05067	-0.302333	-0.0486429	-0.00713916	-0.160529	2.04933	-425
		2.05067	-318	2.05067	-260	2.05067	-220		2.052	-0.308988	-0.0503267	-0.00713916	-0.164297	2.05067	-426
		2.052	-325	2.052	-269	2.052	-220		2.05333	-0.312791	-0.049017	-0.00720406	-0.163543	2.052	-436
		2.05333	-329	2.05333	-262	2.05333	-222		2.05467	-0.308988	-0.0465849	-0.00743121	-0.16392	2.05333	-434
		2.05467	-325	2.05467	-249	2.05467	-229		2.056	-0.301382	-0.0463978	-0.00752857	-0.164674	2.05467	-435
		2.056	-317	2.056	-248	2.056	-232		2.05733	-0.291875	-0.049017	-0.00720406	-0.163167	2.056	-437
		2.05733	-307	2.05733	-262	2.05733	-222		2.05867	-0.292826	-0.051075	-0.00730141	-0.160906	2.05733	-433
		2.05867	-308	2.05867	-273	2.05867	-225		2.06	-0.291875	-0.0516363	-0.00717161	-0.162036	2.05867	-427
		2.06	-307	2.06	-276	2.06	-221		2.06133	-0.292826	-0.0501396	-0.0069769	-0.166558	2.06	-430
		2.06133	-308	2.06133	-268	2.06133	-215		2.06267	-0.303284	-0.0486429	-0.00713916	-0.170326	2.06133	-442
		2.06267	-319	2.06267	-260	2.06267	-220		2.064	-0.306136	-0.0480816	-0.00746366	-0.167312	2.06267	-452
		2.064	-322	2.064	-257	2.064	-230		2.06533	-0.303284	-0.0486429	-0.00752857	-0.16279	2.064	-444
		2.06533	-319	2.06533	-260	2.06533	-232		2.06667	-0.296629	-0.0501396	-0.00743121	-0.159398	2.06533	-432
		2.06667	-312	2.06667	-268	2.06667	-229		2.068	-0.288072	-0.0480816	-0.00746366	-0.160906	2.06667	-423
		2.068	-303	2.068	-257	2.068	-230		2.06933	-0.293777	-0.046772	-0.00756102	-0.164674	2.068	-427
		2.06933	-309	2.06933	-250	2.06933	-233		2.07067	-0.299481	-0.046772	-0.00739876	-0.167688	2.06933	-437
		2.07067	-315	2.07067	-250	2.07067	-228		2.072	-0.302333	-0.0460236	-0.00710671	-0.168819	2.07067	-445
		2.072	-318	2.072	-246	2.072	-219		2.07333	-0.29853	-0.0462107	-0.00723651	-0.167312	2.072	-448
		2.07333	-314	2.07333	-247	2.07333	-223		2.07467	-0.295678	-0.0473332	-0.00769082	-0.165428	2.07333	-444
		2.07467	-311	2.07467	-253	2.07467	-237		2.076	-0.293777	-0.0493912	-0.00785307	-0.165428	2.07467	-439
		2.076	-309	2.076	-264	2.076	-242		2.07733	-0.292826	-0.0503267	-0.00765837	-0.168819	2.076	-439
		2.07733	-308	2.07733	-269	2.07733	-236		2.07867	-0.294727	-0.0497654	-0.00756102	-0.163167	2.07733	-448
		2.07867	-310	2.07867	-266	2.07867	-233		2.08	-0.293777	-0.04883	-0.00739876	-0.162036	2.07867	-433
		2.08	-309	2.08	-261	2.08	-228		2.08133	-0.289974	-0.0478945	-0.00726896	-0.163167	2.08	-430
		2.08133	-305	2.08133	-256	2.08133	-224		2.08267	-0.288072	-0.0475203	-0.00723651	-0.160906	2.08133	-433
		2.08267	-303	2.08267	-254	2.08267	-223		2.084	-0.301382	-0.0478945	-0.00746366	-0.159398	2.08267	-427
		2.084	-317	2.084	-256	2.084	-230		2.08533	-0.302333	-0.049017	-0.00769082	-0.158268	2.084	-423
		2.08533	-318	2.08533	-262	2.08533	-237		2.08667	-0.303284	-0.051075	-0.00769082	-0.157514	2.08533	-420
		2.08667	-319	2.08667	-273	2.08667	-237		2.088	-0.308988	-0.0501396	-0.00739876	-0.157891	2.08667	-418
		2.088	-325	2.088	-268	2.088	-228		2.08933	-0.304235	-0.0492041	-0.00726896	-0.159775	2.088	-419
		2.08933	-320	2.08933	-263	2.08933	-224		2.09067	-0.29853	-0.049017	-0.00713916	-0.158268	2.08933	-424
		2.09067	-314	2.09067	-262	2.09067	-220		2.092	-0.297579	-0.0505137	-0.00710671	-0.154876	2.09067	-420
		2.092	-313	2.092	-270	2.092	-219		2.09333	-0.305185	-0.0516363	-0.00730141	-0.154876	2.092	-411
		2.09333	-321	2.09333	-276	2.09333	-225		2.09467	-0.308988	-0.0495783	-0.00720406	-0.160906	2.09333	-411
		2.09467	-325	2.09467	-265	2.09467	-222		2.096	-0.308988	-0.0471462	-0.00739876	-0.164674	2.09467	-427
		2.096	-325	2.096	-252	2.096	-228		2.09733	-0.304235	-0.0486429	-0.00775572	-0.164297	2.096	-437
		2.09733	-320	2.09733	-260	2.09733	-239		2.09867	-0.296629	-0.051075	-0.00775572	-0.16392	2.09733	-436
		2.09867	-312	2.09867	-273	2.09867	-239		2.1	-0.304235	-0.0518234	-0.00775572	-0.16392	2.09867	-435
		2.1	-320	2.1	-277	2.1	-239		2.10133	-0.305185	-0.0512621	-0.00756102	-0.165051	2.1	-435
		2.10133	-321	2.10133	-274	2.10133	-233		2.10267	-0.302333	-0.0508879	-0.00733386	-0.167312	2.10133	-438
		2.10267	-318	2.10267	-272	2.10267	-226		2.104	-0.305185	-0.0497654	-0.00749612	-0.166935	2.10267	-444
		2.104	-321	2.104	-266	2.104	-231		2.10533	-0.297579	-0.0475203	-0.00769082	-0.164297	2.104	-443
		2.10533	-313	2.10533	-254	2.10533	-237		2.10667	-0.297579	-0.0452753	-0.00772327	-0.16392	2.10533	-436
		2.10667	-313	2.10667	-242	2.10667	-238		2.108	-0.303284	-0.0478945	-0.00762592	-0.168065	2.10667	-435
		2.108	-319	2.108	-256	2.108	-235		2.10933	-0.304235	-0.0505137	-0.00749612	-0.163543	2.108	-446
		2.10933	-320	2.10933	-270	2.10933	-231		2.11067	-0.292826	-0.0518234	-0.00752857	-0.158645	2.10933	-434
		2.11067	-308	2.11067	-277	2.11067	-232		2.112	-0.289974	-0.0523846	-0.00769082	-0.157891	2.11067	-421
		2.112	-305	2.112	-280	2.112	-237		2.11333	-0.296629	-0.0527588	-0.00788552	-0.165051	2.112	-419
		2.11333	-312	2.11333	-282	2.11333	-243		2.11467	-0.297579	-0.0520104	-0.00769082	-0.166935	2.11333	-438
		2.11467	-313	2.11467	-278	2.11467	-237		2.116	-0.289974	-0.0512621	-0.00772327	-0.164297	2.11467	-443
		2.116	-305	2.116	-274	2.116	-238		2.11733	-0.289974	-0.051075	-0.00769082	-0.160906	2.116	-436
		2.11733	-305	2.11733	-273	2.11733	-237		2.11867	-0.303284	-0.0507008	-0.00730141	-0.159775	2.11733	-427
		2.11867	-319	2.11867	-271	2.11867	-225		2.12	-0.301382	-0.0499525	-0.00713916	-0.159775	2.11867	-424
		2.12	-317	2.12	-267	2.12	-220		2.12133	-0.29853	-0.0497654	-0.00733386	-0.161282	2.12	-424
		2.12133	-314	2.12133	-266	2.12133	-226		2.12267	-0.297579	-0.0512621	-0.00756102	-0.16392	2.12133	-428
		2.12267	-313	2.12267	-274	2.12267	-233		2.124	-0.297579	-0.0550039	-0.00746366	-0.167312	2.12267	-435
		2.124	-313	2.124	-294	2.124	-230		2.12533	-0.301382	-0.0535072	-0.00730141	-0.165051	2.124	-444
		2.12533	-317	2.12533	-286	2.12533	-225		2.12667	-0.308037	-0.0512621	-0.00743121	-0.162413	2.12533	-438
		2.12667	-324	2.12667	-274	2.12667	-229		2.128	-0.309939	-0.0535072	-0.00752857	-0.160906	2.12667	-431
		2.128	-326	2.128	-286	2.128	-232		2.12933	-0.301382	-0.0520104	-0.00723651	-0.161659	2.128	-427
		2.12933	-317	2.12933	-278	2.12933	-223		2.13067	-0.295678	-0.0508879	-0.00713916	-0.165804	2.12933	-429
		2.13067	-311	2.13067	-272	2.13067	-220		2.132	-0.293777	-0.0501396	-0.00723651	-0.166181	2.13067	-440
		2.132	-309	2.132	-268	2.132	-223		2.13333	-0.295678	-0.0501396	-0.00739876	-0.162413	2.132	-441
		2.13333	-311	2.13333	-268	2.13333	-228		2.13467	-0.301382	-0.049017	-0.00746366	-0.162413	2.13333	-431
		2.13467	-317	2.13467	-262	2.13467	-230		2.136	-0.303284	-0.0492041	-0.00726896	-0.164674	2.13467	-431
		2.136	-319	2.136	-263	2.136	-224		2.13733	-0.304235	-0.0497654	-0.00723651	-0.168065	2.136	-437
		2.13733	-320	2.13733	-266	2.13733	-223		2.13867	-0.305185	-0.0486429	-0.00739876	-0.17108	2.13733	-446
		2.13867	-321	2.13867	-260	2.13867	-228		2.14	-0.303284	-0.0508879	-0.00769082	-0.170703	2.13867	-454
		2.14	-319	2.14	-272	2.14	-237		2.14133	-0.306136	-0.0523846	-0.00759347	-0.167688	2.14	-453
		2.14133	-322	2.14133	-280	2.14133	-234		2.14267	-0.305185	-0.0520104	-0.00739876	-0.167312	2.14133	-445
		2.14267	-321	2.14267	-278	2.14267	-228		2.144	-0.299481	-0.0512621	-0.00723651	-0.172587	2.14267	-444
		2.144	-315	2.144	-274	2.144	-223		2.14533	-0.304235	-0.0529459	-0.00762592	-0.169196	2.144	-458
		2.14533	-320	2.14533	-283	2.14533	-235		2.14667	-0.306136	-0.0536942	-0.00733386	-0.167312	2.14533	-449
		2.14667	-322	2.14667	-287	2.14667	-226		2.148	-0.306136	-0.0525717	-0.00720406	-0.167688	2.14667	-444
		2.148	-322	2.148	-281	2.148	-222		2.14933	-0.302333	-0.0514492	-0.00743121	-0.169573	2.148	-445
		2.14933	-318	2.14933	-275	2.14933	-229		2.15067	-0.286171	-0.0501396	-0.00707426	-0.167312	2.14933	-450
		2.15067	-301	2.15067	-268	2.15067	-218		2.152	-0.286171	-0.0499525	-0.00707426	-0.167688	2.15067	-444
		2.152	-301	2.152	-267	2.152	-218		2.15333	-0.291875	-0.051075	-0.00723651	-0.169196	2.152	-445
		2.15333	-307	2.15333	-273	2.15333	-223		2.15467	-0.301382	-0.0533201	-0.00736631	-0.169573	2.15333	-449
		2.15467	-317	2.15467	-285	2.15467	-227		2.156	-0.314693	-0.053133	-0.00743121	-0.170703	2.15467	-450
		2.156	-331	2.156	-284	2.156	-229		2.15733	-0.307087	-0.0518234	-0.00736631	-0.17108	2.156	-453
		2.15733	-323	2.15733	-277	2.15733	-227		2.15867	-0.297579	-0.051075	-0.00720406	-0.170326	2.15733	-454
		2.15867	-313	2.15867	-273	2.15867	-222		2.16	-0.295678	-0.0523846	-0.00704181	-0.169573	2.15867	-452
		2.16	-311	2.16	-280	2.16	-217		2.16133	-0.308037	-0.0521975	-0.00707426	-0.170703	2.16	-450
		2.16133	-324	2.16133	-279	2.16133	-218		2.16267	-0.305185	-0.0516363	-0.00739876	-0.168819	2.16133	-453
		2.16267	-321	2.16267	-276	2.16267	-228		2.164	-0.296629	-0.0521975	-0.00765837	-0.165428	2.16267	-448
		2.164	-312	2.164	-279	2.164	-236		2.16533	-0.290924	-0.0516363	-0.00739876	-0.164674	2.164	-439
		2.16533	-306	2.16533	-276	2.16533	-228		2.16667	-0.292826	-0.0516363	-0.00749612	-0.168065	2.16533	-437
		2.16667	-308	2.16667	-276	2.16667	-231		2.168	-0.289023	-0.0520104	-0.00756102	-0.168442	2.16667	-446
		2.168	-304	2.168	-278	2.168	-233		2.16933	-0.287121	-0.0518234	-0.00756102	-0.166935	2.168	-447
		2.16933	-302	2.16933	-277	2.16933	-233		2.17067	-0.302333	-0.0501396	-0.00749612	-0.168442	2.16933	-443
		2.17067	-318	2.17067	-268	2.17067	-231		2.172	-0.299481	-0.0503267	-0.00765837	-0.17108	2.17067	-447
		2.172	-315	2.172	-269	2.172	-236		2.17333	-0.300432	-0.0518234	-0.00782062	-0.17108	2.172	-454
		2.17333	-316	2.17333	-277	2.17333	-241		2.17467	-0.302333	-0.051075	-0.00795043	-0.167688	2.17333	-454
		2.17467	-318	2.17467	-273	2.17467	-245		2.176	-0.301382	-0.0518234	-0.00769082	-0.164674	2.17467	-445
		2.176	-317	2.176	-277	2.176	-237		2.17733	-0.319446	-0.0514492	-0.00736631	-0.163167	2.176	-437
		2.17733	-336	2.17733	-275	2.17733	-227		2.17867	-0.3242	-0.0501396	-0.00726896	-0.163543	2.17733	-433
		2.17867	-341	2.17867	-268	2.17867	-224		2.18	-0.314693	-0.0497654	-0.00726896	-0.165051	2.17867	-434
		2.18	-331	2.18	-266	2.18	-224		2.18133	-0.301382	-0.0514492	-0.00730141	-0.165428	2.18	-438
		2.18133	-317	2.18133	-275	2.18133	-225		2.18267	-0.300432	-0.0525717	-0.00723651	-0.168442	2.18133	-439
		2.18267	-316	2.18267	-281	2.18267	-223		2.184	-0.29853	-0.0523846	-0.00733386	-0.168065	2.18267	-447
		2.184	-314	2.184	-280	2.184	-226		2.18533	-0.297579	-0.051075	-0.00762592	-0.160906	2.184	-446
		2.18533	-313	2.18533	-273	2.18533	-235		2.18667	-0.300432	-0.0507008	-0.00759347	-0.165428	2.18533	-427
		2.18667	-316	2.18667	-271	2.18667	-234		2.188	-0.302333	-0.051075	-0.00775572	-0.170703	2.18667	-439
		2.188	-318	2.188	-273	2.188	-239		2.18933	-0.308037	-0.0523846	-0.00795043	-0.172587	2.188	-453
		2.18933	-324	2.18933	-280	2.18933	-245		2.19067	-0.316594	-0.0523846	-0.00798288	-0.168442	2.18933	-458
		2.19067	-333	2.19067	-280	2.19067	-246		2.192	-0.31184	-0.0508879	-0.00765837	-0.169196	2.19067	-447
		2.192	-328	2.192	-272	2.192	-236		2.19333	-0.309939	-0.0499525	-0.00736631	-0.168065	2.192	-449
		2.19333	-326	2.19333	-267	2.19333	-227		2.19467	-0.312791	-0.0508879	-0.00723651	-0.165428	2.19333	-446
		2.19467	-329	2.19467	-272	2.19467	-223		2.196	-0.317545	-0.0505137	-0.00730141	-0.163167	2.19467	-439
		2.196	-334	2.196	-270	2.196	-225		2.19733	-0.315643	-0.0514492	-0.00736631	-0.166181	2.196	-433
		2.19733	-332	2.19733	-275	2.19733	-227		2.19867	-0.305185	-0.0516363	-0.00778817	-0.168442	2.19733	-441
		2.19867	-321	2.19867	-276	2.19867	-240		2.2	-0.29853	-0.04883	-0.00804778	-0.168442	2.19867	-447
		2.2	-314	2.2	-261	2.2	-248		2.20133	-0.305185	-0.0505137	-0.00762592	-0.166181	2.2	-447
		2.20133	-321	2.20133	-270	2.20133	-235		2.20267	-0.321348	-0.0508879	-0.00778817	-0.163543	2.20133	-441
		2.20267	-338	2.20267	-272	2.20267	-240		2.204	-0.322298	-0.0508879	-0.00775572	-0.16279	2.20267	-434
		2.204	-339	2.204	-272	2.204	-239		2.20533	-0.314693	-0.0523846	-0.00762592	-0.164674	2.204	-432
		2.20533	-331	2.20533	-280	2.20533	-235		2.20667	-0.305185	-0.0527588	-0.00765837	-0.168819	2.20533	-437
		2.20667	-321	2.20667	-282	2.20667	-236		2.208	-0.303284	-0.053133	-0.00762592	-0.16279	2.20667	-448
		2.208	-319	2.208	-284	2.208	-235		2.20933	-0.303284	-0.0535072	-0.00736631	-0.160906	2.208	-432
		2.20933	-319	2.20933	-286	2.20933	-227		2.21067	-0.304235	-0.0536942	-0.00707426	-0.167312	2.20933	-427
		2.21067	-320	2.21067	-287	2.21067	-218		2.212	-0.31184	-0.051075	-0.00720406	-0.171834	2.21067	-444
		2.212	-328	2.212	-273	2.212	-222		2.21333	-0.306136	-0.0505137	-0.00743121	-0.17108	2.212	-456
		2.21333	-322	2.21333	-270	2.21333	-229		2.21467	-0.301382	-0.0520104	-0.00746366	-0.169573	2.21333	-454
		2.21467	-317	2.21467	-278	2.21467	-230		2.216	-0.302333	-0.0516363	-0.00730141	-0.170326	2.21467	-450
		2.216	-318	2.216	-276	2.216	-225		2.21733	-0.31089	-0.0538813	-0.00717161	-0.168819	2.216	-452
		2.21733	-327	2.21733	-288	2.21733	-221		2.21867	-0.309939	-0.0546297	-0.00762592	-0.166558	2.21733	-448
		2.21867	-326	2.21867	-292	2.21867	-235		2.22	-0.31089	-0.0529459	-0.00801533	-0.165051	2.21867	-442
		2.22	-327	2.22	-283	2.22	-247		2.22133	-0.313742	-0.0521975	-0.00817758	-0.163543	2.22	-438
		2.22133	-330	2.22133	-279	2.22133	-252		2.22267	-0.31089	-0.0518234	-0.00791797	-0.160906	2.22133	-434
		2.22267	-327	2.22267	-277	2.22267	-244		2.224	-0.321348	-0.0518234	-0.00785307	-0.163543	2.22267	-427
		2.224	-338	2.224	-277	2.224	-242		2.22533	-0.330855	-0.0521975	-0.00782062	-0.167312	2.224	-434
		2.22533	-348	2.22533	-279	2.22533	-241		2.22667	-0.332757	-0.055378	-0.00775572	-0.166935	2.22533	-444
		2.22667	-350	2.22667	-296	2.22667	-239		2.228	-0.327052	-0.0544426	-0.00772327	-0.168442	2.22667	-443
		2.228	-344	2.228	-291	2.228	-238		2.22933	-0.318496	-0.0525717	-0.00752857	-0.168442	2.228	-447
		2.22933	-335	2.22933	-281	2.22933	-232		2.23067	-0.31184	-0.0520104	-0.00730141	-0.167312	2.22933	-447
		2.23067	-328	2.23067	-278	2.23067	-225		2.232	-0.31184	-0.0535072	-0.00713916	-0.167312	2.23067	-444
		2.232	-328	2.232	-286	2.232	-220		2.23333	-0.316594	-0.0538813	-0.00746366	-0.165804	2.232	-444
		2.23333	-333	2.23333	-288	2.23333	-230		2.23467	-0.319446	-0.0533201	-0.00782062	-0.166181	2.23333	-440
		2.23467	-336	2.23467	-285	2.23467	-241		2.236	-0.318496	-0.0525717	-0.00798288	-0.166935	2.23467	-441
		2.236	-335	2.236	-281	2.236	-246		2.23733	-0.31184	-0.0499525	-0.00791797	-0.165804	2.236	-443
		2.23733	-328	2.23733	-267	2.23733	-244		2.23867	-0.313742	-0.0493912	-0.00798288	-0.167688	2.23733	-440
		2.23867	-330	2.23867	-264	2.23867	-246		2.24	-0.318496	-0.0505137	-0.00795043	-0.168065	2.23867	-445
		2.24	-335	2.24	-270	2.24	-245		2.24133	-0.320397	-0.0518234	-0.00795043	-0.166558	2.24	-446
		2.24133	-337	2.24133	-277	2.24133	-245		2.24267	-0.314693	-0.0514492	-0.00814513	-0.165428	2.24133	-442
		2.24267	-331	2.24267	-275	2.24267	-251		2.244	-0.309939	-0.0508879	-0.00791797	-0.167688	2.24267	-439
		2.244	-326	2.244	-272	2.244	-244		2.24533	-0.307087	-0.0508879	-0.00762592	-0.168442	2.244	-445
		2.24533	-323	2.24533	-272	2.24533	-235		2.24667	-0.309939	-0.0520104	-0.00743121	-0.167312	2.24533	-447
		2.24667	-326	2.24667	-278	2.24667	-229		2.248	-0.322298	-0.0521975	-0.00733386	-0.169196	2.24667	-444
		2.248	-339	2.248	-279	2.248	-226		2.24933	-0.320397	-0.0520104	-0.00739876	-0.166935	2.248	-449
		2.24933	-337	2.24933	-278	2.24933	-228		2.25067	-0.320397	-0.0518234	-0.00733386	-0.166181	2.24933	-443
		2.25067	-337	2.25067	-277	2.25067	-226		2.252	-0.321348	-0.0512621	-0.00717161	-0.169196	2.25067	-441
		2.252	-338	2.252	-274	2.252	-221		2.25333	-0.308988	-0.0516363	-0.00717161	-0.166935	2.252	-449
		2.25333	-325	2.25333	-276	2.25333	-221		2.25467	-0.306136	-0.0518234	-0.00730141	-0.166181	2.25333	-443
		2.25467	-322	2.25467	-277	2.25467	-225		2.256	-0.309939	-0.0514492	-0.00743121	-0.165804	2.25467	-441
		2.256	-326	2.256	-275	2.256	-229		2.25733	-0.316594	-0.0493912	-0.00743121	-0.16392	2.256	-440
		2.25733	-333	2.25733	-264	2.25733	-229		2.25867	-0.321348	-0.049017	-0.00704181	-0.169949	2.25733	-435
		2.25867	-338	2.25867	-262	2.25867	-217		2.26	-0.322298	-0.0497654	-0.00730141	-0.171834	2.25867	-451
		2.26	-339	2.26	-266	2.26	-225		2.26133	-0.323249	-0.0508879	-0.00743121	-0.17221	2.26	-456
		2.26133	-340	2.26133	-272	2.26133	-229		2.26267	-0.325151	-0.0501396	-0.00704181	-0.173341	2.26133	-457
		2.26267	-342	2.26267	-268	2.26267	-217		2.264	-0.333707	-0.0508879	-0.00743121	-0.171834	2.26267	-460
		2.264	-351	2.264	-272	2.264	-229		2.26533	-0.329904	-0.0514492	-0.00746366	-0.169196	2.264	-456
		2.26533	-347	2.26533	-275	2.26533	-230		2.26667	-0.321348	-0.0503267	-0.00739876	-0.167312	2.26533	-449
		2.26667	-338	2.26667	-269	2.26667	-228		2.268	-0.313742	-0.0527588	-0.00746366	-0.169196	2.26667	-444
		2.268	-330	2.268	-282	2.268	-230		2.26933	-0.313742	-0.0520104	-0.00739876	-0.167688	2.268	-449
		2.26933	-330	2.26933	-278	2.26933	-228		2.27067	-0.318496	-0.0503267	-0.00752857	-0.166935	2.26933	-445
		2.27067	-335	2.27067	-269	2.27067	-232		2.272	-0.323249	-0.0508879	-0.00762592	-0.168065	2.27067	-443
		2.272	-340	2.272	-272	2.272	-235		2.27333	-0.318496	-0.0484558	-0.00749612	-0.172964	2.272	-446
		2.27333	-335	2.27333	-259	2.27333	-231		2.27467	-0.308988	-0.0465849	-0.00762592	-0.173718	2.27333	-459
		2.27467	-325	2.27467	-249	2.27467	-235		2.276	-0.321348	-0.0465849	-0.00769082	-0.172587	2.27467	-461
		2.276	-338	2.276	-249	2.276	-237		2.27733	-0.336559	-0.0495783	-0.00769082	-0.170326	2.276	-458
		2.27733	-354	2.27733	-265	2.27733	-237		2.27867	-0.327052	-0.0495783	-0.00759347	-0.169949	2.27733	-452
		2.27867	-344	2.27867	-265	2.27867	-234		2.28	-0.3242	-0.0495783	-0.00791797	-0.170326	2.27867	-451
		2.28	-341	2.28	-265	2.28	-244		2.28133	-0.327052	-0.0503267	-0.00811268	-0.170703	2.28	-452
		2.28133	-344	2.28133	-269	2.28133	-250		2.28267	-0.333707	-0.0505137	-0.00821003	-0.17108	2.28133	-453
		2.28267	-351	2.28267	-270	2.28267	-253		2.284	-0.343215	-0.0495783	-0.00824248	-0.171834	2.28267	-454
		2.284	-361	2.284	-265	2.284	-254		2.28533	-0.326101	-0.0497654	-0.00817758	-0.172964	2.284	-456
		2.28533	-343	2.28533	-266	2.28533	-252		2.28667	-0.315643	-0.0507008	-0.00808023	-0.173718	2.28533	-459
		2.28667	-332	2.28667	-271	2.28667	-249		2.288	-0.314693	-0.051075	-0.00788552	-0.173718	2.28667	-461
		2.288	-331	2.288	-273	2.288	-243		2.28933	-0.317545	-0.0507008	-0.00762592	-0.167688	2.288	-461
		2.28933	-334	2.28933	-271	2.28933	-235		2.29067	-0.312791	-0.0516363	-0.00778817	-0.169196	2.28933	-445
		2.29067	-329	2.29067	-276	2.29067	-240		2.292	-0.315643	-0.0538813	-0.00782062	-0.172964	2.29067	-449
		2.292	-332	2.292	-288	2.292	-241		2.29333	-0.3242	-0.0529459	-0.00756102	-0.175225	2.292	-459
		2.29333	-341	2.29333	-283	2.29333	-233		2.29467	-0.318496	-0.0525717	-0.00782062	-0.176356	2.29333	-465
		2.29467	-335	2.29467	-281	2.29467	-241		2.296	-0.321348	-0.0521975	-0.00762592	-0.174095	2.29467	-468
		2.296	-338	2.296	-279	2.296	-235		2.29733	-0.328003	-0.0516363	-0.00726896	-0.170703	2.296	-462
		2.29733	-345	2.29733	-276	2.29733	-224		2.29867	-0.331806	-0.0523846	-0.0069769	-0.168065	2.29733	-453
		2.29867	-349	2.29867	-280	2.29867	-215		2.3	-0.323249	-0.0527588	-0.00743121	-0.168819	2.29867	-446
		2.3	-340	2.3	-282	2.3	-229		2.30133	-0.328954	-0.0518234	-0.00746366	-0.170703	2.3	-448
		2.30133	-346	2.30133	-277	2.30133	-230		2.30267	-0.333707	-0.0486429	-0.00733386	-0.17221	2.30133	-453
		2.30267	-351	2.30267	-260	2.30267	-226		2.304	-0.329904	-0.0514492	-0.00736631	-0.17221	2.30267	-457
		2.304	-347	2.304	-275	2.304	-227		2.30533	-0.326101	-0.0521975	-0.00752857	-0.171457	2.304	-457
		2.30533	-343	2.30533	-279	2.30533	-232		2.30667	-0.325151	-0.0516363	-0.00765837	-0.17221	2.30533	-455
		2.30667	-342	2.30667	-276	2.30667	-236		2.308	-0.325151	-0.051075	-0.00762592	-0.173341	2.30667	-457
		2.308	-342	2.308	-273	2.308	-235		2.30933	-0.325151	-0.0499525	-0.00733386	-0.170326	2.308	-460
		2.30933	-342	2.30933	-267	2.30933	-226		2.31067	-0.335609	-0.0497654	-0.00739876	-0.167688	2.30933	-452
		2.31067	-353	2.31067	-266	2.31067	-228		2.312	-0.328954	-0.0501396	-0.00782062	-0.169573	2.31067	-445
		2.312	-346	2.312	-268	2.312	-241		2.31333	-0.316594	-0.0499525	-0.00824248	-0.173718	2.312	-450
		2.31333	-333	2.31333	-267	2.31333	-254		2.31467	-0.312791	-0.051075	-0.00814513	-0.172587	2.31333	-461
		2.31467	-329	2.31467	-273	2.31467	-251		2.316	-0.31184	-0.0525717	-0.00795043	-0.169573	2.31467	-458
		2.316	-328	2.316	-281	2.316	-245		2.31733	-0.308037	-0.0535072	-0.00775572	-0.167312	2.316	-450
		2.31733	-324	2.31733	-286	2.31733	-239		2.31867	-0.307087	-0.0523846	-0.00756102	-0.166935	2.31733	-444
		2.31867	-323	2.31867	-280	2.31867	-233		2.32	-0.321348	-0.0535072	-0.00746366	-0.169573	2.31867	-443
		2.32	-338	2.32	-286	2.32	-230		2.32133	-0.326101	-0.0529459	-0.00752857	-0.174095	2.32	-450
		2.32133	-343	2.32133	-283	2.32133	-232		2.32267	-0.325151	-0.0512621	-0.00762592	-0.176732	2.32133	-462
		2.32267	-342	2.32267	-274	2.32267	-235		2.324	-0.322298	-0.053133	-0.00769082	-0.175979	2.32267	-469
		2.324	-339	2.324	-284	2.324	-237		2.32533	-0.322298	-0.0525717	-0.00752857	-0.172964	2.324	-467
		2.32533	-339	2.32533	-281	2.32533	-232		2.32667	-0.332757	-0.0521975	-0.00762592	-0.174848	2.32533	-459
		2.32667	-350	2.32667	-279	2.32667	-235		2.328	-0.332757	-0.053133	-0.00778817	-0.177109	2.32667	-464
		2.328	-350	2.328	-284	2.328	-240		2.32933	-0.325151	-0.0538813	-0.00791797	-0.175602	2.328	-470
		2.32933	-342	2.32933	-288	2.32933	-244		2.33067	-0.327052	-0.0542555	-0.00782062	-0.176356	2.32933	-466
		2.33067	-344	2.33067	-290	2.33067	-241		2.332	-0.327052	-0.0533201	-0.00756102	-0.174848	2.33067	-468
		2.332	-344	2.332	-285	2.332	-233		2.33333	-0.320397	-0.0505137	-0.00730141	-0.172964	2.332	-464
		2.33333	-337	2.33333	-270	2.33333	-225		2.33467	-0.306136	-0.0508879	-0.00704181	-0.17221	2.33333	-459
		2.33467	-322	2.33467	-272	2.33467	-217		2.336	-0.308988	-0.0525717	-0.00733386	-0.17824	2.33467	-457
		2.336	-325	2.336	-281	2.336	-226		2.33733	-0.312791	-0.0535072	-0.00769082	-0.179747	2.336	-473
		2.33733	-329	2.33733	-286	2.33733	-237		2.33867	-0.316594	-0.0535072	-0.00772327	-0.177486	2.33733	-477
		2.33867	-333	2.33867	-286	2.33867	-238		2.34	-0.320397	-0.0544426	-0.00710671	-0.173718	2.33867	-471
		2.34	-337	2.34	-291	2.34	-219		2.34133	-0.313742	-0.0550039	-0.00769082	-0.170326	2.34	-461
		2.34133	-330	2.34133	-294	2.34133	-237		2.34267	-0.308037	-0.0548168	-0.00769082	-0.169573	2.34133	-452
		2.34267	-324	2.34267	-293	2.34267	-237		2.344	-0.31184	-0.053133	-0.00752857	-0.171457	2.34267	-450
		2.344	-328	2.344	-284	2.344	-232		2.34533	-0.329904	-0.0546297	-0.00788552	-0.173718	2.344	-455
		2.34533	-347	2.34533	-292	2.34533	-243		2.34667	-0.328003	-0.0540684	-0.00772327	-0.174848	2.34533	-461
		2.34667	-345	2.34667	-289	2.34667	-238		2.348	-0.325151	-0.0523846	-0.00788552	-0.175225	2.34667	-464
		2.348	-342	2.348	-280	2.348	-243		2.34933	-0.321348	-0.0533201	-0.00811268	-0.175225	2.348	-465
		2.34933	-338	2.34933	-285	2.34933	-250		2.35067	-0.315643	-0.0521975	-0.00795043	-0.177486	2.34933	-465
		2.35067	-332	2.35067	-279	2.35067	-245		2.352	-0.31089	-0.0516363	-0.00778817	-0.173718	2.35067	-471
		2.352	-327	2.352	-276	2.352	-240		2.35333	-0.321348	-0.0514492	-0.00769082	-0.171457	2.352	-461
		2.35333	-338	2.35333	-275	2.35333	-237		2.35467	-0.335609	-0.0507008	-0.00772327	-0.173341	2.35333	-455
		2.35467	-353	2.35467	-271	2.35467	-238		2.356	-0.333707	-0.051075	-0.00811268	-0.175602	2.35467	-460
		2.356	-351	2.356	-273	2.356	-250		2.35733	-0.323249	-0.0516363	-0.00843719	-0.17824	2.356	-466
		2.35733	-340	2.35733	-276	2.35733	-260		2.35867	-0.326101	-0.0518234	-0.00830738	-0.179747	2.35733	-473
		2.35867	-343	2.35867	-277	2.35867	-256		2.36	-0.335609	-0.0525717	-0.00791797	-0.178993	2.35867	-477
		2.36	-353	2.36	-281	2.36	-244		2.36133	-0.331806	-0.0516363	-0.00840474	-0.177109	2.36	-475
		2.36133	-349	2.36133	-276	2.36133	-259		2.36267	-0.339412	-0.0507008	-0.00808023	-0.176732	2.36133	-470
		2.36267	-357	2.36267	-271	2.36267	-249		2.364	-0.343215	-0.0505137	-0.00772327	-0.177486	2.36267	-469
		2.364	-361	2.364	-270	2.364	-238		2.36533	-0.340362	-0.0514492	-0.00762592	-0.178617	2.364	-471
		2.36533	-358	2.36533	-275	2.36533	-235		2.36667	-0.336559	-0.0523846	-0.00772327	-0.177863	2.36533	-474
		2.36667	-354	2.36667	-280	2.36667	-238		2.368	-0.331806	-0.053133	-0.00795043	-0.177863	2.36667	-472
		2.368	-349	2.368	-284	2.368	-245		2.36933	-0.329904	-0.0529459	-0.00817758	-0.175602	2.368	-472
		2.36933	-347	2.36933	-283	2.36933	-252		2.37067	-0.330855	-0.0514492	-0.00837229	-0.168065	2.36933	-466
		2.37067	-348	2.37067	-275	2.37067	-258		2.372	-0.332757	-0.0512621	-0.00811268	-0.172587	2.37067	-446
		2.372	-350	2.372	-274	2.372	-250		2.37333	-0.331806	-0.0520104	-0.00785307	-0.174848	2.372	-458
		2.37333	-349	2.37333	-278	2.37333	-242		2.37467	-0.333707	-0.0527588	-0.00791797	-0.173718	2.37333	-464
		2.37467	-351	2.37467	-282	2.37467	-244		2.376	-0.340362	-0.0536942	-0.00850209	-0.169573	2.37467	-461
		2.376	-358	2.376	-287	2.376	-262		2.37733	-0.340362	-0.0550039	-0.00814513	-0.171457	2.376	-450
		2.37733	-358	2.37733	-294	2.37733	-251		2.37867	-0.345116	-0.0559393	-0.00791797	-0.174471	2.37733	-455
		2.37867	-363	2.37867	-299	2.37867	-244		2.38	-0.345116	-0.0559393	-0.00785307	-0.176356	2.37867	-463
		2.38	-363	2.38	-299	2.38	-242		2.38133	-0.329904	-0.0540684	-0.00782062	-0.175602	2.38	-468
		2.38133	-347	2.38133	-289	2.38133	-241		2.38267	-0.3242	-0.0535072	-0.00840474	-0.177109	2.38133	-466
		2.38267	-341	2.38267	-286	2.38267	-259		2.384	-0.327052	-0.0538813	-0.00840474	-0.176732	2.38267	-470
		2.384	-344	2.384	-288	2.384	-259		2.38533	-0.328003	-0.0546297	-0.00804778	-0.174471	2.384	-469
		2.38533	-345	2.38533	-292	2.38533	-248		2.38667	-0.321348	-0.0546297	-0.00795043	-0.176732	2.38533	-463
		2.38667	-338	2.38667	-292	2.38667	-245		2.388	-0.336559	-0.0536942	-0.00752857	-0.17824	2.38667	-469
		2.388	-354	2.388	-287	2.388	-232		2.38933	-0.340362	-0.0527588	-0.00736631	-0.176732	2.388	-473
		2.38933	-358	2.38933	-282	2.38933	-227		2.39067	-0.33751	-0.0535072	-0.00759347	-0.173341	2.38933	-469
		2.39067	-355	2.39067	-286	2.39067	-234		2.392	-0.342264	-0.053133	-0.00833983	-0.176356	2.39067	-460
		2.392	-360	2.392	-284	2.392	-257		2.39333	-0.338461	-0.0525717	-0.00827493	-0.177109	2.392	-468
		2.39333	-356	2.39333	-281	2.39333	-255		2.39467	-0.334658	-0.0529459	-0.00830738	-0.177486	2.39333	-470
		2.39467	-352	2.39467	-283	2.39467	-256		2.396	-0.330855	-0.055378	-0.00859944	-0.180124	2.39467	-471
		2.396	-348	2.396	-296	2.396	-265		2.39733	-0.328003	-0.0546297	-0.00856699	-0.17937	2.396	-478
		2.39733	-345	2.39733	-292	2.39733	-264		2.39867	-0.341313	-0.0538813	-0.00840474	-0.178993	2.39733	-476
		2.39867	-359	2.39867	-288	2.39867	-259		2.4	-0.348919	-0.0538813	-0.00814513	-0.178993	2.39867	-475
		2.4	-367	2.4	-288	2.4	-251		2.40133	-0.34987	-0.0521975	-0.00785307	-0.178617	2.4	-475
		2.40133	-368	2.40133	-279	2.40133	-242		2.40267	-0.359377	-0.0523846	-0.00814513	-0.175979	2.40133	-474
		2.40267	-378	2.40267	-280	2.40267	-251		2.404	-0.358426	-0.053133	-0.00837229	-0.175225	2.40267	-467
		2.404	-377	2.404	-284	2.404	-258		2.40533	-0.355574	-0.0536942	-0.00863189	-0.175979	2.404	-465
		2.40533	-374	2.40533	-287	2.40533	-266		2.40667	-0.351771	-0.0514492	-0.0088266	-0.177486	2.40533	-467
		2.40667	-370	2.40667	-275	2.40667	-272		2.408	-0.33751	-0.0518234	-0.00837229	-0.175602	2.40667	-471
		2.408	-355	2.408	-277	2.408	-258		2.40933	-0.341313	-0.053133	-0.00824248	-0.177486	2.408	-466
		2.40933	-359	2.40933	-284	2.40933	-254		2.41067	-0.343215	-0.0544426	-0.00837229	-0.179747	2.40933	-471
		2.41067	-361	2.41067	-291	2.41067	-258		2.412	-0.335609	-0.0518234	-0.00859944	-0.177486	2.41067	-477
		2.412	-353	2.412	-277	2.412	-265		2.41333	-0.35082	-0.0512621	-0.00872924	-0.177109	2.412	-471
		2.41333	-369	2.41333	-274	2.41333	-269		2.41467	-0.355574	-0.0516363	-0.00892395	-0.175602	2.41333	-470
		2.41467	-374	2.41467	-276	2.41467	-275		2.416	-0.35082	-0.0503267	-0.00892395	-0.173718	2.41467	-466
		2.416	-369	2.416	-269	2.416	-275		2.41733	-0.343215	-0.0520104	-0.00853454	-0.176732	2.416	-461
		2.41733	-361	2.41733	-278	2.41733	-263		2.41867	-0.347968	-0.0540684	-0.00859944	-0.174848	2.41733	-469
		2.41867	-366	2.41867	-289	2.41867	-265		2.42	-0.343215	-0.0548168	-0.00853454	-0.173341	2.41867	-464
		2.42	-361	2.42	-293	2.42	-263		2.42133	-0.336559	-0.0529459	-0.00853454	-0.174095	2.42	-460
		2.42133	-354	2.42133	-283	2.42133	-263		2.42267	-0.343215	-0.0520104	-0.00918355	-0.174095	2.42133	-462
		2.42267	-361	2.42267	-278	2.42267	-283		2.424	-0.358426	-0.0538813	-0.00872924	-0.171834	2.42267	-462
		2.424	-377	2.424	-288	2.424	-269		2.42533	-0.358426	-0.0566876	-0.00840474	-0.169949	2.424	-456
		2.42533	-377	2.42533	-303	2.42533	-259		2.42667	-0.353673	-0.0563135	-0.00833983	-0.169573	2.42533	-451
		2.42667	-372	2.42667	-301	2.42667	-257		2.428	-0.367934	-0.055378	-0.00837229	-0.171457	2.42667	-450
		2.428	-387	2.428	-296	2.428	-258		2.42933	-0.366983	-0.0550039	-0.00824248	-0.174848	2.428	-455
		2.42933	-386	2.42933	-294	2.42933	-254		2.43067	-0.364131	-0.0548168	-0.00824248	-0.177109	2.42933	-464
		2.43067	-383	2.43067	-293	2.43067	-254		2.432	-0.36318	-0.0516363	-0.00850209	-0.177486	2.43067	-470
		2.432	-382	2.432	-276	2.432	-262		2.43333	-0.359377	-0.051075	-0.00898885	-0.176356	2.432	-471
		2.43333	-378	2.43333	-273	2.43333	-277		2.43467	-0.353673	-0.0516363	-0.0090862	-0.176356	2.43333	-468
		2.43467	-372	2.43467	-276	2.43467	-280		2.436	-0.354623	-0.0520104	-0.00898885	-0.175602	2.43467	-468
		2.436	-373	2.436	-278	2.436	-277		2.43733	-0.360328	-0.0503267	-0.00885905	-0.17221	2.436	-466
		2.43733	-379	2.43733	-269	2.43733	-273		2.43867	-0.354623	-0.0508879	-0.00885905	-0.172587	2.43733	-457
		2.43867	-373	2.43867	-272	2.43867	-273		2.44	-0.347018	-0.0523846	-0.0089564	-0.172587	2.43867	-458
		2.44	-365	2.44	-280	2.44	-276		2.44133	-0.343215	-0.0542555	-0.0090213	-0.174095	2.44	-458
		2.44133	-361	2.44133	-290	2.44133	-278		2.44267	-0.347018	-0.0544426	-0.0088266	-0.177486	2.44133	-462
		2.44267	-365	2.44267	-291	2.44267	-272		2.444	-0.354623	-0.055378	-0.00846964	-0.175602	2.44267	-471
		2.444	-373	2.444	-296	2.444	-261		2.44533	-0.365081	-0.0557522	-0.00808023	-0.174471	2.444	-466
		2.44533	-384	2.44533	-298	2.44533	-249		2.44667	-0.367934	-0.0550039	-0.00788552	-0.172964	2.44533	-463
		2.44667	-387	2.44667	-294	2.44667	-243		2.448	-0.357476	-0.0533201	-0.00808023	-0.169949	2.44667	-459
		2.448	-376	2.448	-285	2.448	-249		2.44933	-0.346067	-0.0544426	-0.00811268	-0.169196	2.448	-451
		2.44933	-364	2.44933	-291	2.44933	-250		2.45067	-0.343215	-0.0559393	-0.00833983	-0.168819	2.44933	-449
		2.45067	-361	2.45067	-299	2.45067	-257		2.452	-0.343215	-0.055378	-0.00850209	-0.167688	2.45067	-448
		2.452	-361	2.452	-296	2.452	-262		2.45333	-0.343215	-0.0546297	-0.00840474	-0.166558	2.452	-445
		2.45333	-361	2.45333	-292	2.45333	-259		2.45467	-0.348919	-0.0544426	-0.00837229	-0.174471	2.45333	-442
		2.45467	-367	2.45467	-291	2.45467	-258		2.456	-0.346067	-0.0546297	-0.00846964	-0.178993	2.45467	-463
		2.456	-364	2.456	-292	2.456	-261		2.45733	-0.341313	-0.0550039	-0.00853454	-0.17937	2.456	-475
		2.45733	-359	2.45733	-294	2.45733	-263		2.45867	-0.347018	-0.0538813	-0.00843719	-0.181254	2.45733	-476
		2.45867	-365	2.45867	-288	2.45867	-260		2.46	-0.362229	-0.0551909	-0.00863189	-0.182762	2.45867	-481
		2.46	-381	2.46	-295	2.46	-266		2.46133	-0.36318	-0.0570618	-0.00869679	-0.181631	2.46	-485
		2.46133	-382	2.46133	-305	2.46133	-268		2.46267	-0.357476	-0.0544426	-0.00863189	-0.177863	2.46133	-482
		2.46267	-376	2.46267	-291	2.46267	-266		2.464	-0.354623	-0.0535072	-0.00866434	-0.177863	2.46267	-472
		2.464	-373	2.464	-286	2.464	-267		2.46533	-0.345116	-0.0544426	-0.00853454	-0.177863	2.464	-472
		2.46533	-363	2.46533	-291	2.46533	-263		2.46667	-0.336559	-0.0557522	-0.00856699	-0.176732	2.46533	-472
		2.46667	-354	2.46667	-298	2.46667	-264		2.468	-0.334658	-0.0535072	-0.00885905	-0.175602	2.46667	-469
		2.468	-352	2.468	-286	2.468	-273		2.46933	-0.347968	-0.0538813	-0.0090862	-0.177486	2.468	-466
		2.46933	-366	2.46933	-288	2.46933	-280		2.47067	-0.352722	-0.0536942	-0.00879414	-0.180124	2.46933	-471
		2.47067	-371	2.47067	-287	2.47067	-271		2.472	-0.347968	-0.0523846	-0.00876169	-0.180877	2.47067	-478
		2.472	-366	2.472	-280	2.472	-270		2.47333	-0.339412	-0.0550039	-0.009216	-0.177109	2.472	-480
		2.47333	-357	2.47333	-294	2.47333	-284		2.47467	-0.354623	-0.0546297	-0.00905375	-0.174848	2.47333	-470
		2.47467	-373	2.47467	-292	2.47467	-279		2.476	-0.360328	-0.0533201	-0.00876169	-0.177109	2.47467	-464
		2.476	-379	2.476	-285	2.476	-270		2.47733	-0.357476	-0.0529459	-0.00846964	-0.179747	2.476	-470
		2.47733	-376	2.47733	-283	2.47733	-261		2.47867	-0.34987	-0.0525717	-0.00817758	-0.17937	2.47733	-477
		2.47867	-368	2.47867	-281	2.47867	-252		2.48	-0.352722	-0.0548168	-0.00876169	-0.183138	2.47867	-476
		2.48	-371	2.48	-293	2.48	-270		2.48133	-0.345116	-0.0566876	-0.00869679	-0.183515	2.48	-486
		2.48133	-363	2.48133	-303	2.48133	-268		2.48267	-0.342264	-0.0561264	-0.00850209	-0.182008	2.48133	-487
		2.48267	-360	2.48267	-300	2.48267	-262		2.484	-0.353673	-0.0565006	-0.00856699	-0.179747	2.48267	-483
		2.484	-372	2.484	-302	2.484	-264		2.48533	-0.355574	-0.0565006	-0.00859944	-0.17824	2.484	-477
		2.48533	-374	2.48533	-302	2.48533	-265		2.48667	-0.351771	-0.0563135	-0.00859944	-0.17824	2.48533	-473
		2.48667	-370	2.48667	-301	2.48667	-265		2.488	-0.351771	-0.0559393	-0.00853454	-0.178617	2.48667	-473
		2.488	-370	2.488	-299	2.488	-263		2.48933	-0.358426	-0.0563135	-0.00827493	-0.17824	2.488	-474
		2.48933	-377	2.48933	-301	2.48933	-255		2.49067	-0.354623	-0.0551909	-0.00859944	-0.17824	2.48933	-473
		2.49067	-373	2.49067	-295	2.49067	-265		2.492	-0.360328	-0.0533201	-0.0088266	-0.178617	2.49067	-473
		2.492	-379	2.492	-285	2.492	-272		2.49333	-0.362229	-0.0535072	-0.0088915	-0.17937	2.492	-474
		2.49333	-381	2.49333	-286	2.49333	-274		2.49467	-0.345116	-0.0548168	-0.0088915	-0.177486	2.49333	-476
		2.49467	-363	2.49467	-293	2.49467	-274		2.496	-0.351771	-0.0551909	-0.00898885	-0.17824	2.49467	-471
		2.496	-370	2.496	-295	2.496	-277		2.49733	-0.356525	-0.0550039	-0.00905375	-0.177109	2.496	-473
		2.49733	-375	2.49733	-294	2.49733	-279		2.49867	-0.355574	-0.0561264	-0.0089564	-0.174095	2.49733	-470
		2.49867	-374	2.49867	-300	2.49867	-276		2.5	-0.347018	-0.0563135	-0.00853454	-0.177486	2.49867	-462
		2.5	-365	2.5	-301	2.5	-263		2.50133	-0.344165	-0.0570618	-0.00853454	-0.177109	2.5	-471
		2.50133	-362	2.50133	-305	2.50133	-263		2.50267	-0.345116	-0.0579973	-0.00879414	-0.176732	2.50133	-470
		2.50267	-363	2.50267	-310	2.50267	-271		2.504	-0.346067	-0.0565006	-0.00911865	-0.178617	2.50267	-469
		2.504	-364	2.504	-302	2.504	-281		2.50533	-0.348919	-0.0576231	-0.00905375	-0.181631	2.504	-474
		2.50533	-367	2.50533	-308	2.50533	-279		2.50667	-0.341313	-0.0579973	-0.00869679	-0.178993	2.50533	-482
		2.50667	-359	2.50667	-310	2.50667	-268		2.508	-0.336559	-0.0565006	-0.00846964	-0.175602	2.50667	-475
		2.508	-354	2.508	-302	2.508	-261		2.50933	-0.338461	-0.0572489	-0.00843719	-0.174848	2.508	-466
		2.50933	-356	2.50933	-306	2.50933	-260		2.51067	-0.348919	-0.0589327	-0.0088266	-0.177863	2.50933	-464
		2.51067	-367	2.51067	-315	2.51067	-272		2.512	-0.359377	-0.0593069	-0.00853454	-0.17937	2.51067	-472
		2.512	-378	2.512	-317	2.512	-263		2.51333	-0.360328	-0.0579973	-0.00824248	-0.179747	2.512	-476
		2.51333	-379	2.51333	-310	2.51333	-254		2.51467	-0.348919	-0.0583714	-0.00824248	-0.180877	2.51333	-477
		2.51467	-367	2.51467	-312	2.51467	-254		2.516	-0.345116	-0.0565006	-0.00872924	-0.179747	2.51467	-480
		2.516	-363	2.516	-302	2.516	-269		2.51733	-0.341313	-0.0550039	-0.0089564	-0.178993	2.516	-477
		2.51733	-359	2.51733	-294	2.51733	-276		2.51867	-0.339412	-0.0565006	-0.00885905	-0.17824	2.51733	-475
		2.51867	-357	2.51867	-302	2.51867	-273		2.52	-0.340362	-0.0563135	-0.00856699	-0.178993	2.51867	-473
		2.52	-358	2.52	-301	2.52	-264		2.52133	-0.346067	-0.0561264	-0.00885905	-0.177109	2.52	-475
		2.52133	-364	2.52133	-300	2.52133	-273		2.52267	-0.345116	-0.0555651	-0.0088915	-0.17937	2.52133	-470
		2.52267	-363	2.52267	-297	2.52267	-274		2.524	-0.343215	-0.0536942	-0.00869679	-0.182008	2.52267	-476
		2.524	-361	2.524	-287	2.524	-268		2.52533	-0.346067	-0.0514492	-0.00833983	-0.175602	2.524	-483
		2.52533	-364	2.52533	-275	2.52533	-257		2.52667	-0.336559	-0.0514492	-0.00872924	-0.177486	2.52533	-466
		2.52667	-354	2.52667	-275	2.52667	-269		2.528	-0.328954	-0.053133	-0.0090213	-0.180877	2.52667	-471
		2.528	-346	2.528	-284	2.528	-278		2.52933	-0.327052	-0.0566876	-0.0091511	-0.182385	2.528	-480
		2.52933	-344	2.52933	-303	2.52933	-282		2.53067	-0.335609	-0.0565006	-0.0090213	-0.180124	2.52933	-484
		2.53067	-353	2.53067	-302	2.53067	-278		2.532	-0.330855	-0.0555651	-0.00850209	-0.180877	2.53067	-478
		2.532	-348	2.532	-297	2.532	-262		2.53333	-0.332757	-0.0544426	-0.00833983	-0.181631	2.532	-480
		2.53333	-350	2.53333	-291	2.53333	-257		2.53467	-0.340362	-0.0542555	-0.00846964	-0.181631	2.53333	-482
		2.53467	-358	2.53467	-290	2.53467	-261		2.536	-0.343215	-0.0533201	-0.00872924	-0.180124	2.53467	-482
		2.536	-361	2.536	-285	2.536	-269		2.53733	-0.348919	-0.0538813	-0.00859944	-0.180124	2.536	-478
		2.53733	-367	2.53733	-288	2.53733	-265		2.53867	-0.352722	-0.0559393	-0.00866434	-0.180501	2.53733	-478
		2.53867	-371	2.53867	-299	2.53867	-267		2.54	-0.352722	-0.0568747	-0.0088915	-0.182008	2.53867	-479
		2.54	-371	2.54	-304	2.54	-274		2.54133	-0.34987	-0.0570618	-0.0090862	-0.182385	2.54	-483
		2.54133	-368	2.54133	-305	2.54133	-280		2.54267	-0.347018	-0.0572489	-0.00934581	-0.182385	2.54133	-484
		2.54267	-365	2.54267	-306	2.54267	-288		2.544	-0.34987	-0.0572489	-0.0090862	-0.182385	2.54267	-484
		2.544	-368	2.544	-306	2.544	-280		2.54533	-0.356525	-0.0568747	-0.00843719	-0.183138	2.544	-484
		2.54533	-375	2.54533	-304	2.54533	-260		2.54667	-0.357476	-0.0572489	-0.00934581	-0.180501	2.54533	-486
		2.54667	-376	2.54667	-306	2.54667	-288		2.548	-0.358426	-0.0578102	-0.0089564	-0.177863	2.54667	-479
		2.548	-377	2.548	-309	2.548	-276		2.54933	-0.352722	-0.0583714	-0.00837229	-0.177109	2.548	-472
		2.54933	-371	2.54933	-312	2.54933	-258		2.55067	-0.342264	-0.0576231	-0.00821003	-0.178993	2.54933	-470
		2.55067	-360	2.55067	-308	2.55067	-253		2.552	-0.35082	-0.0583714	-0.00827493	-0.175602	2.55067	-475
		2.552	-369	2.552	-312	2.552	-255		2.55333	-0.351771	-0.059494	-0.00827493	-0.175225	2.552	-466
		2.55333	-370	2.55333	-318	2.55333	-255		2.55467	-0.351771	-0.0591198	-0.00837229	-0.176356	2.55333	-465
		2.55467	-370	2.55467	-316	2.55467	-258		2.556	-0.357476	-0.0572489	-0.00866434	-0.174471	2.55467	-468
		2.556	-376	2.556	-306	2.556	-267		2.55733	-0.358426	-0.0568747	-0.00866434	-0.180124	2.556	-463
		2.55733	-377	2.55733	-304	2.55733	-267		2.55867	-0.347018	-0.057436	-0.00863189	-0.182385	2.55733	-478
		2.55867	-365	2.55867	-307	2.55867	-266		2.56	-0.339412	-0.0579973	-0.00856699	-0.180501	2.55867	-484
		2.56	-357	2.56	-310	2.56	-264		2.56133	-0.343215	-0.0568747	-0.00853454	-0.177863	2.56	-479
		2.56133	-361	2.56133	-304	2.56133	-263		2.56267	-0.359377	-0.0583714	-0.00846964	-0.176732	2.56133	-472
		2.56267	-378	2.56267	-312	2.56267	-261		2.564	-0.359377	-0.0606165	-0.00856699	-0.176356	2.56267	-469
		2.564	-378	2.564	-324	2.564	-264		2.56533	-0.355574	-0.0613648	-0.00869679	-0.177863	2.564	-468
		2.56533	-374	2.56533	-328	2.56533	-268		2.56667	-0.365081	-0.0604294	-0.00876169	-0.183138	2.56533	-472
		2.56667	-384	2.56667	-323	2.56667	-270		2.568	-0.355574	-0.0591198	-0.00846964	-0.182008	2.56667	-486
		2.568	-374	2.568	-316	2.568	-261		2.56933	-0.352722	-0.0579973	-0.00833983	-0.17937	2.568	-483
		2.56933	-371	2.56933	-310	2.56933	-257		2.57067	-0.352722	-0.0585585	-0.00833983	-0.178993	2.56933	-476
		2.57067	-371	2.57067	-313	2.57067	-257		2.572	-0.342264	-0.059494	-0.00846964	-0.185399	2.57067	-475
		2.572	-360	2.572	-318	2.572	-261		2.57333	-0.351771	-0.059494	-0.00853454	-0.183892	2.572	-492
		2.57333	-370	2.57333	-318	2.57333	-263		2.57467	-0.352722	-0.0587456	-0.00869679	-0.181254	2.57333	-488
		2.57467	-371	2.57467	-314	2.57467	-268		2.576	-0.347968	-0.0566876	-0.00892395	-0.180501	2.57467	-481
		2.576	-366	2.576	-303	2.576	-275		2.57733	-0.354623	-0.0589327	-0.00869679	-0.180501	2.576	-479
		2.57733	-373	2.57733	-315	2.57733	-268		2.57867	-0.356525	-0.0606165	-0.00872924	-0.178993	2.57733	-479
		2.57867	-375	2.57867	-324	2.57867	-269		2.58	-0.353673	-0.0598681	-0.00853454	-0.178993	2.57867	-475
		2.58	-372	2.58	-320	2.58	-263		2.58133	-0.35082	-0.059494	-0.00808023	-0.181631	2.58	-475
		2.58133	-369	2.58133	-318	2.58133	-249		2.58267	-0.354623	-0.0596811	-0.00846964	-0.178617	2.58133	-482
		2.58267	-373	2.58267	-319	2.58267	-261		2.584	-0.360328	-0.0598681	-0.00840474	-0.179747	2.58267	-474
		2.584	-379	2.584	-320	2.584	-259		2.58533	-0.359377	-0.0600552	-0.00821003	-0.182762	2.584	-477
		2.58533	-378	2.58533	-321	2.58533	-253		2.58667	-0.352722	-0.059494	-0.00821003	-0.183892	2.58533	-485
		2.58667	-371	2.58667	-318	2.58667	-253		2.588	-0.356525	-0.0587456	-0.0088266	-0.183515	2.58667	-488
		2.588	-375	2.588	-314	2.588	-272		2.58933	-0.344165	-0.0579973	-0.00898885	-0.185023	2.588	-487
		2.58933	-362	2.58933	-310	2.58933	-277		2.59067	-0.33751	-0.0566876	-0.0088266	-0.185776	2.58933	-491
		2.59067	-355	2.59067	-303	2.59067	-272		2.592	-0.347018	-0.0598681	-0.00863189	-0.179747	2.59067	-493
		2.592	-365	2.592	-320	2.592	-266		2.59333	-0.347018	-0.0626745	-0.0089564	-0.182762	2.592	-477
		2.59333	-365	2.59333	-335	2.59333	-276		2.59467	-0.356525	-0.0636099	-0.00892395	-0.182762	2.59333	-485
		2.59467	-375	2.59467	-340	2.59467	-275		2.596	-0.365081	-0.0606165	-0.00872924	-0.180877	2.59467	-485
		2.596	-384	2.596	-324	2.596	-269		2.59733	-0.361279	-0.0598681	-0.00859944	-0.183515	2.596	-480
		2.59733	-380	2.59733	-320	2.59733	-265		2.59867	-0.352722	-0.0604294	-0.00872924	-0.181631	2.59733	-487
		2.59867	-371	2.59867	-323	2.59867	-269		2.6	-0.347018	-0.0609907	-0.00859944	-0.180877	2.59867	-482
		2.6	-365	2.6	-326	2.6	-265		2.60133	-0.344165	-0.0609907	-0.00840474	-0.181631	2.6	-480
		2.60133	-362	2.60133	-326	2.60133	-259		2.60267	-0.344165	-0.0624874	-0.00869679	-0.179747	2.60133	-482
		2.60267	-362	2.60267	-334	2.60267	-268		2.604	-0.357476	-0.0621132	-0.0090862	-0.183138	2.60267	-477
		2.604	-376	2.604	-332	2.604	-280		2.60533	-0.366983	-0.0606165	-0.00905375	-0.182762	2.604	-486
		2.60533	-386	2.60533	-324	2.60533	-279		2.60667	-0.366983	-0.0613648	-0.00885905	-0.177109	2.60533	-485
		2.60667	-386	2.60667	-328	2.60667	-273		2.608	-0.345116	-0.0602423	-0.00898885	-0.179747	2.60667	-470
		2.608	-363	2.608	-322	2.608	-277		2.60933	-0.340362	-0.0600552	-0.00918355	-0.181631	2.608	-477
		2.60933	-358	2.60933	-321	2.60933	-283		2.61067	-0.338461	-0.0609907	-0.009216	-0.180501	2.60933	-482
		2.61067	-356	2.61067	-326	2.61067	-284		2.612	-0.339412	-0.0609907	-0.00911865	-0.177486	2.61067	-479
		2.612	-357	2.612	-326	2.612	-281		2.61333	-0.35082	-0.0611778	-0.00885905	-0.180124	2.612	-471
		2.61333	-369	2.61333	-327	2.61333	-273		2.61467	-0.346067	-0.0600552	-0.0089564	-0.181631	2.61333	-478
		2.61467	-364	2.61467	-321	2.61467	-276		2.616	-0.345116	-0.0576231	-0.00892395	-0.182008	2.61467	-482
		2.616	-363	2.616	-308	2.616	-275		2.61733	-0.35082	-0.057436	-0.00876169	-0.179747	2.616	-483
		2.61733	-369	2.61733	-307	2.61733	-270		2.61867	-0.356525	-0.0598681	-0.00941071	-0.182762	2.61733	-477
		2.61867	-375	2.61867	-320	2.61867	-290		2.62	-0.362229	-0.0608036	-0.00957296	-0.183138	2.61867	-485
		2.62	-381	2.62	-325	2.62	-295		2.62133	-0.364131	-0.0589327	-0.00950806	-0.182385	2.62	-486
		2.62133	-383	2.62133	-315	2.62133	-293		2.62267	-0.361279	-0.0606165	-0.00937826	-0.183515	2.62133	-484
		2.62267	-380	2.62267	-324	2.62267	-289		2.624	-0.34987	-0.0611778	-0.00918355	-0.183138	2.62267	-487
		2.624	-368	2.624	-327	2.624	-283		2.62533	-0.356525	-0.0611778	-0.009216	-0.180124	2.624	-486
		2.62533	-375	2.62533	-327	2.62533	-284		2.62667	-0.364131	-0.0613648	-0.00931336	-0.176356	2.62533	-478
		2.62667	-383	2.62667	-328	2.62667	-287		2.628	-0.362229	-0.0606165	-0.00934581	-0.175225	2.62667	-468
		2.628	-381	2.628	-324	2.628	-288		2.62933	-0.367934	-0.0602423	-0.00941071	-0.176356	2.628	-465
		2.62933	-387	2.62933	-322	2.62933	-290		2.63067	-0.364131	-0.0598681	-0.00934581	-0.176356	2.62933	-468
		2.63067	-383	2.63067	-320	2.63067	-288		2.632	-0.358426	-0.0591198	-0.00934581	-0.175602	2.63067	-468
		2.632	-377	2.632	-316	2.632	-288		2.63333	-0.358426	-0.0593069	-0.00963786	-0.177109	2.632	-466
		2.63333	-377	2.63333	-317	2.63333	-297		2.63467	-0.361279	-0.0598681	-0.0091511	-0.180501	2.63333	-470
		2.63467	-380	2.63467	-320	2.63467	-282		2.636	-0.358426	-0.0609907	-0.0090213	-0.179747	2.63467	-479
		2.636	-377	2.636	-326	2.636	-278		2.63733	-0.359377	-0.0626745	-0.00918355	-0.176356	2.636	-477
		2.63733	-378	2.63733	-335	2.63733	-283		2.63867	-0.373638	-0.0604294	-0.00937826	-0.180124	2.63733	-468
		2.63867	-393	2.63867	-323	2.63867	-289		2.64	-0.359377	-0.0587456	-0.00941071	-0.179747	2.63867	-478
		2.64	-378	2.64	-314	2.64	-290		2.64133	-0.364131	-0.0587456	-0.0091511	-0.181631	2.64	-477
		2.64133	-383	2.64133	-314	2.64133	-282		2.64267	-0.37554	-0.0604294	-0.00885905	-0.18766	2.64133	-482
		2.64267	-395	2.64267	-323	2.64267	-273		2.644	-0.369835	-0.0602423	-0.00924845	-0.189168	2.64267	-498
		2.644	-389	2.644	-322	2.644	-285		2.64533	-0.360328	-0.0600552	-0.00924845	-0.188414	2.644	-502
		2.64533	-379	2.64533	-321	2.64533	-285		2.64667	-0.355574	-0.0602423	-0.00905375	-0.185023	2.64533	-500
		2.64667	-374	2.64667	-322	2.64667	-279		2.648	-0.356525	-0.0619261	-0.0088266	-0.17824	2.64667	-491
		2.648	-375	2.648	-331	2.648	-272		2.64933	-0.361279	-0.061739	-0.00859944	-0.177109	2.648	-473
		2.64933	-380	2.64933	-330	2.64933	-265		2.65067	-0.358426	-0.0613648	-0.00866434	-0.180501	2.64933	-470
		2.65067	-377	2.65067	-328	2.65067	-267		2.652	-0.362229	-0.0615519	-0.00879414	-0.183515	2.65067	-479
		2.652	-381	2.652	-329	2.652	-271		2.65333	-0.37554	-0.0611778	-0.00892395	-0.182008	2.652	-487
		2.65333	-395	2.65333	-327	2.65333	-275		2.65467	-0.377441	-0.0593069	-0.0088915	-0.181254	2.65333	-483
		2.65467	-397	2.65467	-317	2.65467	-274		2.656	-0.368884	-0.0587456	-0.00885905	-0.182762	2.65467	-481
		2.656	-388	2.656	-314	2.656	-273		2.65733	-0.364131	-0.0609907	-0.0088915	-0.182008	2.656	-485
		2.65733	-383	2.65733	-326	2.65733	-274		2.65867	-0.366032	-0.0621132	-0.0090862	-0.176732	2.65733	-483
		2.65867	-385	2.65867	-332	2.65867	-280		2.66	-0.368884	-0.0606165	-0.00898885	-0.179747	2.65867	-469
		2.66	-388	2.66	-324	2.66	-277		2.66133	-0.369835	-0.059494	-0.009216	-0.181254	2.66	-477
		2.66133	-389	2.66133	-318	2.66133	-284		2.66267	-0.367934	-0.0604294	-0.00941071	-0.180877	2.66133	-481
		2.66267	-387	2.66267	-323	2.66267	-290		2.664	-0.36318	-0.0570618	-0.0091511	-0.180877	2.66267	-480
		2.664	-382	2.664	-305	2.664	-282		2.66533	-0.366032	-0.0565006	-0.00898885	-0.184646	2.664	-480
		2.66533	-385	2.66533	-302	2.66533	-277		2.66667	-0.370786	-0.057436	-0.0088915	-0.188037	2.66533	-490
		2.66667	-390	2.66667	-307	2.66667	-274		2.668	-0.370786	-0.057436	-0.0088266	-0.189545	2.66667	-499
		2.668	-390	2.668	-307	2.668	-272		2.66933	-0.36318	-0.0583714	-0.00885905	-0.188791	2.668	-503
		2.66933	-382	2.66933	-312	2.66933	-273		2.67067	-0.358426	-0.0593069	-0.00941071	-0.191429	2.66933	-501
		2.67067	-377	2.67067	-317	2.67067	-290		2.672	-0.361279	-0.0611778	-0.00954051	-0.189921	2.67067	-508
		2.672	-380	2.672	-327	2.672	-294		2.67333	-0.365081	-0.0643583	-0.00941071	-0.184269	2.672	-504
		2.67333	-384	2.67333	-344	2.67333	-290		2.67467	-0.361279	-0.0643583	-0.00947561	-0.184646	2.67333	-489
		2.67467	-380	2.67467	-344	2.67467	-292		2.676	-0.367934	-0.0632357	-0.00944316	-0.185776	2.67467	-490
		2.676	-387	2.676	-338	2.676	-291		2.67733	-0.371737	-0.0619261	-0.00934581	-0.185023	2.676	-493
		2.67733	-391	2.67733	-331	2.67733	-288		2.67867	-0.369835	-0.0611778	-0.00911865	-0.183515	2.67733	-491
		2.67867	-389	2.67867	-327	2.67867	-281		2.68	-0.360328	-0.0623003	-0.00866434	-0.186907	2.67867	-487
		2.68	-379	2.68	-333	2.68	-267		2.68133	-0.359377	-0.0624874	-0.00853454	-0.184269	2.68	-496
		2.68133	-378	2.68133	-334	2.68133	-263		2.68267	-0.365081	-0.0615519	-0.00892395	-0.183892	2.68133	-489
		2.68267	-384	2.68267	-329	2.68267	-275		2.684	-0.371737	-0.0624874	-0.00970276	-0.190298	2.68267	-488
		2.684	-391	2.684	-334	2.684	-299		2.68533	-0.372687	-0.0624874	-0.00986502	-0.191429	2.684	-505
		2.68533	-392	2.68533	-334	2.68533	-304		2.68667	-0.367934	-0.0621132	-0.00947561	-0.19482	2.68533	-508
		2.68667	-387	2.68667	-332	2.68667	-292		2.688	-0.365081	-0.0611778	-0.0090862	-0.196704	2.68667	-517
		2.688	-384	2.688	-327	2.688	-280		2.68933	-0.365081	-0.0611778	-0.0088915	-0.19369	2.688	-522
		2.68933	-384	2.68933	-327	2.68933	-274		2.69067	-0.366983	-0.061739	-0.00898885	-0.190675	2.68933	-514
		2.69067	-386	2.69067	-330	2.69067	-277		2.692	-0.369835	-0.0623003	-0.00934581	-0.189921	2.69067	-506
		2.692	-389	2.692	-333	2.692	-288		2.69333	-0.368884	-0.0630486	-0.00954051	-0.190298	2.692	-504
		2.69333	-388	2.69333	-337	2.69333	-294		2.69467	-0.365081	-0.0623003	-0.00934581	-0.191052	2.69333	-505
		2.69467	-384	2.69467	-333	2.69467	-288		2.696	-0.371737	-0.0619261	-0.009216	-0.192559	2.69467	-507
		2.696	-391	2.696	-331	2.696	-284		2.69733	-0.362229	-0.0623003	-0.00931336	-0.192559	2.696	-511
		2.69733	-381	2.69733	-333	2.69733	-287		2.69867	-0.357476	-0.0639841	-0.00947561	-0.191052	2.69733	-511
		2.69867	-376	2.69867	-342	2.69867	-292		2.7	-0.365081	-0.0645453	-0.00950806	-0.187284	2.69867	-507
		2.7	-384	2.7	-345	2.7	-293		2.70133	-0.357476	-0.0652937	-0.00950806	-0.188791	2.7	-497
		2.70133	-376	2.70133	-349	2.70133	-293		2.70267	-0.36318	-0.0652937	-0.00941071	-0.189168	2.70133	-501
		2.70267	-382	2.70267	-349	2.70267	-290		2.704	-0.367934	-0.0630486	-0.00931336	-0.188414	2.70267	-502
		2.704	-387	2.704	-337	2.704	-287		2.70533	-0.361279	-0.0626745	-0.00931336	-0.189921	2.704	-500
		2.70533	-380	2.70533	-335	2.70533	-287		2.70667	-0.365081	-0.0624874	-0.00934581	-0.191052	2.70533	-504
		2.70667	-384	2.70667	-334	2.70667	-288		2.708	-0.366032	-0.0619261	-0.00918355	-0.192936	2.70667	-507
		2.708	-385	2.708	-331	2.708	-283		2.70933	-0.365081	-0.0611778	-0.00892395	-0.194443	2.708	-512
		2.70933	-384	2.70933	-327	2.70933	-275		2.71067	-0.362229	-0.0624874	-0.00869679	-0.189545	2.70933	-516
		2.71067	-381	2.71067	-334	2.71067	-268		2.712	-0.360328	-0.0641712	-0.0088266	-0.190298	2.71067	-503
		2.712	-379	2.712	-343	2.712	-272		2.71333	-0.358426	-0.0654808	-0.00905375	-0.190298	2.712	-505
		2.71333	-377	2.71333	-350	2.71333	-279		2.71467	-0.357476	-0.0656679	-0.00924845	-0.18653	2.71333	-505
		2.71467	-376	2.71467	-351	2.71467	-285		2.716	-0.354623	-0.0651066	-0.00924845	-0.181254	2.71467	-495
		2.716	-373	2.716	-348	2.716	-285		2.71733	-0.360328	-0.0652937	-0.00918355	-0.183138	2.716	-481
		2.71733	-379	2.71733	-349	2.71733	-283		2.71867	-0.364131	-0.065855	-0.009216	-0.188037	2.71733	-486
		2.71867	-383	2.71867	-352	2.71867	-284		2.72	-0.362229	-0.0641712	-0.00931336	-0.192559	2.71867	-499
		2.72	-381	2.72	-343	2.72	-287		2.72133	-0.342264	-0.0654808	-0.00944316	-0.194066	2.72	-511
		2.72133	-360	2.72133	-350	2.72133	-291		2.72267	-0.352722	-0.0664162	-0.00967031	-0.194443	2.72133	-515
		2.72267	-371	2.72267	-355	2.72267	-298		2.724	-0.359377	-0.066042	-0.00963786	-0.192936	2.72267	-516
		2.724	-378	2.724	-353	2.724	-297		2.72533	-0.355574	-0.0649195	-0.00934581	-0.188414	2.724	-512
		2.72533	-374	2.72533	-347	2.72533	-288		2.72667	-0.357476	-0.0652937	-0.00967031	-0.189168	2.72533	-500
		2.72667	-376	2.72667	-349	2.72667	-298		2.728	-0.360328	-0.0645453	-0.00947561	-0.189168	2.72667	-502
		2.728	-379	2.728	-345	2.728	-292		2.72933	-0.36318	-0.0621132	-0.00928091	-0.188414	2.728	-502
		2.72933	-382	2.72933	-332	2.72933	-286		2.73067	-0.365081	-0.0641712	-0.00941071	-0.186907	2.72933	-500
		2.73067	-384	2.73067	-343	2.73067	-290		2.732	-0.366032	-0.0664162	-0.00911865	-0.18653	2.73067	-496
		2.732	-385	2.732	-355	2.732	-281		2.73333	-0.361279	-0.0681	-0.00892395	-0.188037	2.732	-495
		2.73333	-380	2.73333	-364	2.73333	-275		2.73467	-0.357476	-0.0684742	-0.00892395	-0.191805	2.73333	-499
		2.73467	-376	2.73467	-366	2.73467	-275		2.736	-0.358426	-0.0684742	-0.00898885	-0.197835	2.73467	-509
		2.736	-377	2.736	-366	2.736	-277		2.73733	-0.362229	-0.0654808	-0.0089564	-0.199719	2.736	-525
		2.73733	-381	2.73733	-350	2.73733	-276		2.73867	-0.359377	-0.0624874	-0.00905375	-0.197081	2.73733	-530
		2.73867	-378	2.73867	-334	2.73867	-279		2.74	-0.358426	-0.0632357	-0.00924845	-0.191429	2.73867	-523
		2.74	-377	2.74	-338	2.74	-285		2.74133	-0.36318	-0.0645453	-0.00954051	-0.18766	2.74	-508
		2.74133	-382	2.74133	-345	2.74133	-294		2.74267	-0.366983	-0.0666033	-0.00950806	-0.190298	2.74133	-498
		2.74267	-386	2.74267	-356	2.74267	-293		2.744	-0.359377	-0.0681	-0.00934581	-0.190675	2.74267	-505
		2.744	-378	2.744	-364	2.744	-288		2.74533	-0.351771	-0.0664162	-0.00934581	-0.187284	2.744	-506
		2.74533	-370	2.74533	-355	2.74533	-288		2.74667	-0.361279	-0.0675387	-0.00992992	-0.188037	2.74533	-497
		2.74667	-380	2.74667	-361	2.74667	-306		2.748	-0.355574	-0.0671646	-0.00963786	-0.188414	2.74667	-499
		2.748	-374	2.748	-359	2.748	-297		2.74933	-0.348919	-0.0656679	-0.00931336	-0.188791	2.748	-500
		2.74933	-367	2.74933	-351	2.74933	-287		2.75067	-0.346067	-0.0656679	-0.0091511	-0.188037	2.74933	-501
		2.75067	-364	2.75067	-351	2.75067	-282		2.752	-0.35082	-0.0652937	-0.00928091	-0.183515	2.75067	-499
		2.752	-369	2.752	-349	2.752	-286		2.75333	-0.345116	-0.0652937	-0.00973522	-0.182385	2.752	-487
		2.75333	-363	2.75333	-349	2.75333	-300		2.75467	-0.347018	-0.0654808	-0.00983257	-0.183515	2.75333	-484
		2.75467	-365	2.75467	-350	2.75467	-303		2.756	-0.354623	-0.0654808	-0.00957296	-0.185399	2.75467	-487
		2.756	-373	2.756	-350	2.756	-295		2.75733	-0.347018	-0.0666033	-0.00954051	-0.186153	2.756	-492
		2.75733	-365	2.75733	-356	2.75733	-294		2.75867	-0.347018	-0.0671646	-0.00973522	-0.18653	2.75733	-494
		2.75867	-365	2.75867	-359	2.75867	-300		2.76	-0.347968	-0.0667904	-0.00973522	-0.186907	2.75867	-495
		2.76	-366	2.76	-357	2.76	-300		2.76133	-0.348919	-0.0666033	-0.00941071	-0.18766	2.76	-496
		2.76133	-367	2.76133	-356	2.76133	-290		2.76267	-0.357476	-0.0669775	-0.0091511	-0.191429	2.76133	-498
		2.76267	-376	2.76267	-358	2.76267	-282		2.764	-0.360328	-0.066042	-0.0090862	-0.192182	2.76267	-508
		2.764	-379	2.764	-353	2.764	-280		2.76533	-0.358426	-0.063797	-0.00924845	-0.191429	2.764	-510
		2.76533	-377	2.76533	-341	2.76533	-285		2.76667	-0.355574	-0.0656679	-0.00954051	-0.191052	2.76533	-508
		2.76667	-374	2.76667	-351	2.76667	-294		2.768	-0.354623	-0.065855	-0.00931336	-0.187284	2.76667	-507
		2.768	-373	2.768	-352	2.768	-287		2.76933	-0.353673	-0.0651066	-0.00950806	-0.186153	2.768	-497
		2.76933	-372	2.76933	-348	2.76933	-293		2.77067	-0.356525	-0.0651066	-0.00973522	-0.186153	2.76933	-494
		2.77067	-375	2.77067	-348	2.77067	-300		2.772	-0.365081	-0.0652937	-0.00947561	-0.185776	2.77067	-494
		2.772	-384	2.772	-349	2.772	-292		2.77333	-0.358426	-0.0632357	-0.00973522	-0.191805	2.772	-493
		2.77333	-377	2.77333	-338	2.77333	-300		2.77467	-0.358426	-0.0615519	-0.00970276	-0.189921	2.77333	-509
		2.77467	-377	2.77467	-329	2.77467	-299		2.776	-0.365081	-0.0630486	-0.00950806	-0.183515	2.77467	-504
		2.776	-384	2.776	-337	2.776	-293		2.77733	-0.373638	-0.0636099	-0.00950806	-0.185023	2.776	-487
		2.77733	-393	2.77733	-340	2.77733	-293		2.77867	-0.368884	-0.0639841	-0.00950806	-0.188791	2.77733	-491
		2.77867	-388	2.77867	-342	2.77867	-293		2.78	-0.358426	-0.0639841	-0.00944316	-0.189921	2.77867	-501
		2.78	-377	2.78	-342	2.78	-291		2.78133	-0.35082	-0.063797	-0.00937826	-0.189921	2.78	-504
		2.78133	-369	2.78133	-341	2.78133	-289		2.78267	-0.351771	-0.0651066	-0.00934581	-0.194066	2.78133	-504
		2.78267	-370	2.78267	-348	2.78267	-288		2.784	-0.359377	-0.0662291	-0.00980012	-0.197081	2.78267	-515
		2.784	-378	2.784	-354	2.784	-302		2.78533	-0.36318	-0.0669775	-0.00980012	-0.19482	2.784	-523
		2.78533	-382	2.78533	-358	2.78533	-302		2.78667	-0.365081	-0.065855	-0.00950806	-0.188037	2.78533	-517
		2.78667	-384	2.78667	-352	2.78667	-293		2.788	-0.370786	-0.0667904	-0.00957296	-0.18766	2.78667	-499
		2.788	-390	2.788	-357	2.788	-295		2.78933	-0.36318	-0.0677258	-0.00989747	-0.189921	2.788	-498
		2.78933	-382	2.78933	-362	2.78933	-305		2.79067	-0.347968	-0.0677258	-0.00989747	-0.192559	2.78933	-504
		2.79067	-366	2.79067	-362	2.79067	-305		2.792	-0.332757	-0.0673517	-0.00954051	-0.194066	2.79067	-511
		2.792	-350	2.792	-360	2.792	-294		2.79333	-0.33751	-0.0690354	-0.00931336	-0.188037	2.792	-515
		2.79333	-355	2.79333	-369	2.79333	-287		2.79467	-0.338461	-0.0697838	-0.00928091	-0.185023	2.79333	-499
		2.79467	-356	2.79467	-373	2.79467	-286		2.796	-0.344165	-0.0682871	-0.00924845	-0.185023	2.79467	-491
		2.796	-362	2.796	-365	2.796	-285		2.79733	-0.353673	-0.066042	-0.0091511	-0.18766	2.796	-491
		2.79733	-372	2.79733	-353	2.79733	-282		2.79867	-0.35082	-0.0667904	-0.00931336	-0.188414	2.79733	-498
		2.79867	-369	2.79867	-357	2.79867	-287		2.8	-0.345116	-0.0667904	-0.00947561	-0.188791	2.79867	-500
		2.8	-363	2.8	-357	2.8	-292		2.80133	-0.346067	-0.0639841	-0.00954051	-0.188791	2.8	-501
		2.80133	-364	2.80133	-342	2.80133	-294		2.80267	-0.353673	-0.0634228	-0.00950806	-0.189545	2.80133	-501
		2.80267	-372	2.80267	-339	2.80267	-293		2.804	-0.345116	-0.0628615	-0.00954051	-0.190298	2.80267	-503
		2.804	-363	2.804	-336	2.804	-294		2.80533	-0.348919	-0.0634228	-0.00980012	-0.191052	2.804	-505
		2.80533	-367	2.80533	-339	2.80533	-302		2.80667	-0.357476	-0.0667904	-0.00989747	-0.192182	2.80533	-507
		2.80667	-376	2.80667	-357	2.80667	-305		2.808	-0.366032	-0.0654808	-0.00954051	-0.195197	2.80667	-510
		2.808	-385	2.808	-350	2.808	-294		2.80933	-0.356525	-0.0651066	-0.00928091	-0.192182	2.808	-518
		2.80933	-375	2.80933	-348	2.80933	-286		2.81067	-0.348919	-0.0654808	-0.00937826	-0.189921	2.80933	-510
		2.81067	-367	2.81067	-350	2.81067	-289		2.812	-0.345116	-0.0652937	-0.00960541	-0.188037	2.81067	-504
		2.812	-363	2.812	-349	2.812	-296		2.81333	-0.343215	-0.0634228	-0.00970276	-0.186907	2.812	-499
		2.81333	-361	2.81333	-339	2.81333	-299		2.81467	-0.340362	-0.0639841	-0.00934581	-0.185023	2.81333	-496
		2.81467	-358	2.81467	-342	2.81467	-288		2.816	-0.34987	-0.065855	-0.00941071	-0.186153	2.81467	-491
		2.816	-368	2.816	-352	2.816	-290		2.81733	-0.361279	-0.0654808	-0.00967031	-0.191052	2.816	-494
		2.81733	-380	2.81733	-350	2.81733	-298		2.81867	-0.36318	-0.0682871	-0.00944316	-0.194066	2.81733	-507
		2.81867	-382	2.81867	-365	2.81867	-291		2.82	-0.347968	-0.0705322	-0.00976767	-0.190675	2.81867	-515
		2.82	-366	2.82	-377	2.82	-301		2.82133	-0.342264	-0.0710934	-0.00957296	-0.190298	2.82	-506
		2.82133	-360	2.82133	-380	2.82133	-295		2.82267	-0.346067	-0.0697838	-0.00905375	-0.195574	2.82133	-505
		2.82267	-364	2.82267	-373	2.82267	-279		2.824	-0.359377	-0.0681	-0.00944316	-0.197081	2.82267	-519
		2.824	-378	2.824	-364	2.824	-291		2.82533	-0.34987	-0.0667904	-0.00918355	-0.195197	2.824	-523
		2.82533	-368	2.82533	-357	2.82533	-283		2.82667	-0.347018	-0.0656679	-0.00944316	-0.195197	2.82533	-518
		2.82667	-365	2.82667	-351	2.82667	-291		2.828	-0.351771	-0.066042	-0.0102869	-0.199719	2.82667	-518
		2.828	-370	2.828	-353	2.828	-317		2.82933	-0.353673	-0.0686613	-0.010222	-0.196327	2.828	-530
		2.82933	-372	2.82933	-367	2.82933	-315		2.83067	-0.347968	-0.0699709	-0.0100597	-0.194066	2.82933	-521
		2.83067	-366	2.83067	-374	2.83067	-310		2.832	-0.35082	-0.0694096	-0.00986502	-0.191805	2.83067	-515
		2.832	-369	2.832	-371	2.832	-304		2.83333	-0.362229	-0.0692225	-0.00950806	-0.18766	2.832	-509
		2.83333	-381	2.83333	-370	2.83333	-293		2.83467	-0.367934	-0.0681	-0.00928091	-0.18766	2.83333	-498
		2.83467	-387	2.83467	-364	2.83467	-286		2.836	-0.355574	-0.0677258	-0.00957296	-0.189545	2.83467	-498
		2.836	-374	2.836	-362	2.836	-295		2.83733	-0.347018	-0.0681	-0.00983257	-0.192559	2.836	-503
		2.83733	-365	2.83733	-364	2.83733	-303		2.83867	-0.348919	-0.0669775	-0.00989747	-0.198212	2.83733	-511
		2.83867	-367	2.83867	-358	2.83867	-305		2.84	-0.351771	-0.0656679	-0.00983257	-0.198965	2.83867	-526
		2.84	-370	2.84	-351	2.84	-303		2.84133	-0.343215	-0.0651066	-0.00980012	-0.199719	2.84	-528
		2.84133	-361	2.84133	-348	2.84133	-302		2.84267	-0.33751	-0.065855	-0.00992992	-0.199342	2.84133	-530
		2.84267	-355	2.84267	-352	2.84267	-306		2.844	-0.340362	-0.0699709	-0.0103193	-0.195574	2.84267	-529
		2.844	-358	2.844	-374	2.844	-318		2.84533	-0.340362	-0.0712805	-0.0102869	-0.192182	2.844	-519
		2.84533	-358	2.84533	-381	2.84533	-317		2.84667	-0.351771	-0.0709063	-0.0101895	-0.192936	2.84533	-510
		2.84667	-370	2.84667	-379	2.84667	-314		2.848	-0.360328	-0.0694096	-0.00999482	-0.195951	2.84667	-512
		2.848	-379	2.848	-371	2.848	-308		2.84933	-0.354623	-0.0697838	-0.00960541	-0.19369	2.848	-520
		2.84933	-373	2.84933	-373	2.84933	-296		2.85067	-0.335609	-0.0707192	-0.00989747	-0.195951	2.84933	-514
		2.85067	-353	2.85067	-378	2.85067	-305		2.852	-0.335609	-0.0716547	-0.00989747	-0.195951	2.85067	-520
		2.852	-353	2.852	-383	2.852	-305		2.85333	-0.345116	-0.0718418	-0.00976767	-0.193313	2.852	-520
		2.85333	-363	2.85333	-384	2.85333	-301		2.85467	-0.34987	-0.0714676	-0.00999482	-0.192936	2.85333	-513
		2.85467	-368	2.85467	-382	2.85467	-308		2.856	-0.354623	-0.070158	-0.0100922	-0.187284	2.85467	-512
		2.856	-373	2.856	-375	2.856	-311		2.85733	-0.351771	-0.0682871	-0.0100597	-0.185023	2.856	-497
		2.85733	-370	2.85733	-365	2.85733	-310		2.85867	-0.345116	-0.0684742	-0.00996237	-0.188791	2.85733	-491
		2.85867	-363	2.85867	-366	2.85867	-307		2.86	-0.341313	-0.0671646	-0.00996237	-0.193313	2.85867	-501
		2.86	-359	2.86	-359	2.86	-307		2.86133	-0.338461	-0.0675387	-0.00967031	-0.192182	2.86	-513
		2.86133	-356	2.86133	-361	2.86133	-298		2.86267	-0.339412	-0.0695967	-0.00957296	-0.189168	2.86133	-510
		2.86267	-357	2.86267	-372	2.86267	-295		2.864	-0.339412	-0.0695967	-0.00970276	-0.18653	2.86267	-502
[truncated: 9,111 more rows]
