# Supplementary material for: Structural, mechanistic, and physiological insights into phospholipase A-mediated membrane phospholipid degradation in Pseudomonas aeruginosa
Source: eLife. 2022 May 10;11:e72824. doi: 10.7554/eLife.72824 (PMC9132575; doi:10.7554/eLife.72824)
Supplement: Figure 6—source data 1. [file elife-72824-fig6-data1.xlsx]

## Sheet: Figure 6a
Wert für 15 mM FS	rel. Aktivität	STABW [%]
PlbF ohne	100	1.51908
C5	89.913	2.27111
C6	89.5645	0.979226
C7	86.6023	0.2
C8	94.9804	2.65876
C9	48.9401	2.83322
C10	25.7424	3.25918
C11	15.0673	3.05661
C12	9.82118	6.54388
C13	8.54853	3.52506
C14	25.0538	4.78958
C15	58.656	2.23935
C10:1	23.9124	2.29592
	Zeit 0
	1	2	3	4	5	6	7	8	9	10	11	12
A	0.052	0.05	0.051	0.196	0.206	0.212	0.206	0.212	0.219	0.05	0.051	0.05		0.052	0.05	0.051	0.196	0.206	0.212	0.206	0.212	0.219	0.05	0.051	0.05
B	0.163	0.173	0.184	0.199	0.204	0.215	0.051	0.051	0.051	0.05	0.051	0.05		0.163	0.173	0.184	0.199	0.204	0.215	0.051	0.051	0.051	0.05	0.051	0.05
C	0.18	0.191	0.197	0.195	0.203	0.212	0.051	0.051	0.051	0.05	0.05	0.051		0.18	0.191	0.197	0.195	0.203	0.212	0.051	0.051	0.051	0.05	0.05	0.051
D	0.18	0.188	0.197	0.19	0.201	0.208	0.051	0.051	0.05	0.05	0.05	0.049		0.18	0.188	0.197	0.19	0.201	0.208	0.051	0.051	0.05	0.05	0.05	0.049
E	0.179	0.186	0.193	0.192	0.2	0.209	0.05	0.05	0.05	0.049	0.05	0.049		0.179	0.186	0.193	0.192	0.2	0.209	0.05	0.05	0.05	0.049	0.05	0.049
F	0.174	0.183	0.185	0.194	0.201	0.205	0.05	0.05	0.05	0.051	0.049	0.049		0.174	0.183	0.185	0.194	0.201	0.205	0.05	0.05	0.05	0.051	0.049	0.049
G	0.179	0.187	0.191	0.2	0.203	0.212	0.056	0.056	0.055	0.054	0.056	0.058		0.179	0.187	0.191	0.2	0.203	0.212	0.056	0.056	0.055	0.054	0.056	0.058
H	0.112	0.189	0.193	0.194	0.202	0.211	0.054	0.054	0.054	0.052	0.053	0.042		0.112	0.189	0.193	0.194	0.202	0.211	0.054	0.054	0.054	0.052	0.053	0.042
Zeit 120 sec
	1	2	3	4	5	6	7	8	9	10	11	12
A	0.055	0.054	0.055	0.466	0.484	0.483	0.457	0.463	0.47	0.053	0.054	0.053		0.055	0.054	0.055	0.466	0.484	0.483	0.457	0.463	0.47	0.053	0.054	0.053
B	0.425	0.436	0.454	0.476	0.479	0.493	0.055	0.054	0.055	0.054	0.054	0.053		0.425	0.436	0.454	0.476	0.479	0.493	0.055	0.054	0.055	0.054	0.054	0.053
C	0.472	0.486	0.489	0.464	0.475	0.485	0.054	0.054	0.054	0.052	0.053	0.053		0.472	0.486	0.489	0.464	0.475	0.485	0.054	0.054	0.054	0.052	0.053	0.053
D	0.473	0.479	0.488	0.452	0.468	0.473	0.054	0.054	0.054	0.052	0.052	0.052		0.473	0.479	0.488	0.452	0.468	0.473	0.054	0.054	0.054	0.052	0.052	0.052
E	0.471	0.47	0.476	0.456	0.465	0.477	0.054	0.053	0.053	0.053	0.053	0.053		0.471	0.47	0.476	0.456	0.465	0.477	0.054	0.053	0.053	0.053	0.053	0.053
F	0.453	0.462	0.453	0.459	0.469	0.464	0.053	0.053	0.053	0.054	0.051	0.052		0.453	0.462	0.453	0.459	0.469	0.464	0.053	0.053	0.053	0.054	0.051	0.052
G	0.455	0.465	0.46	0.463	0.468	0.466	0.06	0.06	0.06	0.058	0.06	0.061		0.455	0.465	0.46	0.463	0.468	0.466	0.06	0.06	0.06	0.058	0.06	0.061
H	0.248	0.473	0.468	0.452	0.465	0.472	0.057	0.057	0.057	0.054	0.056	0.043		0.248	0.473	0.468	0.452	0.465	0.472	0.057	0.057	0.057	0.054	0.056	0.043
	Differenz
	1	2	3	4	5	6	7	8	9	10	11	12
A	0.003	0.004	0.004	0.27	0.278	0.271	0.251	0.251	0.251	0.003	0.003	0.003
B	0.262	0.263	0.27	0.277	0.275	0.278	0.004	0.003	0.004	0.004	0.003	0.003
C	0.292	0.295	0.292	0.269	0.272	0.273	0.003	0.003	0.003	0.002	0.003	0.002
D	0.293	0.291	0.291	0.262	0.267	0.265	0.003	0.003	0.004	0.002	0.002	0.003
E	0.292	0.284	0.283	0.264	0.265	0.268	0.004	0.003	0.003	0.004	0.003	0.004
F	0.279	0.279	0.268	0.265	0.268	0.259	0.003	0.003	0.003	0.003	0.002	0.003
G	0.276	0.278	0.269	0.263	0.265	0.254	0.004	0.004	0.005	0.004	0.004	0.003
H	0.136	0.284	0.275	0.258	0.263	0.261	0.003	0.003	0.003	0.002	0.003	0.001
	Blank Mittelwert
Blank OG	0.00366667	C5 (7,5 mM)	0.003	C6 (15 mM)	0.00366667
C5 (1 mM)	0.00366667	C6 (7,5 mM)	0.003	C7 (15 mM)	0.0025
C6 (1 mM)	0.003	C7 (7,5 mM)	0.00333333
C7 (1 mM)	0.00333333	C5 (10 mM)	0.00233333
C5 (5 mM)	0.00333333	C6 (10 mM)	0.00233333
C6 (5 mM)	0.003	C7 (10 mM)	0.00366667
C7 (5 mM)	0.00433333	C5 (15 mM)	0.00266667
	Abzug Blank
	1	2	3
PlbF in OG	0.258333	0.259333	0.266333
C5 (1 mM)	0.288333	0.291333	0.288333
C6 (1 mM)	0.29	0.288	0.288
C7 (1 mM)	0.288667	0.280667	0.279667
C5 (5 mM)	0.275667	0.275667	0.264667
C6 (5 mM)	0.273	0.275	0.266
C7 (5 mM)	0.131667	0.279667	0.270667
C5 (7,5 mM)	0.267	0.275	0.268
C6 (7,5 mM)	0.274	0.272	0.275
C7 (7,5 mM)	0.265667	0.268667	0.269667
C5 (10 mM)	0.259667	0.264667	0.262667
C6 (10 mM)	0.261667	0.262667	0.265667
C7 (10 mM)	0.261333	0.264333	0.255333
C5 (15 mM)	0.260333	0.262333	0.251333
C6 (15 mM)	0.254333	0.259333	0.257333
C7 (15 mM)	0.2485	0.2485	0.2485
	Mittelwert Messung		Standardabweichung		PlbF in OG war ohne DMS0, daher faktor von 1,098 bestimmt (separate Messung)
	Delta OD/2min
PlbF in OG	0.286944		0.0043589
C5(1mM)	0.289333		0.00173205
C6(1mM)	0.288667		0.0011547
C7(1mM)	0.283		0.00493288
C5(5mM)	0.272		0.00635085
C6(5mM)	0.271333		0.00472582
C7(5mM)	0.275167		0.00636396
C5(7,5mM)	0.27		0.0043589
C6(7,5mM)	0.273667		0.00152753
C7(7,5mM)	0.268		0.00208167
C5(10mM)	0.262333		0.00251661
C6(10mM)	0.263333		0.00208167
C7(10mM)	0.260333		0.00458258
C5(15mM)	0.258		0.00585947
C6(15mM)	0.257		0.00251661
C7(15mM)	0.2485		3.39935e-17
Relative Aktivität (PlbF ohne FS = 100%)
							Stabw
	1mM	5mM	7,5mM	10mM	15mM		1mM	5mM	7,5mM	10mM	15mM
C5	100.833	94.792	94.095	91.4232	89.913		0.598635	2.33487	1.61441	0.959318	2.27111
C6	100.6	94.5597	95.3728	91.7717	89.5645		0.400012	1.7417	0.55817	0.790506	0.979226
C7	98.6255	95.8956	93.398	90.7262	86.6023		1.74307	2.31277	0.776741	1.76027	1.36795e-14
PlbF ohne FS	100		100
STABW	1.51908
	Zeit 0
	1	2	3	4	5	6	7	8	9	10	11	12
A	0.057	0.055	0.056	0.172	0.18	0.185	0.091	0.093	0.098	0.055	0.055	0.054		0.057	0.055	0.056	0.172	0.18	0.185	0.091	0.093	0.098	0.055	0.055	0.054
B	0.139	0.144	0.153	0.144	0.154	0.159	0.056	0.056	0.056	0.055	0.056	0.055		0.139	0.144	0.153	0.144	0.154	0.159	0.056	0.056	0.056	0.055	0.056	0.055
C	0.147	0.158	0.168	0.114	0.116	0.119	0.056	0.055	0.055	0.056	0.055	0.056		0.147	0.158	0.168	0.114	0.116	0.119	0.056	0.055	0.055	0.056	0.055	0.056
D	0.15	0.157	0.167	0.169	0.173	0.183	0.055	0.056	0.055	0.054	0.055	0.054		0.15	0.157	0.167	0.169	0.173	0.183	0.055	0.056	0.055	0.054	0.055	0.054
E	0.147	0.157	0.165	0.131	0.141	0.144	0.056	0.055	0.055	0.054	0.055	0.054		0.147	0.157	0.165	0.131	0.141	0.144	0.056	0.055	0.055	0.054	0.055	0.054
F	0.149	0.154	0.16	0.104	0.106	0.108	0.055	0.055	0.055	0.056	0.056	0.055		0.149	0.154	0.16	0.104	0.106	0.108	0.055	0.055	0.055	0.056	0.056	0.055
G	0.145	0.148	0.153	0.175	0.183	0.197	0.064	0.064	0.062	0.064	0.063	0.064		0.145	0.148	0.153	0.175	0.183	0.197	0.064	0.064	0.062	0.064	0.063	0.064
H	0.119	0.128	0.131	0.114	0.12	0.12	0.06	0.06	0.059	0.058	0.058	0.057		0.119	0.128	0.131	0.114	0.12	0.12	0.06	0.06	0.059	0.058	0.058	0.057
Zeit 120 sec
	1	2	3	4	5	6	7	8	9	10	11	12
A	0.063	0.062	0.062	0.735	0.737	0.734	0.236	0.24	0.252	0.061	0.06	0.06		0.063	0.062	0.062	0.735	0.737	0.734	0.236	0.24	0.252	0.061	0.06	0.06
B	0.661	0.66	0.673	0.584	0.601	0.606	0.064	0.063	0.063	0.061	0.061	0.06		0.661	0.66	0.673	0.584	0.601	0.606	0.064	0.063	0.063	0.061	0.061	0.06
C	0.722	0.743	0.755	0.41	0.391	0.401	0.063	0.063	0.062	0.063	0.062	0.063		0.722	0.743	0.755	0.41	0.391	0.401	0.063	0.063	0.062	0.063	0.062	0.063
D	0.737	0.727	0.751	0.718	0.703	0.724	0.063	0.063	0.063	0.06	0.06	0.059		0.737	0.727	0.751	0.718	0.703	0.724	0.063	0.063	0.063	0.06	0.06	0.059
E	0.726	0.73	0.731	0.51	0.538	0.528	0.063	0.063	0.062	0.06	0.061	0.059		0.726	0.73	0.731	0.51	0.538	0.528	0.063	0.063	0.062	0.06	0.061	0.059
F	0.728	0.706	0.703	0.344	0.343	0.336	0.063	0.061	0.06	0.063	0.064	0.063		0.728	0.706	0.703	0.344	0.343	0.336	0.063	0.061	0.06	0.063	0.064	0.063
G	0.655	0.634	0.621	0.708	0.719	0.756	0.07	0.07	0.068	0.068	0.068	0.068		0.655	0.634	0.621	0.708	0.719	0.756	0.07	0.07	0.068	0.068	0.068	0.068
H	0.497	0.522	0.508	0.398	0.405	0.391	0.067	0.067	0.066	0.062	0.061	0.061		0.497	0.522	0.508	0.398	0.405	0.391	0.067	0.067	0.066	0.062	0.061	0.061
	Differenz
	1	2	3	4	5	6	7	8	9	10	11	12
A	0.006	0.007	0.006	0.563	0.557	0.549	0.145	0.147	0.154	0.006	0.005	0.006
B	0.522	0.516	0.52	0.44	0.447	0.447	0.008	0.007	0.007	0.006	0.005	0.005
C	0.575	0.585	0.587	0.296	0.275	0.282	0.007	0.008	0.007	0.007	0.007	0.007
D	0.587	0.57	0.584	0.549	0.53	0.541	0.008	0.007	0.008	0.006	0.005	0.005
E	0.579	0.573	0.566	0.379	0.397	0.384	0.007	0.008	0.007	0.006	0.006	0.005
F	0.579	0.552	0.543	0.24	0.237	0.228	0.008	0.006	0.005	0.007	0.008	0.008
G	0.51	0.486	0.468	0.533	0.536	0.559	0.006	0.006	0.006	0.004	0.005	0.004
H	0.378	0.394	0.377	0.284	0.285	0.271	0.007	0.007	0.007	0.004	0.003	0.004
	Blank Mittelwert
Blank OG	0.00633333	C8 (7,5 mM)	0.007	C9 (15 mM)	0.00433333
C8 (1 mM)	0.00733333	C9 (7,5 mM)	0.00566667	C10 (15 mM)	0.00366667
C9 (1 mM)	0.00733333	C10 (7,5 mM)	0.00533333
C10 (1 mM)	0.00766667	C8 (10 mM)	0.007
C8 (5 mM)	0.00733333	C9 (10 mM)	0.00533333
C9 (5 mM)	0.00633333	C10 (10 mM)	0.00566667
C10 (5 mM)	0.006	C8 (15 mM)	0.00766667
	Abzug Blank
	1	2	3
PlbF in OG	0.518333	0.512333	0.516333
C8 (1 mM)	0.571333	0.581333	0.583333
C9 (1 mM)	0.584	0.567	0.581
C10 (1 mM)	0.575667	0.569667	0.562667
C8 (5 mM)	0.575667	0.548667	0.539667
C9 (5 mM)	0.507	0.483	0.465
C10 (5 mM)	0.373667	0.389667	0.372667
C8 (7,5 mM)	0.56	0.554	0.546
C9 (7,5 mM)	0.437	0.444	0.444
C10 (7,5 mM)	0.292667	0.271667	0.278667
C8 (10 mM)	0.546667	0.527667	0.538667
C9 (10 mM)	0.376667	0.394667	0.381667
C10 (10 mM)	0.236333	0.233333	0.224333
C8 (15 mM)	0.530333	0.533333	0.556333
C9 (15 mM)	0.280333	0.281333	0.267333
C10 (15 mM)	0.1425	0.1445	0.1515
	Mittelwert Messung		Standardabweichung		PlbF in OG war ohne DMS0, daher faktor von 1,098 bestimmt (separate Messung)
	Delta OD/2min
PlbF in OG	0.566202		0.00305505
C8(1mM)	0.578667		0.0064291
C9(1mM)	0.577333		0.00907377
C10(1mM)	0.569333		0.00650641
C8(5mM)	0.554667		0.018735
C9(5mM)	0.485		0.0210713
C10(5mM)	0.378667		0.00953939
C8(7,5mM)	0.553333		0.00702377
C9(7,5mM)	0.441667		0.00404145
C10(7,5mM)	0.281		0.0106927
C8(10mM)	0.537667		0.00953939
C9(10mM)	0.384333		0.00929157
C10(10mM)	0.231333		0.006245
C8(15mM)	0.54		0.0142244
C9(15mM)	0.276333		0.00781025
C10(15mM)	0.146167		0.00472582
Relative Aktivität (PlbF ohne FS = 100%)
							Stabw
	1mM	5mM	7,5mM	10mM	15mM		1mM	5mM	7,5mM	10mM	15mM
C8	201.665	193.301	192.837	187.377	188.19		2.22204	6.88787	2.6014	3.63636	5.51333
C9	201.201	169.023	153.921	133.94	96.3022		3.14334	7.76584	1.47678	3.52845	3.03901
C10	198.413	131.965	97.9285	80.6197	50.9391		2.29908	3.46677	3.9898	2.39885	1.90174
PlbF ohne FS	100		100
STABW	1.06469
	Zeit 0
	1	2	3	4	5	6	7	8	9	10	11	12
A	0.053	0.053	0.052	0.131	0.128	0.133	0.07	0.073	0.073	0.054	0.054	0.054		0.053	0.053	0.052	0.131	0.128	0.133	0.07	0.073	0.073	0.054	0.054	0.054
B	0.148	0.154	0.167	0.097	0.101	0.103	0.053	0.053	0.054	0.053	0.053	0.054		0.148	0.154	0.167	0.097	0.101	0.103	0.053	0.053	0.054	0.053	0.053	0.054
C	0.154	0.167	0.179	0.083	0.083	0.085	0.053	0.053	0.053	0.053	0.052	0.052		0.154	0.167	0.179	0.083	0.083	0.085	0.053	0.053	0.053	0.053	0.052	0.052
D	0.145	0.158	0.167	0.105	0.112	0.113	0.053	0.053	0.053	0.051	0.051	0.051		0.145	0.158	0.167	0.105	0.112	0.113	0.053	0.053	0.053	0.051	0.051	0.051
E	0.125	0.131	0.14	0.085	0.087	0.089	0.052	0.052	0.052	0.052	0.052	0.051		0.125	0.131	0.14	0.085	0.087	0.089	0.052	0.052	0.052	0.052	0.052	0.051
F	0.129	0.135	0.146	0.077	0.076	0.077	0.052	0.052	0.052	0.051	0.051	0.051		0.129	0.135	0.146	0.077	0.076	0.077	0.052	0.052	0.052	0.051	0.051	0.051
G	0.105	0.108	0.114	0.086	0.089	0.093	0.059	0.058	0.057	0.06	0.06	0.059		0.105	0.108	0.114	0.086	0.089	0.093	0.059	0.058	0.057	0.06	0.06	0.059
H	0.087	0.091	0.099	0.076	0.078	0.083	0.055	0.055	0.055	0.056	0.056	0.055		0.087	0.091	0.099	0.076	0.078	0.083	0.055	0.055	0.055	0.056	0.056	0.055
Zeit 120 sec
	1	2	3	4	5	6	7	8	9	10	11	12
A	0.06	0.061	0.061	0.44	0.432	0.437	0.124	0.131	0.134	0.059	0.06	0.06		0.06	0.061	0.061	0.44	0.432	0.437	0.124	0.131	0.134	0.059	0.06	0.06
B	0.663	0.653	0.67	0.281	0.287	0.29	0.061	0.06	0.062	0.059	0.059	0.059		0.663	0.653	0.67	0.281	0.287	0.29	0.061	0.06	0.062	0.059	0.059	0.059
C	0.694	0.722	0.736	0.207	0.206	0.207	0.06	0.06	0.06	0.059	0.058	0.057		0.694	0.722	0.736	0.207	0.206	0.207	0.06	0.06	0.06	0.059	0.058	0.057
D	0.637	0.659	0.662	0.33	0.35	0.346	0.06	0.06	0.06	0.056	0.056	0.056		0.637	0.659	0.662	0.33	0.35	0.346	0.06	0.06	0.06	0.056	0.056	0.056
E	0.507	0.494	0.512	0.224	0.23	0.233	0.059	0.059	0.059	0.057	0.057	0.056		0.507	0.494	0.512	0.224	0.23	0.233	0.059	0.059	0.059	0.057	0.057	0.056
F	0.545	0.544	0.556	0.173	0.171	0.172	0.058	0.058	0.058	0.056	0.055	0.055		0.545	0.544	0.556	0.173	0.171	0.172	0.058	0.058	0.058	0.056	0.055	0.055
G	0.355	0.356	0.363	0.218	0.227	0.228	0.066	0.065	0.065	0.065	0.065	0.064		0.355	0.356	0.363	0.218	0.227	0.228	0.066	0.065	0.065	0.065	0.065	0.064
H	0.253	0.254	0.269	0.161	0.168	0.17	0.062	0.062	0.061	0.06	0.06	0.059		0.253	0.254	0.269	0.161	0.168	0.17	0.062	0.062	0.061	0.06	0.06	0.059
	Differenz
	1	2	3	4	5	6	7	8	9	10	11	12
A	0.007	0.008	0.009	0.309	0.304	0.304	0.054	0.058	0.061	0.005	0.006	0.006
B	0.515	0.499	0.503	0.184	0.186	0.187	0.008	0.007	0.008	0.006	0.006	0.005
C	0.54	0.555	0.557	0.124	0.123	0.122	0.007	0.007	0.007	0.006	0.006	0.005
D	0.492	0.501	0.495	0.225	0.238	0.233	0.007	0.007	0.007	0.005	0.005	0.005
E	0.382	0.363	0.372	0.139	0.143	0.144	0.007	0.007	0.007	0.005	0.005	0.005
F	0.416	0.409	0.41	0.096	0.095	0.095	0.006	0.006	0.006	0.005	0.004	0.004
G	0.25	0.248	0.249	0.132	0.138	0.135	0.007	0.007	0.008	0.005	0.005	0.005
H	0.166	0.163	0.17	0.085	0.09	0.087	0.007	0.007	0.006	0.004	0.004	0.004
	Blank Mittelwert
Blank OG	0.008	C10:1 (7,5 mM)	0.00666667	C11 (15 mM)	0.005
C10:1 (1 mM)	0.00766667	C11 (7,5 mM)	0.00566667	C12 (15 mM)	0.004
C11 (1 mM)	0.007	C12 (7,5 mM)	0.00566667
C12 (1 mM)	0.007	C10:1 (10 mM)	0.00566667
C10:1 (5 mM)	0.007	C11 (10 mM)	0.005
C11 (5 mM)	0.006	C12 (10 mM)	0.005
C12 (5 mM)	0.00733333	C10:1 (15 mM)	0.00433333
	Abzug Blank
	1	2	3
PlbF in OG	0.511333	0.495333	0.499333
C10:1 (1 mM)	0.536333	0.551333	0.553333
C11 (1 mM)	0.489	0.498	0.492
C12 (1 mM)	0.378667	0.359667	0.368667
C10:1 (5 mM)	0.412667	0.405667	0.406667
C11 (5 mM)	0.247	0.245	0.246
C12 (5 mM)	0.161667	0.158667	0.165667
C10:1 (7,5 mM)	0.306	0.301	0.301
C11 (7,5 mM)	0.181	0.183	0.184
C12 (7,5 mM)	0.120667	0.119667	0.118667
C10:1 (10 mM)	0.222667	0.235667	0.230667
C11 (10 mM)	0.136667	0.140667	0.141667
C12 (10 mM)	0.0923333	0.0913333	0.0913333
C10:1 (15 mM)	0.129333	0.135333	0.132333
C11 (15 mM)	0.0813333	0.0863333	0.0833333
C12 (15 mM)	0.0515	0.0555	0.0585
					PlbF in OG war ohne DMS0, daher faktor von 1,098 bestimmt (separate Messung)
	Mittelwert Messung		Standardabweichung
	Delta OD/2min
PlbF in OG	0.551196		0.00832666
C10:1 (1 mM)	0.547		0.00929157
C11 (1 mM)	0.493		0.00458258
C12 (1 mM)	0.369		0.00950438
C10:1 (5 mM)	0.408333		0.00378594
C11 (5 mM)	0.246		0.001
C12 (5 mM)	0.162		0.00351188
C10:1 (7,5 mM)	0.302667		0.00288675
C11 (7,5 mM)	0.182667		0.00152753
C12 (7,5 mM)	0.119667		0.001
C10:1 (10 mM)	0.229667		0.00655744
C11 (10 mM)	0.139667		0.00264575
C12 (10 mM)	0.0916667		0.00057735
C10:1 (15 mM)	0.132333		0.003
C11 (15 mM)	0.0836667		0.00251661
C12 (15 mM)	0.0551667		0.00351188
Relative Aktivität (PlbF ohne FS = 100%)
							Stabw
	1mM	5mM	7,5mM	10mM	15mM		1mM	5mM	7,5mM	10mM	15mM
C10:1	190.63	142.304	105.479	80.0388	46.1182		3.21137	1.39189	1.06917	2.49966	1.16279
C11	171.811	85.731	63.6593	48.6738	29.1578		1.5875	0.36855	0.55817	1.00472	0.979226
C12	128.597	56.457	41.7038	31.9458	19.2256		3.35844	1.27628	0.373134	0.221773	1.41323
PlbF ohne FS	100		100
STABW	2.90184
	Zeit 0 (aber nicht unbedingt 0 sec)	jede Messung wurde separat betrachtet da Blank vorallem bei höheren C-Längen die ersten Minuten rum stresst													1	2	3	4	5	6	7	8	9	10	11	12
	1	2	3	4	5	6	7	8	9	10	11	12			0.051	0.05	0.051	0.08	0.083	0.085	0.417	0.476	0.616	0.057	0.057	0.057
A	0.051	0.05	0.051	0.08	0.083	0.085	1.626	1.661	1.698	0.057	0.057	0.057			0.134	0.14	0.147	0.091	0.094	0.098	0.051	0.051	0.051	0.071	0.072	0.078
B	0.134	0.14	0.147	0.091	0.094	0.098	0.051	0.051	0.051	0.75	0.899	0.755			0.107	0.115	0.118	0.114	0.118	0.124	0.05	0.05	0.049	0.054	0.054	0.054
C	0.107	0.115	0.118	1.309	1.258	1.354	0.05	0.05	0.049	0.054	0.054	0.054			0.119	0.127	0.13	0.073	0.074	0.076	0.053	0.053	0.052	0.056	0.057	0.057
D	0.119	0.127	0.13	0.073	0.074	0.076	0.053	0.053	0.052	0.255	0.185	0.286			0.133	0.138	0.144	0.084	0.085	0.087	0.053	0.054	0.053	0.245	0.171	0.221
E	0.133	0.138	0.144	0.738	0.748	0.782	0.053	0.054	0.053	1.01	0.923	0.963			0.081	0.085	0.085	0.131	0.147	0.144	0.055	0.057	0.055	0.056	0.056	0.056
F	0.081	0.085	0.085	1.097	1.208	1.14	0.055	0.057	0.055	0.056	0.056	0.056			0.101	0.106	0.109	0.077	0.077	0.084	0.077	0.068	0.073	0.071	0.065	0.069
G	0.101	0.106	0.109	0.077	0.077	0.084	0.382	0.383	0.208	1.373	1.401	1.367			0.114	0.117	0.122	0.078	0.087	0.082	0.059	0.065	0.06	0.488	0.636	0.801
H	1.602	1.458	1.527	1.439	1.44	1.381	0.059	0.065	0.06	1.381	1.382	1.405
Zeit x (aber 2 min insgesamt)
	1	2	3	4	5	6	7	8	9	10	11	12			0.057	0.057	0.057	0.191	0.198	0.201	1.626	1.661	1.698	0.062	0.062	0.062
A	0.057	0.057	0.057	0.191	0.198	0.201	1.934	1.956	2.002	0.062	0.062	0.062			0.609	0.602	0.614	0.253	0.259	0.263	0.058	0.058	0.057	0.555	0.609	0.546
B	0.609	0.602	0.614	0.253	0.259	0.263	0.058	0.058	0.057	0.758	0.914	0.761			0.423	0.438	0.44	0.67	0.604	0.679	0.057	0.057	0.056	0.058	0.058	0.058
C	0.423	0.438	0.44	1.609	1.56	1.664	0.057	0.057	0.056	0.058	0.058	0.058			0.506	0.513	0.506	0.156	0.159	0.161	0.06	0.06	0.059	0.065	0.07	0.072
D	0.506	0.513	0.506	0.156	0.159	0.161	0.06	0.06	0.059	0.262	0.204	0.285			0.582	0.579	0.581	0.217	0.216	0.223	0.058	0.058	0.058	1.01	0.923	0.963
E	0.582	0.579	0.581	0.862	0.877	0.919	0.058	0.058	0.058	1.025	0.96	0.988			0.233	0.237	0.237	1.097	1.208	1.14	0.06	0.061	0.059	0.064	0.06	0.06
F	0.233	0.237	0.237	1.448	1.554	1.501	0.06	0.061	0.059	0.064	0.06	0.06			0.312	0.323	0.323	0.126	0.127	0.131	0.105	0.107	0.095	1.373	1.401	1.367
G	0.312	0.323	0.323	0.126	0.127	0.131	0.39	0.388	0.226	1.354	1.368	1.338			0.421	0.396	0.413	1.439	1.44	1.381	0.063	0.067	0.063	1.381	1.382	1.405
H	1.854	1.693	1.772	1.567	1.579	1.51	0.063	0.067	0.063	1.393	1.385	1.405
	Differenz
	1	2	3	4	5	6	7	8	9	10	11	12
A	0.006	0.007	0.006	0.111	0.115	0.116	0.308	0.295	0.304	0.005	0.005	0.005
B	0.475	0.462	0.467	0.162	0.165	0.165	0.007	0.007	0.006	0.008	0.015	0.006
C	0.316	0.323	0.322	0.3	0.302	0.31	0.007	0.007	0.007	0.004	0.004	0.004
D	0.387	0.386	0.376	0.083	0.085	0.085	0.007	0.007	0.007	0.007	0.019	-0.001
E	0.449	0.441	0.437	0.124	0.129	0.137	0.005	0.004	0.005	0.015	0.037	0.025
F	0.152	0.152	0.152	0.351	0.346	0.361	0.005	0.004	0.004	0.008	0.004	0.004
G	0.211	0.217	0.214	0.049	0.05	0.047	0.008	0.005	0.018	-0.019	-0.033	-0.029
H	0.252	0.235	0.245	0.128	0.139	0.129	0.004	0.002	0.003	0.012	0.003	0
	Blank Mittelwert
Blank OG	0.00633333	C13 (7,5 mM)	0.003	C14 (15 mM)	0.005		C14 Blank unrealistisch daher den von C15 benutzt (nur bei 15 mM)
C13 (1 mM)	0.00666667	C14 (7,5 mM)	0.005	C15 (15 mM)	0.005
C14 (1 mM)	0.007	C15 (7,5 mM)	0.00966667
C15 (1 mM)	0.007	C13 (10 mM)	0.004
C13 (5 mM)	0.00466667	C14 (10 mM)	0.00833333
C14 (5 mM)	0.00433333	C15 (10 mM)	0.0256667
C15 (5 mM)	0.0065	C13 (15 mM)	0.00533333
	Abzug Blank
	1	2	3
PlbF in OG	0.471333	0.458333	0.463333
C13 (1 mM)	0.312333	0.319333	0.318333
C14(1 mM)	0.384	0.383	0.373
C15 (1 mM)	0.445667	0.437667	0.433667
C13 (5 mM)	0.148667	0.148667	0.148667
C14 (5 mM)	0.208	0.214	0.211
C15 (5 mM)	0.247667	0.230667	0.240667
C13 (7,5 mM)	0.108	0.112	0.113
C14 (7,5 mM)	0.159	0.162	0.162
C15 (7,5 mM)	0.296667	0.298667	0.306667
C13 (10 mM)	0.0806667	0.0826667	0.0826667
C14 (10 mM)	0.121667	0.126667	0.134667
C15 (10 mM)	0.347333	0.342333	0.357333
C13 (15 mM)	0.0463333	0.0473333	0.0443333
C14 (15 mM)	0.124333	0.135333	0.125333
C15 (15 mM)	0.3055	0.2925	0.3015
					PlbF in OG war ohne DMS0, daher faktor von 1,098 bestimmt (separate Messung)
	Mittelwert Messung		Standardabweichung
	Delta OD/2min
PlbF in OG	0.509838		0.00655744
C13 (1 mM)	0.316667		0.00378594
C14(1 mM)	0.38		0.00608276
C15 (1 mM)	0.439		0.0061101
C13 (5 mM)	0.148667		3.92523e-17
C14 (5 mM)	0.211		0.003
C15 (5 mM)	0.239667		0.008544
C13 (7,5 mM)	0.111		0.00264575
C14 (7,5 mM)	0.161		0.00173205
C15 (7,5 mM)	0.300667		0.0052915
C13 (10 mM)	0.082		0.0011547
C14 (10 mM)	0.127667		0.00655744
C15 (10 mM)	0.349		0.00763763
C13 (15 mM)	0.046		0.00152753
C14 (15 mM)	0.128333		0.00608276
C15 (15 mM)	0.299833		0.00665833
Relative Aktivität (PlbF ohne FS = 100%)
							Stabw
	1mM	5mM	7,5mM	10mM	15mM		1mM	5mM	7,5mM	10mM	15mM
C13	110.358	51.8103	38.6835	28.577	16.031		1.3085	1.4431e-14	0.979908	0.440165	0.592064
C14	132.43	73.5335	56.1085	44.4918	44.7242		2.10719	1.10565	0.632905	2.49017	2.36683
C15	152.992	83.5238	104.782	121.627	104.492		2.15905	3.10503	1.97444	2.93379	2.67941
PlbF ohne FS	100		100
STABW	2.28527
