# Supplementary material for: Structural, mechanistic, and physiological insights into phospholipase A-mediated membrane phospholipid degradation in Pseudomonas aeruginosa
Source: eLife. 2022 May 10;11:e72824. doi: 10.7554/eLife.72824 (PMC9132575; doi:10.7554/eLife.72824)
Supplement: Figure 6—source data 2. [file elife-72824-fig6-data2.xlsx]

## Sheet: Figure 6b
OG-Protein	pNPB-Konz im Assay [mM]								DDM-Protein	pNPB-Konz im Assay [mM]
U/mg mit FS	0,05 mM	0,1 mM	0,2 mM	0,3 mM	0,5 mM	1 mM			U/mg mit FS	0,05 mM	0,1 mM	0,2 mM	0,3 mM	0,5 mM	1 mM
OG 0 mM C10	190.295	329.208	473.682	563.302	714.953	740.898	Platte2		DDM 0 mM C10	144.962	247.102	350.181	430.575	493.219	525.585	Platte1
	192.174	330.461	476.605	602.311	711.847	742.634	Platte2			140.487	239.942	348.511	425.354	493.636	521.513	Platte1
	197.029	337.378	471.855	596.19	708.467	753.14	Platte3			139.816	241.702	340.785	415.018	497.291	532.371	Platte2
	194.837	fail	475.691	590.709	702.986	731.58	Platte3			135.162	238.346	338.07	413.765	486.641	514.205	Platte2
OG 1mM C10	150.986	276.431	410.92	533.154	663.337	722.17	Platte2			143.157	238.182	338.279	415.122	490.817	521.095	Platte3
	149.106	275.021	405.439	540.189	658.952	737.153	Platte2			136.893	230.799	338.696	414.496	487.268	508.671	Platte3					pNPB-Konz im Assay [mM]
	154.431	fail	424.349	551.243	655.48	721.165	Platte3		DDM 1 mM C10	104.869	189.603	299.231	391.526	485.388	560.039	Platte1				Mittelwert U/mg	0.05	0.1	0.2	0.3	0.5	1
	151.612	fail	414.94	543.021	649.999	721.348	Platte3			104.869	191.84	303.929	398	488.207	562.649	Platte1				OG 0 mM C12	182.018	322.329	453.855	573.613	653.272	710.801
OG 3mM C10	138.144	229.761	364.968	468.566	585.136	641.96	Platte2			101.513	188.902	296.516	387.559	473.277	546.153	Platte2				OG 1 mM C12	62.8032	120.793	198.464	282.316	396.355	543.082
	132.662	228.586	369.17	469.936	582.213	633.189	Platte2			100.619	185.546	287.119	379.52	478.497	551.791	Platte2				OG 3 mM C12	31.4325	61.3793	112.052	165.997	256.073	391.561
	138.77	211.737	363.872	465.277	592.627	653.927	Platte3			98.4111	182.921	287.955	378.684	459.495	539.053	Platte3				OG 5 mM C12	19.7118	39.3635	72.1914	110.134	168.552	290.452
	135.481	209.584	358.938	472.129	575.544	651.826	Platte3			102.349	186.277	283.256	374.926	472.233	548.45	Platte3				OG 10 mM C12	11.4165	22.6985	43.1984	67.6236	109.251	195.562
OG 5mM C10	85.6921	161.883	252.508	348.067	446.183	526.851	Platte2		DDM 3 mM C10	87.6422	157.55	269.161	364.381	472.233	571.315	Platte1				OG 15 mM C12	4.57785	10.26	18.8937	30.7047	47.3245	94.9251
	84.648	155.358	261.187	343.225	440.245	511.96	Platte2			87.866	155.462	265.403	357.385	474.112	565.364	Platte1
	86.8797	139.409	273.52	345.326	455.593	528.861	Platte3			87.7765	158.177	260.391	349.868	479.75	565.26	Platte2
	84.661	138.496	262.74	355.375	441.981	527.216	Platte3			84.6443	156.506	259.765	351.434	462.106	554.506	Platte2					pNPB-Konz im Assay [mM]
OG 10mM C10	48.9669	84.5958	157.863	205.551	284.574	332.262	Platte2			87.0456	155.984	252.769	351.225	459.182	552.209	Platte3				Mittelwert U/mg	0.05	0.1	0.2	0.3	0.5	1
	49.9718	84.0477	147.54	206.83	273.703	338.383	Platte2			84.3609	152.434	259.974	346.945	460.331	548.032	Platte3				DDM 0 mM C12	125.374	221.358	306.693	391.676	458.611	493.048
	51.9816	83.5909	151.651	206.191	291.974	355.01	Platte3		DDM 5 mM C10	70.4449	135.207	231.992	325.019	443.939	573.195	Platte1				DDM 1 mM C12	24.071	48.7328	91.1037	140.869	214.476	345.45
	49.515	81.1243	156.676	209.388	274.982	359.03	Platte3			69.7737	129.047	235.333	323.349	435.586	560.353	Platte1				DDM 3 mM C12	7.57811	17.4796	32.6817	54.7621	92.71	172.524
OG 15mM C10	24.7575	48.1447	86.5143	120.956	173.485	230.674	Platte2			70.6388	128.003	225.519	323.662	429.635	553.357	Platte2				DDM 5 mM C12	0.614682	0.0478141	0.0770216	0.11418	0.199262	0.346404
	24.7575	48.6015	85.6921	119.677	171.11	233.598	Platte2			68.6252	132.91	223.64	313.952	441.746	557.22	Platte2				DDM 10 mM C12	-0.0216986	-0.38746	1.18552	-1.48537	2.40412	0.550713
	26.3106	fail	91.2648	130.731	171.384	231.405	Platte3			66.91	128.421	222.805	315.205	414.391	537.696	Platte3				DDM 15 mM C12	-0.199892	-0.526839	1.10573	-0.0620038	0.224991	-1.08552
	25.7624	fail	89.7117	120.407	171.11	235.608	Platte3			66.91	125.184	217.897	304.555	424.623	545.214	Platte3
									DDM 10 mM C10	50.7418	101.484	178.014	245.774	360.517	498.126	Platte1
	pNPB-Konz im Assay [mM]									47.9228	95.8457	169.244	261.331	369.914	505.956	Platte1
Mittelwert U/mg	0.05	0.1	0.2	0.3	0.5	1				52.5167	100.962	164.337	243.895	365.529	502.615	Platte2
OG 0 mM C10	193.584	332.349	474.458	588.128	709.563	742.063				49.2801	98.0382	173.942	246.714	348.302	502.407	Platte2
OG 1 mM C10	151.534	275.726	413.912	541.902	656.942	725.459				48.4449	97.0985	165.381	244.104	350.39	489.46	Platte3
OG 3 mM C10	136.264	219.917	364.237	468.977	583.88	645.226				47.9228	92.7134	169.139	245.67	347.467	489.251	Platte3
OG 5 mM C10	85.4702	148.787	262.489	347.998	446.001	523.722			DDM 15 mM C10	34.7675	70.9968	118.398	179.789	271.563	399.879	Platte1
OG 10 mM C10	50.1088	83.3396	153.433	206.99	281.308	346.171				33.4102	69.1175	123.931	182.19	270.205	422.953	Platte1
OG 15 mM C10	25.397	48.3731	88.2957	122.943	171.772	232.821				33.5147	67.4469	123.305	181.877	270.832	398.939	Platte2
										32.3662	67.0293	125.184	173.629	275.843	421.596	Platte2
	pNPB-Konz im Assay [mM]									31.0089	62.7486	115.683	172.689	263.315	404.577	Platte3
STABW	0.05	0.1	0.2	0.3	0.5	1				31.9486	63.5839	115.787	177.283	261.018	395.076	Platte3
OG 0 mM C10	2.95769	4.40001	2.12227	17.2158	5.12301	8.83699
OG 1 mM C10	2.20556	0.996663	7.9738	7.48243	5.63552	7.80797				pNPB-Konz im Assay [mM]
OG 3 mM C10	2.79277	10.7351	4.20635	2.8701	7.07971	9.57116			Mittelwert U/mg	0.05	0.1	0.2	0.3	0.5	1
OG 5 mM C10	1.05935	11.6694	8.62284	5.30253	6.86368	7.88998			DDM 0 mM C10	140.079	239.346	342.42	419.055	491.479	520.573
OG 10 mM C10	1.31439	1.533	4.76251	1.68184	8.60798	12.8786			DDM 1 mM C10	102.105	187.515	293.001	385.036	476.183	551.356
OG 15 mM C10	0.771585	0.322993	2.63142	5.21844	1.14924	2.23465			DDM 3 mM C10	86.5559	156.019	261.244	353.54	467.952	559.448
									DDM 5 mM C10	68.8838	129.795	226.198	317.624	431.653	554.506					DDM, C10	C10 concentration [mM]
									DDM 10 mM C10	49.4715	97.6902	170.009	247.914	357.02	497.969					Substrate [mM]	0	0.5	1.5	2.5	5	7.5
									DDM 15 mM C10	32.836	66.8205	120.381	177.91	268.796	407.17					0.05	140.079	102.105	86.5559	68.8838	49.4715	32.836
																				0.1	239.346	187.515	156.019	129.795	97.6902	66.8205
										pNPB-Konz im Assay [mM]										0.2	342.42	293.001	261.244	226.198	170.009	120.381
									STABW	0.05	0.1	0.2	0.3	0.5	1					0.3	419.055	385.036	353.54	317.624	247.914	177.91
									DDM 0 mM C10	3.68449	5.31899	5.47621	7.11215	4.07517	8.33898					0.5	491.479	476.183	467.952	431.653	357.02	268.796
									DDM 1 mM C10	2.51188	3.20957	8.0697	8.82654	10.3653	8.83173					1	520.573	551.356	559.448	554.506	497.969	407.17
									DDM 3 mM C10	1.61855	2.01986	5.59155	6.30999	8.53996	9.12966					KM	0.157196	0.274307	0.380663	0.527926	0.813445	1.27203
									DDM 5 mM C10	1.68332	3.63085	6.39454	7.92515	11.1331	12.3374					Vmax	621.894	716.248	788.426	858.68	910.637	929.898	Ki	st. Dev. Ki
									DDM 10 mM C10	1.83164	3.27823	5.18627	6.65942	9.61378	7.12045					Ki [mM]		0.671141	1.05516	1.06004	1.19769	1.05753	1.00831	0.17711
									DDM 15 mM C10	1.33175	3.16889	4.27381	4.08817	5.5498	12.092					st.dev. Km	0.01586	0.02305	0.03883	0.04635	0.06768	0.09831
																				st.dev. Vmax	20.71	24.31	36.4	38.06	43.85	47.3
																				OG, C10	C10 concentration [mM]
																				Substrate [mM]	0	0.5	1.5	2.5	5	7.5
																				0.05	193.584	151.534	136.264	85.4702	50.1088	25.397
																				0.1	332.349	275.726	219.917	148.787	83.3396	48.3731
																				0.2	474.458	413.912	364.237	262.489	153.433	88.2957
																				0.3	588.128	541.902	468.977	347.998	206.99	122.943
																				0.5	709.563	656.942	583.88	446.001	281.308	171.772
																				1	742.063	725.459	645.226	523.722	346.171	232.821
																				KM	0.168413	0.226138	0.247369	0.337964	0.451931	0.664605
																				Vmax	899.503	915.961	830.937	717.768	512.213	390.795	Ki	st. Dev. Ki
																				Ki [mM]		1.45875	3.1995	2.48322	2.97006	2.54558	2.53142	0.598643
																				st.dev. Km	0.02056	0.02582	0.03058	0.03801	0.04884	0.04294
																				st.dev. Vmax	37.18	39.44	40	35.08	26.55	13.72
																				DDM, C12	C12 concentration [mM]
																				Substrate [mM]	0	0.5	1.5	2.5
																				0.05	125.374	24.071	7.57811	0.614682
																				0.1	221.358	48.7328	17.4796	0.0478141
																				0.2	306.693	91.1037	32.6817	0.0770216
																				0.3	391.676	140.869	54.7621	0.11418
																				0.5	458.611	214.476	92.71	0.199262
																				1	493.048	345.45	172.524	0.346404
																				KM	0.171034	1.82759	13.8989	4.20752
																				Vmax	593.916	980.563	2580.32	1.81009			Ki	st. Dev. Ki
																				Ki [mM]		0.0516234	0.0186883	0.10593			0.0587472	0.0359707
																				st.dev. Km	0.01865	0.1774	9.944	1.362
																				st.dev. Vmax	22.06	68.63	1742	0.4944
																				OG, C12	C12 conc. [mM]
																				Substrate [mM]	0	0.5	1.5	2.5	5	7.5
																				0.05	182.018	62.8032	31.4325	19.7118	11.4165	4.57785
																				0.1	322.329	120.793	61.3793	39.3635	22.6985	10.26
																				0.2	453.855	198.464	112.052	72.1914	43.1984	18.8937
																				0.3	573.613	282.316	165.997	110.134	67.6236	30.7047
																				0.5	653.272	396.355	256.073	168.552	109.251	47.3245
																				1	710.801	543.082	391.561	290.452	195.562	94.9251
																				KM	0.163661	0.678387	1.40324	2.59738	4.63183	25.977
	PlaF in OG									U/mg in DDM										Vmax	848.497	916.29	946.426	1045.08	1103.77	2557.25	Ki	st. Dev. Ki
pNPB [mM]	0.05	0.1	0.2	0.3	0.5	1	Km	vmax	kcat	0.05	0.1	0.2	0.3	0.5	1					Ki [mM]		0.158979	0.198044	0.168118	0.183141	0.0475513	0.177071	0.0148678
U/mg	190.295	329.208	473.682	563.302	714.953	740.898				144.962	247.102	350.181	430.575	493.219	525.585					st.dev. Km	0.01634	0.04169	0.1279	0.1565	0.6403	22.73
U/mg	192.174	330.461	476.605	602.311	711.847	742.634				140.487	239.942	348.511	425.354	493.636	521.513					st.dev. Vmax	28.39	30.8	58.28	48.97	130.5	2167
U/mg	197.029	337.378	471.855	596.19	708.467	753.14				139.816	241.702	340.785	415.018	497.291	532.371
U/mg	194.837	fail	475.691	590.709	702.986	731.58				135.162	238.346	338.07	413.765	486.641	514.205
U/mg	192.625	333.52	462.982	593.93	683.213	743.177				143.157	238.182	338.279	415.122	490.817	521.095
U/mg	181.819	324.907	466.545	589.089	678.365	721.643				136.893	230.799	338.696	414.496	487.268	508.671								OG	DDM
U/mg	fail	fail	fail	fail	638.82	727.245				125.443	224.515	312.98	396.276	465.564	500.087								Ki [mM]	Ki [mM]
U/mg	fail	fail	fail	fail	638.037	694.236				123.43	224.888	310.881	392.146	467.87	492.618							C10	2.53 ± 0.60	1.01 ± 0.18
U/mg	177.048	312.546	440.571	558.183	638.218	689.839				124.015	216.908	302.895	387.258	452.484	488.384							C12	0.18 ± 0.01	0.06 ± 0.04
U/mg	176.578	318.341	445.321	553.25	642.977	688.665				120.435	214.597	302.207	381.82	454.377	489.417
										130.469	224.664	308.471	398.41	456.167	497.299
										128.455	222.576	302.723	394.142	455.203	490.484
	OG
pNPB [mM]	0.05	0.1	0.2	0.3	0.5	1				DDM
average U/mg	166.939	285.808	412.606	516.363	614.398	657.642				132.727	230.352	324.557	405.365	475.045	506.811
st.dev. U/mg	7.58805	8.0565	13.02	18.0816	31.5965	22.8469				8.68586	10.4954	17.9182	15.7605	16.2206	15.1861														PlaF in OG
																				PlaF in OG	C10 concentration [mM]									C10 concentration [mM]
																				Substrate [mM]	0	0.5	1.5	2.5	5	7.5			1/[S]	0 mM	0.5 mM	1.5 mM	2.5 mM	5.0 mM	7.5 mM
																				0.05	193.584	151.534	136.264	85.4702	50.1088	25.397			20	0.00516572	0.00659919	0.00733868	0.0117	0.0199566	0.0393747
																				0.1	332.349	275.726	219.917	148.787	83.3396	48.3731			10	0.00300888	0.00362679	0.00454717	0.00672104	0.0119991	0.0206727
																				0.2	474.458	413.912	364.237	262.489	153.433	88.2957			5	0.00210767	0.00241597	0.00274547	0.00380968	0.00651752	0.0113256
																				0.3	588.128	541.902	468.977	347.998	206.99	122.943			3.33333	0.00170031	0.00184535	0.0021323	0.00287358	0.00483115	0.00813388
																				0.5	709.563	656.942	583.88	446.001	281.308	171.772			2	0.00140932	0.0015222	0.00171268	0.00224215	0.00355482	0.00582166
																				1	742.063	725.459	645.226	523.722	346.171	232.821			1	0.00134759	0.00137844	0.00154985	0.00190941	0.00288874	0.00429514
																				KM [mM]	0.168413	0.226138	0.247369	0.337964	0.451931	0.664605			KM	0.168413	0.226138	0.247369	0.337964	0.451931	0.664605
																				Vmax [U/mg]	899.503	915.961	830.937	717.768	512.213	390.795	Ki	st. Dev. Ki	Vmax	899.503	915.961	830.937	717.768	512.213	390.795
																											#DIV/0!	#DIV/0!	Ki [mM]		#REF!	#REF!	#REF!	#REF!	#REF!
																				st.dev. Km	0.02056	0.02582	0.03058	0.03801	0.04884	0.04294			st.dev. Km	0.02056	0.02582	0.03058	0.03801	0.04884	0.04294
																				st.dev. Vmax	37.18	39.44	40	35.08	26.55	13.72			st.dev. Vmax	37.18	39.44	40	35.08	26.55	13.72
																																			y	b	a	x	Km(app)
																												c(FA C10) [mM]	Km [mM]	Vmax [U/mg]					0	0.00213	0.00186	1.14516	0.873239
																												0	0.17±0.02	899.5±37.2					0	0.00197	0.00092	2.1413	0.467005
																												0.5	0.23±0.03	916.0±39.4					0	0.00126	0.00053	2.37736	0.420635
																												1.5	0.25±0.03	830.9±40.0					0	0.00119	0.00031	3.83871	0.260504
										OG	DDM																	2.5	0.34±0.04	717.8±35.1					0	0.00099	0.00028	3.53571	0.282828
									Km [mM]	0.17 ± 0.01	0.16 ± 0.01																	5	0.45±0.05	512.2±26.6					0	0.00105	0.0002	5.25	0.190476
									kcat [s-1]	520.4 ± 31.7	361.3 ± 9.2																	7.5	0.66±0.04	390.8±13.7
																													PlaF in OG
																														C10 concentration [mM]
																													1/[S]	0 mM	0.5 mM	1.5 mM	2.5 mM	5.0 mM	7.5 mM
																													20	7.8925e-05	9.60506e-05	0.000150408	0.000145014	0.000523473	0.00119624
																													10	3.98349e-05	1.31097e-05	0.000221967	0.000527135	0.000220718	0.000138034
																													5	9.42768e-06	4.65425e-05	3.17057e-05	0.000125149	0.000202302	0.000337528
																					STABW								3.33333	4.97718e-05	2.54801e-05	1.30495e-05	4.37853e-05	3.92541e-05	0.000345252
																				pNPB [mM]	OG 0 mM C10	OG 1 mM C10	OG 3 mM C10	OG 5 mM C10	OG 10 mM C10	OG 15 mM C10			2	1.01752e-05	1.30581e-05	2.07667e-05	3.45053e-05	0.000108777	3.89496e-05
																				0.05	2.95769	2.20556	2.79277	1.05935	1.31439	0.771585			1	1.60481e-05	1.48358e-05	2.29901e-05	2.87656e-05	0.00010747	4.12254e-05
																				0.1	4.40001	0.996663	10.7351	11.6694	1.533	0.322993			KM	0.168413	0.226138	0.247369	0.337964	0.451931	0.664605
																				0.2	2.12227	7.9738	4.20635	8.62284	4.76251	2.63142			Vmax	899.503	915.961	830.937	717.768	512.213	390.795
																				0.3	17.2158	7.48243	2.8701	5.30253	1.68184	5.21844			Ki [mM]		#REF!	#REF!	#REF!	#REF!	#REF!
																				0.5	5.12301	5.63552	7.07971	6.86368	8.60798	1.14924			st.dev. Km	0.02056	0.02582	0.03058	0.03801	0.04884	0.04294
																				1	8.83699	7.80797	9.57116	7.88998	12.8786	2.23465			st.dev. Vmax	37.18	39.44	40	35.08	26.55	13.72
																					% STABW
																				pNPB [mM]	OG 0 mM C10	OG 1 mM C10	OG 3 mM C10	OG 5 mM C10	OG 10 mM C10	OG 15 mM C10
																				0.05	1.52786	1.45549	2.04952	1.23944	2.62306	3.0381
																				0.1	1.32391	0.361469	4.88143	7.84305	1.83946	0.667712
																				0.2	0.447304	1.92645	1.15484	3.28503	3.10397	2.98023
																				0.3	2.92722	1.38077	0.611991	1.52372	0.812521	4.24462
																				0.5	0.721995	0.857842	1.21253	1.53894	3.05998	0.669046
																				1	1.19087	1.07628	1.48338	1.50652	3.7203	0.959814
						kcat= vmax/[Enz]
						PlaF [µM] OG	0.0038
						PlaF [µM] DDM	0.003325
						Mw(PlaF) [g/mol]	35660	with HHHHHH se. At C-terminus												143.157	136.893	125.443	123.43	124.015	120.435	130.469
																				238.182	230.799	224.515	224.888	216.908	214.597	224.664
	pNPB [mM]	U/mg	U/mg	U/mg	U/mg	U/mg	U/mg	U/mg	U/mg						pNPB [mM]	average U/mg	st.dev. U/mg			338.279	338.696	312.98	310.881	302.895	302.207	308.471
PlaF in OG	0.05	190.295	192.174	197.029	194.837	192.625	181.819	177.048	176.578					OG	0.05	144.962	140.487	139.816	135.162	415.122	414.496	396.276	392.146	387.258	381.82	398.41
	0.1	329.208	330.461	337.378		333.52	324.907	312.546	318.341						0.1	247.102	239.942	241.702	238.346	490.817	487.268	465.564	467.87	452.484	454.377	456.167
	0.2	473.682	476.605	471.855	475.691	462.982	466.545	440.571	445.321						0.2	350.181	348.511	340.785	338.07	521.095	508.671	500.087	492.618	488.384	489.417	497.299
	0.3	563.302	602.311	596.19	590.709	593.93	589.089	558.183	553.25						0.3	430.575	425.354	415.018	413.765	0.158575	0.157801	0.171435	0.169398	0.172845	0.178871	0.166567
	0.5	714.953	711.847	708.467	702.986	683.213	678.365	638.218	642.977						0.5	493.219	493.636	497.291	486.641	621.43	612.661	602.987	596.77	588.729	593.416	593.561
	1	740.898	742.634	753.14	731.58	743.177	721.643	689.839	688.665	average	st.dev				1	525.585	521.513	532.371	514.205	369.337	364.125	358.375	354.68	349.901	352.687	352.773
	Km [mM]	0.174457	0.167782	0.169591	0.159279	0.16818	0.165079	0.163954	0.161076	0.166175	0.00456278				Km [mM]	0.149646	0.154528	0.16525	0.157981
	vmax [U/mg]	902.151	903.681	908.302	880.987	889.505	871.441	825.766	823.311	875.643	31.6626				vmax [U/mg]	622.601	623.318	636.429	615.471	0.01505	0.0191	0.01844	0.02147	0.01829	0.01865	0.01716
	kcat [s-1]	536.179	537.088	539.834	523.6	528.663	517.927	490.78	489.321	520.424	18.8181				kcat [s-1]	370.033	370.459	378.251	365.795	19.53	24.51	22.1	25.67	21.3	21.42	20.62
	st.dev. KM	0.02333	0.02264	0.01884	0.0275	0.01698	0.02036	0.01732	0.01663						st.dev. KM	0.01462	0.01665	0.01466	0.0169
	st.dev. Vmax	41.39	41.24	34.26	45.94	30.4	36.13	29.24	28.31						st.dev. Vmax	19.71	22.02	18.98	21.77
								T-test
							Km	0.0561783
							vmax	4.20538e-05
							kcat	3.37504e-05
																														PlaF in OG
																					OG, C12	C12 conc. [mM]									C12 concentration [mM]
																					Substrate [mM]	0	0.5	1.5	2.5	5	7.5			1/[S]	0 mM	0.5 mM	1.5 mM	2.5 mM	5.0 mM	7.5 mM
																					0.05	182.018	62.8032	31.4325	19.7118	11.4165	4.57785			20	0.00549397	0.0159228	0.0318142	0.0507309	0.0875925	0.218443
																					0.1	322.329	120.793	61.3793	39.3635	22.6985	10.26			10	0.00310242	0.00827865	0.0162921	0.0254043	0.0440558	0.0974659
																					0.2	453.855	198.464	112.052	72.1914	43.1984	18.8937			5	0.00220335	0.0050387	0.00892444	0.0138521	0.023149	0.0529278
																					0.3	573.613	282.316	165.997	110.134	67.6236	30.7047			3.33333	0.00174334	0.00354214	0.0060242	0.00907982	0.0147877	0.0325683
																					0.5	653.272	396.355	256.073	168.552	109.251	47.3245			2	0.00153076	0.00252299	0.00390513	0.00593288	0.00915324	0.0211307
																					1	710.801	543.082	391.561	290.452	195.562	94.9251			1	0.00140686	0.00184134	0.00255388	0.00344291	0.00511346	0.0105346
																					KM	0.163661	0.678387	1.40324	2.59738	4.63183	25.977			KM	0.168413	0.226138	0.247369	0.337964	0.451931	0.664605
																					Vmax	848.497	916.29	946.426	1045.08	1103.77	2557.25	Ki	st. Dev. Ki	Vmax	899.503	915.961	830.937	717.768	512.213	390.795
																					Ki [mM]		0.158979	0.198044	0.168118	0.183141	0.0475513	0.151167	0.0534872	Ki [mM]		#REF!	#REF!	#REF!	#REF!	#REF!
																					st.dev. Km	0.01634	0.04169	0.1279	0.1565	0.6403	22.73			st.dev. Km	0.02056	0.02582	0.03058	0.03801	0.04884	0.04294
																					st.dev. Vmax	28.39	30.8	58.28	48.97	130.5	2167			st.dev. Vmax	37.18	39.44	40	35.08	26.55	13.72
																																				y	b	a	x	Km(app)
																													c(FA C12) [mM]	Km [mM]	Vmax [U/mg]					0	0.00213	0.00186	1.14516	0.873239
																													0	0.17±0.02	899.5±37.2					0	0.00197	0.00092	2.1413	0.467005
																													0.5	0.23±0.03	916.0±39.4					0	0.00126	0.00053	2.37736	0.420635
																													1.5	0.25±0.03	830.9±40.0					0	0.00119	0.00031	3.83871	0.260504
																													2.5	0.34±0.04	717.8±35.1					0	0.00099	0.00028	3.53571	0.282828
																													5	0.45±0.05	512.2±26.6					0	0.00105	0.0002	5.25	0.190476
																													7.5	0.66±0.04	390.8±13.7
																														PlaF in OG
																															C12 concentration [mM]
																														1/[S]	0 mM	0.5 mM	1.5 mM	2.5 mM	5.0 mM	7.5 mM
																														20	0.00022509	0.000698893	0.00132054	0.00158149	0.0113409	0.038922
																														10	8.67125e-05	0.000273513	0.000814795	0.00139893	0.00282156	0.00735607
																														5	6.22744e-05	0.000211946	0.000391818	0.000568053	0.00137165	0.004538
																						STABW								3.33333	6.33887e-05	6.14018e-05	0.000330923	0.000457868	0.000878064	0.00246669
																					pNPB [mM]	OG 0 mM C10	OG 1 mM C10	OG 3 mM C10	OG 5 mM C10	OG 10 mM C10	OG 15 mM C10			2	5.0253e-05	0.000102635	0.000102693	0.000298116	0.00043632	0.000918648
																					0.05	7.45732	2.7566	1.3047	0.614499	1.47813	0.815676			1	4.54798e-05	6.30764e-05	9.10482e-05	0.000175002	0.000179907	0.00115802
																					0.1	9.00906	3.99078	3.06967	2.16762	1.45373	0.774355			KM	0.168413	0.226138	0.247369	0.337964	0.451931	0.664605
																					0.2	12.8275	8.34811	4.91952	2.96047	2.55964	1.61993			Vmax	899.503	915.961	830.937	717.768	512.213	390.795
																					0.3	20.8569	4.89385	9.1186	5.55375	4.01535	2.32554			Ki [mM]		#REF!	#REF!	#REF!	#REF!	#REF!
																					0.5	21.4462	16.1238	6.73397	8.46943	5.20781	2.05741			st.dev. Km	0.02056	0.02582	0.03058	0.03801	0.04884	0.04294
																					1	22.9782	18.6037	13.9595	14.7636	6.88049	10.4346			st.dev. Vmax	37.18	39.44	40	35.08	26.55	13.72
																						% STABW
																					pNPB [mM]	OG 0 mM C10	OG 1 mM C10	OG 3 mM C10	OG 5 mM C10	OG 10 mM C10	OG 15 mM C10
																					0.05	4.09703	4.38927	4.1508	3.11741	12.9473	17.8179
																					0.1	2.79499	3.30383	5.00115	5.50667	6.40451	7.54732
																					0.2	2.82635	4.20637	4.3904	4.10086	5.92531	8.57395
																					0.3	3.63606	1.73347	5.49323	5.0427	5.93779	7.5739
																					0.5	3.28288	4.06801	2.6297	5.02481	4.76684	4.34745
																					1	3.23271	3.42557	3.5651	5.08297	3.51831	10.9925
																										0.05	4.57785
																										0.1	10.26
																										0.2	18.8937
																										0.3	30.7047
																										0.5	47.3245
																										1	94.9251
