# Supplementary material for: Structural, mechanistic, and physiological insights into phospholipase A-mediated membrane phospholipid degradation in Pseudomonas aeruginosa
Source: eLife. 2022 May 10;11:e72824. doi: 10.7554/eLife.72824 (PMC9132575; doi:10.7554/eLife.72824)
Supplement: Supplementary file 4. [file elife-72824-supp4.xls]

## Sheet: PlaF homologs
Organism	Sequence identity [%]	Alignment length
Pseudomonas aeruginosa AZPAE14711	100.0	315
Pseudomonas aeruginosa Pae221_ST274	100.0	315
Pseudomonas aeruginosa LESlike5	100.0	315
Pseudomonas aeruginosa TRN6601	100.0	315
Pseudomonas aeruginosa NFHH01	100.0	315
Pseudomonas aeruginosa 85	100.0	315
Pseudomonas aeruginosa HUM-12-D2	100.0	315
Pseudomonas aeruginosa 1510	100.0	315
Pseudomonas aeruginosa 5054408352	100.0	315
Pseudomonas aeruginosa AZPAE14712	100.0	315
Pseudomonas aeruginosa LES_CF_sputum_CF03_contigs_34_a1	100.0	315
Pseudomonas aeruginosa LESlike7	100.0	315
Pseudomonas aeruginosa isolate 206	100.0	315
Pseudomonas aeruginosa isolate 365	100.0	315
Pseudomonas aeruginosa Pa127	100.0	315
Pseudomonas aeruginosa HUM-311-D2	100.0	315
Pseudomonas aeruginosa PA-81	100.0	315
Pseudomonas aeruginosa 4044301968	100.0	315
Pseudomonas aeruginosa AZPAE12415	100.0	315
Pseudomonas aeruginosa LES_CF_sputum_CF03_contigs_37_a1	100.0	315
Pseudomonas aeruginosa LES400	100.0	315
Pseudomonas aeruginosa isolate 375	100.0	315
Pseudomonas aeruginosa isolate B10W	100.0	315
Pseudomonas aeruginosa S53_C01_BS	100.0	315
Pseudomonas aeruginosa HUM-264	100.0	315
Pseudomonas aeruginosa PA_HTX2	100.0	315
Pseudomonas aeruginosa 4064320487	100.0	315
Pseudomonas aeruginosa AZPAE12414	100.0	315
Pseudomonas aeruginosa NCGM1984	100.0	315
Pseudomonas aeruginosa LESB65	100.0	315
Pseudomonas aeruginosa isolate 243	100.0	315
Pseudomonas aeruginosa isolate 204	100.0	315
Pseudomonas aeruginosa env099	100.0	315
Pseudomonas aeruginosa HUM-259	100.0	315
Pseudomonas aeruginosa PA_HTX1	100.0	315
Pseudomonas aeruginosa 4094345258	100.0	315
Pseudomonas aeruginosa AZPAE12413	100.0	315
Pseudomonas aeruginosa NCGM1900	100.0	315
Pseudomonas aeruginosa LESlike4	100.0	315
Pseudomonas aeruginosa isolate 91	100.0	315
Pseudomonas aeruginosa isolate 198	100.0	315
Pseudomonas aeruginosa S626_C13_RS	100.0	315
Pseudomonas aeruginosa HUM-281	100.0	315
Pseudomonas aeruginosa B1	100.0	315
Pseudomonas aeruginosa 5024379144-15	100.0	315
Pseudomonas aeruginosa AZPAE12412	100.0	315
Pseudomonas aeruginosa O400	100.0	315
Pseudomonas aeruginosa NCMG1179	100.0	315
Pseudomonas aeruginosa isolate 63	100.0	315
Pseudomonas aeruginosa isolate 245	100.0	315
Pseudomonas aeruginosa 297	100.0	315
Pseudomonas aeruginosa HUM-277	100.0	315
Pseudomonas aeruginosa C9	100.0	315
Pseudomonas aeruginosa 19	100.0	315
Pseudomonas aeruginosa AZPAE14719	100.0	315
Pseudomonas aeruginosa MRSN 317	100.0	315
Pseudomonas aeruginosa B3-20M	100.0	315
Pseudomonas aeruginosa isolate 82.1	100.0	315
Pseudomonas aeruginosa isolate 322	100.0	315
Pseudomonas aeruginosa 2623	100.0	315
Pseudomonas aeruginosa HUM-262	100.0	315
Pseudomonas aeruginosa PA_180	100.0	315
Pseudomonas aeruginosa 14.2	100.0	315
Pseudomonas aeruginosa AZPAE12150	100.0	315
Pseudomonas aeruginosa Pae_CF67.01p	100.0	315
Pseudomonas aeruginosa B3-1811	100.0	315
Pseudomonas aeruginosa isolate 380	100.0	315
Pseudomonas aeruginosa P49	100.0	315
Pseudomonas aeruginosa HIAE_PA16	100.0	315
Pseudomonas aeruginosa HUM-280	100.0	315
Pseudomonas aeruginosa PA_112	100.0	315
Pseudomonas aeruginosa 12	100.0	315
Pseudomonas aeruginosa AZPAE12146	100.0	315
Pseudomonas aeruginosa Pae_CF67.01l	100.0	315
Pseudomonas aeruginosa NCGM2.S1	100.0	315
Pseudomonas aeruginosa isolate 81.1	100.0	315
Pseudomonas aeruginosa isolate 261	100.0	315
Pseudomonas aeruginosa S443_C09_RS	100.0	315
Pseudomonas aeruginosa HUM-243	100.0	315
Pseudomonas aeruginosa PA_254	100.0	315
Pseudomonas aeruginosa 9	100.0	315
Pseudomonas aeruginosa AZPAE12149	100.0	315
Pseudomonas aeruginosa Pae_CF67.01r	100.0	315
Pseudomonas aeruginosa RB	100.0	315
Pseudomonas aeruginosa isolate 370	100.0	315
Pseudomonas aeruginosa isolate 31	100.0	315
Pseudomonas aeruginosa FFUP_PS_690	100.0	315
Pseudomonas aeruginosa HUM-312-D1	100.0	315
Pseudomonas aeruginosa PA_187	100.0	315
Pseudomonas aeruginosa 11	100.0	315
Pseudomonas aeruginosa AZPAE14715	100.0	315
Pseudomonas aeruginosa Pae_CF67.01k	100.0	315
Pseudomonas aeruginosa Pae_CF67.10l	100.0	315
Pseudomonas aeruginosa isolate 225	100.0	315
Pseudomonas aeruginosa isolate 374	100.0	315
Pseudomonas aeruginosa AR_0354	100.0	315
Pseudomonas aeruginosa HUM-323-D1	100.0	315
Pseudomonas aeruginosa PA_185	100.0	315
Pseudomonas aeruginosa 4	100.0	315
Pseudomonas aeruginosa AZPAE12140	100.0	315
Pseudomonas aeruginosa Pae_CF67.01n	100.0	315
Pseudomonas aeruginosa BTP032	100.0	315
Pseudomonas sp HMSC066B03	100.0	315
Pseudomonas aeruginosa isolate 351	100.0	315
Pseudomonas aeruginosa Env_58	100.0	315
Pseudomonas aeruginosa HUM-12-D1	100.0	315
Pseudomonas aeruginosa PA_178	100.0	315
Pseudomonas aeruginosa 4104355340-15	100.0	315
Pseudomonas aeruginosa AZPAE14722	100.0	315
Pseudomonas aeruginosa Pae_CF67.01m	100.0	315
Pseudomonas aeruginosa BTP037	100.0	315
Pseudomonas aeruginosa isolate 1-2	100.0	315
Pseudomonas aeruginosa isolate 253	100.0	315
Pseudomonas aeruginosa S854_C18_BS	100.0	315
Pseudomonas aeruginosa HUM-13	100.0	315
Pseudomonas aeruginosa PA_179	100.0	315
Pseudomonas aeruginosa 5034388498-21	100.0	315
Pseudomonas aeruginosa AZPAE12142	100.0	315
Pseudomonas aeruginosa Pae_CF67.01q	100.0	315
Pseudomonas aeruginosa BTP031	100.0	315
Pseudomonas aeruginosa SCH_ABX11	100.0	315
Pseudomonas aeruginosa isolate 318	100.0	315
Pseudomonas aeruginosa ATCC BAA-2112	100.0	315
Pseudomonas aeruginosa HUM-375	100.0	315
Pseudomonas aeruginosa PA_304	100.0	315
Pseudomonas aeruginosa 5034388498-20	100.0	315
Pseudomonas aeruginosa AZPAE12136	100.0	315
Pseudomonas aeruginosa Pae_CF67.01s	100.0	315
Pseudomonas aeruginosa BTP033	100.0	315
Pseudomonas aeruginosa SCH_ABX01	100.0	315
Pseudomonas aeruginosa isolate 174	100.0	315
Pseudomonas aeruginosa RNS_PA51	100.0	315
Pseudomonas aeruginosa HUM-396	100.0	315
Pseudomonas aeruginosa PA_294	100.0	315
Pseudomonas aeruginosa 5024379144-14	100.0	315
Pseudomonas aeruginosa AZPAE12138	100.0	315
Pseudomonas aeruginosa Pae_CF67.01o	100.0	315
Pseudomonas aeruginosa BTP035	100.0	315
Pseudomonas aeruginosa isolate 242	100.0	315
Pseudomonas aeruginosa isolate 113	100.0	315
Pseudomonas aeruginosa BK6	100.0	315
Pseudomonas aeruginosa HUM-321-D2	100.0	315
Pseudomonas aeruginosa B41226	100.0	315
Pseudomonas aeruginosa 6095	100.0	315
Pseudomonas aeruginosa AZPAE14538	100.0	315
Pseudomonas aeruginosa Pae_CF67.02c	100.0	315
Pseudomonas aeruginosa BTP034	100.0	315
Pseudomonas sp HMSC067D05	100.0	315
Pseudomonas aeruginosa isolate 127	100.0	315
Pseudomonas sp HMSC066B11	100.0	315
Pseudomonas aeruginosa HUM-237	100.0	315
Pseudomonas aeruginosa SP4371	100.0	315
Pseudomonas aeruginosa 6092.2	100.0	315
Pseudomonas aeruginosa AZPAE14526	100.0	315
Pseudomonas aeruginosa Pae_CF67.02a	100.0	315
Pseudomonas aeruginosa BTP036	100.0	315
Pseudomonas aeruginosa isolate 203.1	100.0	315
Pseudomonas aeruginosa isolate 59	100.0	315
Pseudomonas aeruginosa JB2	100.0	315
Pseudomonas aeruginosa HUM-343	100.0	315
Pseudomonas aeruginosa SP2230	100.0	315
Pseudomonas aeruginosa 6086.2	100.0	315
Pseudomonas aeruginosa AZPAE14505	100.0	315
Pseudomonas aeruginosa UM-01	100.0	315
Pseudomonas aeruginosa PA1RG	100.0	315
Pseudomonas aeruginosa isolate 56	100.0	315
Pseudomonas aeruginosa isolate 60	100.0	315
Pseudomonas aeruginosa 6007	100.0	315
Pseudomonas aeruginosa HUM-270	100.0	315
Pseudomonas aeruginosa B14130	100.0	315
Pseudomonas aeruginosa 6086.1	100.0	315
Pseudomonas aeruginosa AZPAE14509	100.0	315
Pseudomonas aeruginosa Pae_CF67.02i	100.0	315
Pseudomonas aeruginosa isolate 15.211Gc	100.0	315
Pseudomonas aeruginosa COPD6a	100.0	315
Pseudomonas aeruginosa isolate 115	100.0	315
Pseudomonas aeruginosa env091	100.0	315
Pseudomonas aeruginosa ENV-205	100.0	315
Pseudomonas aeruginosa B17932	100.0	315
Pseudomonas aeruginosa 6004	100.0	315
Pseudomonas aeruginosa AZPAE14499	100.0	315
Pseudomonas aeruginosa Pae_CF67.02d	100.0	315
Pseudomonas aeruginosa isolate TSB 7	100.0	315
Pseudomonas aeruginosa isolate 258	100.0	315
Pseudomonas aeruginosa isolate 367	100.0	315
Pseudomonas aeruginosa PA5	100.0	315
Pseudomonas aeruginosa ENV-246	100.0	315
Pseudomonas aeruginosa R997	100.0	315
Pseudomonas aeruginosa 6000.2	100.0	315
Pseudomonas aeruginosa AZPAE14441	100.0	315
Pseudomonas aeruginosa Pae_CF67.02g	100.0	315
Pseudomonas aeruginosa isolate 15% 1	100.0	315
Pseudomonas aeruginosa isolate 126	100.0	315
Pseudomonas aeruginosa isolate 79	100.0	315
Pseudomonas aeruginosa S426_C09_BS	100.0	315
Pseudomonas aeruginosa ENV-247	100.0	315
Pseudomonas aeruginosa R4671	100.0	315
Pseudomonas aeruginosa 6000.1	100.0	315
Pseudomonas aeruginosa AZPAE14442	100.0	315
Pseudomonas aeruginosa Pae_CF67.02k	100.0	315
Pseudomonas aeruginosa isolate TSB Bead DWL Pool 2	100.0	315
Pseudomonas aeruginosa isolate 246	100.0	315
Pseudomonas aeruginosa isolate 349	100.0	315
Pseudomonas aeruginosa S49_C01_BS	100.0	315
Pseudomonas aeruginosa HUM-350	100.0	315
Pseudomonas aeruginosa U3484	100.0	315
Pseudomonas aeruginosa 5999.1	100.0	315
Pseudomonas aeruginosa AZPAE14721	100.0	315
Pseudomonas aeruginosa Pae_CF67.02l	100.0	315
Pseudomonas aeruginosa isolate RW130	100.0	315
Pseudomonas aeruginosa SCH_ABX02	100.0	315
Pseudomonas sp HMSC071F02	100.0	315
Pseudomonas aeruginosa Pae112	100.0	315
Pseudomonas aeruginosa HUM-373	100.0	315
Pseudomonas aeruginosa U1849	100.0	315
Pseudomonas aeruginosa 5999.2	100.0	315
Pseudomonas aeruginosa AZPAE14422	100.0	315
Pseudomonas aeruginosa Pae_CF67.02m	100.0	315
Pseudomonas aeruginosa isolate RW176	100.0	315
Pseudomonas aeruginosa isolate 89	100.0	315
Pseudomonas aeruginosa P37	100.0	315
Pseudomonas aeruginosa Pa64	100.0	315
Pseudomonas aeruginosa HUM-229	100.0	315
Pseudomonas aeruginosa R3890	100.0	315
Pseudomonas aeruginosa 5995	100.0	315
Pseudomonas aeruginosa AZPAE14404	100.0	315
Pseudomonas aeruginosa Pae_CF67.02s	100.0	315
Pseudomonas aeruginosa isolate TSB 6	100.0	315
Pseudomonas sp HMSC069G05	100.0	315
Pseudomonas aeruginosa isolate 264	100.0	315
Pseudomonas aeruginosa env224	100.0	315
Pseudomonas aeruginosa HUM-319-D2	100.0	315
Pseudomonas aeruginosa B348	100.0	315
Pseudomonas aeruginosa 5993	100.0	315
Pseudomonas aeruginosa AZPAE14410	100.0	315
Pseudomonas aeruginosa Pae_CF67.03a	100.0	315
Pseudomonas aeruginosa 14650	100.0	315
Pseudomonas aeruginosa PAC17	100.0	315
Pseudomonas aeruginosa isolate 116	100.0	315
Pseudomonas aeruginosa HIAE_PA15	100.0	315
Pseudomonas aeruginosa HUM-269	100.0	315
Pseudomonas aeruginosa R4164	100.0	315
Pseudomonas aeruginosa 5987	100.0	315
Pseudomonas aeruginosa AZPAE14403	100.0	315
Pseudomonas aeruginosa Pae_CF67.03c	100.0	315
Pseudomonas aeruginosa 14649	100.0	315
Pseudomonas aeruginosa isolate 201	100.0	315
Pseudomonas aeruginosa isolate 189	100.0	315
Pseudomonas aeruginosa SJU-W4_1	100.0	315
Pseudomonas aeruginosa HUM-275-D1	100.0	315
Pseudomonas aeruginosa R4656	100.0	315
Pseudomonas aeruginosa 6092.3	100.0	315
Pseudomonas aeruginosa AZPAE14395	100.0	315
Pseudomonas aeruginosa Pae_CF67.03j	100.0	315
Pseudomonas aeruginosa 14651	100.0	315
Pseudomonas aeruginosa isolate 265	100.0	315
Pseudomonas aeruginosa isolate 27	100.0	315
Pseudomonas aeruginosa W21b-2	100.0	315
Pseudomonas aeruginosa HUM-274	100.0	315
Pseudomonas aeruginosa R4722	100.0	315
Pseudomonas aeruginosa 6001	100.0	315
Pseudomonas aeruginosa AZPAE14394	100.0	315
Pseudomonas aeruginosa Pae_CF67.03n	100.0	315
Pseudomonas aeruginosa 14672	100.0	315
Pseudomonas aeruginosa CLB24402	100.0	315
Pseudomonas aeruginosa isolate 379	100.0	315
Pseudomonas aeruginosa CL297	100.0	315
Pseudomonas aeruginosa HUM-10	100.0	315
Pseudomonas aeruginosa R2483	100.0	315
Pseudomonas aeruginosa 6000.3	100.0	315
Pseudomonas aeruginosa AZPAE14393	100.0	315
Pseudomonas aeruginosa Pae_CF67.03p	100.0	315
Pseudomonas aeruginosa 14673	100.0	315
Pseudomonas aeruginosa isolate 259	100.0	315
Pseudomonas aeruginosa isolate 221	100.0	315
Pseudomonas aeruginosa SJU-R10_2	100.0	315
Pseudomonas aeruginosa HUM-244	100.0	315
Pseudomonas aeruginosa B1486	100.0	315
Pseudomonas aeruginosa 6088	100.0	315
Pseudomonas aeruginosa AZPAE14720	100.0	315
Pseudomonas aeruginosa Pae_CF67.04d	100.0	315
Pseudomonas aeruginosa ATCC 33349	100.0	315
Pseudomonas aeruginosa isolate LRJ05	100.0	315
Pseudomonas aeruginosa isolate 3-2	100.0	315
Pseudomonas aeruginosa env158	100.0	315
Pseudomonas aeruginosa HUM-311-D1	100.0	315
Pseudomonas aeruginosa PAO1, isolate 2017-E	100.0	315
Pseudomonas aeruginosa 5999.3	100.0	315
Pseudomonas aeruginosa AZPAE14705	100.0	315
Pseudomonas aeruginosa Pae_CF67.04g	100.0	315
Pseudomonas aeruginosa ATCC 33350	100.0	315
Pseudomonas aeruginosa isolate 336	100.0	315
Pseudomonas aeruginosa isolate 38	100.0	315
Pseudomonas aeruginosa AR_0357	100.0	315
Pseudomonas aeruginosa HUM-389	100.0	315
Pseudomonas aeruginosa PAO1, isolate 2017-G	100.0	315
Pseudomonas aeruginosa 5996	100.0	315
Pseudomonas aeruginosa AZPAE14708	100.0	315
Pseudomonas aeruginosa Pae_CF67.04j	100.0	315
Pseudomonas aeruginosa ATCC 33351	100.0	315
Pseudomonas aeruginosa isolate 81	100.0	315
Pseudomonas aeruginosa PHLS08959	100.0	315
Pseudomonas aeruginosa PB367	100.0	315
Pseudomonas aeruginosa HUM-336	100.0	315
Pseudomonas aeruginosa PAO1, isolate 2017-F	100.0	315
Pseudomonas aeruginosa PA-CL522b	100.0	315
Pseudomonas aeruginosa AZPAE14359	100.0	315
Pseudomonas aeruginosa Pae_CF67.04p	100.0	315
Pseudomonas aeruginosa ATCC 33352	100.0	315
Pseudomonas aeruginosa isolate 180	100.0	315
Pseudomonas aeruginosa isolate 58	100.0	315
Pseudomonas aeruginosa PA100	100.0	315
Pseudomonas aeruginosa VET-56	100.0	315
Pseudomonas aeruginosa PAO1, isolate 2017-A	100.0	315
Pseudomonas aeruginosa PA-CL521b	100.0	315
Pseudomonas aeruginosa AZPAE14353	100.0	315
Pseudomonas aeruginosa Pae_CF67.02e	100.0	315
Pseudomonas aeruginosa ATCC 33355	100.0	315
Pseudomonas aeruginosa COPD2d	100.0	315
Pseudomonas aeruginosa isolate 28	100.0	315
Pseudomonas aeruginosa PAS7	100.0	315
Pseudomonas aeruginosa VET-64	100.0	315
Pseudomonas aeruginosa PAO1, isolate 2017-H	100.0	315
Pseudomonas aeruginosa PA-CL521a	100.0	315
Pseudomonas aeruginosa AZPAE14723	100.0	315
Pseudomonas aeruginosa Pae_CF67.02n	100.0	315
Pseudomonas aeruginosa ATCC 33362	100.0	315
Pseudomonas aeruginosa isolate 368	100.0	315
Pseudomonas aeruginosa 560747	100.0	315
Pseudomonas aeruginosa PASGNDM586	100.0	315
Pseudomonas aeruginosa VET-61	100.0	315
Pseudomonas aeruginosa PAO1, isolate 2017-C	100.0	315
Pseudomonas aeruginosa PA-CL520	100.0	315
Pseudomonas aeruginosa AZPAE13879	100.0	315
Pseudomonas aeruginosa Pae_CF67.02p	100.0	315
Pseudomonas aeruginosa WH-SGI-V-07058	100.0	315
Pseudomonas aeruginosa isolate 202	100.0	315
Pseudomonas aeruginosa isolate 371	100.0	315
Pseudomonas aeruginosa PA33	100.0	315
Pseudomonas aeruginosa HUM-321-D1	100.0	315
Pseudomonas aeruginosa PAO1, isolate 2017-B	100.0	315
Pseudomonas aeruginosa PA-CL519	100.0	315
Pseudomonas aeruginosa AZPAE14710	100.0	315
Pseudomonas aeruginosa Pae_CF67.02o	100.0	315
Pseudomonas aeruginosa WH-SGI-V-07057	100.0	315
Pseudomonas aeruginosa AR_0105	100.0	315
Pseudomonas aeruginosa isolate 260	100.0	315
Pseudomonas aeruginosa S432_C09_RS	100.0	315
Pseudomonas aeruginosa VET-24	100.0	315
Pseudomonas aeruginosa PAO1, isolate 2017-I	100.0	315
Pseudomonas aeruginosa PA-CL512	100.0	315
Pseudomonas aeruginosa AZPAE14716	100.0	315
Pseudomonas aeruginosa Pae_CF67.02r	100.0	315
Pseudomonas aeruginosa WH-SGI-V-07074	100.0	315
Pseudomonas aeruginosa isolate 121	100.0	315
Pseudomonas aeruginosa isolate 395	100.0	315
Pseudomonas aeruginosa Pae160	100.0	315
Pseudomonas aeruginosa HUM-236	100.0	315
Pseudomonas aeruginosa PAO1, isolate 2017-D	100.0	315
Pseudomonas aeruginosa PA-CL511	100.0	315
Pseudomonas aeruginosa AZPAE13850	100.0	315
Pseudomonas aeruginosa Pae_CF67.02t	100.0	315
Pseudomonas aeruginosa WH-SGI-V-07073	100.0	315
Pseudomonas aeruginosa TRN6633	100.0	315
Pseudomonas aeruginosa isolate 218	100.0	315
Pseudomonas aeruginosa PASGNDM699	100.0	315
Pseudomonas aeruginosa HUM-342	100.0	315
Pseudomonas aeruginosa GIMC5015:PAKB6	100.0	315
Pseudomonas aeruginosa PA-CL510	100.0	315
Pseudomonas aeruginosa AZPAE13757	100.0	315
Pseudomonas aeruginosa Pae_CF67.03d	100.0	315
Pseudomonas aeruginosa WH-SGI-V-07071	100.0	315
Pseudomonas aeruginosa isolate 92	100.0	315
Pseudomonas aeruginosa W15Dec3	100.0	315
Pseudomonas aeruginosa W1j	100.0	315
Pseudomonas aeruginosa HUM-282	100.0	315
Pseudomonas aeruginosa MRSN8139	100.0	315
Pseudomonas aeruginosa PA-CL524	100.0	315
Pseudomonas aeruginosa AZPAE14828	100.0	315
Pseudomonas aeruginosa Pae_CF67.03e	100.0	315
Pseudomonas aeruginosa WH-SGI-V-07063	100.0	315
Pseudomonas aeruginosa isolate 266	100.0	315
Pseudomonas aeruginosa isolate 369	100.0	315
Pseudomonas aeruginosa PA4	100.0	315
Pseudomonas aeruginosa HUM-534	100.0	315
Pseudomonas aeruginosa MRSN8912	100.0	315
Pseudomonas aeruginosa PA-CL518	100.0	315
Pseudomonas aeruginosa AZPAE14826	100.0	315
Pseudomonas aeruginosa Pae_CF67.03f	100.0	315
Pseudomonas aeruginosa WH-SGI-V-07070	100.0	315
Pseudomonas aeruginosa isolate 321	100.0	315
Pseudomonas aeruginosa isolate 201.1	100.0	315
Pseudomonas aeruginosa 4014	100.0	315
Pseudomonas aeruginosa HUM-227	100.0	315
Pseudomonas aeruginosa MRSN7014	100.0	315
Pseudomonas aeruginosa PA-CL517	100.0	315
Pseudomonas aeruginosa AZPAE14825	100.0	315
Pseudomonas aeruginosa Pae_CF67.03h	100.0	315
Pseudomonas aeruginosa WH-SGI-V-07051	100.0	315
Pseudomonas aeruginosa isolate 124.1	100.0	315
Pseudomonas aeruginosa isolate 87	100.0	315
Pseudomonas aeruginosa Pae111	100.0	315
Pseudomonas aeruginosa VET-27	100.0	315
Pseudomonas aeruginosa MRSN6678	100.0	315
Pseudomonas aeruginosa PA-CL509	100.0	315
Pseudomonas aeruginosa AZPAE14823	100.0	315
Pseudomonas aeruginosa Pae_CF67.03i	100.0	315
Pseudomonas aeruginosa WH-SGI-V-07066	100.0	315
Pseudomonas aeruginosa isolate 122	100.0	315
Pseudomonas aeruginosa isolate LRJ14	100.0	315
Pseudomonas aeruginosa SJU-R8_2	100.0	315
Pseudomonas aeruginosa ENV-245	100.0	315
Pseudomonas aeruginosa MRSN5524	100.0	315
Pseudomonas aeruginosa PAC97A	100.0	315
Pseudomonas aeruginosa AZPAE14818	100.0	315
Pseudomonas aeruginosa Pae_CF67.03m	100.0	315
Pseudomonas aeruginosa WH-SGI-V-07069	100.0	315
Pseudomonas aeruginosa SCH_ABX20	100.0	315
Pseudomonas aeruginosa isolate 181	100.0	315
Pseudomonas aeruginosa FFUP_PS_12	100.0	315
Pseudomonas aeruginosa HUM-387	100.0	315
Pseudomonas aeruginosa MRSN5539	100.0	315
Pseudomonas aeruginosa PAC91A	100.0	315
Pseudomonas aeruginosa AZPAE14812	100.0	315
Pseudomonas aeruginosa Pae_CF67.03o	100.0	315
Pseudomonas aeruginosa WH-SGI-V-07166	100.0	315
Pseudomonas sp HMSC058C05	100.0	315
Pseudomonas aeruginosa isolate 123	100.0	315
Pseudomonas aeruginosa CCBH17348	100.0	315
Pseudomonas aeruginosa HUM-296	100.0	315
Pseudomonas aeruginosa MRSN5519	100.0	315
Pseudomonas aeruginosa PAC76A	100.0	315
Pseudomonas aeruginosa AZPAE14810	100.0	315
Pseudomonas aeruginosa Pae_CF67.03q	100.0	315
Pseudomonas aeruginosa WH-SGI-V-07167	100.0	315
Pseudomonas aeruginosa isolate LRJ01.2	100.0	315
Pseudomonas aeruginosa isolate 358	100.0	315
Pseudomonas aeruginosa PAL1.1	100.0	315
Pseudomonas aeruginosa 268	100.0	315
Pseudomonas aeruginosa MRSN4841	100.0	315
Pseudomonas aeruginosa PAC60A	100.0	315
Pseudomonas aeruginosa AZPAE14809	100.0	315
Pseudomonas aeruginosa Pae_CF67.03r	100.0	315
Pseudomonas aeruginosa WH-SGI-V-07169	100.0	315
Pseudomonas aeruginosa isolate LRJ02	100.0	315
Pseudomonas aeruginosa isolate 29.1	100.0	315
Pseudomonas aeruginosa isolate 54	100.0	315
Pseudomonas aeruginosa Pa1078	100.0	315
Pseudomonas aeruginosa MRSN5498	100.0	315
Pseudomonas aeruginosa PAC127B	100.0	315
Pseudomonas aeruginosa AZPAE14732	100.0	315
Pseudomonas aeruginosa Pae_CF67.04c	100.0	315
Pseudomonas aeruginosa WH-SGI-V-07177	100.0	315
Pseudomonas aeruginosa isolate 413	100.0	315
Pseudomonas aeruginosa 514747	100.0	315
Pseudomonas aeruginosa env189	100.0	315
Pseudomonas aeruginosa Pa885	100.0	315
Pseudomonas aeruginosa MRSN443463	100.0	315
Pseudomonas aeruginosa PAC38A	100.0	315
Pseudomonas aeruginosa AZPAE14726	100.0	315
Pseudomonas aeruginosa Pae_CF67.04f	100.0	315
Pseudomonas aeruginosa WH-SGI-V-07181	100.0	315
Pseudomonas aeruginosa isolate 211	100.0	315
Pseudomonas aeruginosa FFUP_PS_CB5	100.0	315
Pseudomonas aeruginosa env334	100.0	315
Pseudomonas aeruginosa Pa347	100.0	315
Pseudomonas aeruginosa MRSN315	100.0	315
Pseudomonas aeruginosa PAC98D	100.0	315
Pseudomonas aeruginosa AZPAE14703	100.0	315
Pseudomonas aeruginosa Pae_CF67.04k	100.0	315
Pseudomonas aeruginosa WH-SGI-V-07184	100.0	315
Pseudomonas aeruginosa AR_0094	100.0	315
Pseudomonas aeruginosa PASGNDM590	100.0	315
Pseudomonas aeruginosa env109b	100.0	315
Pseudomonas aeruginosa Pa359	100.0	315
Pseudomonas aeruginosa MRSN19711	100.0	315
Pseudomonas aeruginosa PAC80A	100.0	315
Pseudomonas aeruginosa AZPAE14702	100.0	315
Pseudomonas aeruginosa Pae_CF67.04l	100.0	315
Pseudomonas aeruginosa WH-SGI-V-07186	100.0	315
Pseudomonas aeruginosa isolate 192	100.0	315
Pseudomonas aeruginosa PA35	100.0	315
Pseudomonas aeruginosa FFUP_PS_35	100.0	315
Pseudomonas aeruginosa 2C22, isolate 57P31PA	100.0	315
Pseudomonas aeruginosa MRSN20190	100.0	315
Pseudomonas aeruginosa PAC70B	100.0	315
Pseudomonas aeruginosa AZPAE14700	100.0	315
Pseudomonas aeruginosa Pae_CF67.04m	100.0	315
Pseudomonas aeruginosa WH-SGI-V-07187	100.0	315
Pseudomonas aeruginosa isolate 254	100.0	315
Pseudomonas aeruginosa Ps04	100.0	315
Pseudomonas aeruginosa env043	100.0	315
Pseudomonas aeruginosa 39016	100.0	315
Pseudomonas aeruginosa MRSN9718	100.0	315
Pseudomonas aeruginosa PAC31B	100.0	315
Pseudomonas aeruginosa AZPAE14694	100.0	315
Pseudomonas aeruginosa Pae_CF67.04q	100.0	315
Pseudomonas aeruginosa WH-SGI-V-07188	100.0	315
Pseudomonas aeruginosa isolate 216	100.0	315
Pseudomonas aeruginosa LIM1030	100.0	315
Pseudomonas aeruginosa PA77	100.0	315
Pseudomonas aeruginosa 6D92	100.0	315
Pseudomonas aeruginosa MRSN5508	100.0	315
Pseudomonas aeruginosa PAC70A	100.0	315
Pseudomonas aeruginosa AZPAE14692	100.0	315
Pseudomonas aeruginosa Pae_CF67.04r	100.0	315
Pseudomonas aeruginosa WH-SGI-V-07226	100.0	315
Pseudomonas aeruginosa CLB24405	100.0	315
Pseudomonas aeruginosa S658_C13_RS	100.0	315
Pseudomonas aeruginosa env146b	100.0	315
Pseudomonas aeruginosa 6D92	100.0	315
Pseudomonas aeruginosa MRSN435288	100.0	315
Pseudomonas aeruginosa PAC94A	100.0	315
Pseudomonas aeruginosa AZPAE14690	100.0	315
Pseudomonas aeruginosa Pae_CF67.02f	100.0	315
Pseudomonas aeruginosa WH-SGI-V-07228	100.0	315
Pseudomonas aeruginosa SCH_ABX09	100.0	315
Pseudomonas aeruginosa S440_C09_BS	100.0	315
Pseudomonas aeruginosa EGD-AQ8	100.0	315
Pseudomonas aeruginosa 239A, isolate 13121-1	100.0	315
Pseudomonas aeruginosa MRSN18754	100.0	315
Pseudomonas aeruginosa PAC22A	100.0	315
Pseudomonas aeruginosa AZPAE14688	100.0	315
Pseudomonas aeruginosa Pae_CF67.02h	100.0	315
Pseudomonas aeruginosa WH-SGI-V-07229	100.0	315
Pseudomonas aeruginosa isolate 311.1	100.0	315
Pseudomonas aeruginosa S794_C17_BS	100.0	315
Pseudomonas aeruginosa PB369	100.0	315
Pseudomonas aeruginosa 1BAE, isolate KK1	100.0	315
Pseudomonas aeruginosa MRSN436311	100.0	315
Pseudomonas aeruginosa PAC84A	100.0	315
Pseudomonas aeruginosa AZPAE14566	100.0	315
Pseudomonas aeruginosa Pae_CF67.02j	100.0	315
Pseudomonas aeruginosa WH-SGI-V-07232	100.0	315
Pseudomonas aeruginosa isolate 372	100.0	315
Pseudomonas aeruginosa PASGNDM592	100.0	315
Pseudomonas aeruginosa PA102	100.0	315
Pseudomonas aeruginosa F429, isolate A5803	100.0	315
Pseudomonas aeruginosa MRSN373401	100.0	315
Pseudomonas aeruginosa PAC56A	100.0	315
Pseudomonas aeruginosa AZPAE14570	100.0	315
Pseudomonas aeruginosa Pae_CF67.03b	100.0	315
Pseudomonas aeruginosa WH-SGI-V-07237	100.0	315
Pseudomonas aeruginosa isolate 117	100.0	315
Pseudomonas aeruginosa Pae113	100.0	315
Pseudomonas aeruginosa 903	100.0	315
Pseudomonas aeruginosa F462, isolate CPHL9433	100.0	315
Pseudomonas aeruginosa MRSN29192	100.0	315
Pseudomonas aeruginosa PAC17A	100.0	315
Pseudomonas aeruginosa AZPAE14550	100.0	315
Pseudomonas aeruginosa Pae_CF67.02q	100.0	315
Pseudomonas aeruginosa WH-SGI-V-07243	100.0	315
Pseudomonas aeruginosa isolate 396	100.0	315
Pseudomonas aeruginosa SJU-W4_3	100.0	315
Pseudomonas aeruginosa PB368	100.0	315
Pseudomonas aeruginosa AF9A, isolate AA2	100.0	315
Pseudomonas aeruginosa MRSN2444	100.0	315
Pseudomonas aeruginosa PAC117B	100.0	315
Pseudomonas aeruginosa AZPAE14829	100.0	315
Pseudomonas aeruginosa Pae_CF67.03g	100.0	315
Pseudomonas aeruginosa WH-SGI-V-07244	100.0	315
Pseudomonas aeruginosa TRN6598	100.0	315
Pseudomonas aeruginosa S292_C06_RS	100.0	315
Pseudomonas aeruginosa AR_458	100.0	315
Pseudomonas aeruginosa D429	100.0	315
Pseudomonas aeruginosa MRSN3587	100.0	315
Pseudomonas aeruginosa PAC38B	100.0	315
Pseudomonas aeruginosa AZPAE14830	100.0	315
Pseudomonas aeruginosa Pae_CF67.03k	100.0	315
Pseudomonas aeruginosa WH-SGI-V-07368	100.0	315
Pseudomonas aeruginosa isolate 118	100.0	315
Pseudomonas aeruginosa env159b	100.0	315
Pseudomonas aeruginosa env133	100.0	315
Pseudomonas aeruginosa EC22, isolate AUS52	100.0	315
Pseudomonas aeruginosa MRSN1938	100.0	315
Pseudomonas aeruginosa PAC127A	100.0	315
Pseudomonas aeruginosa AZPAE14912	100.0	315
Pseudomonas aeruginosa Pae_CF67.03l	100.0	315
Pseudomonas aeruginosa WH-SGI-V-07369	100.0	315
Pseudomonas aeruginosa isolate 334	100.0	315
Pseudomonas aeruginosa 2671	100.0	315
Pseudomonas aeruginosa E6130952	100.0	315
Pseudomonas aeruginosa ER06896	100.0	315
Pseudomonas aeruginosa MRSN1902	100.0	315
Pseudomonas aeruginosa PAC98B	100.0	315
Pseudomonas aeruginosa AZPAE14916	100.0	315
Pseudomonas aeruginosa Pae_CF67.04a	100.0	315
Pseudomonas aeruginosa WH-SGI-V-07372	100.0	315
Pseudomonas aeruginosa isolate 209	100.0	315
Pseudomonas aeruginosa Pa1207	100.0	315
Pseudomonas aeruginosa AR_0443	100.0	315
Pseudomonas aeruginosa PS00100	100.0	315
Pseudomonas aeruginosa MRSN17849	100.0	315
Pseudomonas aeruginosa PAC98C	100.0	315
Pseudomonas aeruginosa AZPAE14911	100.0	315
Pseudomonas aeruginosa Pae_CF67.04b	100.0	315
Pseudomonas aeruginosa WH-SGI-V-07374	100.0	315
Pseudomonas aeruginosa isolate 239	100.0	315
Pseudomonas aeruginosa 265	100.0	315
Pseudomonas aeruginosa M1608	100.0	315
Pseudomonas aeruginosa BA15561	100.0	315
Pseudomonas aeruginosa MRSN18970	100.0	315
Pseudomonas aeruginosa PAC42A	100.0	315
Pseudomonas aeruginosa AZPAE14940	100.0	315
Pseudomonas aeruginosa Pae_CF67.04e	100.0	315
Pseudomonas aeruginosa WH-SGI-V-07377	100.0	315
Pseudomonas sp HMSC067G02	100.0	315
Pseudomonas aeruginosa PA82	100.0	315
Pseudomonas aeruginosa NA04	100.0	315
Pseudomonas aeruginosa SP4528	100.0	315
Pseudomonas aeruginosa MRSN16744	100.0	315
Pseudomonas aeruginosa PAC56B	100.0	315
Pseudomonas aeruginosa AZPAE14934	100.0	315
Pseudomonas aeruginosa Pae_CF67.04h	100.0	315
Pseudomonas aeruginosa WH-SGI-V-07378	100.0	315
Pseudomonas aeruginosa isolate 190	100.0	315
Pseudomonas aeruginosa 837	100.0	315
Pseudomonas aeruginosa Pae100	100.0	315
Pseudomonas aeruginosa 163940	100.0	315
Pseudomonas aeruginosa MRSN16740	100.0	315
Pseudomonas aeruginosa PAC13C	100.0	315
Pseudomonas aeruginosa AZPAE14914	100.0	315
Pseudomonas aeruginosa Pae_CF67.04i	100.0	315
Pseudomonas aeruginosa WH-SGI-V-07379	100.0	315
Pseudomonas sp HMSC067F09	100.0	315
Pseudomonas aeruginosa nmrcch-6-2018	100.0	315
Pseudomonas aeruginosa PA55	100.0	315
Pseudomonas aeruginosa PS1	100.0	315
Pseudomonas aeruginosa MRSN16383	100.0	315
Pseudomonas aeruginosa PAC13A	100.0	315
Pseudomonas aeruginosa AZPAE14930	100.0	315
Pseudomonas aeruginosa Pae_CF67.04n	100.0	315
Pseudomonas aeruginosa WH-SGI-V-07380	100.0	315
Pseudomonas aeruginosa isolate 22	100.0	315
Pseudomonas aeruginosa PAS2	100.0	315
Pseudomonas aeruginosa PAS9	100.0	315
Pseudomonas aeruginosa H25883	100.0	315
Pseudomonas aeruginosa MRSN1613	100.0	315
Pseudomonas aeruginosa PAC79A	100.0	315
Pseudomonas aeruginosa AZPAE14913	100.0	315
Pseudomonas aeruginosa Pae_CF67.04o	100.0	315
Pseudomonas aeruginosa WH-SGI-V-07056	100.0	315
Pseudomonas aeruginosa isolate 362	100.0	315
Pseudomonas aeruginosa BK3	100.0	315
Pseudomonas aeruginosa HIAE_PA20	100.0	315
Pseudomonas aeruginosa FDAARGOS_532	100.0	315
Pseudomonas aeruginosa MRSN1601	100.0	315
Pseudomonas aeruginosa PAC79B	100.0	315
Pseudomonas aeruginosa AZPAE14921	100.0	315
Pseudomonas aeruginosa Pae_CF67.04s	100.0	315
Pseudomonas aeruginosa WH-SGI-V-07053	100.0	315
Pseudomonas aeruginosa isolate 377	100.0	315
Pseudomonas aeruginosa 585	100.0	315
Pseudomonas aeruginosa NCTC10727	100.0	315
Pseudomonas aeruginosa FDAARGOS_571	100.0	315
Pseudomonas aeruginosa MRSN1583	100.0	315
Pseudomonas aeruginosa PAC11A	100.0	315
Pseudomonas aeruginosa AZPAE14908	100.0	315
Pseudomonas aeruginosa Pae_CF67.04t	100.0	315
Pseudomonas aeruginosa WH-SGI-V-07054	100.0	315
Pseudomonas aeruginosa isolate LRJ07	100.0	315
Pseudomonas aeruginosa 833	100.0	315
Pseudomonas aeruginosa env169	100.0	315
Pseudomonas aeruginosa FDAARGOS_501	100.0	315
Pseudomonas aeruginosa MRSN1388	100.0	315
Pseudomonas aeruginosa PAC117A	100.0	315
Pseudomonas aeruginosa AZPAE14920	100.0	315
Pseudomonas aeruginosa Pae_CF67.05a	100.0	315
Pseudomonas aeruginosa WH-SGI-V-07170	100.0	315
Pseudomonas aeruginosa isolate 364	100.0	315
Pseudomonas aeruginosa Ocean-100	100.0	315
Pseudomonas aeruginosa NCTC8203	100.0	315
Pseudomonas aeruginosa FDAARGOS_505	100.0	315
Pseudomonas aeruginosa MRSN15678	100.0	315
Pseudomonas aeruginosa PAC13B	100.0	315
Pseudomonas aeruginosa AZPAE15033	100.0	315
Pseudomonas aeruginosa Pae_CF67.05b	100.0	315
Pseudomonas aeruginosa WH-SGI-V-07176	100.0	315
Pseudomonas aeruginosa TRN6609	100.0	315
Pseudomonas aeruginosa ATCC BAA-2114	100.0	315
Pseudomonas aeruginosa AR_0449	100.0	315
Pseudomonas aeruginosa E1-WATER-2	100.0	315
Pseudomonas aeruginosa MRSN14981	100.0	315
Pseudomonas aeruginosa PAC106A	100.0	315
Pseudomonas aeruginosa AZPAE14907	100.0	315
Pseudomonas aeruginosa Pae_CF67.05c	100.0	315
Pseudomonas aeruginosa WH-SGI-V-07179	100.0	315
Pseudomonas aeruginosa isolate 119	100.0	315
Pseudomonas aeruginosa H27930	100.0	315
Pseudomonas aeruginosa M26	100.0	315
Pseudomonas aeruginosa F1-DN-2	100.0	315
Pseudomonas aeruginosa MRSN30858	100.0	315
Pseudomonas aeruginosa 333S200112BSL_PA1	100.0	315
Pseudomonas aeruginosa AZPAE14932	100.0	315
Pseudomonas aeruginosa Pae_CF67.05d	100.0	315
Pseudomonas aeruginosa WH-SGI-V-07314	100.0	315
Pseudomonas sp HMSC064G05	100.0	315
Pseudomonas aeruginosa ATCC BAA-2111	100.0	315
Pseudomonas aeruginosa 6003	100.0	315
Pseudomonas aeruginosa PA-W32	100.0	315
Pseudomonas aeruginosa MRSN1925	100.0	315
Pseudomonas aeruginosa 326S290611BSL_PA2	100.0	315
Pseudomonas aeruginosa AZPAE14917	100.0	315
Pseudomonas aeruginosa Pae_CF67.05e	100.0	315
Pseudomonas aeruginosa WH-SGI-V-07317	100.0	315
Pseudomonas aeruginosa isolate 214	100.0	315
Pseudomonas aeruginosa S461_C10_RS	100.0	315
Pseudomonas aeruginosa PPF-20	100.0	315
Pseudomonas aeruginosa PA-W29	100.0	315
Pseudomonas aeruginosa MRSN25623	100.0	315
Pseudomonas aeruginosa PAC61A	100.0	315
Pseudomonas aeruginosa AZPAE14938	100.0	315
Pseudomonas aeruginosa Pae_CF67.05f	100.0	315
Pseudomonas aeruginosa WH-SGI-V-07224	100.0	315
Pseudomonas aeruginosa isolate 185	100.0	315
Pseudomonas aeruginosa PA404	100.0	315
Pseudomonas aeruginosa KCRI-377 isolate R0007_377	100.0	315
Pseudomonas aeruginosa PA-W33	100.0	315
Pseudomonas aeruginosa MRSN18562	100.0	315
Pseudomonas aeruginosa 320S290711BSL_PA2	100.0	315
Pseudomonas aeruginosa AZPAE14936	100.0	315
Pseudomonas aeruginosa Pae_CF67.05g	100.0	315
Pseudomonas aeruginosa WH-SGI-V-07230	100.0	315
Pseudomonas aeruginosa TRN6594	100.0	315
Pseudomonas aeruginosa AR_0440	100.0	315
Pseudomonas aeruginosa SJU-R10_3	100.0	315
Pseudomonas aeruginosa PA-W10	100.0	315
Pseudomonas aeruginosa MRSN1612	100.0	315
Pseudomonas aeruginosa 318S170811BSL_PA1	100.0	315
Pseudomonas aeruginosa AZPAE15069	100.0	315
Pseudomonas aeruginosa Pae_CF67.05h	100.0	315
Pseudomonas aeruginosa WH-SGI-V-07236	100.0	315
Pseudomonas aeruginosa CCF_795	100.0	315
Pseudomonas aeruginosa S422_C09_BS	100.0	315
Pseudomonas aeruginosa GER_MD14_1510_Pae_083	100.0	315
Pseudomonas aeruginosa AA43	100.0	315
Pseudomonas aeruginosa MRSN15753	100.0	315
Pseudomonas aeruginosa 318S170811BSL_PA2	100.0	315
Pseudomonas aeruginosa AZPAE15072	100.0	315
Pseudomonas aeruginosa Pae_CF67.05i	100.0	315
Pseudomonas aeruginosa WH-SGI-V-07239	100.0	315
Pseudomonas aeruginosa CLB24983	100.0	315
Pseudomonas aeruginosa env126	100.0	315
Pseudomonas aeruginosa KCRI-610 isolate RDK01_610	100.0	315
Pseudomonas aeruginosa PA-W4	100.0	315
Pseudomonas aeruginosa MRSN1380	100.0	315
Pseudomonas aeruginosa 274S010611BSL_PA1	100.0	315
Pseudomonas aeruginosa AZPAE15064	100.0	315
Pseudomonas aeruginosa Pae_CF67.05k	100.0	315
Pseudomonas aeruginosa WH-SGI-V-07242	100.0	315
Pseudomonas aeruginosa isolate 6-2	100.0	315
Pseudomonas aeruginosa PPF-13	100.0	315
Pseudomonas aeruginosa 138244	100.0	315
Pseudomonas aeruginosa AA44	100.0	315
Pseudomonas aeruginosa MRSN12914	100.0	315
Pseudomonas aeruginosa 293S080611BSL_PA2	100.0	315
Pseudomonas aeruginosa AZPAE15063	100.0	315
Pseudomonas aeruginosa Pae_CF67.05l	100.0	315
Pseudomonas aeruginosa WH-SGI-V-07246	100.0	315
Pseudomonas aeruginosa Kasamber	100.0	315
Pseudomonas aeruginosa ATCC BAA-2110	100.0	315
Pseudomonas aeruginosa HB15	100.0	315
Pseudomonas aeruginosa G1-WATER-2A	100.0	315
Pseudomonas aeruginosa MRSN11538	100.0	315
Pseudomonas aeruginosa 295s071211BSL_PA1	100.0	315
Pseudomonas aeruginosa AZPAE15061	100.0	315
Pseudomonas aeruginosa Pae_CF67.05m	100.0	315
Pseudomonas aeruginosa WH-SGI-V-07371	100.0	315
Pseudomonas aeruginosa 9AR3	100.0	315
Pseudomonas aeruginosa T38079	100.0	315
Pseudomonas aeruginosa C 1433	100.0	315
Pseudomonas aeruginosa AL363	100.0	315
Pseudomonas aeruginosa MRSN13488	100.0	315
Pseudomonas aeruginosa PAC46A	100.0	315
Pseudomonas aeruginosa AZPAE15060	100.0	315
Pseudomonas aeruginosa Pae_CF67.05n	100.0	315
Pseudomonas aeruginosa WH-SGI-V-07376	100.0	315
Pseudomonas aeruginosa isolate 75	100.0	315
Pseudomonas aeruginosa env179	100.0	315
Pseudomonas aeruginosa PAO581	100.0	315
Pseudomonas aeruginosa PA-W43	100.0	315
Pseudomonas aeruginosa MRSN1344	100.0	315
Pseudomonas aeruginosa PAC5B	100.0	315
Pseudomonas aeruginosa AZPAE15059	100.0	315
Pseudomonas aeruginosa Pae_CF67.05o	100.0	315
Pseudomonas aeruginosa WH-SGI-V-07384	100.0	315
Pseudomonas aeruginosa isolate 191	100.0	315
Pseudomonas aeruginosa SCH_ABX19	100.0	315
Pseudomonas aeruginosa C7447m	100.0	315
Pseudomonas aeruginosa PA-W21	100.0	315
Pseudomonas aeruginosa U4581	100.0	315
Pseudomonas aeruginosa 326S290611BSL_PA3	100.0	315
Pseudomonas aeruginosa AZPAE15055	100.0	315
Pseudomonas aeruginosa Pae_CF67.05p	100.0	315
Pseudomonas aeruginosa WH-SGI-V-07381	100.0	315
Pseudomonas aeruginosa P47	100.0	315
Pseudomonas aeruginosa S830_C17_BS	100.0	315
Pseudomonas aeruginosa PAO1-VE2	100.0	315
Pseudomonas aeruginosa E1	100.0	315
Pseudomonas aeruginosa FM4	100.0	315
Pseudomonas aeruginosa PAC5A	100.0	315
Pseudomonas aeruginosa AZPAE15023	100.0	315
Pseudomonas aeruginosa Pae_CF67.05s	100.0	315
Pseudomonas aeruginosa WH-SGI-V-07268	100.0	315
Pseudomonas aeruginosa 584004	100.0	315
Pseudomonas aeruginosa 8490	100.0	315
Pseudomonas aeruginosa PAO1-VE13	100.0	315
Pseudomonas aeruginosa JYH14	100.0	315
Pseudomonas aeruginosa BJ4	100.0	315
Pseudomonas aeruginosa 320S290711BSL_PA1	100.0	315
Pseudomonas aeruginosa AZPAE15019	100.0	315
Pseudomonas aeruginosa Pae_CF67.06h	100.0	315
Pseudomonas aeruginosa WH-SGI-V-07241	100.0	315
Pseudomonas aeruginosa isolate 57	100.0	315
Pseudomonas aeruginosa NCTC10782	100.0	315
Pseudomonas aeruginosa PA1	100.0	315
Pseudomonas aeruginosa JYH18	100.0	315
Pseudomonas aeruginosa HCF331	100.0	315
Pseudomonas aeruginosa 313s141011BSL_PA1	100.0	315
Pseudomonas aeruginosa AZPAE15015	100.0	315
Pseudomonas aeruginosa Pae_CF67.06j	100.0	315
Pseudomonas aeruginosa WH-SGI-V-07386	100.0	315
Pseudomonas aeruginosa isolate 124	100.0	315
Pseudomonas aeruginosa env110b	100.0	315
Pseudomonas aeruginosa PK6	100.0	315
Pseudomonas aeruginosa CF127	100.0	315
Pseudomonas aeruginosa HCF336	100.0	315
Pseudomonas aeruginosa 293S080611BSL_PA1	100.0	315
Pseudomonas aeruginosa AZPAE15010	100.0	315
Pseudomonas aeruginosa Pae_CF67.07b	100.0	315
Pseudomonas aeruginosa WH-SGI-V-07387	100.0	315
Pseudomonas aeruginosa isolate 55	100.0	315
Pseudomonas aeruginosa env193	100.0	315
Pseudomonas aeruginosa JD303	100.0	315
Pseudomonas aeruginosa E2	100.0	315
Pseudomonas aeruginosa HCF5	100.0	315
Pseudomonas aeruginosa 197S020911BSL_PA3	100.0	315
Pseudomonas aeruginosa AZPAE15006	100.0	315
Pseudomonas aeruginosa Pae_CF67.07d	100.0	315
Pseudomonas aeruginosa WH-SGI-V-07389	100.0	315
Pseudomonas aeruginosa TRN6622	100.0	315
Pseudomonas aeruginosa 2330	100.0	315
Pseudomonas aeruginosa JD324	100.0	315
Pseudomonas aeruginosa U2504	100.0	315
Pseudomonas aeruginosa HCF86	100.0	315
Pseudomonas aeruginosa 197S020911BSL_PA4	100.0	315
Pseudomonas aeruginosa AZPAE15005	100.0	315
Pseudomonas aeruginosa Pae_CF67.07e	100.0	315
Pseudomonas aeruginosa WH-SGI-V-07390	100.0	315
Pseudomonas aeruginosa isolate 76	100.0	315
Pseudomonas aeruginosa S39_C01_BS	100.0	315
Pseudomonas aeruginosa BK1	100.0	315
Pseudomonas aeruginosa JJ692	100.0	315
Pseudomonas aeruginosa HCF55	100.0	315
Pseudomonas aeruginosa 197S020911BSL_PA2	100.0	315
Pseudomonas aeruginosa AZPAE15004	100.0	315
Pseudomonas aeruginosa Pae_CF67.07f	100.0	315
Pseudomonas aeruginosa WH-SGI-V-07281	100.0	315
Pseudomonas sp HMSC076A11	100.0	315
Pseudomonas aeruginosa Pae102	100.0	315
Pseudomonas aeruginosa PA96	100.0	315
Pseudomonas aeruginosa B9	100.0	315
Pseudomonas aeruginosa HCF19	100.0	315
Pseudomonas aeruginosa 197S020911BSL_PA1	100.0	315
Pseudomonas aeruginosa AZPAE15003	100.0	315
Pseudomonas aeruginosa Pae_CF67.07i	100.0	315
Pseudomonas aeruginosa WH-SGI-V-07405	100.0	315
Pseudomonas aeruginosa isolate 223	100.0	315
Pseudomonas aeruginosa M8A1	100.0	315
Pseudomonas aeruginosa 148	100.0	315
Pseudomonas aeruginosa B3	100.0	315
Pseudomonas aeruginosa Zw5	100.0	315
Pseudomonas aeruginosa 192S190811BSL_PA3	100.0	315
Pseudomonas aeruginosa AZPAE15000	100.0	315
Pseudomonas aeruginosa Pae_CF67.07m	100.0	315
Pseudomonas aeruginosa WH-SGI-V-07406	100.0	315
Pseudomonas aeruginosa isolate 180.1	100.0	315
Pseudomonas aeruginosa PAS6	100.0	315
Pseudomonas aeruginosa C0324C, isolate C0324C	100.0	315
Pseudomonas aeruginosa LiP10b	100.0	315
Pseudomonas aeruginosa PT12	100.0	315
Pseudomonas aeruginosa 192S190811BSL_PA2	100.0	315
Pseudomonas aeruginosa AZPAE14998	100.0	315
Pseudomonas aeruginosa Pae_CF67.07n	100.0	315
Pseudomonas aeruginosa WH-SGI-V-07413	100.0	315
Pseudomonas aeruginosa isolate 125	100.0	315
Pseudomonas aeruginosa S86968	100.0	315
Pseudomonas aeruginosa Pae_CF67.01e	100.0	315
Pseudomonas aeruginosa LiP10a	100.0	315
Pseudomonas aeruginosa Zw31	100.0	315
Pseudomonas aeruginosa 145S200511BSL_PA2	100.0	315
Pseudomonas aeruginosa AZPAE14995	100.0	315
Pseudomonas aeruginosa Pae_CF67.07p	100.0	315
Pseudomonas aeruginosa WH-SGI-V-07414	100.0	315
Pseudomonas aeruginosa isolate 177	100.0	315
Pseudomonas aeruginosa PAS1	100.0	315
Pseudomonas aeruginosa Pae_CF67.06t	100.0	315
Pseudomonas aeruginosa LiP7	100.0	315
Pseudomonas aeruginosa 32CFBRPA	100.0	315
Pseudomonas aeruginosa 175S070312EX2DAY21_PA1	100.0	315
Pseudomonas aeruginosa AZPAE14989	100.0	315
Pseudomonas aeruginosa Pae_CF67.07r	100.0	315
Pseudomonas aeruginosa WH-SGI-V-07415	100.0	315
Pseudomonas aeruginosa CCF_696	100.0	315
Pseudomonas aeruginosa S252_C06_RS	100.0	315
Pseudomonas aeruginosa Pae_CF67.08b	100.0	315
Pseudomonas aeruginosa LiP5	100.0	315
Pseudomonas aeruginosa SMC1587	100.0	315
Pseudomonas aeruginosa 136S260811BSL_PA1	100.0	315
Pseudomonas aeruginosa AZPAE14988	100.0	315
Pseudomonas aeruginosa Pae_CF67.08c	100.0	315
Pseudomonas aeruginosa WH-SGI-V-07383	100.0	315
Pseudomonas aeruginosa isolate 196	100.0	315
Pseudomonas aeruginosa SJU-S72_1	100.0	315
Pseudomonas aeruginosa WH-SGI-V-07252	100.0	315
Pseudomonas aeruginosa LiP2c	100.0	315
Pseudomonas aeruginosa Zw73_2	100.0	315
Pseudomonas aeruginosa 136S260811BSL_PA2	100.0	315
Pseudomonas aeruginosa AZPAE14985	100.0	315
Pseudomonas aeruginosa Pae_CF67.08d	100.0	315
Pseudomonas aeruginosa WH-SGI-V-07388	100.0	315
Pseudomonas aeruginosa isolate 262	100.0	315
Pseudomonas aeruginosa SJU-R8_3	100.0	315
Pseudomonas aeruginosa Hex1T	100.0	315
Pseudomonas aeruginosa LiP2b	100.0	315
Pseudomonas aeruginosa Zw64_2	100.0	315
Pseudomonas aeruginosa 37s051011BSL_PA1	100.0	315
Pseudomonas aeruginosa AZPAE14982	100.0	315
Pseudomonas aeruginosa Pae_CF67.08e	100.0	315
Pseudomonas aeruginosa WH-SGI-V-07404	100.0	315
Pseudomonas aeruginosa isolate 26	100.0	315
Pseudomonas aeruginosa 2253	100.0	315
Pseudomonas aeruginosa S86968	100.0	315
Pseudomonas aeruginosa LiP9	100.0	315
Pseudomonas aeruginosa HCF367	100.0	315
Pseudomonas aeruginosa 192S190811BSL_PA1	100.0	315
Pseudomonas aeruginosa AZPAE14981	100.0	315
Pseudomonas aeruginosa Pae_CF67.08f	100.0	315
Pseudomonas aeruginosa WH-SGI-V-07410	100.0	315
Pseudomonas aeruginosa isolate 318.1	100.0	315
Pseudomonas aeruginosa PA1	100.0	315
Pseudomonas aeruginosa T38079	100.0	315
Pseudomonas aeruginosa LiP1d	100.0	315
Pseudomonas aeruginosa HCF238	100.0	315
Pseudomonas aeruginosa 136S260811BSL_PA3	100.0	315
Pseudomonas aeruginosa AZPAE14979	100.0	315
Pseudomonas aeruginosa Pae_CF67.08g	100.0	315
Pseudomonas aeruginosa WH-SGI-V-07318	100.0	315
Pseudomonas aeruginosa isolate 413.1	100.0	315
Pseudomonas aeruginosa M8A4	100.0	315
Pseudomonas aeruginosa F23197	100.0	315
Pseudomonas aeruginosa LiP1c	100.0	315
Pseudomonas aeruginosa Zw9	100.0	315
Pseudomonas aeruginosa 4094345290	100.0	315
Pseudomonas aeruginosa AZPAE14976	100.0	315
Pseudomonas aeruginosa Pae_CF67.08h	100.0	315
Pseudomonas aeruginosa WH-SGI-V-07424	100.0	315
Pseudomonas aeruginosa isolate 120	100.0	315
Pseudomonas aeruginosa HIAE_PA14	100.0	315
Pseudomonas aeruginosa H5708	100.0	315
Pseudomonas aeruginosa LiP3	100.0	315
Pseudomonas aeruginosa Zw49	100.0	315
Pseudomonas aeruginosa PAC31A	100.0	315
Pseudomonas aeruginosa AZPAE14975	100.0	315
Pseudomonas aeruginosa Pae_CF67.08i	100.0	315
Pseudomonas aeruginosa WH-SGI-V-07425	100.0	315
Pseudomonas aeruginosa AR_0103	100.0	315
Pseudomonas aeruginosa env203	100.0	315
Pseudomonas aeruginosa H27930	100.0	315
Pseudomonas aeruginosa LiP2a	100.0	315
Pseudomonas aeruginosa PD1	100.0	315
Pseudomonas aeruginosa 175S070312EX2DAY21_PA2	100.0	315
Pseudomonas aeruginosa AZPAE15044	100.0	315
Pseudomonas aeruginosa Pae_CF67.08j	100.0	315
Pseudomonas aeruginosa WH-SGI-V-07426	100.0	315
Pseudomonas sp HMSC058A10	100.0	315
Pseudomonas aeruginosa S57_C01_BS	100.0	315
Pseudomonas aeruginosa M1608	100.0	315
Pseudomonas aeruginosa LiP1a	100.0	315
Pseudomonas aeruginosa MCF104	100.0	315
Pseudomonas aeruginosa 91	100.0	315
Pseudomonas aeruginosa AZPAE14972	100.0	315
Pseudomonas aeruginosa Pae_CF67.08k	100.0	315
Pseudomonas aeruginosa WH-SGI-V-07428	100.0	315
Pseudomonas aeruginosa isolate 394	100.0	315
Pseudomonas aeruginosa PA6	100.0	315
Pseudomonas aeruginosa FDAARGOS_340	100.0	315
Pseudomonas aeruginosa E2_H133420224	100.0	315
Pseudomonas aeruginosa MCF134	100.0	315
Pseudomonas aeruginosa 89	100.0	315
Pseudomonas aeruginosa AZPAE14971	100.0	315
Pseudomonas aeruginosa Pae_CF67.08l	100.0	315
Pseudomonas aeruginosa WH-SGI-V-07427	100.0	315
Pseudomonas aeruginosa isolate 17	100.0	315
Pseudomonas aeruginosa PAS4	100.0	315
Pseudomonas aeruginosa DMC-27b	100.0	315
Pseudomonas aeruginosa JYH10	100.0	315
Pseudomonas aeruginosa H2	100.0	315
Pseudomonas aeruginosa 32	100.0	315
Pseudomonas aeruginosa AZPAE14970	100.0	315
Pseudomonas aeruginosa Pae_CF67.08m	100.0	315
Pseudomonas aeruginosa WH-SGI-V-07485	100.0	315
Pseudomonas aeruginosa Li010	100.0	315
Pseudomonas aeruginosa env135	100.0	315
Pseudomonas fluorescens NCTC10783	100.0	315
Pseudomonas aeruginosa DUN-002C	100.0	315
Pseudomonas aeruginosa MCF182	100.0	315
Pseudomonas aeruginosa Pyo24	100.0	315
Pseudomonas aeruginosa AZPAE14969	100.0	315
Pseudomonas aeruginosa Pae_CF67.08n	100.0	315
Pseudomonas aeruginosa NCTC10332; NCTC10332	100.0	315
Pseudomonas aeruginosa isolate 37	100.0	315
Pseudomonas aeruginosa PASGNDM591	100.0	315
Pseudomonas aeruginosa PAO1-CipR	100.0	315
Pseudomonas aeruginosa JYH8	100.0	315
Pseudomonas aeruginosa MCF149	100.0	315
Pseudomonas aeruginosa BWH047	100.0	315
Pseudomonas aeruginosa AZPAE14968	100.0	315
Pseudomonas aeruginosa Pae_CF67.08o	100.0	315
Pseudomonas aeruginosa WH-SGI-V-07487	100.0	315
Pseudomonas aeruginosa CLB24226	100.0	315
Pseudomonas aeruginosa DZ-B1	100.0	315
Pseudomonas aeruginosa PAO1	100.0	315
Pseudomonas aeruginosa CF5	100.0	315
Pseudomonas aeruginosa MCF206	100.0	315
Pseudomonas aeruginosa Pyo5	100.0	315
Pseudomonas aeruginosa AZPAE14967	100.0	315
Pseudomonas aeruginosa Pae_CF67.08p	100.0	315
Pseudomonas aeruginosa WH-SGI-V-07488	100.0	315
Pseudomonas aeruginosa isolate 197	100.0	315
Pseudomonas aeruginosa F23197	100.0	315
Pseudomonas aeruginosa RB	100.0	315
Pseudomonas aeruginosa C8	100.0	315
Pseudomonas aeruginosa JYH29	100.0	315
Pseudomonas aeruginosa FDAARGOS_767	100.0	315
Pseudomonas aeruginosa AZPAE14962	100.0	315
Pseudomonas aeruginosa Pae_CF67.08q	100.0	315
Pseudomonas aeruginosa WH-SGI-V-07490	100.0	315
Pseudomonas aeruginosa DSM 50071	100.0	315
Pseudomonas aeruginosa 506	100.0	315
Pseudomonas aeruginosa C1913C, isolate C1913C	100.0	315
Pseudomonas aeruginosa A3	100.0	315
Pseudomonas aeruginosa JYH25	100.0	315
Pseudomonas aeruginosa isolate paerg005	100.0	315
Pseudomonas aeruginosa AZPAE14959	100.0	315
Pseudomonas aeruginosa Pae_CF67.08r	100.0	315
Pseudomonas aeruginosa WH-SGI-V-07496	100.0	315
Pseudomonas aeruginosa isolate 213	100.0	315
Pseudomonas aeruginosa 151 Assistante	100.0	315
Pseudomonas aeruginosa C2159M, isolate C2159M	100.0	315
Pseudomonas aeruginosa A1	100.0	315
Pseudomonas aeruginosa JYH9	100.0	315
Pseudomonas aeruginosa isolate paerg009	100.0	315
Pseudomonas aeruginosa AZPAE14954	100.0	315
Pseudomonas aeruginosa Pae_CF67.08s	100.0	315
Pseudomonas aeruginosa 12-4-4	100.0	315
Pseudomonas aeruginosa isolate 414	100.0	315
Pseudomonas aeruginosa NCTC8506	100.0	315
Pseudomonas aeruginosa Pae_CF67.01a	100.0	315
Pseudomonas aeruginosa C7	100.0	315
Pseudomonas aeruginosa T3382	100.0	315
Pseudomonas aeruginosa NCTC12903	100.0	315
Pseudomonas aeruginosa AZPAE14953	100.0	315
Pseudomonas aeruginosa Pae_CF67.08t	100.0	315
Pseudomonas aeruginosa WH-SGI-V-07498	100.0	315
Pseudomonas aeruginosa isolate 127.1	100.0	315
Pseudomonas aeruginosa UQCCR 393788042 K AB94	100.0	315
Pseudomonas aeruginosa Pae_CF67.01c	100.0	315
Pseudomonas aeruginosa S54485	100.0	315
Pseudomonas aeruginosa E2758	100.0	315
Pseudomonas aeruginosa NCTC13715	100.0	315
Pseudomonas aeruginosa AZPAE14952	100.0	315
Pseudomonas aeruginosa Pae_CF67.09a	100.0	315
Pseudomonas aeruginosa SMC4386_delta_CRISPR_Cas	100.0	315
Pseudomonas aeruginosa isolate 183	100.0	315
Pseudomonas aeruginosa S442_C09_BS	100.0	315
Pseudomonas aeruginosa Pae_CF67.01h	100.0	315
Pseudomonas aeruginosa LiP12	100.0	315
Pseudomonas aeruginosa U2816	100.0	315
Pseudomonas aeruginosa NCTC10728	100.0	315
Pseudomonas aeruginosa AZPAE14949	100.0	315
Pseudomonas aeruginosa Pae_CF67.09b	100.0	315
Pseudomonas aeruginosa WH-SGI-V-07504	100.0	315
Pseudomonas aeruginosa isolate 133_Pseudo_aeruginosa	100.0	315
Pseudomonas aeruginosa 8491	100.0	315
Pseudomonas aeruginosa Pae_CF67.02b	100.0	315
Pseudomonas aeruginosa LiP14	100.0	315
Pseudomonas aeruginosa 2810	100.0	315
Pseudomonas aeruginosa XDR-PA / assembly AND01-016	100.0	315
Pseudomonas aeruginosa AZPAE15052	100.0	315
Pseudomonas aeruginosa Pae_CF67.09d	100.0	315
Pseudomonas aeruginosa SMC4389	100.0	315
Pseudomonas aeruginosa isolate 207	100.0	315
Pseudomonas aeruginosa BK2	100.0	315
Pseudomonas aeruginosa Hex1T	100.0	315
Pseudomonas aeruginosa LiP13	100.0	315
Pseudomonas aeruginosa P2404	100.0	315
Pseudomonas aeruginosa XDR-PA / assembly AND01-040	100.0	315
Pseudomonas aeruginosa AZPAE14945	100.0	315
Pseudomonas aeruginosa Pae_CF67.09c	100.0	315
Pseudomonas aeruginosa SMC4386	100.0	315
Pseudomonas aeruginosa isolate PcyII-10	100.0	315
Pseudomonas aeruginosa SJU-W20_2	100.0	315
Pseudomonas aeruginosa ATCC 27853	100.0	315
Pseudomonas aeruginosa LiP11	100.0	315
Pseudomonas aeruginosa W15Apr4	100.0	315
Pseudomonas aeruginosa XDR-PA / assembly AND01-030	100.0	315
Pseudomonas aeruginosa AZPAE15026	100.0	315
Pseudomonas aeruginosa Pae_CF67.09e	100.0	315
Pseudomonas aeruginosa WH-SGI-V-07619	100.0	315
Pseudomonas aeruginosa isolate 85	100.0	315
Pseudomonas aeruginosa S823_C17_RS	100.0	315
Pseudomonas aeruginosa AR_0090	100.0	315
Pseudomonas aeruginosa LiP8	100.0	315
Pseudomonas aeruginosa Jp222	100.0	315
Pseudomonas aeruginosa XDR-PA / assembly AND02-001	100.0	315
Pseudomonas aeruginosa AZPAE14943	100.0	315
Pseudomonas aeruginosa Pae_CF67.09f	100.0	315
Pseudomonas aeruginosa WH-SGI-V-07621	100.0	315
Pseudomonas aeruginosa TRN6637	100.0	315
Pseudomonas aeruginosa HIAE_PA12	100.0	315
Pseudomonas aeruginosa AUH-PA43	100.0	315
Pseudomonas aeruginosa LiP6	100.0	315
Pseudomonas aeruginosa Jp100	100.0	315
Pseudomonas aeruginosa XDR-PA / assembly AND02-023	100.0	315
Pseudomonas aeruginosa AZPAE14928	100.0	315
Pseudomonas aeruginosa Pae_CF67.09g	100.0	315
Pseudomonas aeruginosa WH-SGI-V-07622	100.0	315
Pseudomonas aeruginosa isolate 203	100.0	315
Pseudomonas aeruginosa PAS8	100.0	315
Pseudomonas aeruginosa AUH-PA120	100.0	315
Pseudomonas aeruginosa LiP4	100.0	315
Pseudomonas aeruginosa AMT0005-136	100.0	315
Pseudomonas aeruginosa XDR-PA / assembly AND03-050	100.0	315
Pseudomonas aeruginosa AZPAE14926	100.0	315
Pseudomonas aeruginosa Pae_CF67.09h	100.0	315
Pseudomonas aeruginosa WH-SGI-V-07626	100.0	315
Pseudomonas aeruginosa isolate 126.1	100.0	315
Pseudomonas aeruginosa PASGNDM544	100.0	315
Pseudomonas aeruginosa AUH-PA132	100.0	315
Pseudomonas aeruginosa DUN-015A	100.0	315
Pseudomonas aeruginosa AMT0005-135	100.0	315
Pseudomonas aeruginosa XDR-PA / assembly AND04-037	100.0	315
Pseudomonas aeruginosa AZPAE14925	100.0	315
Pseudomonas aeruginosa Pae_CF67.09i	100.0	315
Pseudomonas aeruginosa WH-SGI-V-07627	100.0	315
Pseudomonas aeruginosa isolate 132	100.0	315
Pseudomonas aeruginosa AR_0353	100.0	315
Pseudomonas aeruginosa PABL092	100.0	315
Pseudomonas aeruginosa U350	100.0	315
Pseudomonas aeruginosa AUS449	100.0	315
Pseudomonas aeruginosa XDR-PA / assembly AND04-016	100.0	315
Pseudomonas aeruginosa AZPAE14924	100.0	315
Pseudomonas aeruginosa Pae_CF67.09j	100.0	315
Pseudomonas aeruginosa WH-SGI-V-07628	100.0	315
Pseudomonas aeruginosa 520374_526374	100.0	315
Pseudomonas aeruginosa 392	100.0	315
Pseudomonas aeruginosa PABL107	100.0	315
Pseudomonas aeruginosa U435	100.0	315
Pseudomonas aeruginosa AUS510	100.0	315
Pseudomonas aeruginosa XDR-PA / assembly AND06-033	100.0	315
Pseudomonas aeruginosa AZPAE14902	100.0	315
Pseudomonas aeruginosa Pae_CF67.09k	100.0	315
Pseudomonas aeruginosa WH-SGI-V-07630	100.0	315
Pseudomonas aeruginosa AR_0100	100.0	315
Pseudomonas aeruginosa Urg-7	100.0	315
Pseudomonas aeruginosa PABL108	100.0	315
Pseudomonas aeruginosa U421	100.0	315
Pseudomonas aeruginosa AUS501	100.0	315
Pseudomonas aeruginosa XDR-PA / assembly AND06-027	100.0	315
Pseudomonas aeruginosa AZPAE14900	100.0	315
Pseudomonas aeruginosa Pae_CF67.09l	100.0	315
Pseudomonas aeruginosa WH-SGI-V-07636	100.0	315
Pseudomonas aeruginosa isolate 208	100.0	315
Pseudomonas aeruginosa HIAE_PA22	100.0	315
Pseudomonas aeruginosa PABL106	100.0	315
Pseudomonas aeruginosa U372	100.0	315
Pseudomonas aeruginosa AUS178	100.0	315
Pseudomonas aeruginosa XDR-PA / assembly AND07-007	100.0	315
Pseudomonas aeruginosa AZPAE14894	100.0	315
Pseudomonas aeruginosa Pae_CF67.09m	100.0	315
Pseudomonas aeruginosa WH-SGI-V-07637	100.0	315
Pseudomonas aeruginosa isolate 256	100.0	315
Pseudomonas aeruginosa Pa124	100.0	315
Pseudomonas aeruginosa PABL104	100.0	315
Pseudomonas aeruginosa PMM38	100.0	315
Pseudomonas aeruginosa AUS158	100.0	315
Pseudomonas aeruginosa XDR-PA / assembly ARA01-045	100.0	315
Pseudomonas aeruginosa AZPAE15040	100.0	315
Pseudomonas aeruginosa Pae_CF67.09n	100.0	315
Pseudomonas aeruginosa isolate T52373	100.0	315
Pseudomonas aeruginosa isolate 82	100.0	315
Pseudomonas aeruginosa PASGNDM345	100.0	315
Pseudomonas aeruginosa PABL102	100.0	315
Pseudomonas aeruginosa JD303	100.0	315
Pseudomonas aeruginosa AUS177	100.0	315
Pseudomonas aeruginosa XDR-PA / assembly ARA02-009	100.0	315
Pseudomonas aeruginosa AZPAE14892	100.0	315
Pseudomonas aeruginosa Pae_CF67.09o	100.0	315
Pseudomonas aeruginosa isolate T63266	100.0	315
Pseudomonas aeruginosa SCH_ABX10	100.0	315
Pseudomonas aeruginosa 2570	100.0	315
Pseudomonas aeruginosa PABL071	100.0	315
Pseudomonas aeruginosa U0272B	100.0	315
Pseudomonas aeruginosa AUS157	100.0	315
Pseudomonas aeruginosa XDR-PA / assembly ARA02-015	100.0	315
Pseudomonas aeruginosa AZPAE14890	100.0	315
Pseudomonas aeruginosa Pae_CF67.09p	100.0	315
Pseudomonas aeruginosa WH-SGI-V-07642	100.0	315
Pseudomonas aeruginosa SD9	100.0	315
Pseudomonas aeruginosa PAS3	100.0	315
Pseudomonas aeruginosa PABL089	100.0	315
Pseudomonas aeruginosa Cotonu1	100.0	315
Pseudomonas aeruginosa T3677	100.0	315
Pseudomonas aeruginosa XDR-PA / assembly ARA02-040	100.0	315
Pseudomonas aeruginosa AZPAE14889	100.0	315
Pseudomonas aeruginosa Pae_CF67.09q	100.0	315
Pseudomonas aeruginosa WH-SGI-V-07644	100.0	315
Pseudomonas aeruginosa isolate 310.1	100.0	315
Pseudomonas aeruginosa S402_C09_RS	100.0	315
Pseudomonas aeruginosa PABL098	100.0	315
Pseudomonas aeruginosa S2239_15	100.0	315
Pseudomonas aeruginosa P2733	100.0	315
Pseudomonas aeruginosa XDR-PA / assembly AST01-007	100.0	315
Pseudomonas aeruginosa AZPAE15041	100.0	315
Pseudomonas aeruginosa Pae_CF67.09r	100.0	315
Pseudomonas aeruginosa WH-SGI-V-07645	100.0	315
Pseudomonas aeruginosa isolate 176	100.0	315
Pseudomonas aeruginosa env137a	100.0	315
Pseudomonas aeruginosa PABL073	100.0	315
Pseudomonas aeruginosa LiA179_2006	100.0	315
Pseudomonas aeruginosa W15Okt31	100.0	315
Pseudomonas aeruginosa XDR-PA / assembly ARA03-008	100.0	315
Pseudomonas aeruginosa AZPAE14887	100.0	315
Pseudomonas aeruginosa Pae_CF67.09s	100.0	315
Pseudomonas aeruginosa WH-SGI-V-07649	100.0	315
Pseudomonas aeruginosa isolate 335	100.0	315
Pseudomonas aeruginosa NCTC6750	100.0	315
Pseudomonas aeruginosa PABL076	100.0	315
Pseudomonas aeruginosa Jp245	100.0	315
Pseudomonas aeruginosa W15Aug23	100.0	315
Pseudomonas aeruginosa XDR-PA / assembly ARA01-015	100.0	315
Pseudomonas aeruginosa AZPAE14882	100.0	315
Pseudomonas aeruginosa Pae_CF67.09t	100.0	315
Pseudomonas aeruginosa WH-SGI-V-07680	100.0	315
Pseudomonas aeruginosa isolate 360	100.0	315
Pseudomonas aeruginosa KCRI-260 isolate R0004_260	100.0	315
Pseudomonas aeruginosa PABL058	100.0	315
Pseudomonas aeruginosa CPHL10299	100.0	315
Pseudomonas aeruginosa Jp1303	100.0	315
Pseudomonas aeruginosa XDR-PA / assembly BAL01-034	100.0	315
Pseudomonas aeruginosa AZPAE14880	100.0	315
Pseudomonas aeruginosa Pae_CF67.10a	100.0	315
Pseudomonas aeruginosa WH-SGI-V-07687	100.0	315
Pseudomonas aeruginosa isolate 93	100.0	315
Pseudomonas aeruginosa 2353	100.0	315
Pseudomonas aeruginosa PABL095	100.0	315
Pseudomonas aeruginosa CPHL6749	100.0	315
Pseudomonas aeruginosa AMT0020-83	100.0	315
Pseudomonas aeruginosa XDR-PA / assembly BAL01-013	100.0	315
Pseudomonas aeruginosa AZPAE14877	100.0	315
Pseudomonas aeruginosa Pae_CF67.10b	100.0	315
Pseudomonas aeruginosa WH-SGI-V-07689	100.0	315
Pseudomonas aeruginosa isolate 186	100.0	315
Pseudomonas aeruginosa AR_0447	100.0	315
Pseudomonas aeruginosa PABL093	100.0	315
Pseudomonas aeruginosa Tu61	100.0	315
Pseudomonas aeruginosa AMT0005-137	100.0	315
Pseudomonas aeruginosa XDR-PA / assembly ARA02-017	100.0	315
Pseudomonas aeruginosa AZPAE14876	100.0	315
Pseudomonas aeruginosa Pae_CF67.10c	100.0	315
Pseudomonas aeruginosa WH-SGI-V-07690	100.0	315
Pseudomonas aeruginosa isolate 78	100.0	315
Pseudomonas aeruginosa AR_0095	100.0	315
Pseudomonas aeruginosa PABL075	100.0	315
Pseudomonas aeruginosa SWPA15J=NSWPA15a	100.0	315
Pseudomonas aeruginosa AUS456	100.0	315
Pseudomonas aeruginosa XDR-PA / assembly BAL02-013	100.0	315
Pseudomonas aeruginosa AZPAE14874	100.0	315
Pseudomonas aeruginosa Pae_CF67.10d	100.0	315
Pseudomonas aeruginosa WH-SGI-V-07693	100.0	315
Pseudomonas aeruginosa isolate 315	100.0	315
Pseudomonas aeruginosa env140	100.0	315
Pseudomonas aeruginosa PABL084	100.0	315
Pseudomonas aeruginosa Mex2	100.0	315
Pseudomonas aeruginosa AUS455	100.0	315
Pseudomonas aeruginosa XDR-PA / assembly BAL02-023	100.0	315
Pseudomonas aeruginosa AZPAE14873	100.0	315
Pseudomonas aeruginosa Pae_CF67.10e	100.0	315
Pseudomonas aeruginosa WH-SGI-V-07694	100.0	315
Pseudomonas aeruginosa isolate 352	100.0	315
Pseudomonas aeruginosa U1j-3	100.0	315
Pseudomonas aeruginosa PABL083	100.0	315
Pseudomonas aeruginosa CN573=PSE143	100.0	315
Pseudomonas aeruginosa AUS074	100.0	315
Pseudomonas aeruginosa XDR-PA / assembly BAL03-028	100.0	315
Pseudomonas aeruginosa AZPAE15039	100.0	315
Pseudomonas aeruginosa Pae_CF67.10f	100.0	315
Pseudomonas aeruginosa WH-SGI-V-07699	100.0	315
Pseudomonas sp HMSC073F05	100.0	315
Pseudomonas aeruginosa 359	100.0	315
Pseudomonas aeruginosa PABL074	100.0	315
Pseudomonas aeruginosa 59.20	100.0	315
Pseudomonas aeruginosa AUS500	100.0	315
Pseudomonas aeruginosa XDR-PA / assembly CAN01-004	100.0	315
Pseudomonas aeruginosa AZPAE15046	100.0	315
Pseudomonas aeruginosa Pae_CF67.10g	100.0	315
Pseudomonas aeruginosa isolate H47921	100.0	315
Pseudomonas aeruginosa isolate 235	100.0	315
Pseudomonas aeruginosa env165	100.0	315
Pseudomonas aeruginosa PABL059	100.0	315
Pseudomonas aeruginosa A237	100.0	315
Pseudomonas aeruginosa AUS176	100.0	315
Pseudomonas aeruginosa XDR-PA / assembly CAN01-038	100.0	315
Pseudomonas aeruginosa AZPAE14866	100.0	315
Pseudomonas aeruginosa Pae_CF67.10h	100.0	315
Pseudomonas aeruginosa WH-SGI-V-07703	100.0	315
Pseudomonas aeruginosa PAO1_Orsay	100.0	315
Pseudomonas aeruginosa 148	100.0	315
Pseudomonas aeruginosa PABL077	100.0	315
Pseudomonas aeruginosa Co399645	100.0	315
Pseudomonas aeruginosa AUS139	100.0	315
Pseudomonas aeruginosa XDR-PA / assembly CAN01-039	100.0	315
Pseudomonas aeruginosa AZPAE14865	100.0	315
Pseudomonas aeruginosa Pae_CF67.10i	100.0	315
Pseudomonas aeruginosa isolate M37351	100.0	315
Pseudomonas aeruginosa isolate 60.1	100.0	315
Pseudomonas aeruginosa env113b	100.0	315
Pseudomonas aeruginosa PABL057	100.0	315
Pseudomonas aeruginosa U451	100.0	315
Pseudomonas aeruginosa AUS156	100.0	315
Pseudomonas aeruginosa XDR-PA / assembly CAT01-001	100.0	315
Pseudomonas aeruginosa AZPAE14864	100.0	315
Pseudomonas aeruginosa Pae_CF67.10j	100.0	315
Pseudomonas aeruginosa WH-SGI-V-07706	100.0	315
Pseudomonas aeruginosa isolate 114	100.0	315
Pseudomonas aeruginosa Pa58	100.0	315
Pseudomonas aeruginosa PABL042	100.0	315
Pseudomonas aeruginosa U397A	100.0	315
Pseudomonas aeruginosa AUS122	100.0	315
Pseudomonas aeruginosa XDR-PA / assembly BAL03-002	100.0	315
Pseudomonas aeruginosa AZPAE14861	100.0	315
Pseudomonas aeruginosa Pae_CF67.10k	100.0	315
Pseudomonas aeruginosa WH-SGI-V-07707	100.0	315
Pseudomonas aeruginosa isolate 65	100.0	315
Pseudomonas aeruginosa UQCCR 35166-1996 AC02	100.0	315
Pseudomonas aeruginosa PABL068	100.0	315
Pseudomonas aeruginosa U0306	100.0	315
Pseudomonas aeruginosa AUS277	100.0	315
Pseudomonas aeruginosa XDR-PA / assembly CAT02-007	100.0	315
Pseudomonas aeruginosa AZPAE14860	100.0	315
Pseudomonas aeruginosa Pae_CF67.10m	100.0	315
Pseudomonas aeruginosa WH-SGI-V-07247	100.0	315
Pseudomonas aeruginosa isolate 227	100.0	315
Pseudomonas aeruginosa U1i	100.0	315
Pseudomonas aeruginosa PABL069	100.0	315
Pseudomonas aeruginosa S2820	100.0	315
Pseudomonas aeruginosa AUS523	100.0	315
Pseudomonas aeruginosa XDR-PA / assembly CAT02-012	100.0	315
Pseudomonas aeruginosa AZPAE14859	100.0	315
Pseudomonas aeruginosa Pae_CF67.10n	100.0	315
Pseudomonas aeruginosa WH-SGI-V-07248	100.0	315
Pseudomonas aeruginosa PAC08	100.0	315
Pseudomonas aeruginosa env102	100.0	315
Pseudomonas aeruginosa PABL061	100.0	315
Pseudomonas aeruginosa Pae110	100.0	315
Pseudomonas aeruginosa AUS516	100.0	315
Pseudomonas aeruginosa XDR-PA / assembly CAT02-018	100.0	315
Pseudomonas aeruginosa PACS2	100.0	315
Pseudomonas aeruginosa AZPAE14910	100.0	315
Pseudomonas aeruginosa Pae_CF67.10o	100.0	315
Pseudomonas aeruginosa WH-SGI-V-07250	100.0	315
Pseudomonas aeruginosa CCF_715	100.0	315
Pseudomonas aeruginosa PA34	100.0	315
Pseudomonas aeruginosa PABL026	100.0	315
Pseudomonas aeruginosa LiA96_2004	100.0	315
Pseudomonas aeruginosa AUS227	100.0	315
Pseudomonas aeruginosa XDR-PA / assembly CAN01-025	100.0	315
Pseudomonas aeruginosa PAO1	100.0	315
Pseudomonas aeruginosa AZPAE14856	100.0	315
Pseudomonas aeruginosa Pae_CF67.10p	100.0	315
Pseudomonas aeruginosa WH-SGI-V-07253	100.0	315
Pseudomonas aeruginosa isolate 355	100.0	315
Pseudomonas aeruginosa S434_C09_BS	100.0	315
Pseudomonas aeruginosa PABL027	100.0	315
Pseudomonas aeruginosa Lw1047	100.0	315
Pseudomonas aeruginosa AUS222	100.0	315
Pseudomonas aeruginosa XDR-PA / assembly CAT02-020	100.0	315
Pseudomonas aeruginosa LESB58	100.0	315
Pseudomonas aeruginosa AZPAE14855	100.0	315
Pseudomonas aeruginosa Pae_CF67.10q	100.0	315
Pseudomonas aeruginosa WH-SGI-V-07254	100.0	315
Pseudomonas aeruginosa isolate 330	100.0	315
Pseudomonas aeruginosa PA31	100.0	315
Pseudomonas aeruginosa PABL066	100.0	315
Pseudomonas aeruginosa LiA50_2005	100.0	315
Pseudomonas aeruginosa AUS221	100.0	315
Pseudomonas aeruginosa XDR-PA / assembly CAT03-004	100.0	315
Pseudomonas aeruginosa B136-33	100.0	315
Pseudomonas aeruginosa AZPAE14852	100.0	315
Pseudomonas aeruginosa Pae_CF67.10r	100.0	315
Pseudomonas aeruginosa WH-SGI-V-07258	100.0	315
Pseudomonas aeruginosa isolate 241	100.0	315
Pseudomonas aeruginosa SJU-R10_1	100.0	315
Pseudomonas aeruginosa PABL046	100.0	315
Pseudomonas aeruginosa Bo559	100.0	315
Pseudomonas aeruginosa AUS174	100.0	315
Pseudomonas aeruginosa XDR-PA / assembly CAT04-032	100.0	315
Pseudomonas aeruginosa NCAIM B.001380	100.0	315
Pseudomonas aeruginosa AZPAE14847	100.0	315
Pseudomonas aeruginosa Pae_CF67.10s	100.0	315
Pseudomonas aeruginosa WH-SGI-V-07265	100.0	315
Pseudomonas aeruginosa isolate 373	100.0	315
Pseudomonas aeruginosa env172	100.0	315
Pseudomonas aeruginosa PABL055	100.0	315
Pseudomonas aeruginosa LiA145_2005	100.0	315
Pseudomonas aeruginosa AUS527	100.0	315
Pseudomonas aeruginosa XDR-PA / assembly CAT01-015	100.0	315
Pseudomonas aeruginosa PA21_ST175	100.0	315
Pseudomonas aeruginosa AZPAE15036	100.0	315
Pseudomonas aeruginosa Pae_CF67.10t	100.0	315
Pseudomonas aeruginosa WH-SGI-V-07267	100.0	315
Pseudomonas sp HMSC060G02	100.0	315
Pseudomonas aeruginosa X9820	100.0	315
Pseudomonas aeruginosa PABL063	100.0	315
Pseudomonas aeruginosa Us411	100.0	315
Pseudomonas aeruginosa AUS525	100.0	315
Pseudomonas aeruginosa XDR-PA / assembly CAT05-019	100.0	315
Pseudomonas aeruginosa HB15	100.0	315
Pseudomonas aeruginosa AZPAE14843	100.0	315
Pseudomonas aeruginosa Pae_CF67.11b	100.0	315
Pseudomonas aeruginosa WH-SGI-V-07282	100.0	315
Pseudomonas aeruginosa isolate 77	100.0	315
Pseudomonas aeruginosa KCRI-214 isolate R0003_214	100.0	315
Pseudomonas aeruginosa PABL045	100.0	315
Pseudomonas aeruginosa LiA91_2004	100.0	315
Pseudomonas aeruginosa AUS214	100.0	315
Pseudomonas aeruginosa XDR-PA / assembly CAT05-005	100.0	315
Pseudomonas aeruginosa MRW44.1	100.0	315
Pseudomonas aeruginosa AZPAE14842	100.0	315
Pseudomonas aeruginosa Pae_CF67.11c	100.0	315
Pseudomonas aeruginosa WH-SGI-V-07416	100.0	315
Pseudomonas aeruginosa isolate 311	100.0	315
Pseudomonas aeruginosa WCHPA075017	100.0	315
Pseudomonas aeruginosa PABL053	100.0	315
Pseudomonas aeruginosa CPHL10701	100.0	315
Pseudomonas aeruginosa GCID_CRE_0006	100.0	315
Pseudomonas aeruginosa XDR-PA / assembly CAT06-008	100.0	315
Pseudomonas aeruginosa PAO579	100.0	315
Pseudomonas aeruginosa AZPAE14909	100.0	315
Pseudomonas aeruginosa Pae_CF67.11d	100.0	315
Pseudomonas aeruginosa WH-SGI-V-07423	100.0	315
Pseudomonas aeruginosa isolate 200	100.0	315
Pseudomonas aeruginosa AR_0355	100.0	315
Pseudomonas aeruginosa PABL051	100.0	315
Pseudomonas aeruginosa LiA131_2005	100.0	315
Pseudomonas aeruginosa MRSN369569	100.0	315
Pseudomonas aeruginosa XDR-PA / assembly CAT06-016	100.0	315
Pseudomonas aeruginosa LCT-PA102	100.0	315
Pseudomonas aeruginosa PAO1H2O	100.0	315
Pseudomonas aeruginosa Pae_CF67.11e	100.0	315
Pseudomonas aeruginosa WH-SGI-V-07499	100.0	315
Pseudomonas aeruginosa isolate 40	100.0	315
Pseudomonas aeruginosa Env_47	100.0	315
Pseudomonas aeruginosa PABL023	100.0	315
Pseudomonas aeruginosa Jp97	100.0	315
Pseudomonas aeruginosa MRSN2144	100.0	315
Pseudomonas aeruginosa XDR-PA / assembly CAT08-020	100.0	315
Pseudomonas aeruginosa LCT-PA220	100.0	315
Pseudomonas aeruginosa MRSN18971	100.0	315
Pseudomonas aeruginosa Pae_CF67.11f	100.0	315
Pseudomonas aeruginosa WH-SGI-V-07501	100.0	315
Pseudomonas aeruginosa isolate 219	100.0	315
Pseudomonas aeruginosa 759	100.0	315
Pseudomonas aeruginosa PABL007	100.0	315
Pseudomonas aeruginosa CPHL8203	100.0	315
Pseudomonas aeruginosa MRSN18855	100.0	315
Pseudomonas aeruginosa XDR-PA / assembly CAT08-025	100.0	315
Pseudomonas aeruginosa LCT-PA41	100.0	315
Pseudomonas aeruginosa C2773C	100.0	315
Pseudomonas aeruginosa Pae_CF67.11g	100.0	315
Pseudomonas aeruginosa WH-SGI-V-07623	100.0	315
Pseudomonas aeruginosa isolate 314	100.0	315
Pseudomonas aeruginosa TUEPA7472	100.0	315
Pseudomonas aeruginosa PABL024	100.0	315
Pseudomonas aeruginosa CPHL2000	100.0	315
Pseudomonas aeruginosa MRSN317	100.0	315
Pseudomonas aeruginosa XDR-PA / assembly CAT09-009	100.0	315
Pseudomonas aeruginosa AH16	100.0	315
Pseudomonas aeruginosa JD323	100.0	315
Pseudomonas aeruginosa Pae_CF67.11h	100.0	315
Pseudomonas aeruginosa WH-SGI-V-07624	100.0	315
Pseudomonas aeruginosa AR_0092	100.0	315
Pseudomonas aeruginosa env187	100.0	315
Pseudomonas aeruginosa PABL028	100.0	315
Pseudomonas aeruginosa CPHL950	100.0	315
Pseudomonas aeruginosa SP4527	100.0	315
Pseudomonas aeruginosa XDR-PA / assembly CAT09-001	100.0	315
Pseudomonas aeruginosa CF77	100.0	315
Pseudomonas aeruginosa VRFPA07	100.0	315
Pseudomonas aeruginosa Pae_CF67.11i	100.0	315
Pseudomonas aeruginosa WH-SGI-V-07632	100.0	315
Pseudomonas sp HMSC063H08	100.0	315
Pseudomonas aeruginosa D2-463	100.0	315
Pseudomonas aeruginosa PABL035	100.0	315
Pseudomonas aeruginosa CND03	100.0	315
Pseudomonas aeruginosa GIMC5016:PA1840	100.0	315
Pseudomonas aeruginosa XDR-PA / assembly CAT08-034	100.0	315
Pseudomonas aeruginosa C52	100.0	315
Pseudomonas aeruginosa PAO1-VE13	100.0	315
Pseudomonas aeruginosa Pae_CF67.11j	100.0	315
Pseudomonas aeruginosa WH-SGI-V-07679	100.0	315
Pseudomonas aeruginosa isolate 67	100.0	315
Pseudomonas aeruginosa S122_C02_RS	100.0	315
Pseudomonas aeruginosa PABL034	100.0	315
Pseudomonas aeruginosa C5311	100.0	315
Pseudomonas aeruginosa LW	100.0	315
Pseudomonas aeruginosa XDR-PA / assembly CAT09-018	100.0	315
Pseudomonas aeruginosa C51	100.0	315
Pseudomonas aeruginosa PAO1-VE2	100.0	315
Pseudomonas aeruginosa Pae_CF67.11k	100.0	315
Pseudomonas aeruginosa WH-SGI-V-07683	100.0	315
Pseudomonas aeruginosa isolate 94	100.0	315
Pseudomonas aeruginosa MRSN12280	100.0	315
Pseudomonas aeruginosa PABL006	100.0	315
Pseudomonas aeruginosa A19	100.0	315
Pseudomonas aeruginosa Pae113	100.0	315
Pseudomonas aeruginosa XDR-PA / assembly CLE02-032	100.0	315
Pseudomonas aeruginosa C48	100.0	315
Pseudomonas aeruginosa C7447m	100.0	315
Pseudomonas aeruginosa Pae_CF67.12a	100.0	315
Pseudomonas aeruginosa WH-SGI-V-07684	100.0	315
Pseudomonas aeruginosa CCF_776	100.0	315
Pseudomonas aeruginosa env225	100.0	315
Pseudomonas aeruginosa PABL030	100.0	315
Pseudomonas aeruginosa AMT0026-67	100.0	315
Pseudomonas aeruginosa Pae42	100.0	315
Pseudomonas aeruginosa XDR-PA / assembly CLE02-016	100.0	315
Pseudomonas aeruginosa C41	100.0	315
Pseudomonas aeruginosa PAO581	100.0	315
Pseudomonas aeruginosa Pae_CF67.11l	100.0	315
Pseudomonas aeruginosa WH-SGI-V-07691	100.0	315
Pseudomonas aeruginosa isolate 19	100.0	315
Pseudomonas aeruginosa FDAARGOS_340	100.0	315
Pseudomonas aeruginosa PABL019	100.0	315
Pseudomonas aeruginosa PUPa3	100.0	315
Pseudomonas aeruginosa Pae81	100.0	315
Pseudomonas aeruginosa XDR-PA / assembly CLM02-005	100.0	315
Pseudomonas aeruginosa C40	100.0	315
Pseudomonas aeruginosa C 1334	100.0	315
Pseudomonas aeruginosa Pae_CF67.11m	100.0	315
Pseudomonas aeruginosa WH-SGI-V-07695	100.0	315
Pseudomonas aeruginosa isolate 84	100.0	315
Pseudomonas aeruginosa 838	100.0	315
Pseudomonas aeruginosa PABL015	100.0	315
Pseudomonas aeruginosa AMT0046-1	100.0	315
Pseudomonas aeruginosa Pae29	100.0	315
Pseudomonas aeruginosa XDR-PA / assembly CVA01-006	100.0	315
Pseudomonas aeruginosa M8A.4	100.0	315
Pseudomonas aeruginosa C 763	100.0	315
Pseudomonas aeruginosa Pae_CF67.11n	100.0	315
Pseudomonas aeruginosa WH-SGI-V-07701	100.0	315
Pseudomonas aeruginosa isolate 247	100.0	315
Pseudomonas aeruginosa S827_C17_BS	100.0	315
Pseudomonas aeruginosa PABL014	100.0	315
Pseudomonas aeruginosa AMT0020-84	100.0	315
Pseudomonas aeruginosa Pae66	100.0	315
Pseudomonas aeruginosa XDR-PA / assembly CLM02-043	100.0	315
Pseudomonas aeruginosa M8A.3	100.0	315
Pseudomonas aeruginosa E2UoS	100.0	315
Pseudomonas aeruginosa Pae_CF67.11o	100.0	315
Pseudomonas aeruginosa WH-SGI-V-07710	100.0	315
Pseudomonas aeruginosa isolate 257	100.0	315
Pseudomonas aeruginosa WCHPA075025	100.0	315
Pseudomonas aeruginosa PABL013	100.0	315
Pseudomonas aeruginosa AMT0006-1	100.0	315
Pseudomonas aeruginosa Pae21	100.0	315
Pseudomonas aeruginosa XDR-PA / assembly CLM02-046	100.0	315
Pseudomonas aeruginosa M8A.2	100.0	315
Pseudomonas aeruginosa C 1426	100.0	315
Pseudomonas aeruginosa Pae_CF67.11p	100.0	315
Pseudomonas aeruginosa WH-SGI-V-07299	100.0	315
Pseudomonas aeruginosa isolate 317	100.0	315
Pseudomonas aeruginosa T6313	100.0	315
Pseudomonas aeruginosa PABL091	100.0	315
Pseudomonas aeruginosa AMT0005-138	100.0	315
Pseudomonas aeruginosa PAO1161	100.0	315
Pseudomonas aeruginosa XDR-PA / assembly CVA01-029	100.0	315
Pseudomonas aeruginosa M8A.1	100.0	315
Pseudomonas aeruginosa YL84	100.0	315
Pseudomonas aeruginosa Pae_CF67.11q	100.0	315
Pseudomonas aeruginosa WH-SGI-V-07255	100.0	315
Pseudomonas aeruginosa isolate 222	100.0	315
Pseudomonas aeruginosa env084	100.0	315
Pseudomonas aeruginosa W-101	100.0	315
Pseudomonas aeruginosa AUS422	100.0	315
Pseudomonas aeruginosa M63	100.0	315
Pseudomonas aeruginosa XDR-PA / assembly CVA01-035	100.0	315
Pseudomonas aeruginosa BL24	100.0	315
Pseudomonas aeruginosa LESlike1	100.0	315
Pseudomonas aeruginosa Pae_CF67.11s	100.0	315
Pseudomonas aeruginosa WH-SGI-V-07278	100.0	315
Pseudomonas sp HMSC16B01	100.0	315
Pseudomonas aeruginosa env142	100.0	315
Pseudomonas aeruginosa PABL012	100.0	315
Pseudomonas aeruginosa AUS441	100.0	315
Pseudomonas aeruginosa M66	100.0	315
Pseudomonas aeruginosa XDR-PA / assembly CVA01-033	100.0	315
Pseudomonas aeruginosa BL23	100.0	315
Pseudomonas aeruginosa PA96	100.0	315
Pseudomonas aeruginosa Pae_CF67.11t	100.0	315
Pseudomonas aeruginosa WH-SGI-V-07266	100.0	315
Pseudomonas aeruginosa isolate 86	100.0	315
Pseudomonas aeruginosa F34365	100.0	315
Pseudomonas aeruginosa PABL017	100.0	315
Pseudomonas aeruginosa AUS595	100.0	315
Pseudomonas aeruginosa M67	100.0	315
Pseudomonas aeruginosa XDR-PA / assembly CVA02-018	100.0	315
Pseudomonas aeruginosa BL21	100.0	315
Pseudomonas aeruginosa ID4365	100.0	315
Pseudomonas aeruginosa Pae_CF67.12d	100.0	315
Pseudomonas aeruginosa WH-SGI-V-07276	100.0	315
Pseudomonas aeruginosa isolate 24	100.0	315
Pseudomonas aeruginosa ATCC BAA-2108	100.0	315
Pseudomonas aeruginosa 24Pae112	100.0	315
Pseudomonas aeruginosa AUS442	100.0	315
Pseudomonas aeruginosa M10	100.0	315
Pseudomonas aeruginosa XDR-PA / assembly CVA02-017	100.0	315
Pseudomonas aeruginosa BL20	100.0	315
Pseudomonas aeruginosa PA_ST235	100.0	315
Pseudomonas aeruginosa Pae_CF67.12c	100.0	315
Pseudomonas aeruginosa WH-SGI-V-07277	100.0	315
Pseudomonas aeruginosa isolate 229	100.0	315
Pseudomonas aeruginosa env396b	100.0	315
Pseudomonas aeruginosa N15-01092	100.0	315
Pseudomonas aeruginosa AUS439	100.0	315
Pseudomonas aeruginosa M65	100.0	315
Pseudomonas aeruginosa XDR-PA / assembly CVA02-019	100.0	315
Pseudomonas aeruginosa BL19	100.0	315
Pseudomonas aeruginosa ATCC 33988	100.0	315
Pseudomonas aeruginosa Pae_CF67.12e	100.0	315
Pseudomonas aeruginosa WH-SGI-V-07293	100.0	315
Pseudomonas aeruginosa CCF_834	100.0	315
Pseudomonas aeruginosa SJU-W4_2	100.0	315
Pseudomonas aeruginosa PA_139357	100.0	315
Pseudomonas aeruginosa AUS050	100.0	315
Pseudomonas aeruginosa M64	100.0	315
Pseudomonas aeruginosa XDR-PA / assembly CVA02-023	100.0	315
Pseudomonas aeruginosa BL18	100.0	315
Pseudomonas aeruginosa P2-L230/95	100.0	315
Pseudomonas aeruginosa Pae_CF67.12f	100.0	315
Pseudomonas aeruginosa WH-SGI-V-07294	100.0	315
Pseudomonas aeruginosa PHLS08916	100.0	315
Pseudomonas aeruginosa Ortho-1	100.0	315
Pseudomonas aeruginosa PA_150210	100.0	315
Pseudomonas aeruginosa AUS436	100.0	315
Pseudomonas aeruginosa PA-VAP-1	100.0	315
Pseudomonas aeruginosa XDR-PA / assembly CVA03-024	100.0	315
Pseudomonas aeruginosa BL17	100.0	315
Pseudomonas aeruginosa WS394	100.0	315
Pseudomonas aeruginosa Pae_CF67.12g	100.0	315
Pseudomonas aeruginosa WH-SGI-V-07295	100.0	315
Pseudomonas aeruginosa isolate 359	100.0	315
Pseudomonas aeruginosa RNS_PA92	100.0	315
Pseudomonas aeruginosa PA_27853	100.0	315
Pseudomonas aeruginosa AUS496	100.0	315
Pseudomonas aeruginosa PA-VAP-2	100.0	315
Pseudomonas aeruginosa XDR-PA / assembly CVA03-019	100.0	315
Pseudomonas aeruginosa BL15	100.0	315
Pseudomonas aeruginosa AZPAE15035	100.0	315
Pseudomonas aeruginosa Pae_CF67.12h	100.0	315
Pseudomonas aeruginosa WH-SGI-V-07306	100.0	315
Pseudomonas aeruginosa isolate 361	100.0	315
Pseudomonas aeruginosa M74707	100.0	315
Pseudomonas aeruginosa PA_4823	100.0	315
Pseudomonas aeruginosa AUS489	100.0	315
Pseudomonas aeruginosa 178	100.0	315
Pseudomonas aeruginosa XDR-PA / assembly EXT01-024	100.0	315
Pseudomonas aeruginosa BL14	100.0	315
Pseudomonas aeruginosa AZPAE14840	100.0	315
Pseudomonas aeruginosa Pae_CF67.12i	100.0	315
Pseudomonas aeruginosa isolate F9670	100.0	315
Pseudomonas aeruginosa isolate 354	100.0	315
Pseudomonas aeruginosa AR_0352	100.0	315
Pseudomonas aeruginosa PA_152603	100.0	315
Pseudomonas aeruginosa AUS434	100.0	315
Pseudomonas aeruginosa 175	100.0	315
Pseudomonas aeruginosa XDR-PA / assembly GAL03-013	100.0	315
Pseudomonas aeruginosa BL12	100.0	315
Pseudomonas aeruginosa AZPAE14919	100.0	315
Pseudomonas aeruginosa Pae_CF67.12j	100.0	315
Pseudomonas aeruginosa WH-SGI-V-07309	100.0	315
Pseudomonas aeruginosa isolate 166	100.0	315
Pseudomonas aeruginosa PA175	100.0	315
Pseudomonas aeruginosa PA_153837	100.0	315
Pseudomonas aeruginosa AUS499	100.0	315
Pseudomonas aeruginosa 170	100.0	315
Pseudomonas aeruginosa XDR-PA / assembly GAL04-041	100.0	315
Pseudomonas aeruginosa BL09	100.0	315
Pseudomonas aeruginosa AZPAE14863	100.0	315
Pseudomonas aeruginosa Pae_CF67.12k	100.0	315
Pseudomonas aeruginosa WH-SGI-V-07486	100.0	315
Pseudomonas aeruginosa isolate 237	100.0	315
Pseudomonas aeruginosa FFUP_PS_144	100.0	315
Pseudomonas aeruginosa PA_152361	100.0	315
Pseudomonas aeruginosa AUS165	100.0	315
Pseudomonas aeruginosa 171	100.0	315
Pseudomonas aeruginosa XDR-PA / assembly GAL05-003	100.0	315
Pseudomonas aeruginosa BL08	100.0	315
Pseudomonas aeruginosa AZPAE14869	100.0	315
Pseudomonas aeruginosa Pae_CF67.12l	100.0	315
Pseudomonas aeruginosa WH-SGI-V-07647	100.0	315
Pseudomonas aeruginosa 511653	100.0	315
Pseudomonas aeruginosa PASGNDM583	100.0	315
Pseudomonas aeruginosa PA_151908	100.0	315
Pseudomonas aeruginosa AUS154	100.0	315
Pseudomonas aeruginosa 166	100.0	315
Pseudomonas aeruginosa XDR-PA / assembly GAL06-007	100.0	315
Pseudomonas aeruginosa BL07	100.0	315
Pseudomonas aeruginosa AZPAE14871	100.0	315
Pseudomonas aeruginosa Pae_CF67.12m	100.0	315
Pseudomonas aeruginosa WH-SGI-V-07625	100.0	315
Pseudomonas aeruginosa TRN6592	100.0	315
Pseudomonas aeruginosa PA37	100.0	315
Pseudomonas aeruginosa PA_150209	100.0	315
Pseudomonas aeruginosa AUS105	100.0	315
Pseudomonas aeruginosa 162	100.0	315
Pseudomonas aeruginosa XDR-PA / assembly GAL05-014	100.0	315
Pseudomonas aeruginosa BL05	100.0	315
Pseudomonas aeruginosa AZPAE14878	100.0	315
Pseudomonas aeruginosa Pae_CF67.12n	100.0	315
Pseudomonas aeruginosa WH-SGI-V-07646	100.0	315
Pseudomonas aeruginosa isolate 241.1	100.0	315
Pseudomonas aeruginosa PPF-18	100.0	315
Pseudomonas aeruginosa PA_CI	100.0	315
Pseudomonas aeruginosa AUS124	100.0	315
Pseudomonas aeruginosa 160	100.0	315
Pseudomonas aeruginosa XDR-PA / assembly GAL06-002	100.0	315
Pseudomonas aeruginosa BL03	100.0	315
Pseudomonas aeruginosa AZPAE14888	100.0	315
Pseudomonas aeruginosa Pae_CF67.12o	100.0	315
Pseudomonas aeruginosa NCGM257	100.0	315
Pseudomonas aeruginosa isolate 240	100.0	315
Pseudomonas aeruginosa 12939	100.0	315
Pseudomonas aeruginosa Pa423	100.0	315
Pseudomonas aeruginosa AUS089	100.0	315
Pseudomonas aeruginosa 158	100.0	315
Pseudomonas aeruginosa XDR-PA / assembly GAL06-038	100.0	315
Pseudomonas aeruginosa BWHPSA027	100.0	315
Pseudomonas aeruginosa AZPAE14956	100.0	315
Pseudomonas aeruginosa Pae_CF67.12p	100.0	315
Pseudomonas aeruginosa IOMTU 133	100.0	315
Pseudomonas aeruginosa isolate 411	100.0	315
Pseudomonas aeruginosa PASGNDM571	100.0	315
Pseudomonas aeruginosa Pa1076	100.0	315
Pseudomonas aeruginosa AUS119	100.0	315
Pseudomonas aeruginosa 154	100.0	315
Pseudomonas aeruginosa XDR-PA / assembly GAL06-015	100.0	315
Pseudomonas aeruginosa BWHPSA026	100.0	315
Pseudomonas aeruginosa AZPAE14960	100.0	315
Pseudomonas aeruginosa Pae_CF67.12q	100.0	315
Pseudomonas aeruginosa AU11866	100.0	315
Pseudomonas aeruginosa ATCC 27853	100.0	315
Pseudomonas aeruginosa SJU-W20_1	100.0	315
Pseudomonas aeruginosa BA7823	100.0	315
Pseudomonas aeruginosa AUS066	100.0	315
Pseudomonas aeruginosa 153	100.0	315
Pseudomonas aeruginosa XDR-PA / assembly GAL06-033	100.0	315
Pseudomonas aeruginosa BWHPSA021	100.0	315
Pseudomonas aeruginosa AZPAE14974	100.0	315
Pseudomonas aeruginosa Pae_CF67.12r	100.0	315
Pseudomonas aeruginosa AU21076	100.0	315
Pseudomonas aeruginosa isolate 220	100.0	315
Pseudomonas aeruginosa HIAE_PA18	100.0	315
Pseudomonas aeruginosa KOL-3	100.0	315
Pseudomonas aeruginosa AUS702	100.0	315
Pseudomonas aeruginosa 150	100.0	315
Pseudomonas aeruginosa XDR-PA / assembly ICA01-030	100.0	315
Pseudomonas aeruginosa BWHPSA020	100.0	315
Pseudomonas aeruginosa AZPAE15051	100.0	315
Pseudomonas aeruginosa Pae_CF67.05q	100.0	315
Pseudomonas aeruginosa AU5471	100.0	315
Pseudomonas aeruginosa S-Pae	100.0	315
Pseudomonas aeruginosa HIAE_PA06	100.0	315
Pseudomonas aeruginosa HUM-406	100.0	315
Pseudomonas aeruginosa AUS029	100.0	315
Pseudomonas aeruginosa 149	100.0	315
Pseudomonas aeruginosa XDR-PA / assembly ICA01-001	100.0	315
Pseudomonas aeruginosa BWHPSA018	100.0	315
Pseudomonas aeruginosa AZPAE14990	100.0	315
Pseudomonas aeruginosa Pae_CF67.05r	100.0	315
Pseudomonas aeruginosa AU9381	100.0	315
Pseudomonas aeruginosa isolate 90	100.0	315
Pseudomonas aeruginosa PB350	100.0	315
Pseudomonas aeruginosa VET-33	100.0	315
Pseudomonas aeruginosa AUS283	100.0	315
Pseudomonas aeruginosa 145	100.0	315
Pseudomonas aeruginosa XDR-PA / assembly ICA01-031	100.0	315
Pseudomonas aeruginosa BWHPSA017	100.0	315
Pseudomonas aeruginosa AZPAE15048	100.0	315
Pseudomonas aeruginosa Pae_CF67.05t	100.0	315
Pseudomonas aeruginosa AU10241	100.0	315
Pseudomonas aeruginosa isolate 353	100.0	315
Pseudomonas aeruginosa WCHPA075016	100.0	315
Pseudomonas aeruginosa VET-34	100.0	315
Pseudomonas aeruginosa AUS073	100.0	315
Pseudomonas aeruginosa 143	100.0	315
Pseudomonas aeruginosa XDR-PA / assembly MAD02-005	100.0	315
Pseudomonas aeruginosa BWHPSA016	100.0	315
Pseudomonas aeruginosa AZPAE15058	100.0	315
Pseudomonas aeruginosa Pae_CF67.06a	100.0	315
Pseudomonas aeruginosa AU10014	100.0	315
Pseudomonas aeruginosa isolate 184	100.0	315
Pseudomonas aeruginosa Env_32	100.0	315
Pseudomonas aeruginosa VET-54	100.0	315
Pseudomonas aeruginosa AUS058	100.0	315
Pseudomonas aeruginosa 141	100.0	315
Pseudomonas aeruginosa XDR-PA / assembly MAD01-021	100.0	315
Pseudomonas aeruginosa BWHPSA015	100.0	315
Pseudomonas aeruginosa AZPAE15067	100.0	315
Pseudomonas aeruginosa Pae_CF67.06c	100.0	315
Pseudomonas aeruginosa AU10015	100.0	315
Pseudomonas aeruginosa isolate 320	100.0	315
Pseudomonas aeruginosa env331b	100.0	315
Pseudomonas aeruginosa VET-36	100.0	315
Pseudomonas aeruginosa AUS026	100.0	315
Pseudomonas aeruginosa 140	100.0	315
Pseudomonas aeruginosa XDR-PA / assembly MAD02-006	100.0	315
Pseudomonas aeruginosa BWHPSA014	100.0	315
Pseudomonas aeruginosa AZPAE14939	100.0	315
Pseudomonas aeruginosa Pae_CF67.06b	100.0	315
Pseudomonas aeruginosa AU10714	100.0	315
Pseudomonas aeruginosa isolate 228	100.0	315
Pseudomonas aeruginosa RNS_PAE08	100.0	315
Pseudomonas aeruginosa HUM-303	100.0	315
Pseudomonas aeruginosa AUS504	100.0	315
Pseudomonas aeruginosa 135	100.0	315
Pseudomonas aeruginosa XDR-PA / assembly MAD02-009	100.0	315
Pseudomonas aeruginosa BWHPSA009	100.0	315
Pseudomonas aeruginosa AZPAE14905	100.0	315
Pseudomonas aeruginosa Pae_CF67.06d	100.0	315
Pseudomonas aeruginosa AU2342	100.0	315
Pseudomonas aeruginosa isolate 131	100.0	315
Pseudomonas aeruginosa KCRI-462 isolate RDK06_462	100.0	315
Pseudomonas aeruginosa VET-71	100.0	315
Pseudomonas aeruginosa AUS304	100.0	315
Pseudomonas aeruginosa 132	100.0	315
Pseudomonas aeruginosa XDR-PA / assembly MAD02-014	100.0	315
Pseudomonas aeruginosa BWHPSA006	100.0	315
Pseudomonas aeruginosa AZPAE14906	100.0	315
Pseudomonas aeruginosa Pae_CF67.06e	100.0	315
Pseudomonas aeruginosa AU6854	100.0	315
Pseudomonas aeruginosa isolate 20	100.0	315
Pseudomonas aeruginosa AR_0457	100.0	315
Pseudomonas aeruginosa VET-23	100.0	315
Pseudomonas aeruginosa AUS471	100.0	315
Pseudomonas aeruginosa 176	100.0	315
Pseudomonas aeruginosa XDR-PA / assembly MAD02-021	100.0	315
Pseudomonas aeruginosa BWHPSA002	100.0	315
Pseudomonas aeruginosa AZPAE14831	100.0	315
Pseudomonas aeruginosa Pae_CF67.06f	100.0	315
Pseudomonas aeruginosa AU20916	100.0	315
Pseudomonas aeruginosa isolate 2-2	100.0	315
Pseudomonas aeruginosa 354	100.0	315
Pseudomonas aeruginosa VET-26	100.0	315
Pseudomonas aeruginosa AUS407	100.0	315
Pseudomonas aeruginosa 172	100.0	315
Pseudomonas aeruginosa XDR-PA / assembly MAD02-035	100.0	315
Pseudomonas aeruginosa BWHPSA001	100.0	315
Pseudomonas aeruginosa AZPAE14838	100.0	315
Pseudomonas aeruginosa Pae_CF67.06g	100.0	315
Pseudomonas aeruginosa AU6462	100.0	315
Pseudomonas aeruginosa isolate 182	100.0	315
Pseudomonas aeruginosa RNS_PA69	100.0	315
Pseudomonas aeruginosa HUM-230	100.0	315
Pseudomonas aeruginosa AUS328	100.0	315
Pseudomonas aeruginosa 169	100.0	315
Pseudomonas aeruginosa XDR-PA / assembly MAD03-010	100.0	315
Pseudomonas aeruginosa X13273	100.0	315
Pseudomonas aeruginosa AZPAE14687	100.0	315
Pseudomonas aeruginosa Pae_CF67.06i	100.0	315
Pseudomonas aeruginosa AU7033	100.0	315
Pseudomonas aeruginosa isolate 323	100.0	315
Pseudomonas aeruginosa PPF-19	100.0	315
Pseudomonas aeruginosa VET-57	100.0	315
Pseudomonas aeruginosa AUS275	100.0	315
Pseudomonas aeruginosa 163	100.0	315
Pseudomonas aeruginosa XDR-PA / assembly MAD03-033	100.0	315
Pseudomonas aeruginosa S35004	100.0	315
Pseudomonas aeruginosa AZPAE14689	100.0	315
Pseudomonas aeruginosa Pae_CF67.06l	100.0	315
Pseudomonas aeruginosa AU10583	100.0	315
Pseudomonas aeruginosa isolate 308	100.0	315
Pseudomonas aeruginosa PA171	100.0	315
Pseudomonas aeruginosa VET-72	100.0	315
Pseudomonas aeruginosa AUS502	100.0	315
Pseudomonas aeruginosa 156	100.0	315
Pseudomonas aeruginosa XDR-PA / assembly MAD04-011	100.0	315
Pseudomonas aeruginosa 6077	100.0	315
Pseudomonas aeruginosa AZPAE14701	100.0	315
Pseudomonas aeruginosa Pae_CF67.06m	100.0	315
Pseudomonas aeruginosa AU10409	100.0	315
Pseudomonas aeruginosa isolate 440	100.0	315
Pseudomonas aeruginosa S819_C17_BS	100.0	315
Pseudomonas aeruginosa VET-41	100.0	315
Pseudomonas aeruginosa AUS210	100.0	315
Pseudomonas aeruginosa 155	100.0	315
Pseudomonas aeruginosa XDR-PA / assembly MAD02-012	100.0	315
Pseudomonas aeruginosa 19660	100.0	315
Pseudomonas aeruginosa AZPAE14816	100.0	315
Pseudomonas aeruginosa Pae_CF67.06n	100.0	315
Pseudomonas aeruginosa AU10272	100.0	315
Pseudomonas aeruginosa isolate 210	100.0	315
Pseudomonas aeruginosa Urg-5	100.0	315
Pseudomonas aeruginosa ENV-204	100.0	315
Pseudomonas aeruginosa AUS438	100.0	315
Pseudomonas aeruginosa 139	100.0	315
Pseudomonas aeruginosa XDR-PA / assembly MAD04-014	100.0	315
Pseudomonas aeruginosa JJ692	100.0	315
Pseudomonas aeruginosa AZPAE14827	100.0	315
Pseudomonas aeruginosa Pae_CF67.06q	100.0	315
Pseudomonas aeruginosa AU10410	100.0	315
Pseudomonas aeruginosa isolate 18	100.0	315
Pseudomonas aeruginosa ATCC BAA-2109	100.0	315
Pseudomonas aeruginosa ENV-206	100.0	315
Pseudomonas aeruginosa AUS205	100.0	315
Pseudomonas aeruginosa 121	100.0	315
Pseudomonas aeruginosa XDR-PA / assembly MAD04-028	100.0	315
Pseudomonas aeruginosa S54485	100.0	315
Pseudomonas aeruginosa AZPAE13856	100.0	315
Pseudomonas aeruginosa Pae_CF67.06r	100.0	315
Pseudomonas aeruginosa AU16821	100.0	315
Pseudomonas aeruginosa isolate 30	100.0	315
Pseudomonas aeruginosa PAS10	100.0	315
Pseudomonas aeruginosa HUM-344	100.0	315
Pseudomonas aeruginosa AUS185	100.0	315
Pseudomonas aeruginosa 37	100.0	315
Pseudomonas aeruginosa XDR-PA / assembly MAD04-041	100.0	315
Pseudomonas aeruginosa UDL	100.0	315
Pseudomonas aeruginosa AZPAE13866	100.0	315
Pseudomonas aeruginosa Pae_CF67.06s	100.0	315
Pseudomonas aeruginosa AU8251	100.0	315
Pseudomonas aeruginosa 608748_668748	100.0	315
Pseudomonas aeruginosa env097	100.0	315
Pseudomonas aeruginosa VET-45	100.0	315
Pseudomonas aeruginosa 152504sp2	100.0	315
Pseudomonas aeruginosa 101	100.0	315
Pseudomonas aeruginosa XDR-PA / assembly MAD06-017	100.0	315
Pseudomonas aeruginosa CF18	100.0	315
Pseudomonas aeruginosa AZPAE13872	100.0	315
Pseudomonas aeruginosa Pae_CF67.07a	100.0	315
Pseudomonas aeruginosa AU12528	100.0	315
Pseudomonas aeruginosa TRN6635	100.0	315
Pseudomonas aeruginosa H2-9me	100.0	315
Pseudomonas aeruginosa HUM-298	100.0	315
Pseudomonas aeruginosa 886-1	100.0	315
Pseudomonas aeruginosa 97	100.0	315
Pseudomonas aeruginosa XDR-PA / assembly MAD05-026	100.0	315
Pseudomonas aeruginosa CF127	100.0	315
Pseudomonas aeruginosa AZPAE13880	100.0	315
Pseudomonas aeruginosa Pae_CF67.07c	100.0	315
Pseudomonas aeruginosa AU17907	100.0	315
Pseudomonas aeruginosa isolate 4-2	100.0	315
Pseudomonas aeruginosa SJU-S72_2	100.0	315
Pseudomonas aeruginosa HUM-299	100.0	315
Pseudomonas aeruginosa 994	100.0	315
Pseudomonas aeruginosa 93	100.0	315
Pseudomonas aeruginosa XDR-PA / assembly MUR01-009	100.0	315
Pseudomonas aeruginosa MTB-1	100.0	315
Pseudomonas aeruginosa AZPAE14372	100.0	315
Pseudomonas aeruginosa Pae_CF67.07g	100.0	315
Pseudomonas aeruginosa AU13210	100.0	315
Pseudomonas aeruginosa isolate 378	100.0	315
Pseudomonas aeruginosa U1o-2	100.0	315
Pseudomonas aeruginosa VET-48	100.0	315
Pseudomonas aeruginosa 1090	100.0	315
Pseudomonas aeruginosa 90	100.0	315
Pseudomonas aeruginosa XDR-PA / assembly MUR01-026	100.0	315
Pseudomonas aeruginosa LES431	100.0	315
Pseudomonas aeruginosa AZPAE14379	100.0	315
Pseudomonas aeruginosa Pae_CF67.07h	100.0	315
Pseudomonas aeruginosa AU19803	100.0	315
Pseudomonas aeruginosa isolate 88	100.0	315
Pseudomonas aeruginosa W13a-2	100.0	315
Pseudomonas aeruginosa HUM-300	100.0	315
Pseudomonas aeruginosa 982	100.0	315
Pseudomonas aeruginosa 58	100.0	315
Pseudomonas aeruginosa XDR-PA / assembly PVA01-007	100.0	315
Pseudomonas aeruginosa PA1R	100.0	315
Pseudomonas aeruginosa AZPAE14398	100.0	315
Pseudomonas aeruginosa Pae_CF67.07j	100.0	315
Pseudomonas aeruginosa AU10658	100.0	315
Pseudomonas aeruginosa isolate 62	100.0	315
Pseudomonas aeruginosa env110a	100.0	315
Pseudomonas aeruginosa VET-37	100.0	315
Pseudomonas aeruginosa 903	100.0	315
Pseudomonas aeruginosa 31	100.0	315
Pseudomonas aeruginosa XDR-PA / assembly MUR01-033	100.0	315
Pseudomonas aeruginosa BL25	100.0	315
[truncated: 2,287 more rows]
